# Supplementary material for: Synthesis of blue light emitting heterocycles via cyclization of 2-pyridine derived 4-azido-r1,2,3-triazoles
Source: Royal Society of Chemistry journal article supplement (doi:10.1039/d1ob01084k), 2021-01-01
Supplement: d1ob01084k1.pdf [file d1ob01084k1.pdf]

**Supporting Information for**

**Synthesis of blue light emitting heterocycles via cyclization  
of 2-pyridine derived 4-azido-1,2,3-triazoles**

Biligma D. Tsyrenova<sup>a</sup>, Victor N. Khrustalev<sup>b,c</sup>, Valentine G. Nenajdenko<sup>a\*</sup>

*<sup>a</sup>M.V. Lomonosov Moscow State University, E-mail: nenajdenko@gmail.com*

*<sup>b</sup>Peoples' Friendship University of Russia (RUDN University)*

*<sup>c</sup>N.D. Zelinsky Institute of Organic Chemistry of Russian Academy of Sciences*

**Table of Contents**

|                                                                                     |   |
|-------------------------------------------------------------------------------------|---|
| <b>Photophysical Data</b> .....                                                     | 2 |
| <b>Copies of <sup>1</sup>H, <sup>13</sup>C and <sup>19</sup>F NMR Spectra</b> ..... | 5 |

### Photophysical Data

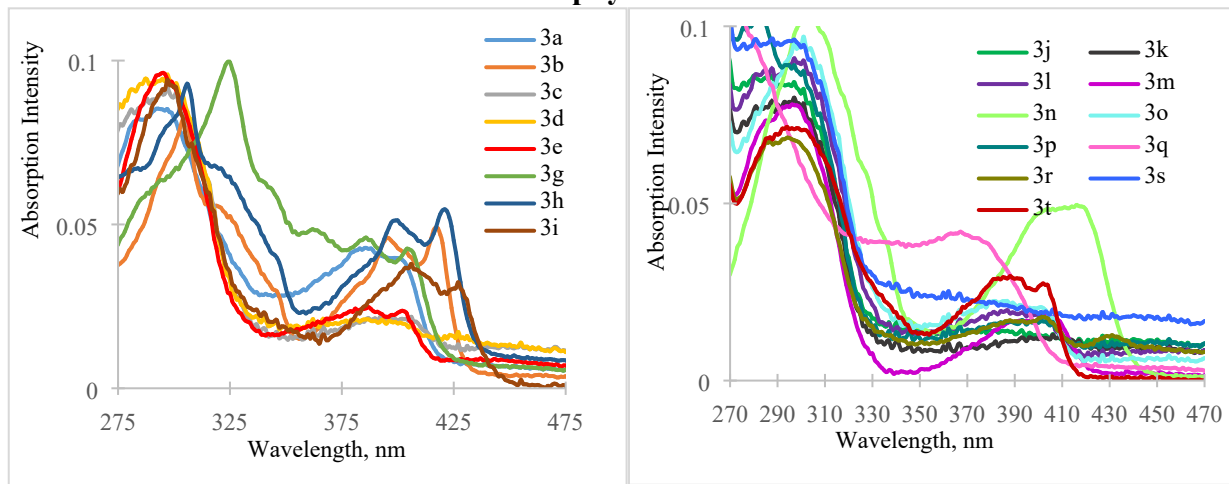

**Figure 1.** UV-Vis spectra of compounds **3**

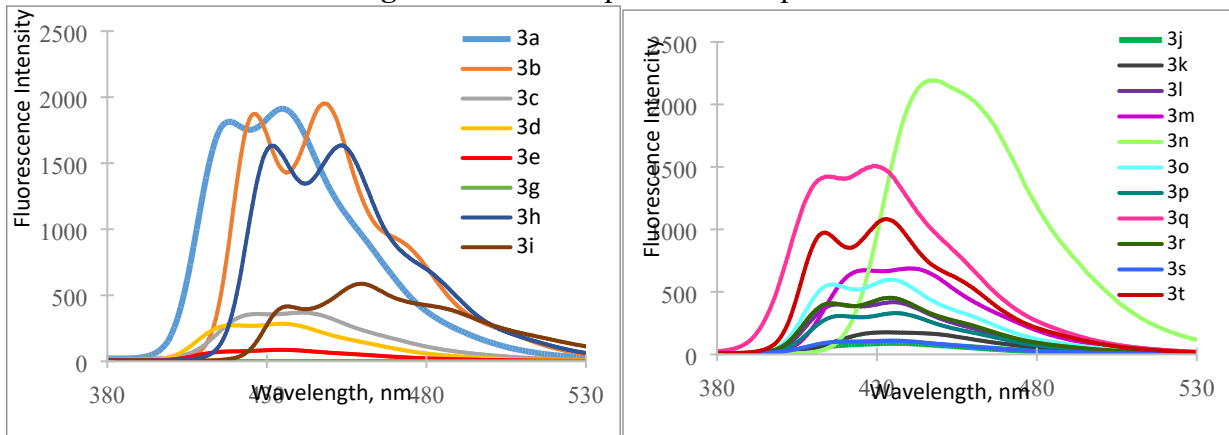

**Figure 2.** Emission Spectra for a series 2-aryl-2H-[1,2,3]triazolo[4',5':3,4]pyrazolo[1,5-a]pyridin-5-ium-4-ides **3a-3t**

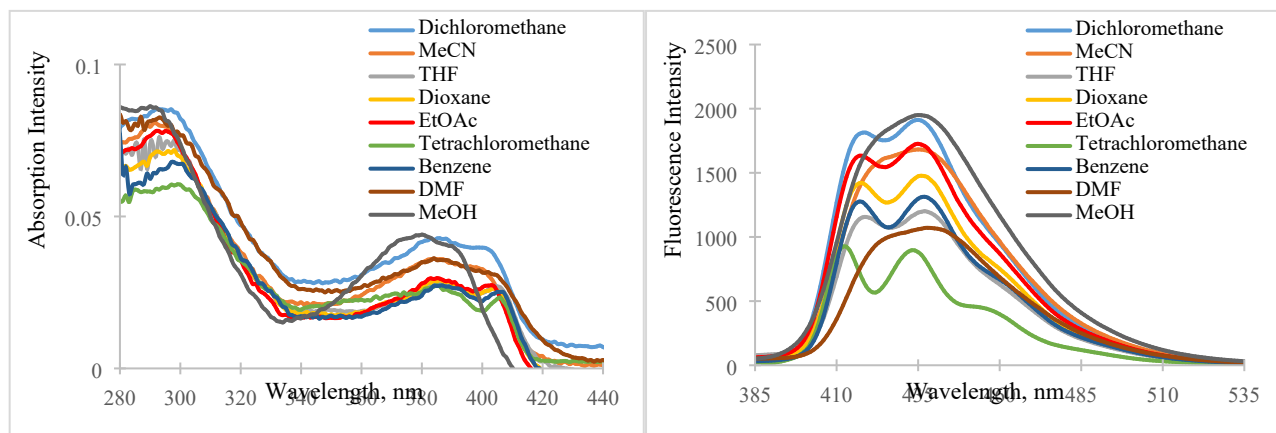

**Figure 3.** UV-Vis and Emission spectra for **3a** in different solvents

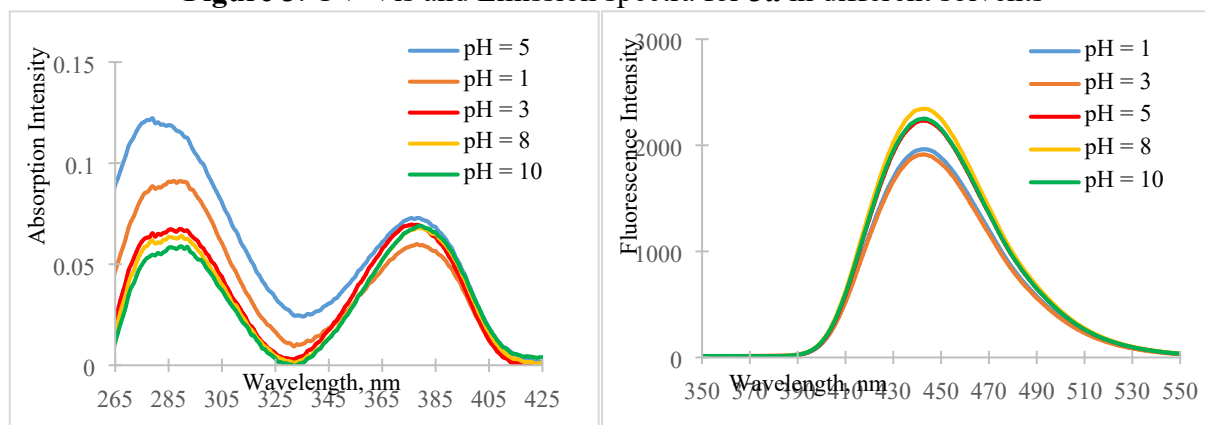

**Figure 4.** UV-Vis and Emission spectra for **3a** at different pH values

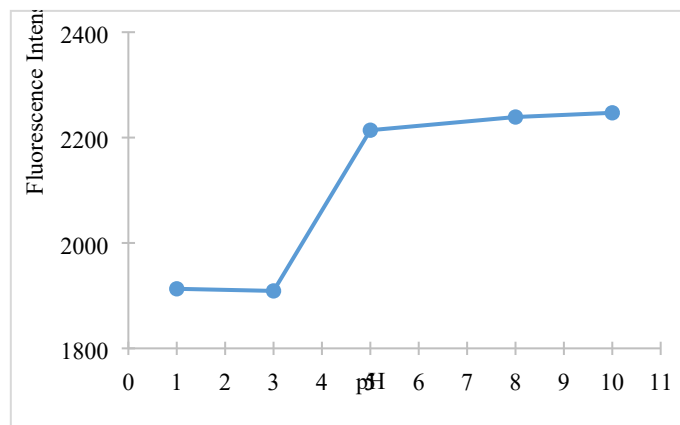

**Figure 5.** pH dependence of Fluorescence intensity for **3a**

### Copies of $^1\text{H}$ , $^{13}\text{C}$ and $^{19}\text{F}$ NMR Spectra

$^1\text{H}$  spectra of compounds **3c** (4.2%), **3e** (2.8%), **3j** (4.8%), **3o** (7.7%), **3q** (5.7%), **3s** (6.0%) contain 3-7.7% impurities.

18 Mar 2021

|                               |              |                             |                      |                              |                        |                               |        |
|-------------------------------|--------------|-----------------------------|----------------------|------------------------------|------------------------|-------------------------------|--------|
| <b>Acquisition Time (sec)</b> | 4.0894       | <b>Comment</b>              | Imported from UXNMR. |                              | <b>Date</b>            | 24 Nov 2020 15:20:24          |        |
| <b>File Name</b>              |              |                             |                      |                              | <b>Frequency (MHz)</b> | 400.13                        |        |
| <b>Nucleus</b>                | $^1\text{H}$ | <b>Number of Transients</b> | 4                    | <b>Original Points Count</b> | 32768                  | <b>Points Count</b>           | 131072 |
| <b>Pulse Sequence</b>         | zg30         | <b>Solvent</b>              | CHLOROFORM-D         | <b>Sweep Width (Hz)</b>      | 8012.82                | <b>Temperature (degree C)</b> | 27.000 |

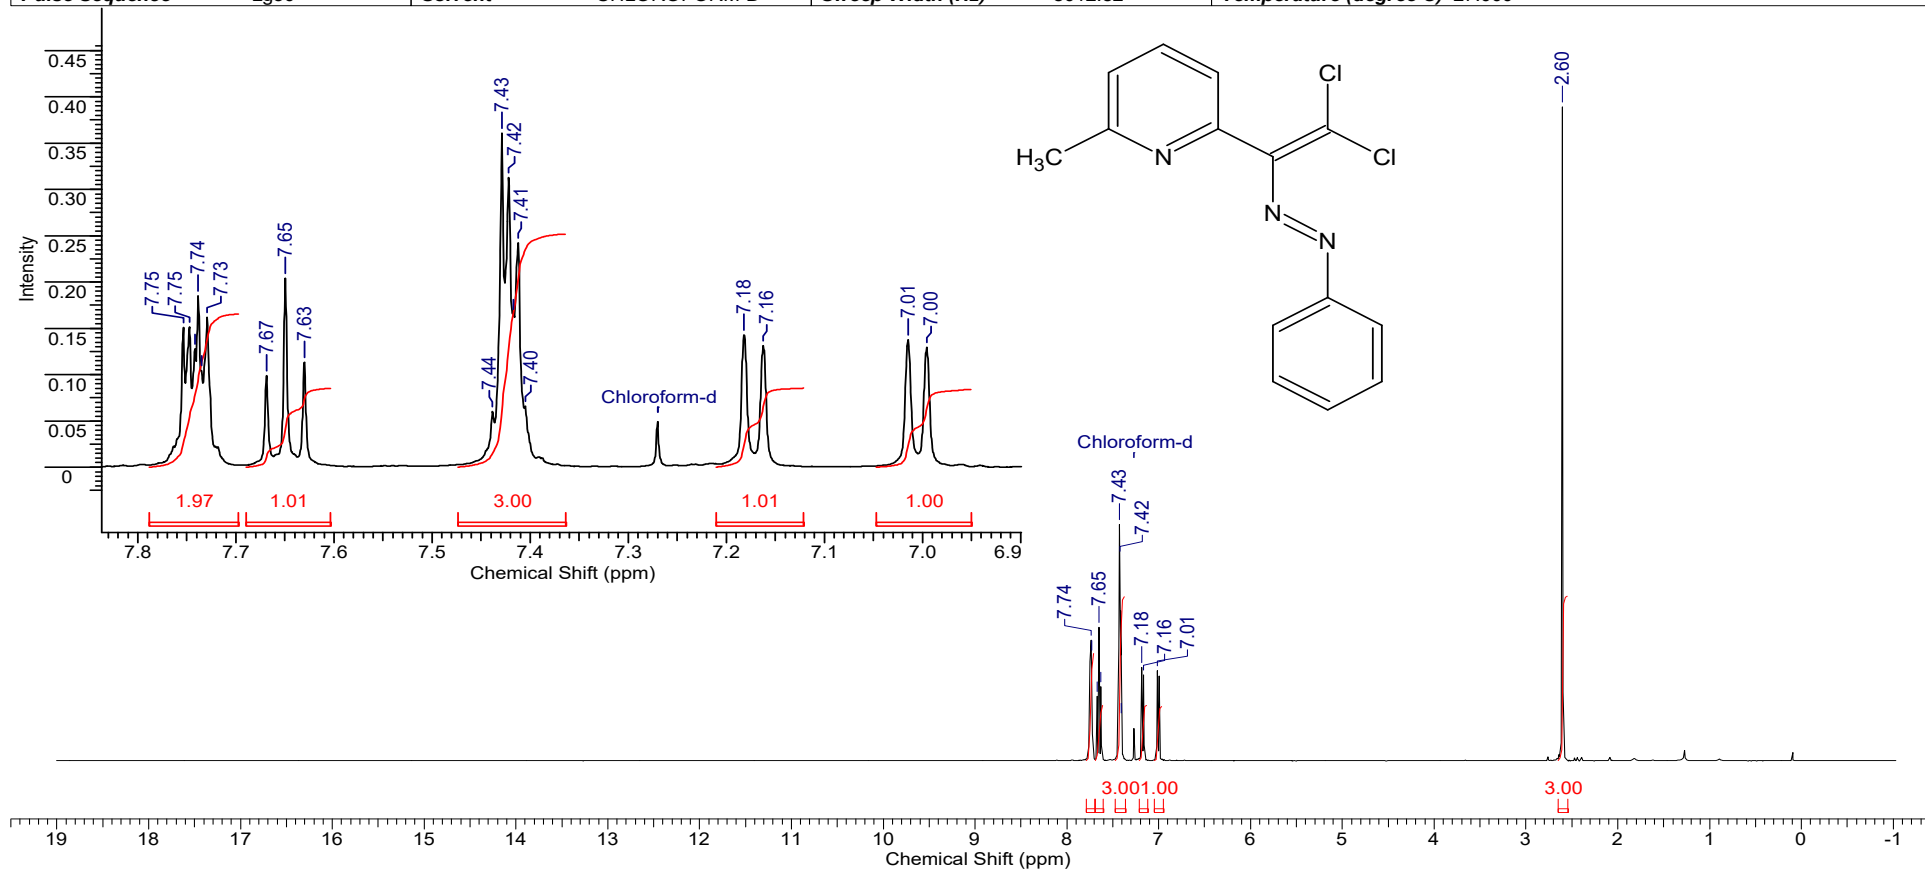

$^1\text{H}$  NMR spectrum of **1c** (400.1 MHz,  $\text{CDCl}_3$ )

|                               |                 |                             |                       |                              |                        |                               |        |
|-------------------------------|-----------------|-----------------------------|-----------------------|------------------------------|------------------------|-------------------------------|--------|
| <b>Acquisition Time (sec)</b> | 0.6783          | <b>Comment</b>              | Imported from UJXNMR. |                              | <b>Date</b>            | 24 Nov 2020 15:25:38          |        |
| <b>File Name</b>              |                 |                             |                       |                              | <b>Frequency (MHz)</b> | 100.61                        |        |
| <b>Nucleus</b>                | <sup>13</sup> C | <b>Number of Transients</b> | 82                    | <b>Original Points Count</b> | 16384                  | <b>Points Count</b>           | 131072 |
| <b>Pulse Sequence</b>         | zgpg30          | <b>Solvent</b>              | CHLOROFORM-D          | <b>Sweep Width (Hz)</b>      | 24154.59               | <b>Temperature (degree C)</b> | 27.000 |

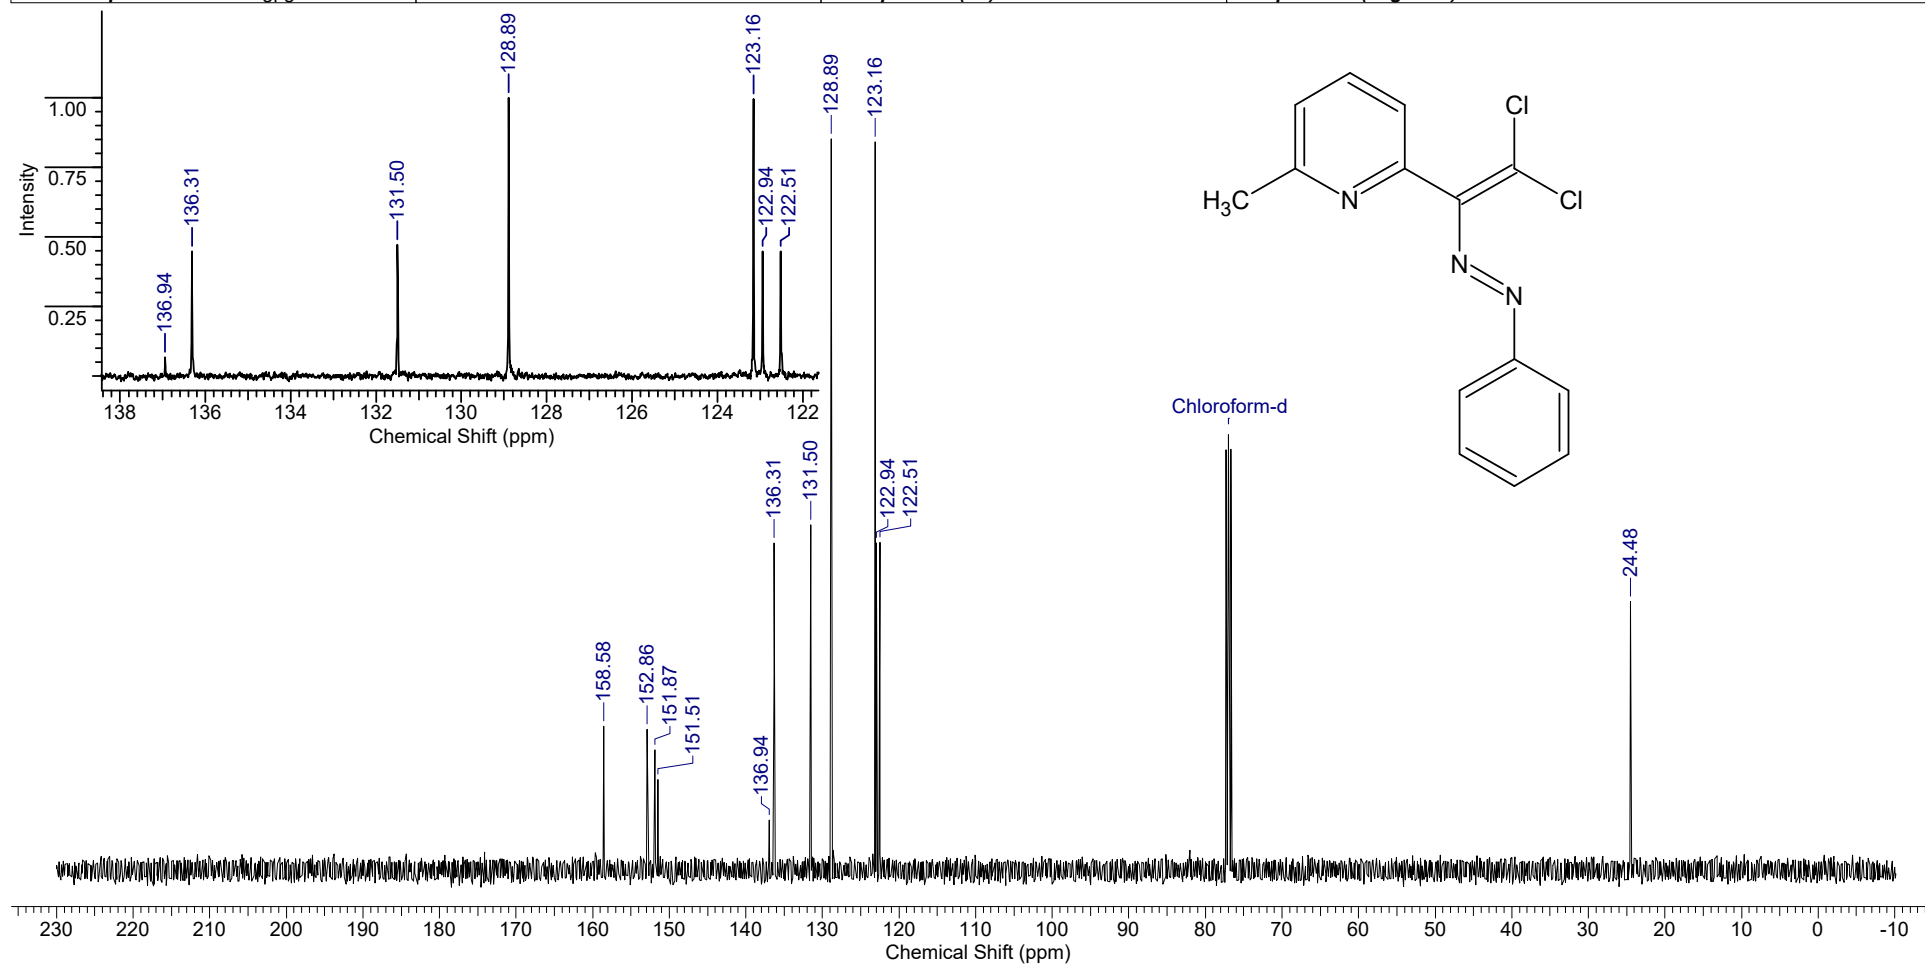

<sup>13</sup>C NMR spectrum of **1c** (100.6 MHz, CDCl<sub>3</sub>)

|                        |                |                      |                      |                       |                  |                      |        |
|------------------------|----------------|----------------------|----------------------|-----------------------|------------------|----------------------|--------|
| Acquisition Time (sec) | 4.0894         | Comment              | Imported from UXNMR. |                       | Date             | 23 Jan 2021 14:05:48 |        |
| File Name              |                |                      |                      |                       | Frequency (MHz)  | 400.13               |        |
| Nucleus                | <sup>1</sup> H | Number of Transients | 4                    | Original Points Count | 32768            | Points Count         | 131072 |
| Pulse Sequence         | zg30           | Solvent              | CHLOROFORM-D         |                       | Sweep Width (Hz) | 8012.82              |        |
| Temperature (degree C) | 27.000         |                      |                      |                       |                  |                      |        |

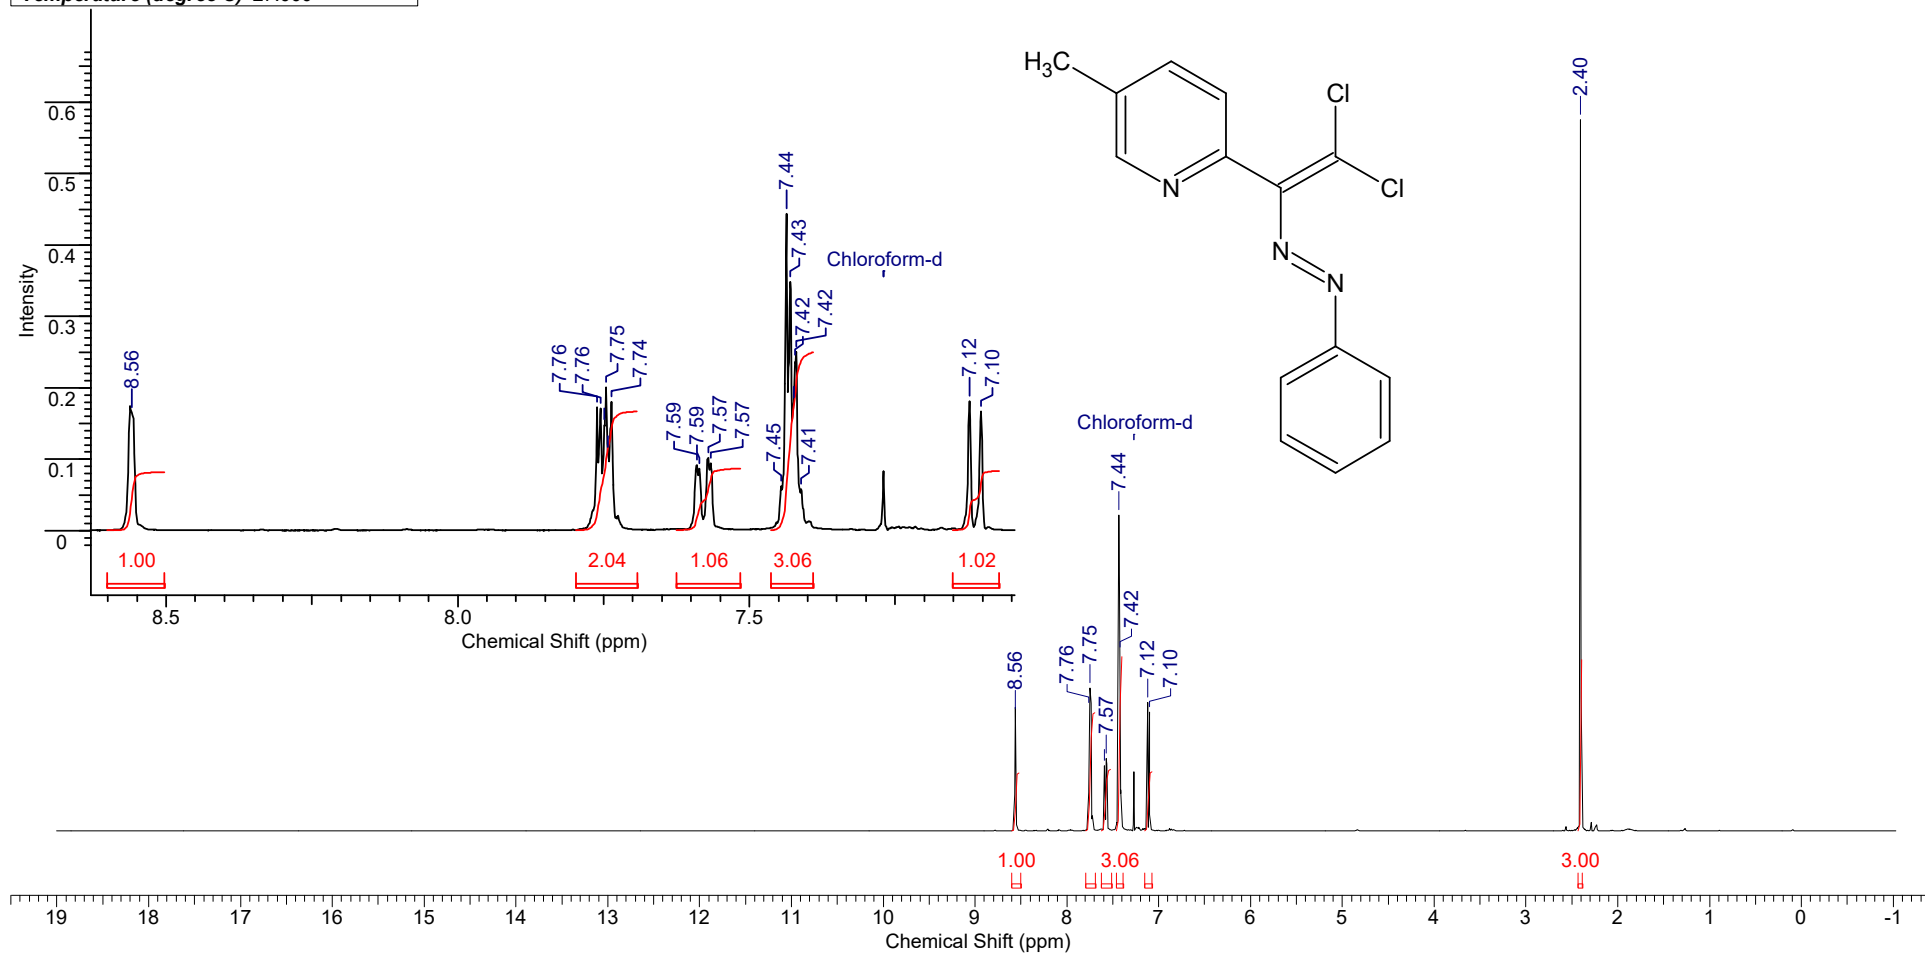

<sup>1</sup>H NMR spectrum of **1d** (400.1 MHz, CDCl<sub>3</sub>)

|                               |                 |                             |                      |                              |             |                               |        |
|-------------------------------|-----------------|-----------------------------|----------------------|------------------------------|-------------|-------------------------------|--------|
| <b>Acquisition Time (sec)</b> | 0.6783          | <b>Comment</b>              | Imported from UXMNR. |                              | <b>Date</b> | 23 Jan 2021 14:05:48          |        |
| <b>File Name</b>              |                 | <b>Number of Transients</b> | 161                  | <b>Original Points Count</b> | 16384       | <b>Frequency (MHz)</b>        | 100.61 |
| <b>Nucleus</b>                | <sup>13</sup> C | <b>Number of Transients</b> | 161                  | <b>Original Points Count</b> | 16384       | <b>Points Count</b>           | 131072 |
| <b>Pulse Sequence</b>         | zgpg30          | <b>Solvent</b>              | CHLOROFORM-D         | <b>Sweep Width (Hz)</b>      | 24154.59    | <b>Temperature (degree C)</b> | 27.000 |

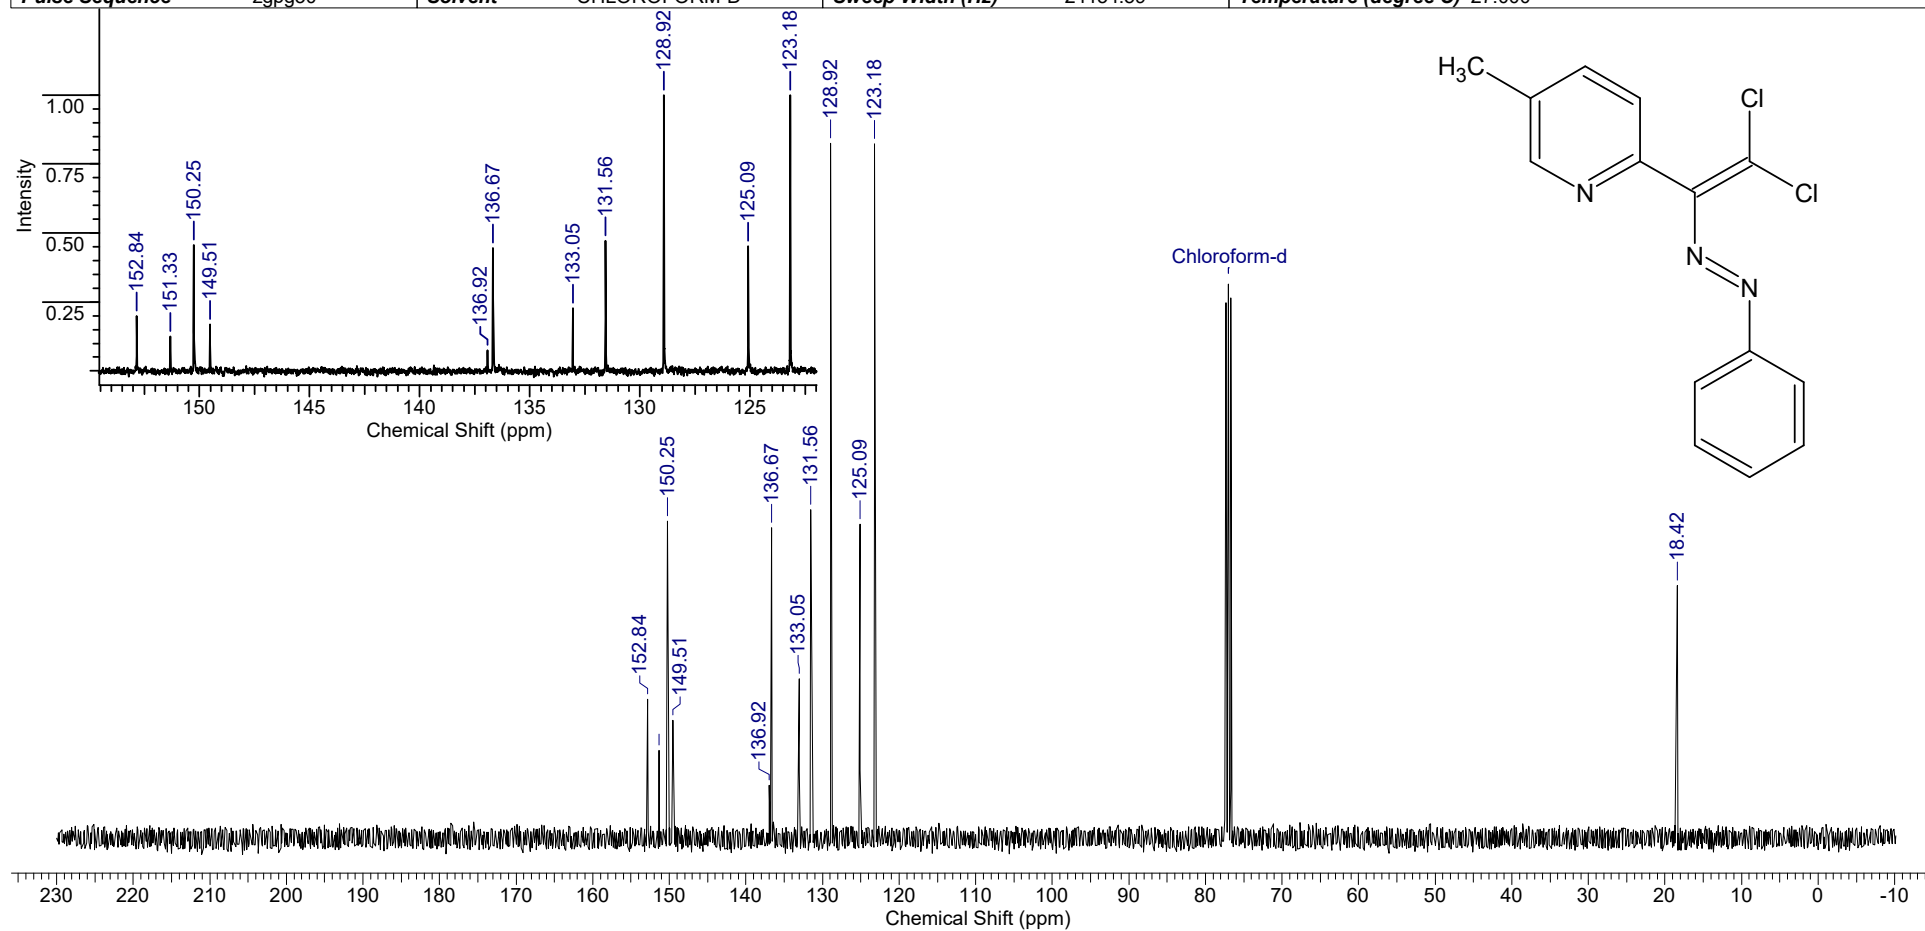

<sup>13</sup>C NMR spectrum of **1d** (100.6 MHz, CDCl<sub>3</sub>)



|                        |                |                      |                      |                       |                      |
|------------------------|----------------|----------------------|----------------------|-----------------------|----------------------|
| Acquisition Time (sec) | 4.0894         | Comment              | Imported from UXNMR. | Date                  | 21 Jan 2021 11:29:20 |
| File Name              |                |                      |                      | Frequency (MHz)       | 400.13               |
| Nucleus                | <sup>1</sup> H | Number of Transients | 4                    | Original Points Count | 32768                |
| Pulse Sequence         | zg30           | Solvent              | CHLOROFORM-D         | Points Count          | 131072               |
| Temperature (degree C) | 27.000         |                      |                      | Sweep Width (Hz)      | 8012.82              |

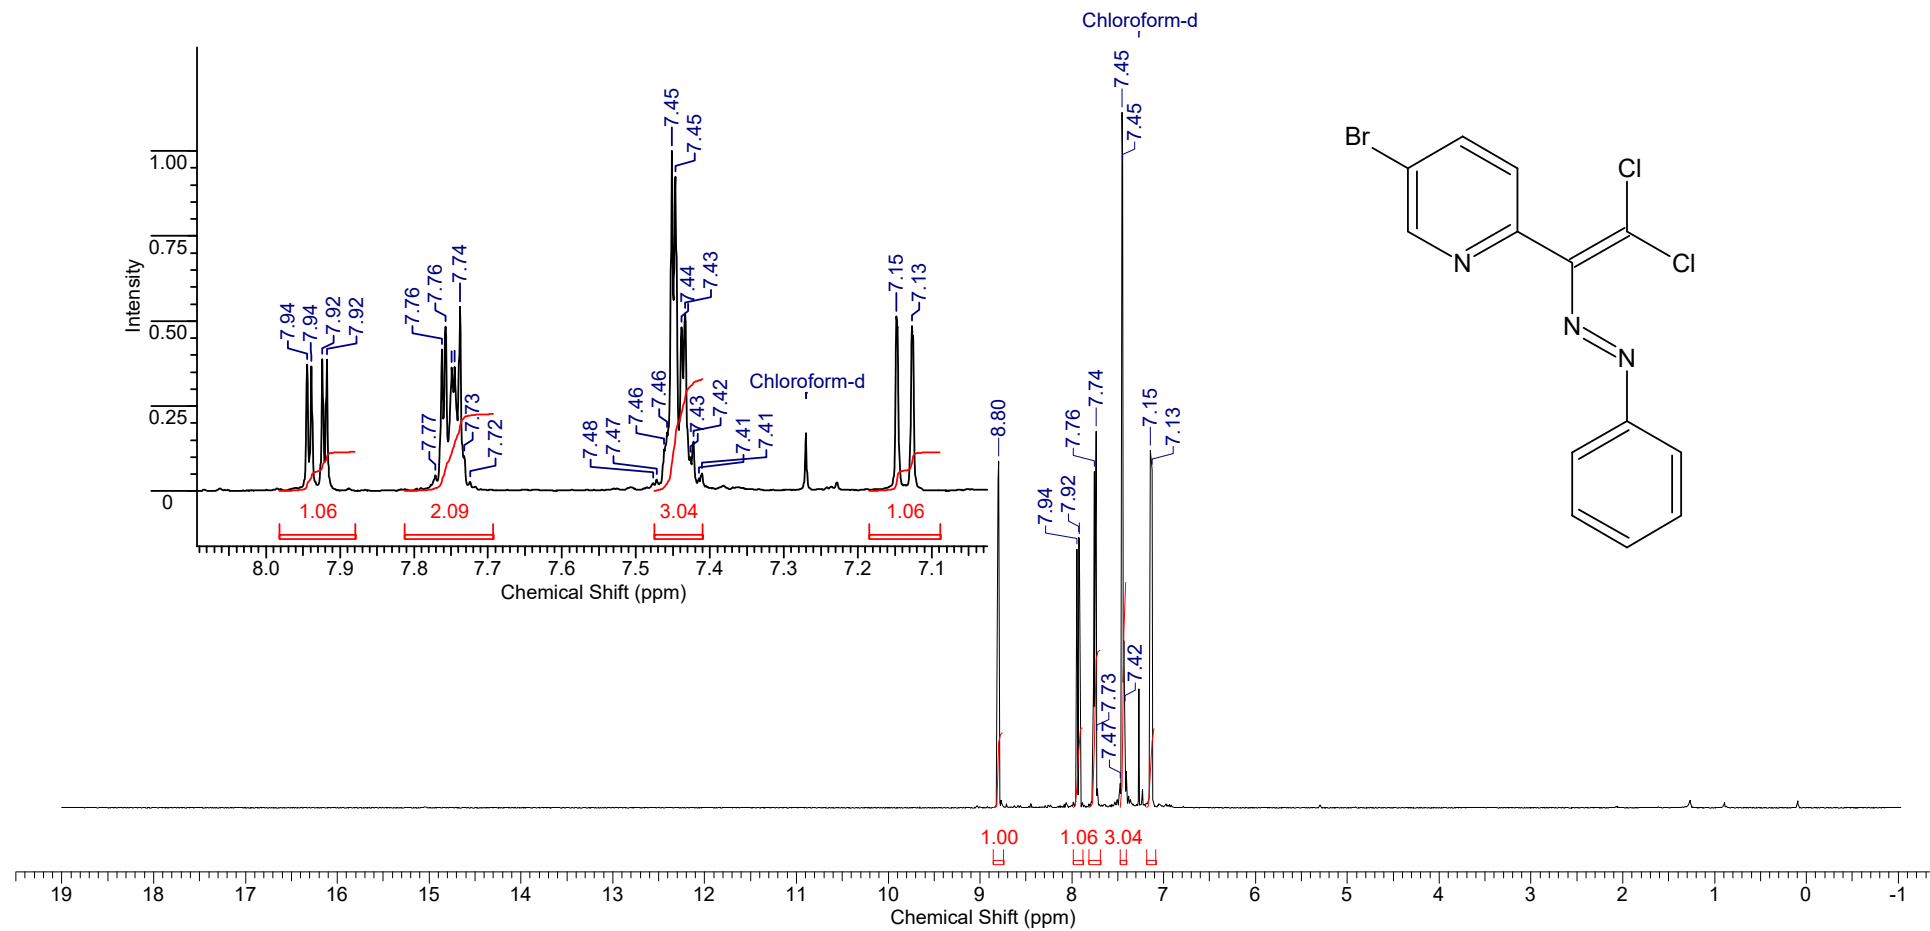

<sup>1</sup>H NMR spectrum of **1e** (400.1 MHz, CDCl<sub>3</sub>)

|                               |                 |                             |                      |                               |                      |
|-------------------------------|-----------------|-----------------------------|----------------------|-------------------------------|----------------------|
| <b>Acquisition Time (sec)</b> | 0.6783          | <b>Comment</b>              | Imported from UXMNR. | <b>Date</b>                   | 21 Jan 2021 11:35:44 |
| <b>File Name</b>              |                 |                             |                      | <b>Frequency (MHz)</b>        | 100.61               |
| <b>Nucleus</b>                | <sup>13</sup> C | <b>Number of Transients</b> | 81                   | <b>Original Points Count</b>  | 16384                |
| <b>Pulse Sequence</b>         | zgpg30          | <b>Solvent</b>              | CHLOROFORM-D         | <b>Sweep Width (Hz)</b>       | 24154.59             |
|                               |                 |                             |                      | <b>Points Count</b>           | 131072               |
|                               |                 |                             |                      | <b>Temperature (degree C)</b> | 27.000               |

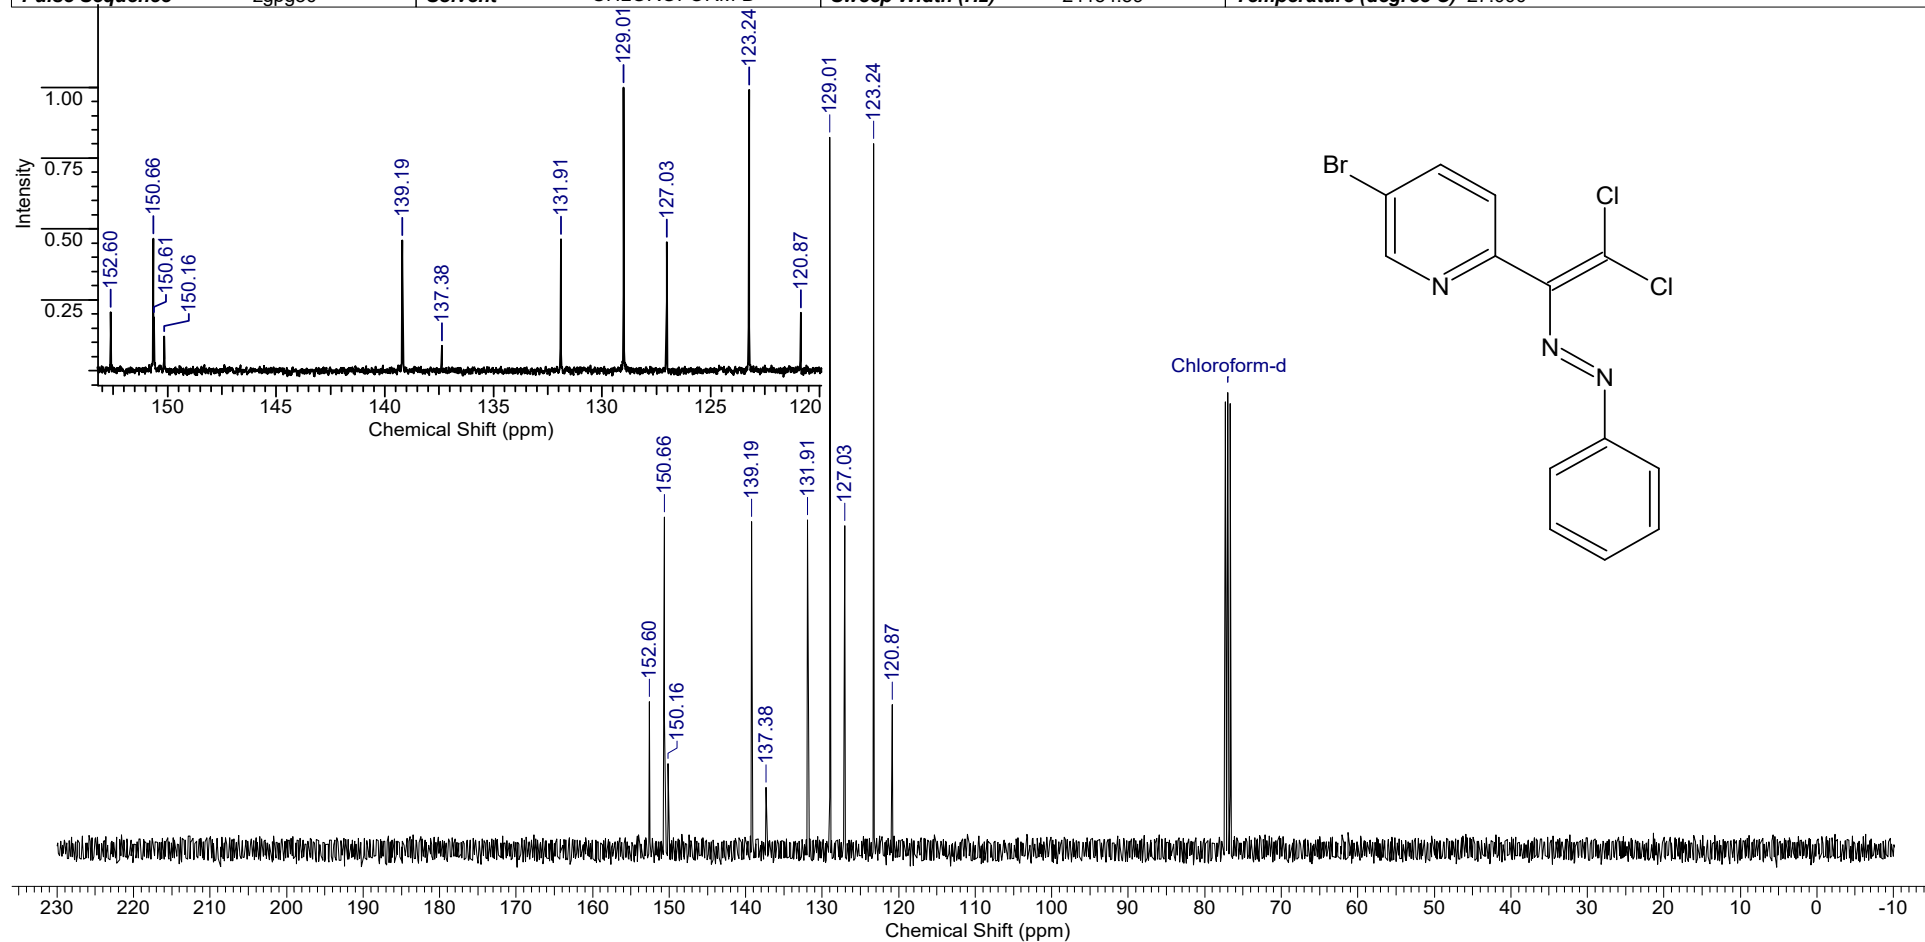

<sup>13</sup>C NMR spectrum of **1e** (100.6 MHz, CDCl<sub>3</sub>)

|                        |        |                      |                      |                       |                      |
|------------------------|--------|----------------------|----------------------|-----------------------|----------------------|
| Acquisition Time (sec) | 4.0894 | Comment              | Imported from UXNMR. | Date                  | 22 Jan 2021 15:28:24 |
| File Name              |        |                      |                      | Frequency (MHz)       | 400.13               |
| Nucleus                | 1H     | Number of Transients | 4                    | Original Points Count | 32768                |
| Pulse Sequence         | zg30   | Solvent              | CHLOROFORM-D         | Points Count          | 131072               |
| Temperature (degree C) | 27.000 |                      |                      | Sweep Width (Hz)      | 8012.82              |

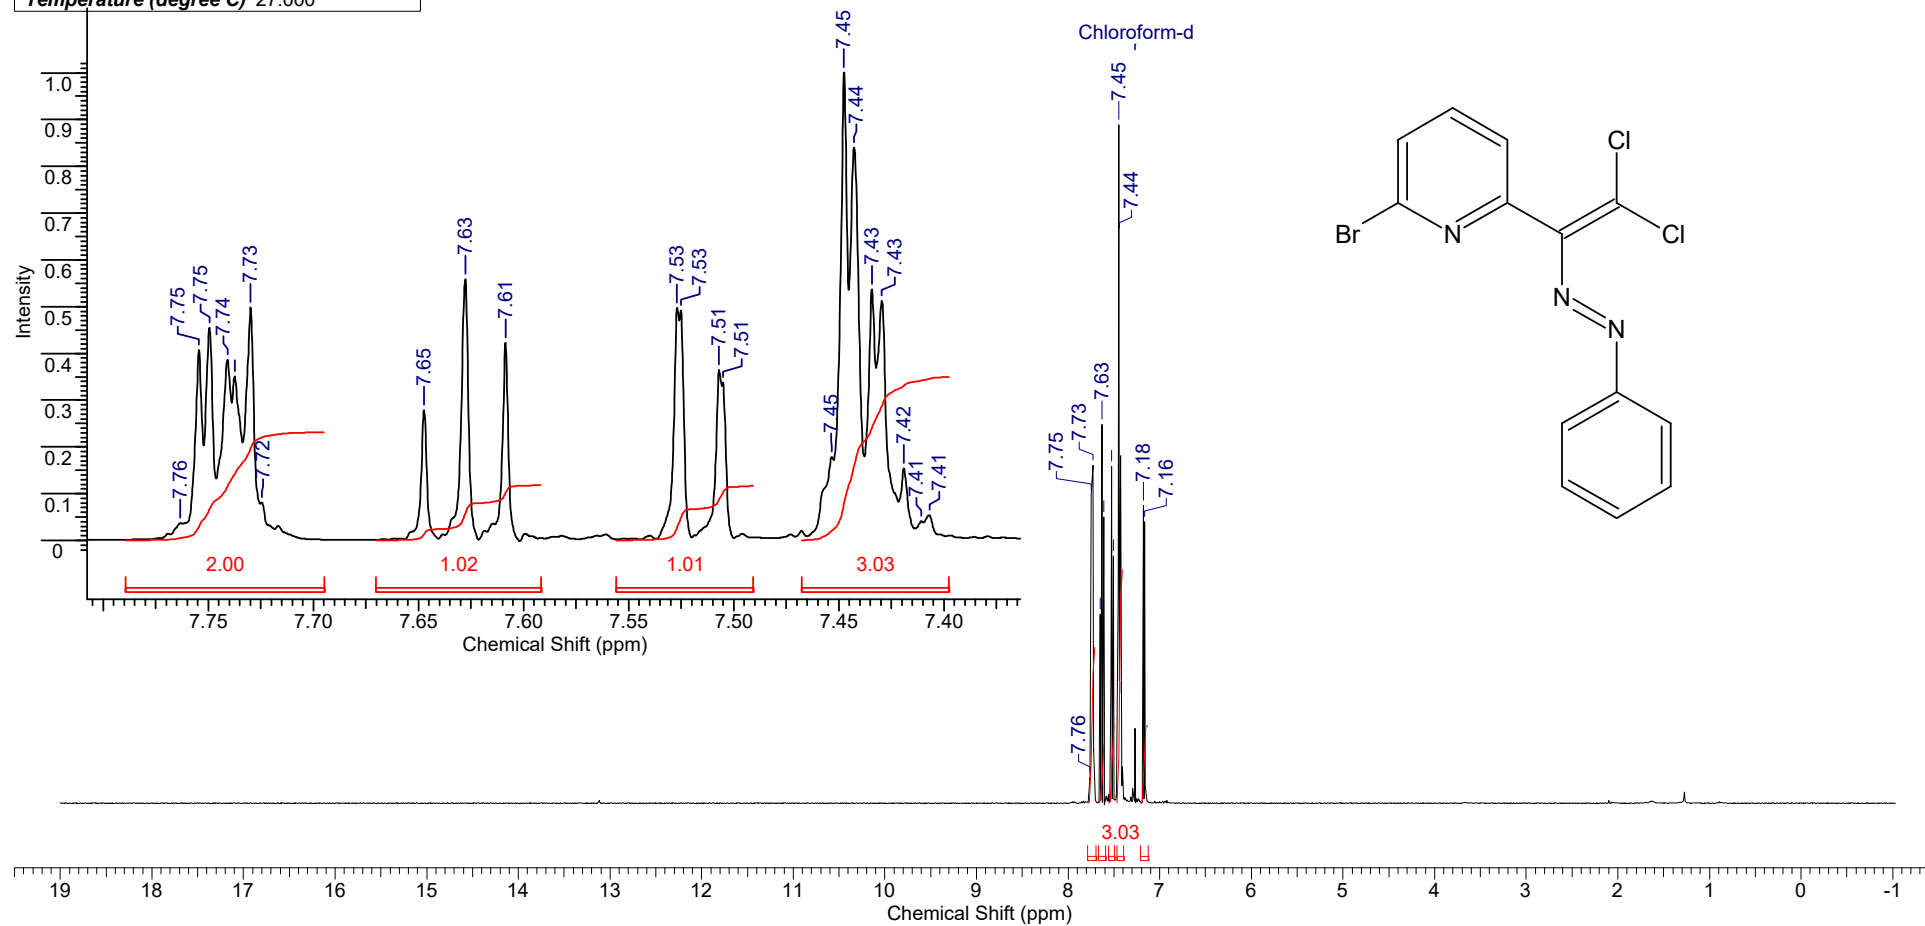

<sup>1</sup>H NMR spectrum of **1f** (400.1 MHz, CDCl<sub>3</sub>)

|                        |                 |                      |                      |                        |                      |
|------------------------|-----------------|----------------------|----------------------|------------------------|----------------------|
| Acquisition Time (sec) | 0.6783          | Comment              | Imported from UXMNR. | Date                   | 22 Jan 2021 15:32:40 |
| File Name              |                 |                      |                      | Frequency (MHz)        | 100.61               |
| Nucleus                | <sup>13</sup> C | Number of Transients | 65                   | Original Points Count  | 16384                |
| Pulse Sequence         | zgpg30          | Solvent              | CHLOROFORM-D         | Points Count           | 131072               |
|                        |                 |                      |                      | Sweep Width (Hz)       | 24154.59             |
|                        |                 |                      |                      | Temperature (degree C) | 27.000               |

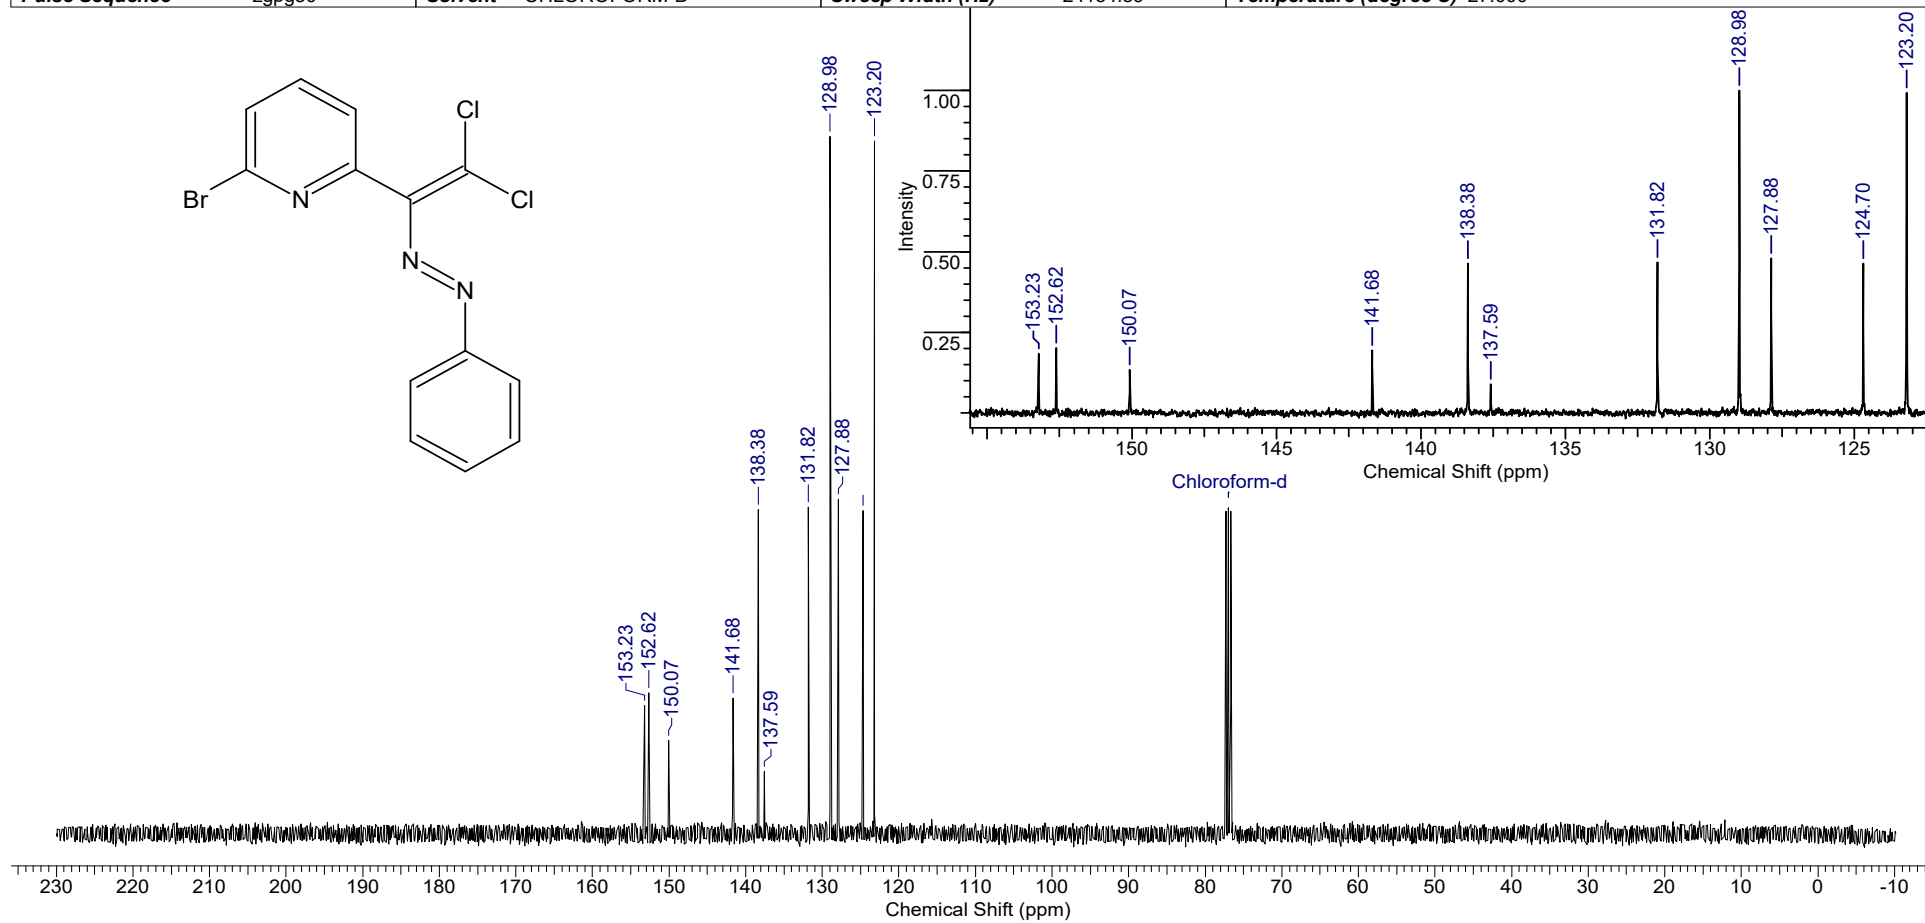

<sup>13</sup>C NMR spectrum of **1f** (100.6 MHz, CDCl<sub>3</sub>)

|                        |                |                      |                      |                       |                      |
|------------------------|----------------|----------------------|----------------------|-----------------------|----------------------|
| Acquisition Time (sec) | 4.0894         | Comment              | Imported from UXNMR. | Date                  | 04 Mar 2020 14:28:16 |
| File Name              |                |                      |                      | Frequency (MHz)       | 400.13               |
| Nucleus                | <sup>1</sup> H | Number of Transients | 4                    | Original Points Count | 32768                |
| Pulse Sequence         | zg30           | Solvent              | CHLOROFORM-D         | Points Count          | 32768                |
| Temperature (degree C) | 27.000         |                      |                      | Sweep Width (Hz)      | 8012.82              |

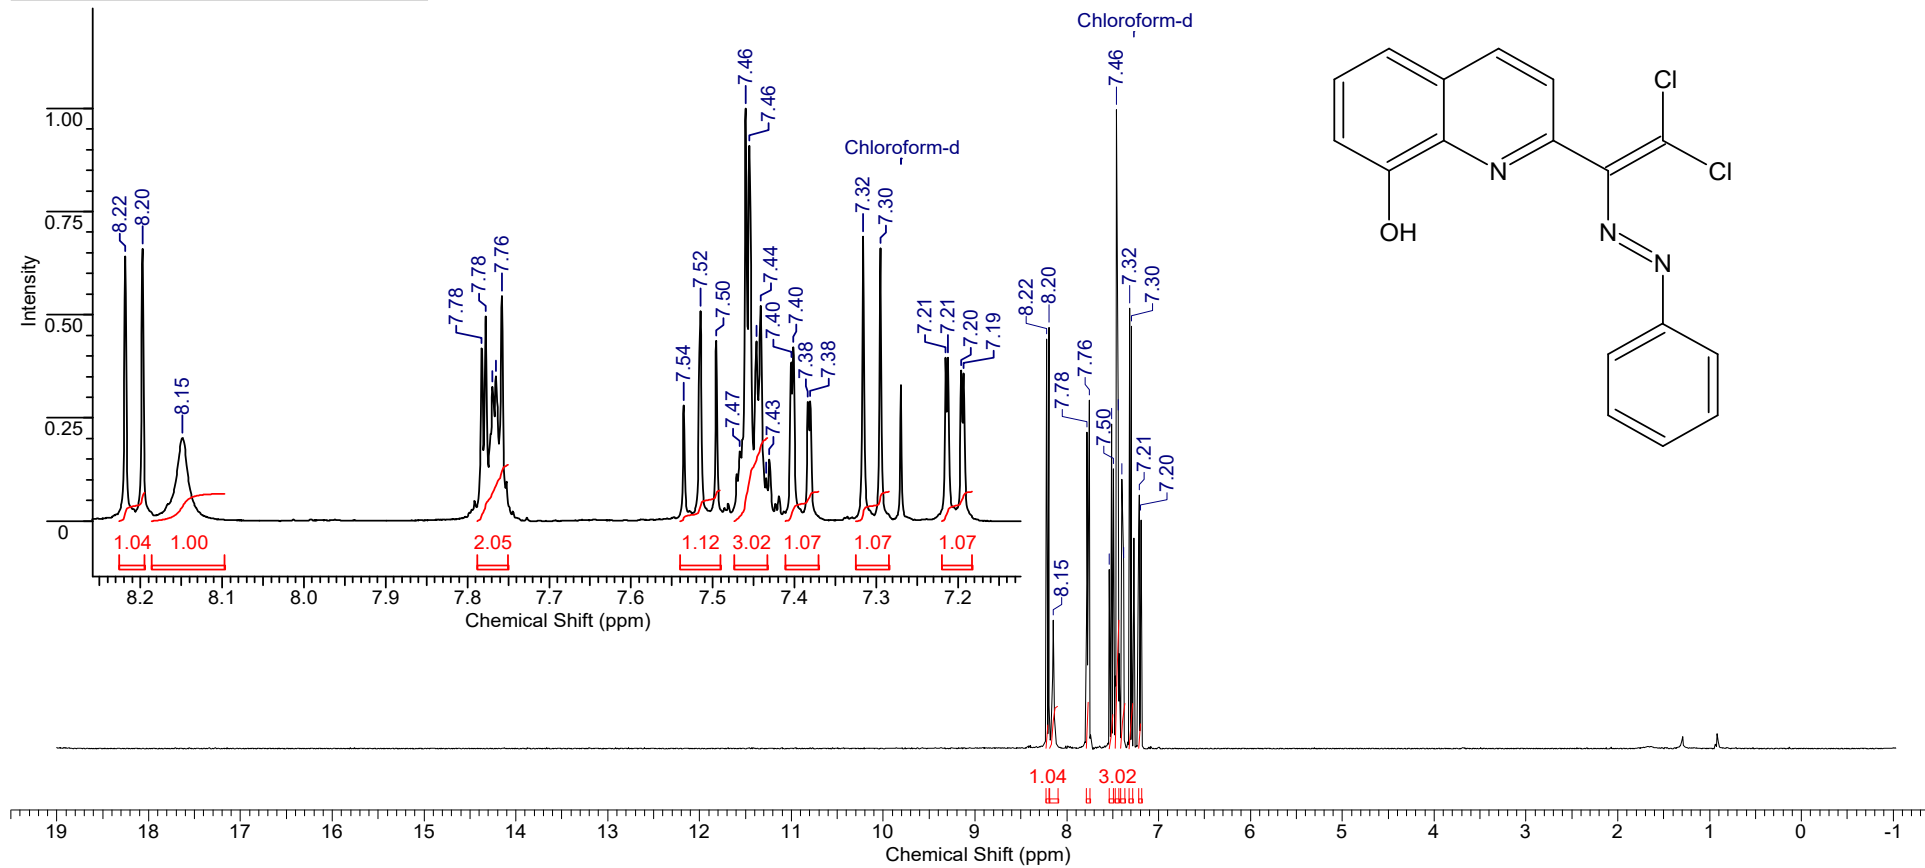

<sup>1</sup>H NMR spectrum of **1g** (400.1 MHz, CDCl<sub>3</sub>)

|                        |                 |                      |                      |                        |                      |
|------------------------|-----------------|----------------------|----------------------|------------------------|----------------------|
| Acquisition Time (sec) | 0.6783          | Comment              | Imported from UXMNR. | Date                   | 04 Mar 2020 17:32:42 |
| File Name              |                 |                      |                      | Frequency (MHz)        | 100.61               |
| Nucleus                | <sup>13</sup> C | Number of Transients | 65                   | Original Points Count  | 16384                |
| Pulse Sequence         | zgpg30          | Solvent              | CHLOROFORM-D         | Sweep Width (Hz)       | 24154.59             |
|                        |                 |                      |                      | Points Count           | 131072               |
|                        |                 |                      |                      | Temperature (degree C) | 27.000               |

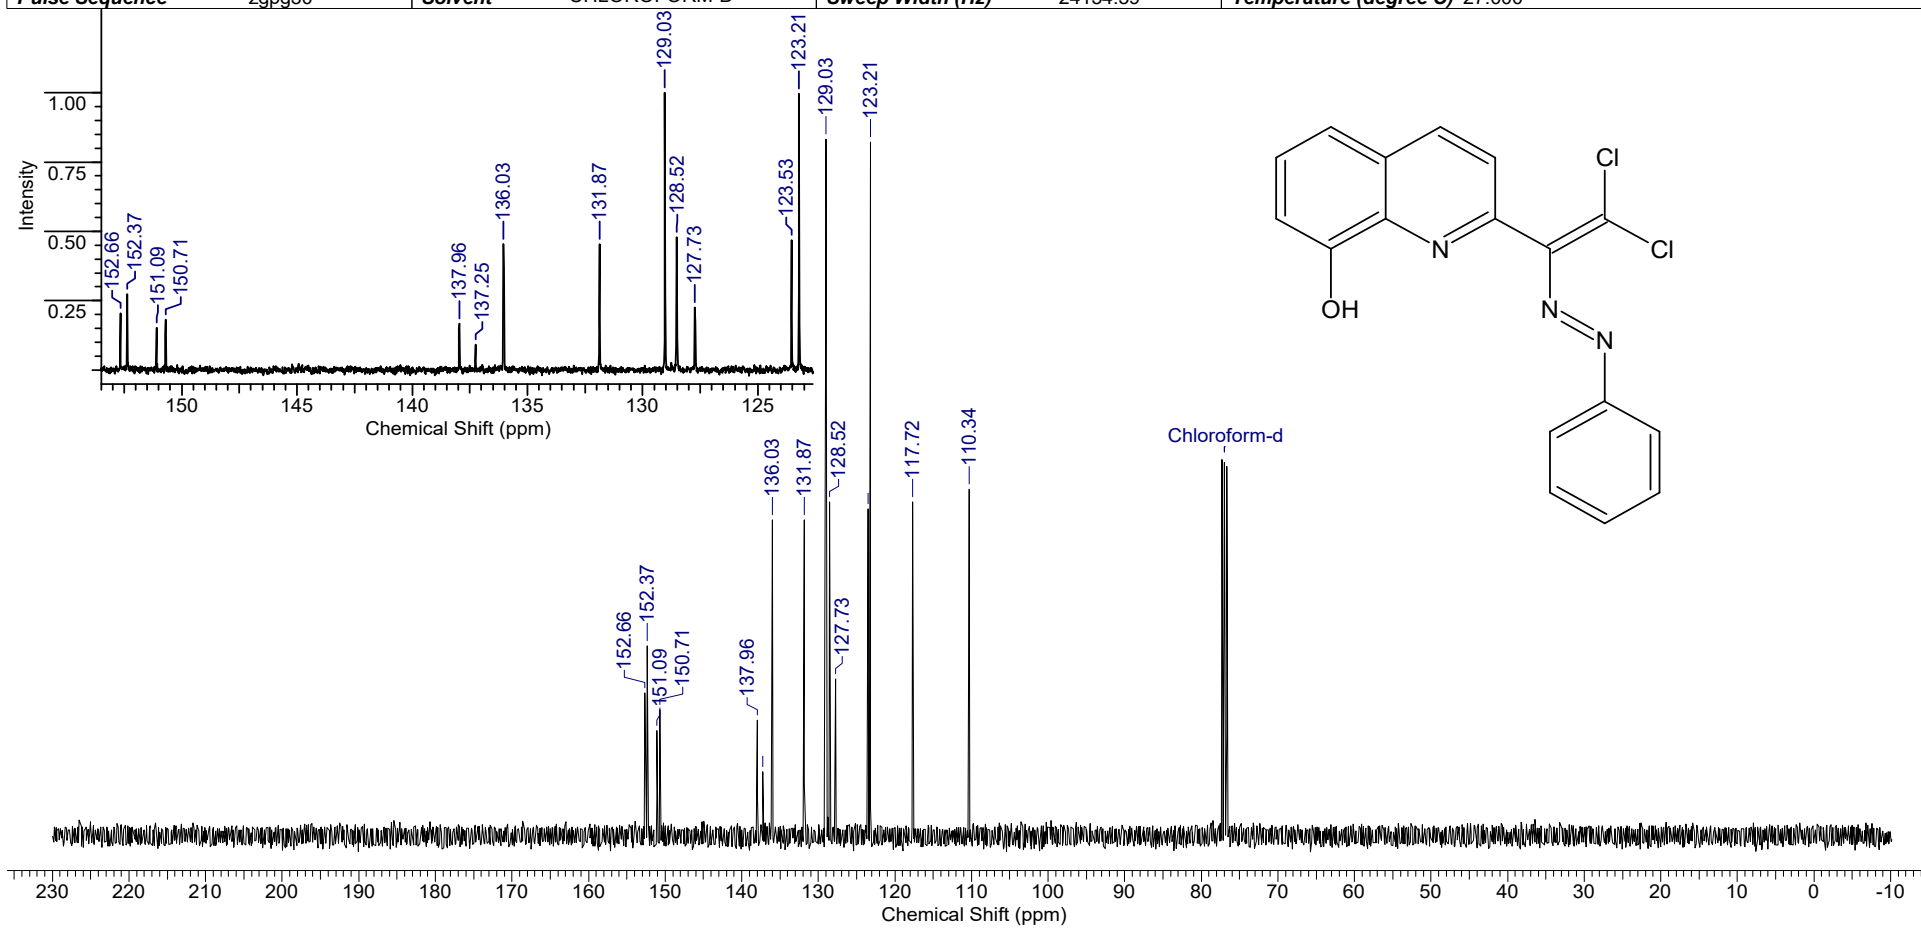<sup>13</sup>C NMR spectrum of **1g** (100.6 MHz, CDCl<sub>3</sub>)

|                        |        |                      |                      |                       |                      |
|------------------------|--------|----------------------|----------------------|-----------------------|----------------------|
| Acquisition Time (sec) | 4.0894 | Comment              | Imported from UXMNR. | Date                  | 24 Sep 2020 12:25:56 |
| File Name              |        |                      |                      | Frequency (MHz)       | 400.13               |
| Nucleus                | 1H     | Number of Transients | 4                    | Original Points Count | 32768                |
| Pulse Sequence         | zg30   | Solvent              | CHLOROFORM-D         | Points Count          | 131072               |
| Temperature (degree C) | 27.000 |                      |                      | Sweep Width (Hz)      | 8012.82              |

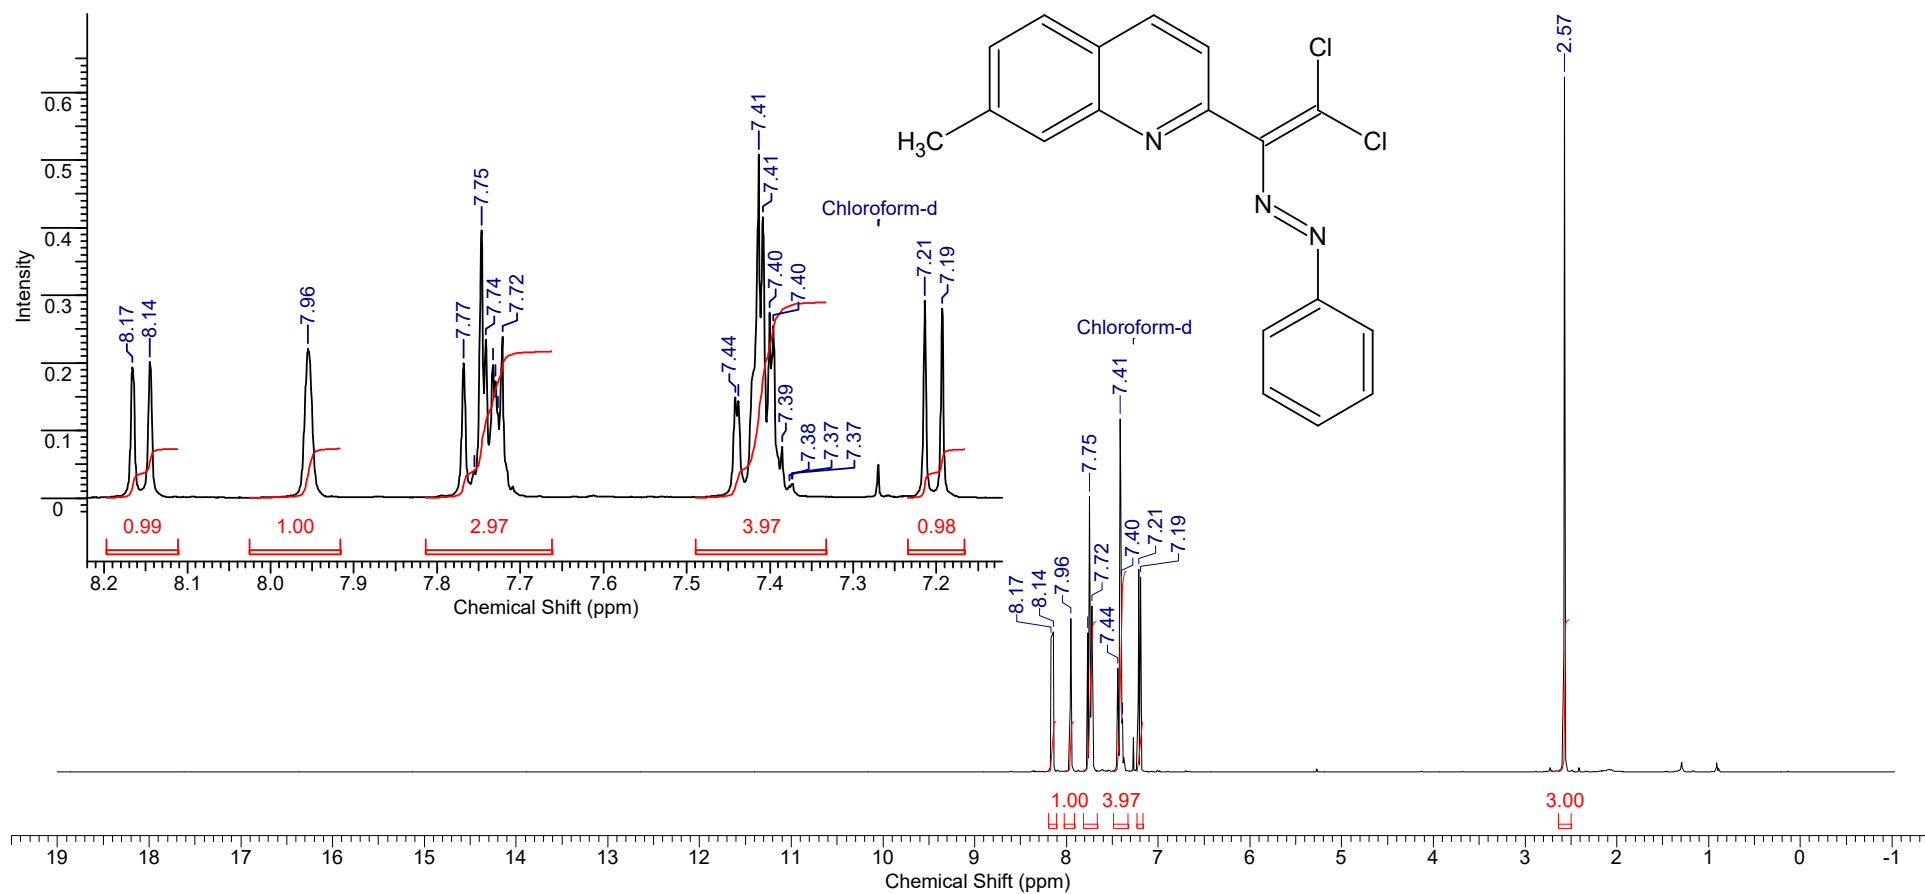<sup>1</sup>H NMR spectrum of **1h** (400.1 MHz, CDCl<sub>3</sub>)

|                        |                 |                      |                      |                       |                 |                        |        |
|------------------------|-----------------|----------------------|----------------------|-----------------------|-----------------|------------------------|--------|
| Acquisition Time (sec) | 0.6783          | Comment              | Imported from UXNMR. |                       | Date            | 24 Sep 2020 12:30:46   |        |
| File Name              |                 |                      |                      |                       | Frequency (MHz) | 100.61                 |        |
| Nucleus                | <sup>13</sup> C | Number of Transients | 65                   | Original Points Count | 16384           | Points Count           | 131072 |
| Pulse Sequence         | zgpg30          | Solvent              | CHLOROFORM-D         | Sweep Width (Hz)      | 24154.59        | Temperature (degree C) | 27.000 |

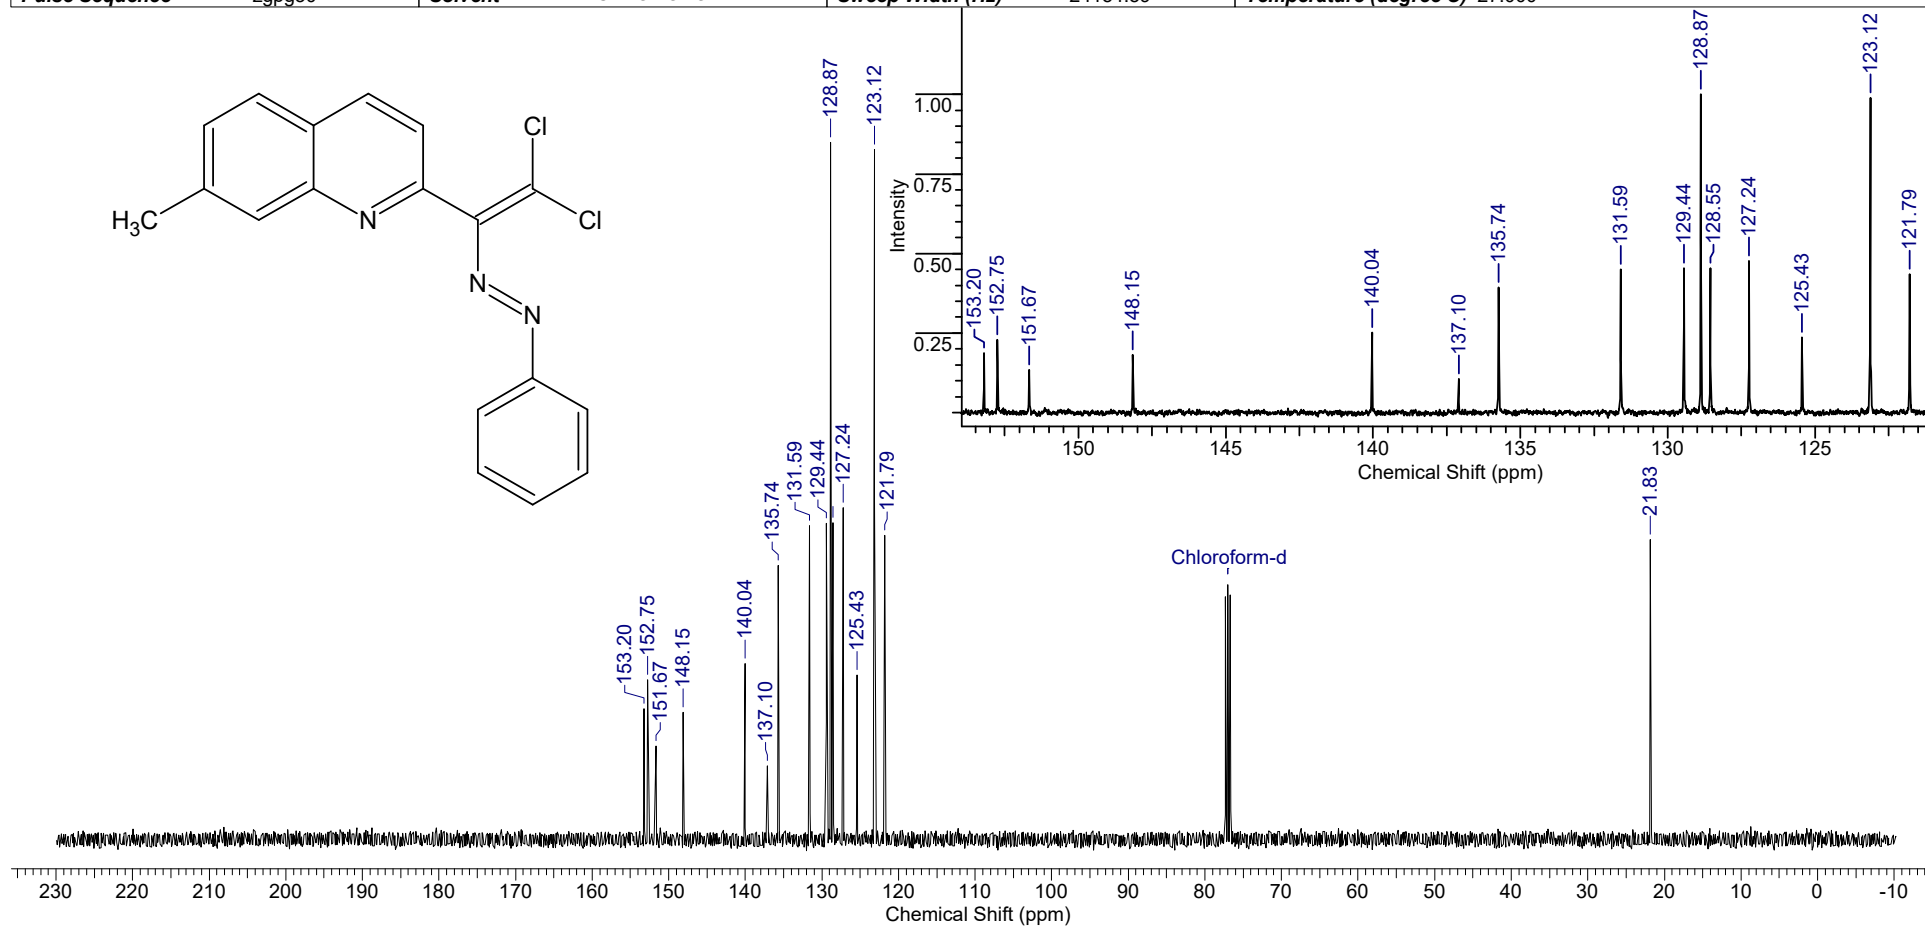

<sup>13</sup>C NMR spectrum of **1h** (100.6 MHz, CDCl<sub>3</sub>)



|                        |        |                      |                      |                       |                      |
|------------------------|--------|----------------------|----------------------|-----------------------|----------------------|
| Acquisition Time (sec) | 4.0894 | Comment              | Imported from UXNMR. | Date                  | 04 Dec 2020 13:25:48 |
| File Name              |        |                      |                      | Frequency (MHz)       | 400.13               |
| Nucleus                | 1H     | Number of Transients | 4                    | Original Points Count | 32768                |
| Pulse Sequence         | zg30   | Solvent              | CHLOROFORM-D         | Points Count          | 131072               |
| Temperature (degree C) | 27.000 |                      |                      | Sweep Width (Hz)      | 8012.82              |

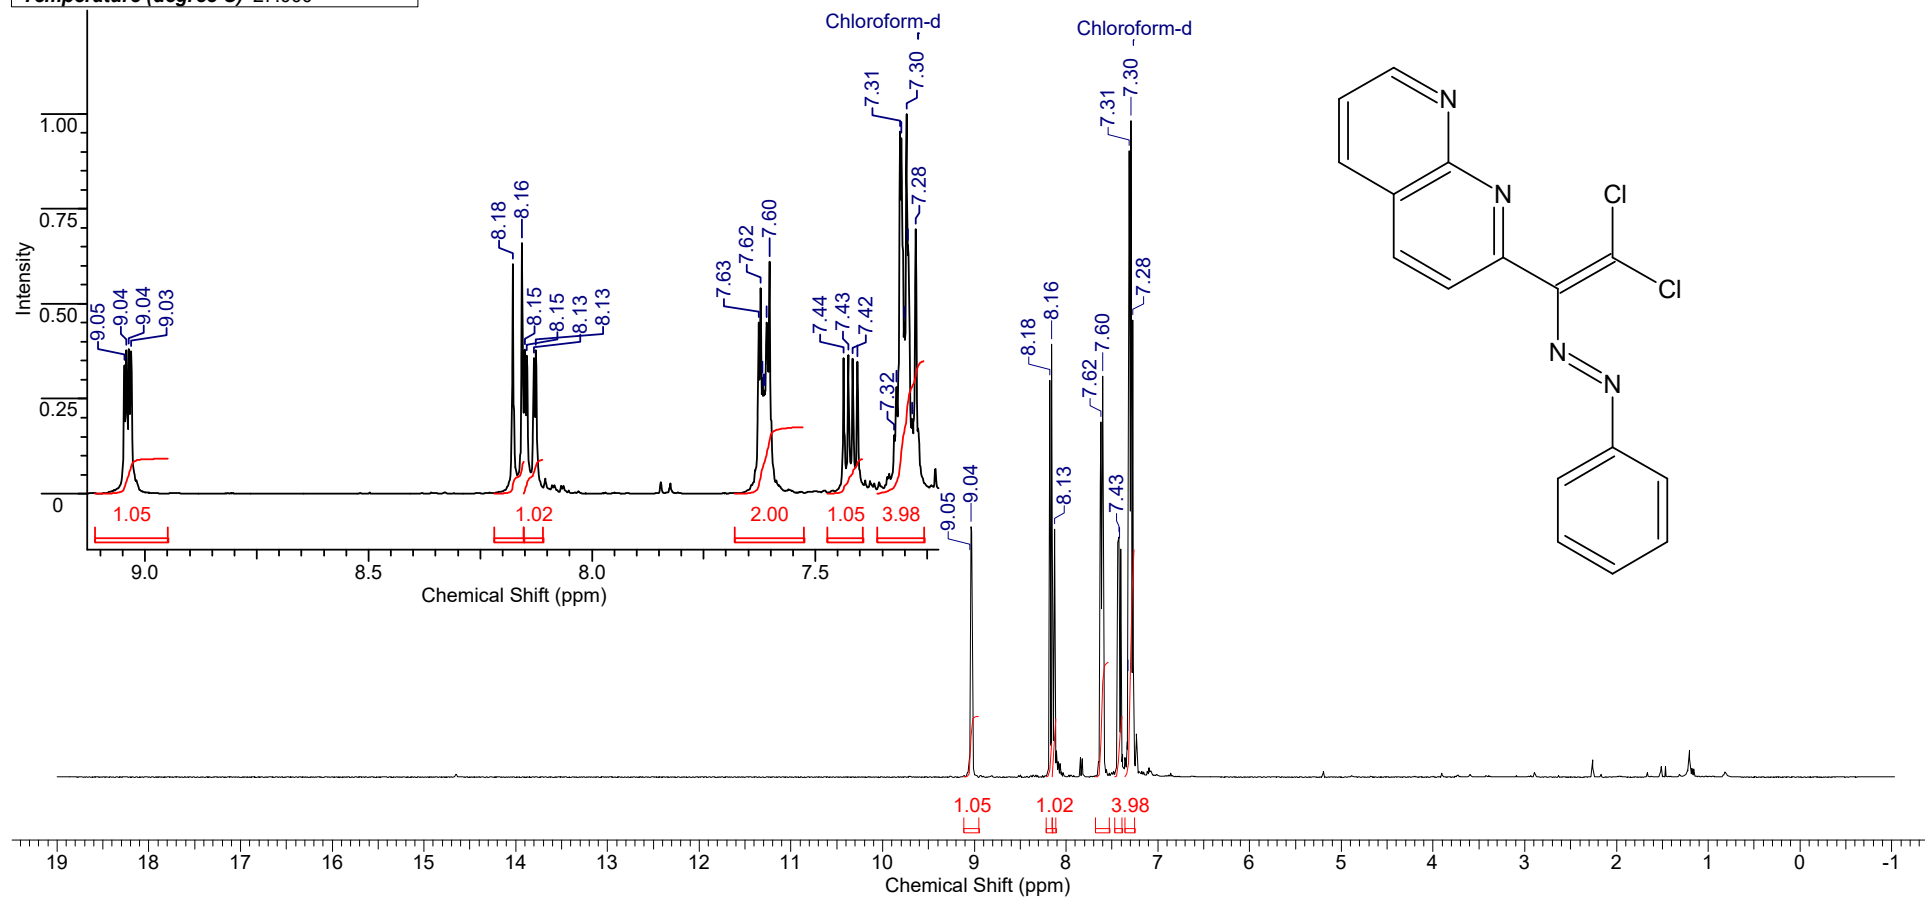

<sup>1</sup>H NMR spectrum of **1i** (400.1 MHz, CDCl<sub>3</sub>)



|                               |                      |                               |                                    |                             |                      |
|-------------------------------|----------------------|-------------------------------|------------------------------------|-----------------------------|----------------------|
| <b>Acquisition Time (sec)</b> | 4.0894               | <b>Comment</b>                | 5 mm QNP 1H/13C/31P/19F Z3182/0165 | <b>Date</b>                 | 25 Feb 2020 09:25:20 |
| <b>Date Stamp</b>             | 25 Feb 2020 09:25:20 |                               |                                    |                             |                      |
| <b>File Name</b>              | BIL-461-3-H.esp      |                               |                                    | <b>Frequency (MHz)</b>      | 400.13               |
| <b>Nucleus</b>                | 1H                   | <b>Number of Transients</b>   | 4                                  | <b>Origin</b>               | spect                |
| <b>Owner</b>                  | root                 | <b>Points Count</b>           | 131072                             | <b>Pulse Sequence</b>       | zg30                 |
| <b>SW(cyclical) (Hz)</b>      | 8012.82              | <b>Solvent</b>                | CHLOROFORM-d                       | <b>Receiver Gain</b>        | 812.70               |
| <b>Sweep Width (Hz)</b>       | 8012.76              | <b>Temperature (degree C)</b> | 27.000                             | <b>Spectrum Offset (Hz)</b> | 3595.9880            |

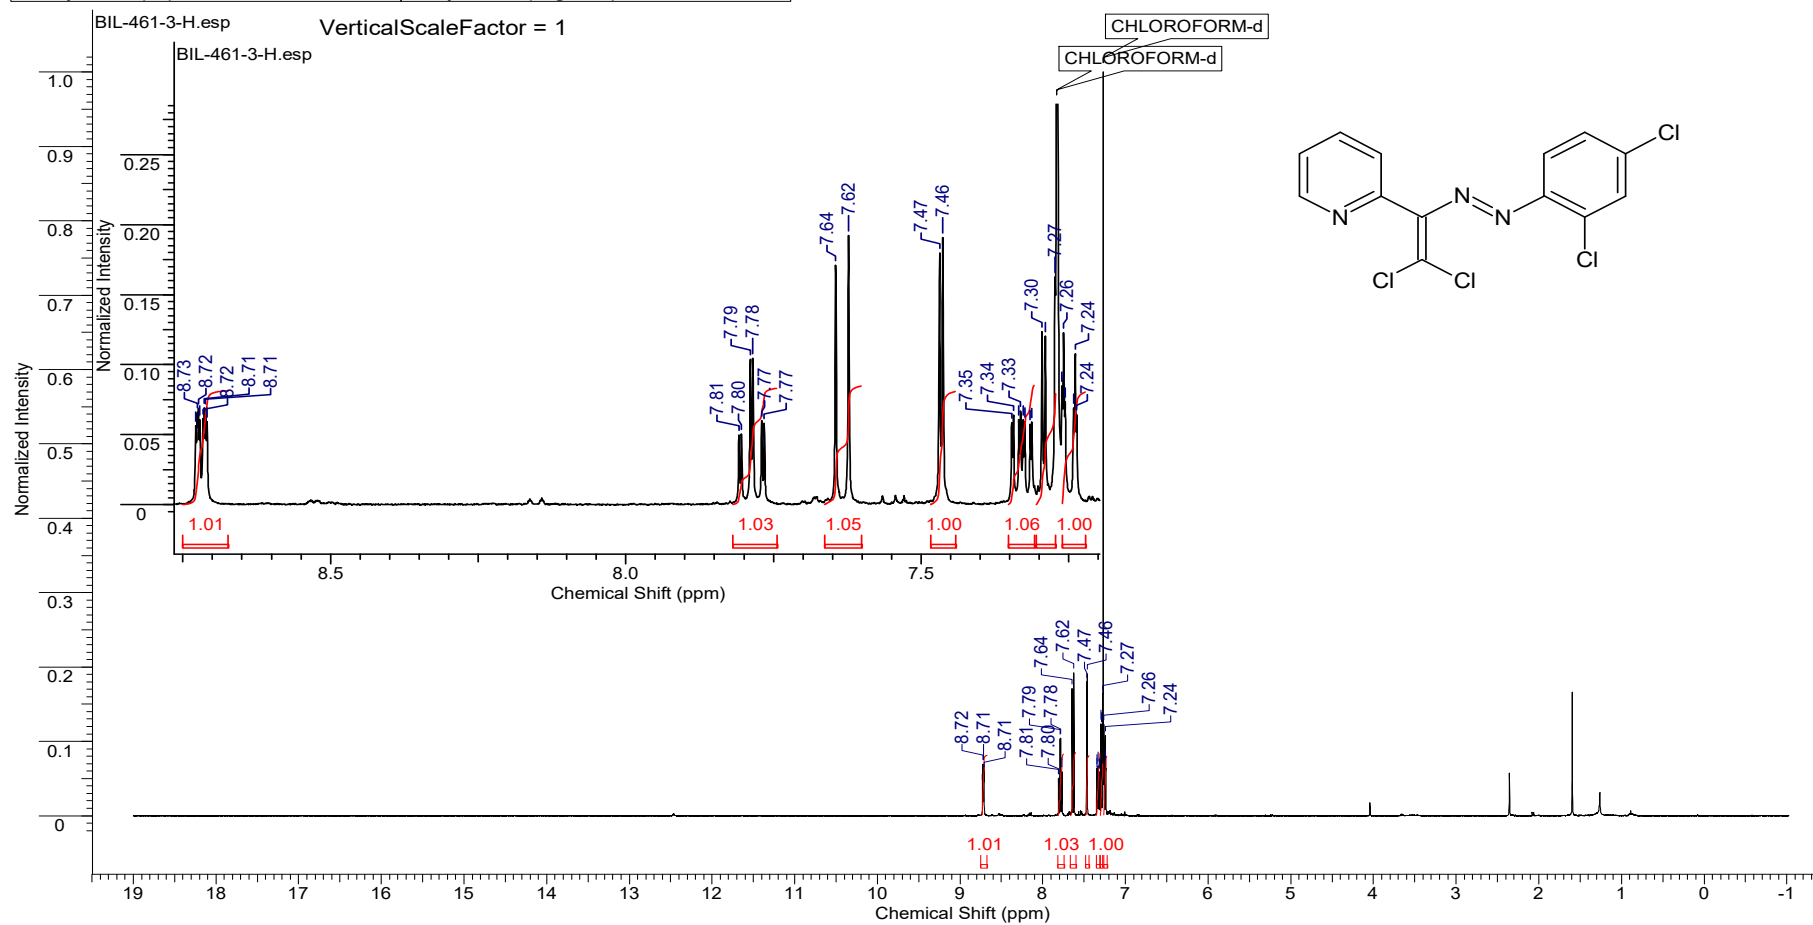<sup>1</sup>H NMR spectrum of **1j** (400.1 MHz, CDCl<sub>3</sub>)

|                               |                      |                             |                                    |                             |                        |                              |          |
|-------------------------------|----------------------|-----------------------------|------------------------------------|-----------------------------|------------------------|------------------------------|----------|
| <b>Acquisition Time (sec)</b> | 0.6783               | <b>Comment</b>              | 5 mm QNP 1H/13C/31P/19F Z3182/0165 | <b>Date</b>                 | 25 Feb 2020 09:27:28   |                              |          |
| <b>Date Stamp</b>             | 25 Feb 2020 09:27:28 |                             |                                    |                             |                        |                              |          |
| <b>File Name</b>              |                      |                             |                                    |                             | <b>Frequency (MHz)</b> | 100.61                       |          |
| <b>Nucleus</b>                | 13C                  | <b>Number of Transients</b> | 3005                               | <b>Origin</b>               | spect                  | <b>Original Points Count</b> | 16384    |
| <b>Owner</b>                  | root                 | <b>Points Count</b>         | 131072                             | <b>Pulse Sequence</b>       | zgpg30                 | <b>Receiver Gain</b>         | 14596.50 |
| <b>SW(cyclical) (Hz)</b>      | 24154.59             | <b>Solvent</b>              | CHLOROFORM-d                       | <b>Spectrum Offset (Hz)</b> | 11064.7754             | <b>Sweep Width (Hz)</b>      | 24154.41 |
| <b>Temperature (degree C)</b> | 27.000               |                             |                                    |                             |                        |                              |          |

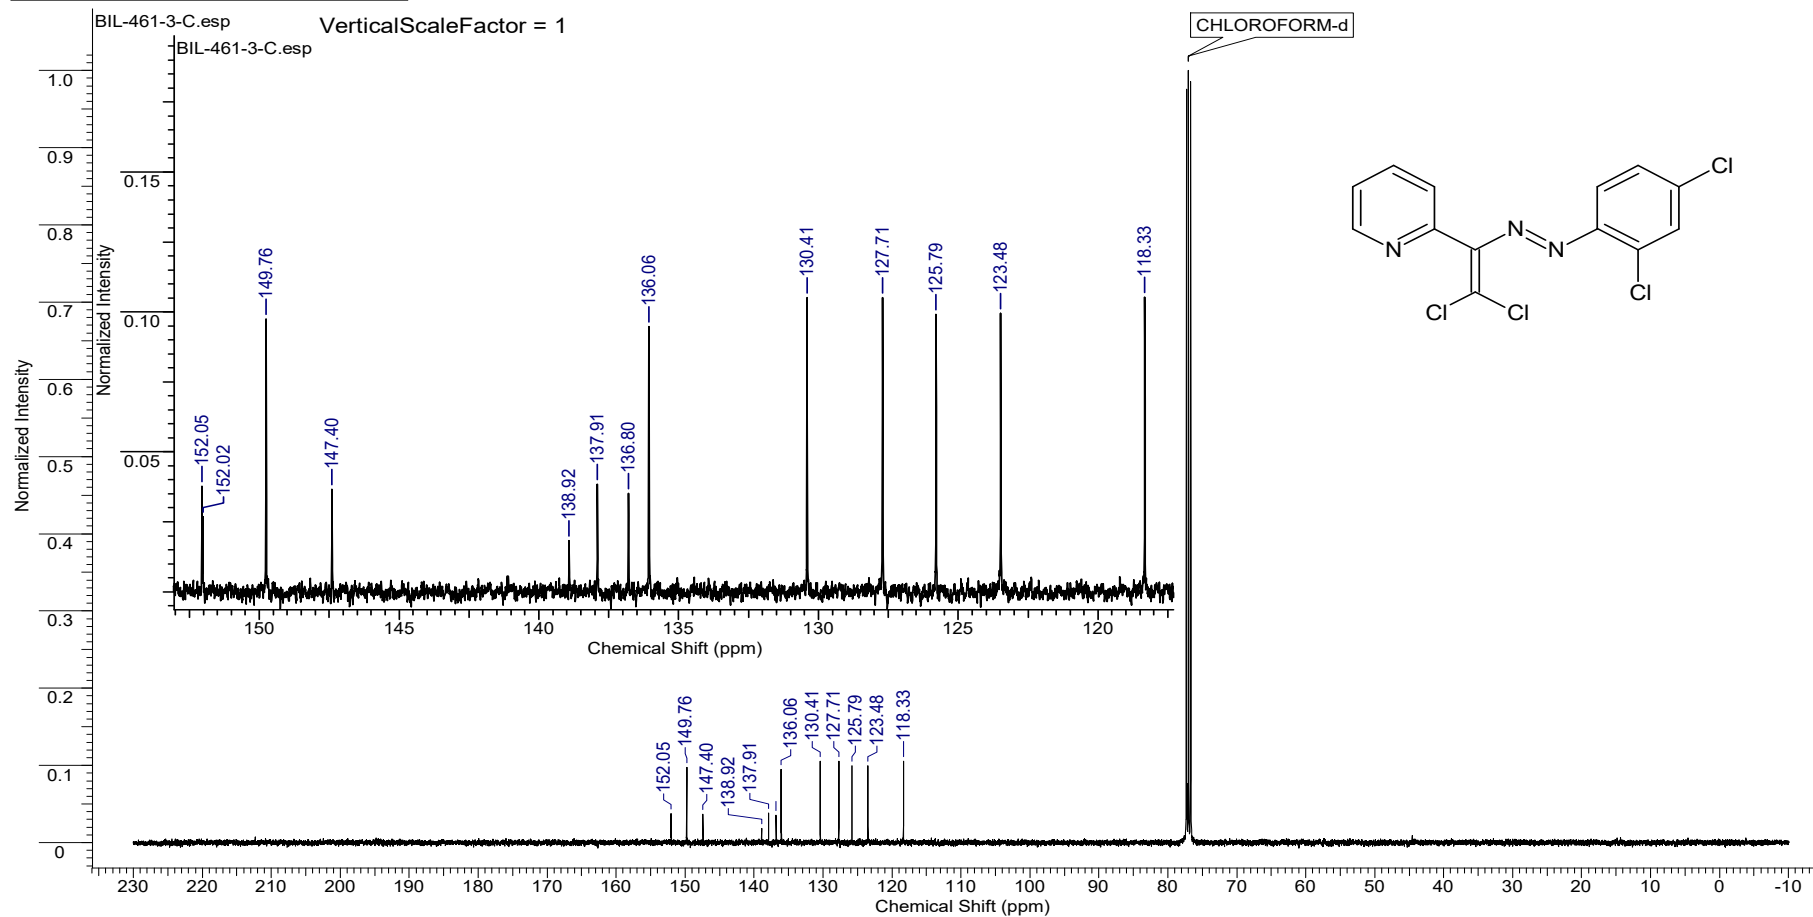 $^{13}\text{C}$  NMR spectrum of **1j** (100.6 MHz,  $\text{CDCl}_3$ )

|                               |        |                               |                      |                              |                         |                        |        |
|-------------------------------|--------|-------------------------------|----------------------|------------------------------|-------------------------|------------------------|--------|
| <b>Acquisition Time (sec)</b> | 4.0894 | <b>Comment</b>                | Imported from UXNMR. |                              | <b>Date</b>             | 06 Feb 2021 13:22:14   |        |
| <b>File Name</b>              |        | <b>Number of Transients</b>   | 4                    | <b>Original Points Count</b> | 32768                   | <b>Frequency (MHz)</b> | 400.13 |
| <b>Nucleus</b>                | 1H     | <b>Solvent</b>                | CHLOROFORM-D         |                              | <b>Points Count</b>     | 131072                 |        |
| <b>Pulse Sequence</b>         | zg30   | <b>Temperature (degree C)</b> | 27.000               |                              | <b>Sweep Width (Hz)</b> | 8012.82                |        |

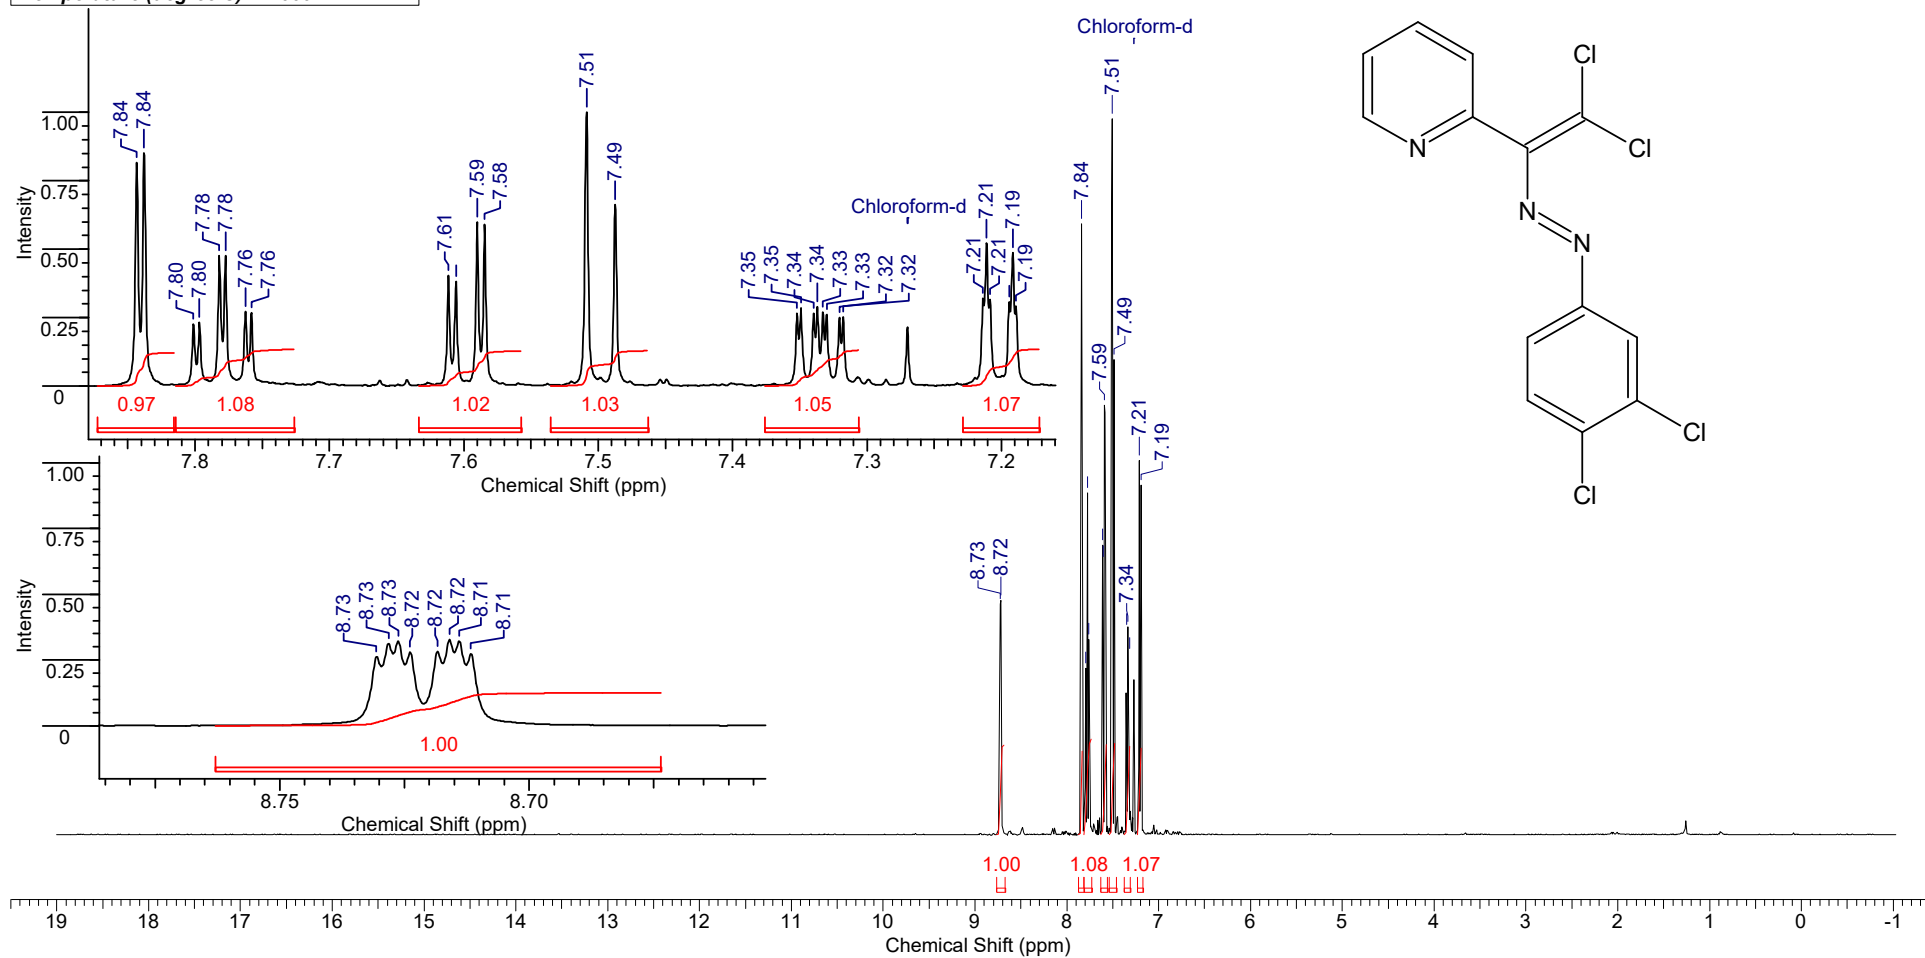<sup>1</sup>H NMR spectrum of **1k** (400.1 MHz, CDCl<sub>3</sub>)

|                        |        |                      |                      |                       |                 |                        |        |
|------------------------|--------|----------------------|----------------------|-----------------------|-----------------|------------------------|--------|
| Acquisition Time (sec) | 0.6783 | Comment              | Imported from UXMNR. |                       | Date            | 06 Feb 2021 13:26:58   |        |
| File Name              |        |                      |                      |                       | Frequency (MHz) | 100.61                 |        |
| Nucleus                | 13C    | Number of Transients | 65                   | Original Points Count | 16384           | Points Count           | 131072 |
| Pulse Sequence         | zgpg30 | Solvent              | CHLOROFORM-D         | Sweep Width (Hz)      | 24154.59        | Temperature (degree C) | 27.000 |

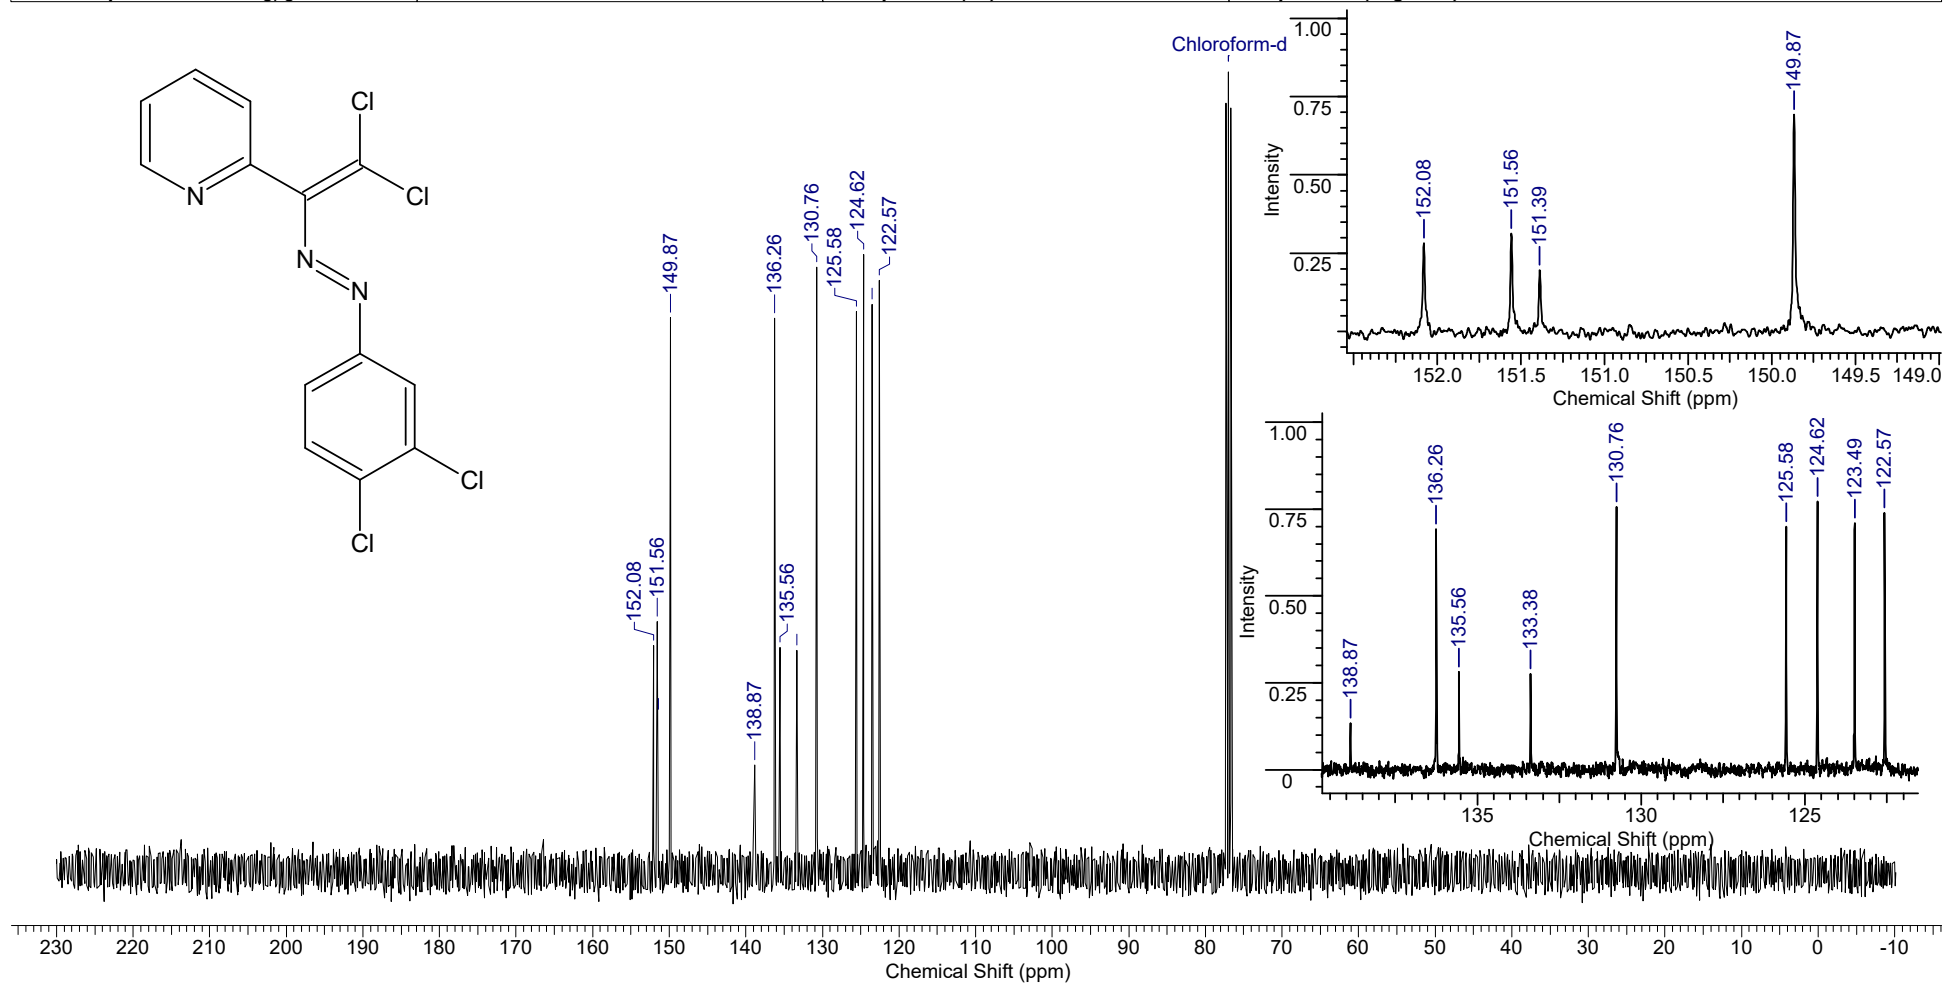<sup>13</sup>C NMR spectrum of **1k** (100.6 MHz, CDCl<sub>3</sub>)

|                        |        |                      |                      |                       |                      |
|------------------------|--------|----------------------|----------------------|-----------------------|----------------------|
| Acquisition Time (sec) | 4.0894 | Comment              | Imported from UXNMR. | Date                  | 19 Feb 2020 17:28:50 |
| File Name              |        |                      |                      | Frequency (MHz)       | 400.13               |
| Nucleus                | 1H     | Number of Transients | 4                    | Original Points Count | 32768                |
| Pulse Sequence         | zg30   | Solvent              | CHLOROFORM-D         | Points Count          | 131072               |
| Temperature (degree C) | 27.000 |                      |                      | Sweep Width (Hz)      | 8012.82              |

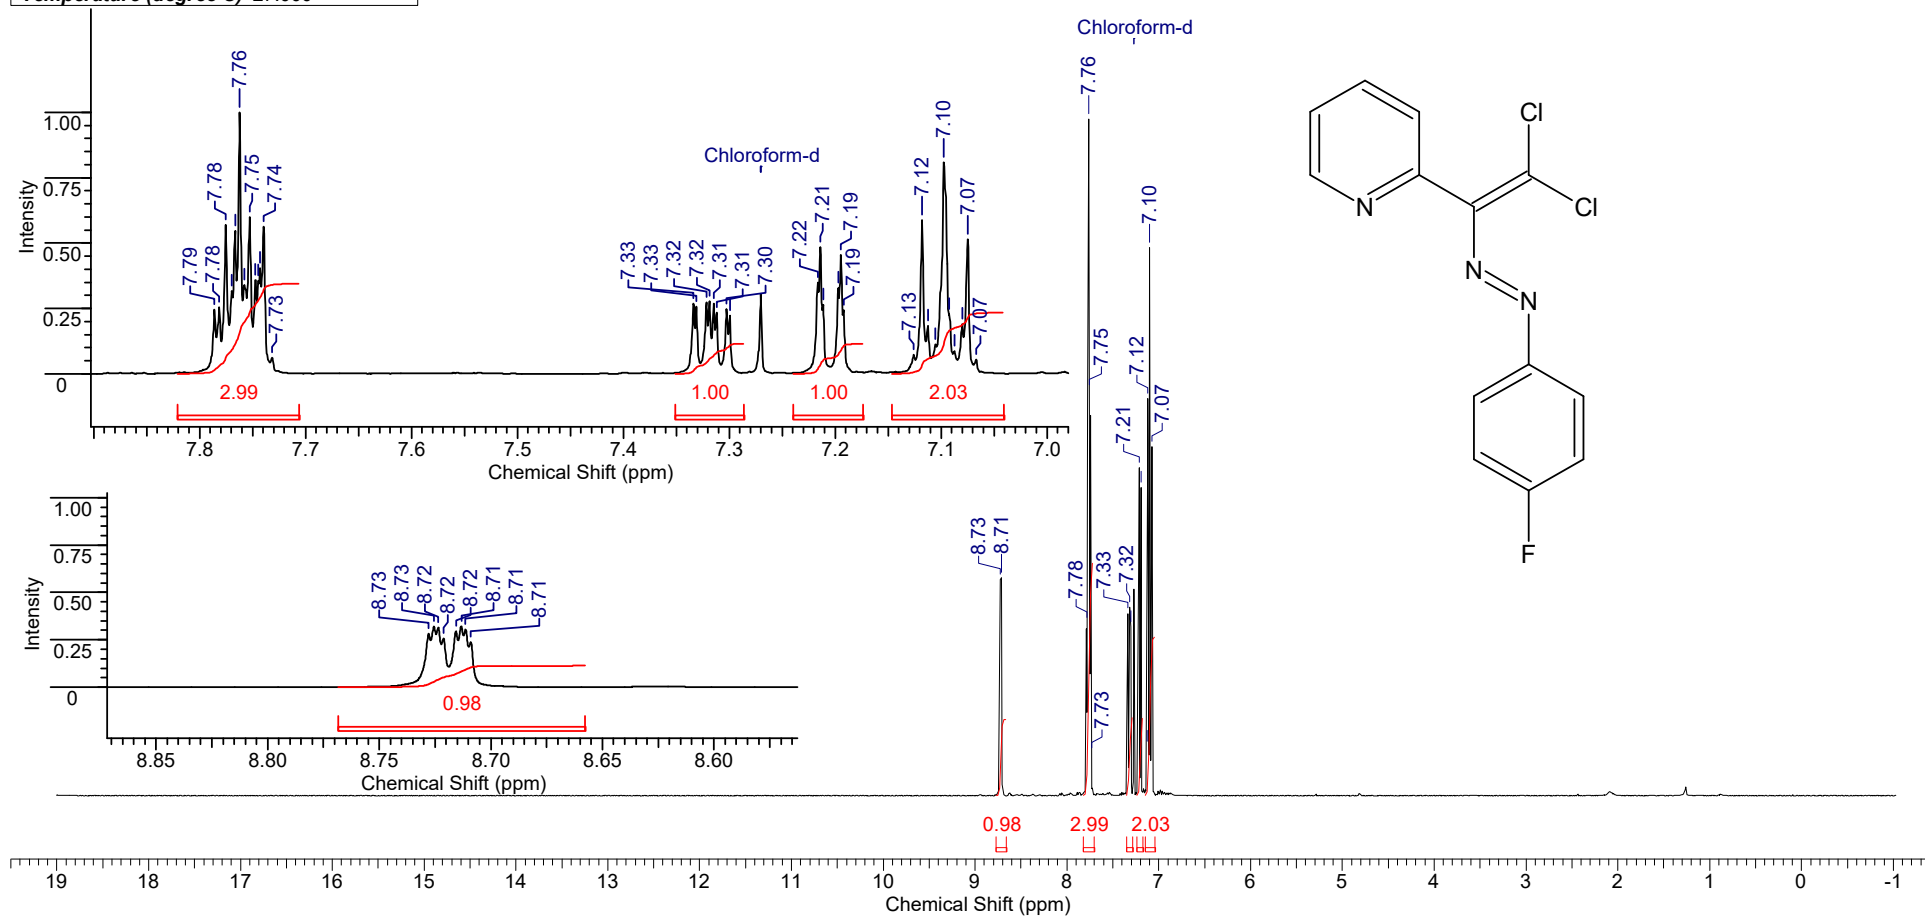 $^1\text{H}$  NMR spectrum of **11** (400.1 MHz,  $\text{CDCl}_3$ )

|                               |                 |                             |                      |                              |                        |                               |        |
|-------------------------------|-----------------|-----------------------------|----------------------|------------------------------|------------------------|-------------------------------|--------|
| <b>Acquisition Time (sec)</b> | 0.6783          | <b>Comment</b>              | Imported from UXMNR. |                              | <b>Date</b>            | 19 Feb 2020 17:33:06          |        |
| <b>File Name</b>              |                 |                             |                      |                              | <b>Frequency (MHz)</b> | 100.61                        |        |
| <b>Nucleus</b>                | <sup>13</sup> C | <b>Number of Transients</b> | 98                   | <b>Original Points Count</b> | 16384                  | <b>Points Count</b>           | 131072 |
| <b>Pulse Sequence</b>         | zgpg30          | <b>Solvent</b>              | CHLOROFORM-D         | <b>Sweep Width (Hz)</b>      | 24154.59               | <b>Temperature (degree C)</b> | 27.000 |

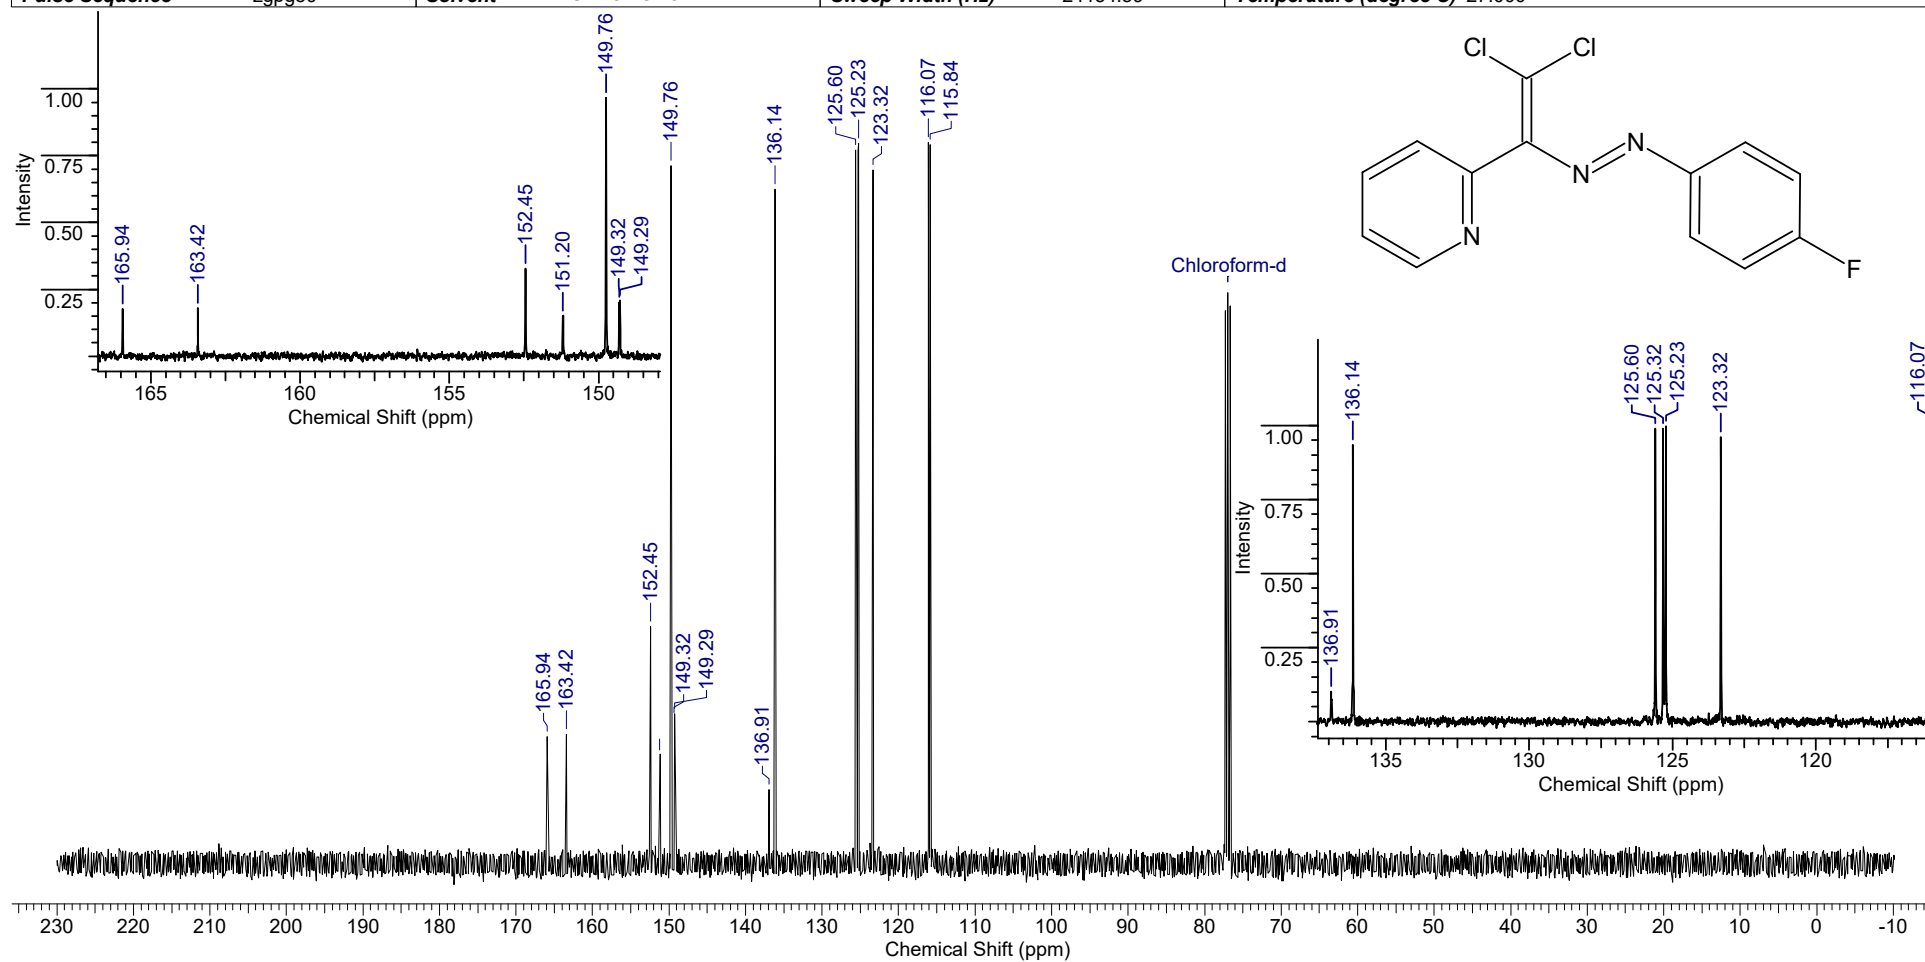

<sup>13</sup>C NMR spectrum of **11** (100.6 MHz, CDCl<sub>3</sub>)



|                        |        |                      |              |                       |           |              |        |
|------------------------|--------|----------------------|--------------|-----------------------|-----------|--------------|--------|
| Acquisition Time (sec) | 1.5729 | Date                 | Feb 20 2020  |                       |           |              |        |
| File Name              |        | Frequency (MHz)      | 376.31       |                       |           |              |        |
| Nucleus                | 19F    | Number of Transients | 8            | Original Points Count | 206956    | Points Count | 262144 |
| Pulse Sequence         | s2pul  | Solvent              | CHLOROFORM-D | Sweep Width (Hz)      | 131578.95 |              |        |
| Temperature (degree C) | 22.000 |                      |              |                       |           |              |        |

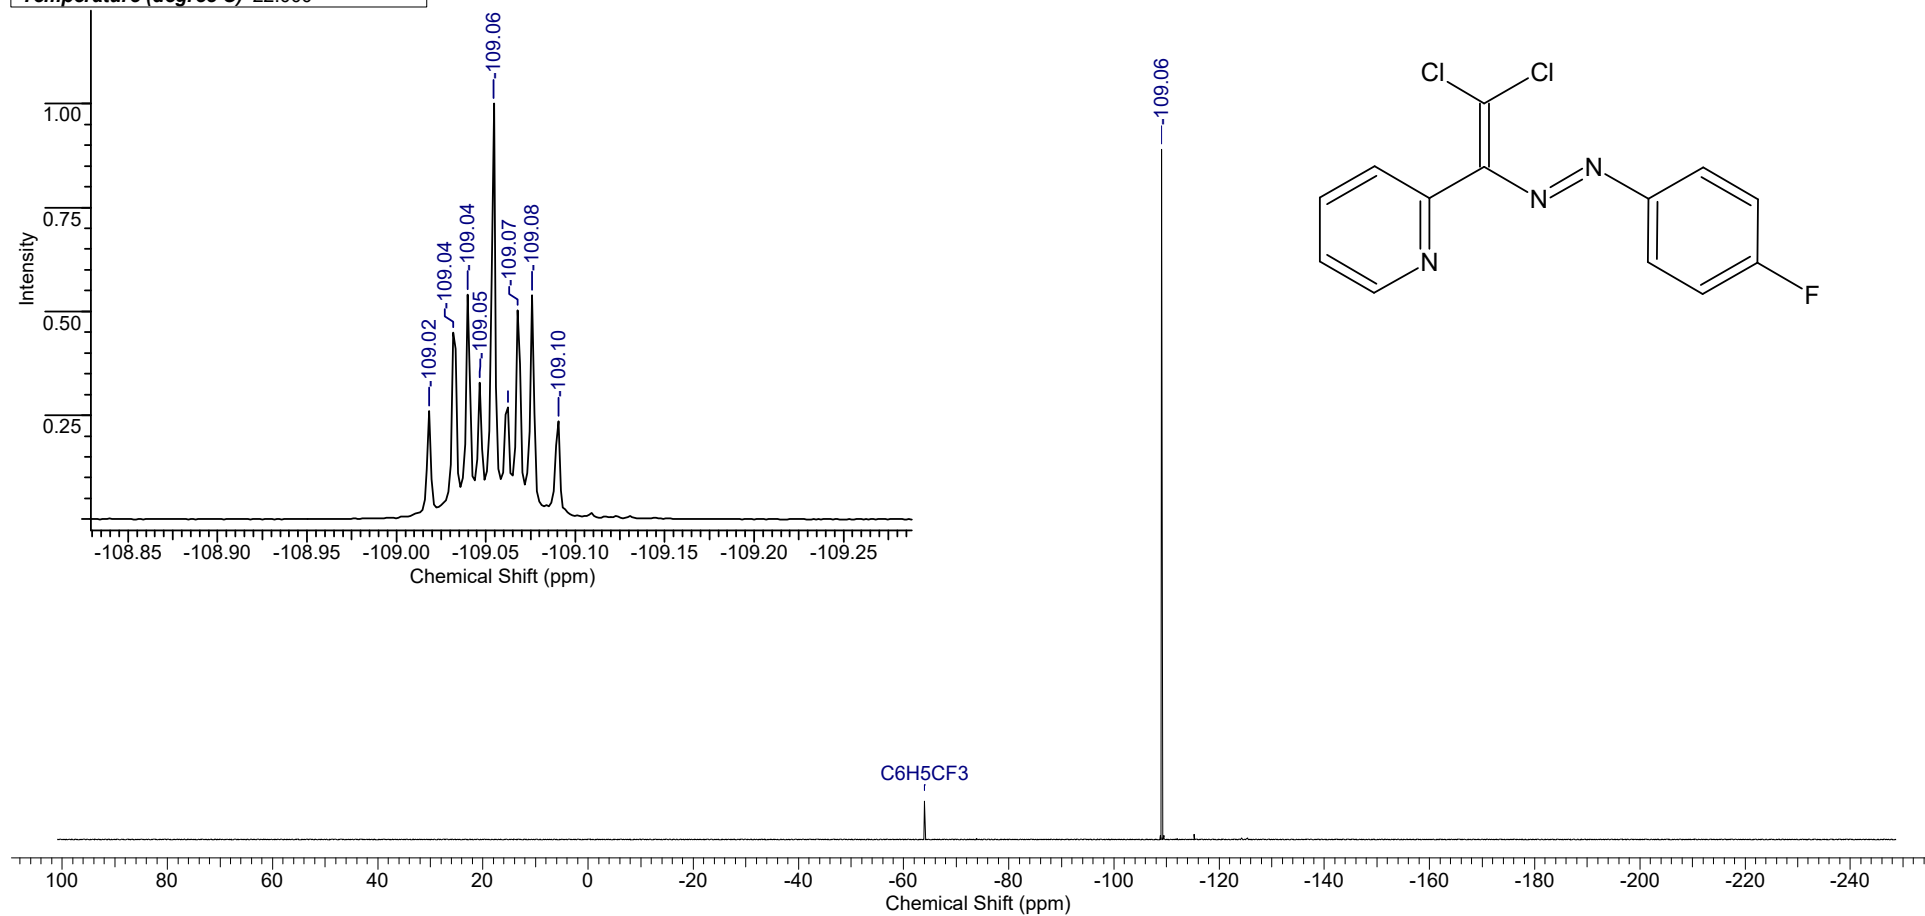

$^{19}\text{F}$  NMR spectrum of **II** (376.5 MHz,  $\text{CDCl}_3$ )

|                        |                |                      |                      |                       |                  |                      |        |
|------------------------|----------------|----------------------|----------------------|-----------------------|------------------|----------------------|--------|
| Acquisition Time (sec) | 4.0894         | Comment              | Imported from UXNMR. |                       | Date             | 28 Jan 2021 11:57:26 |        |
| File Name              |                |                      |                      |                       | Frequency (MHz)  | 400.13               |        |
| Nucleus                | <sup>1</sup> H | Number of Transients | 4                    | Original Points Count | 32768            | Points Count         | 131072 |
| Pulse Sequence         | zg30           | Solvent              | CHLOROFORM-D         |                       | Sweep Width (Hz) | 8012.82              |        |
| Temperature (degree C) | 27.000         |                      |                      |                       |                  |                      |        |

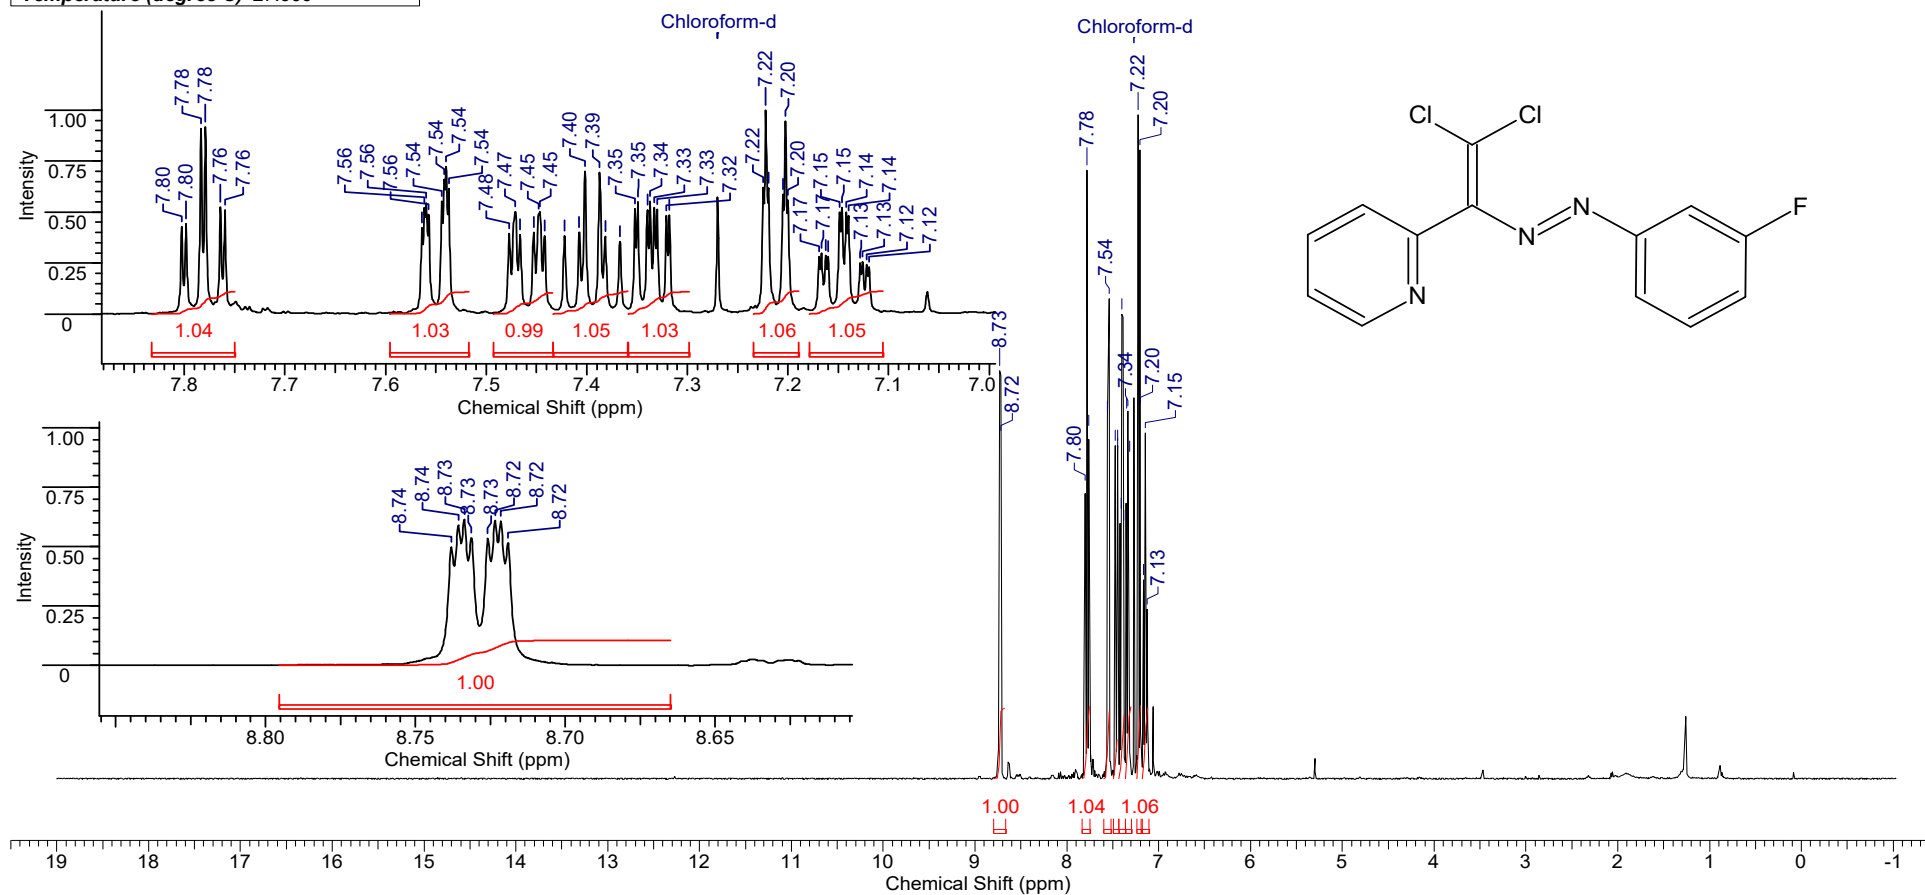<sup>1</sup>H NMR spectrum of **1m** (400.1 MHz, CDCl<sub>3</sub>)

|                               |        |                             |                       |                              |                        |                               |        |
|-------------------------------|--------|-----------------------------|-----------------------|------------------------------|------------------------|-------------------------------|--------|
| <b>Acquisition Time (sec)</b> | 0.6783 | <b>Comment</b>              | Imported from UJXNMR. |                              | <b>Date</b>            | 28 Jan 2021 12:03:34          |        |
| <b>File Name</b>              |        |                             |                       |                              | <b>Frequency (MHz)</b> | 100.61                        |        |
| <b>Nucleus</b>                | 13C    | <b>Number of Transients</b> | 137                   | <b>Original Points Count</b> | 16384                  | <b>Points Count</b>           | 131072 |
| <b>Pulse Sequence</b>         | zgpg30 | <b>Solvent</b>              | CHLOROFORM-D          | <b>Sweep Width (Hz)</b>      | 24154.59               | <b>Temperature (degree C)</b> | 27.000 |

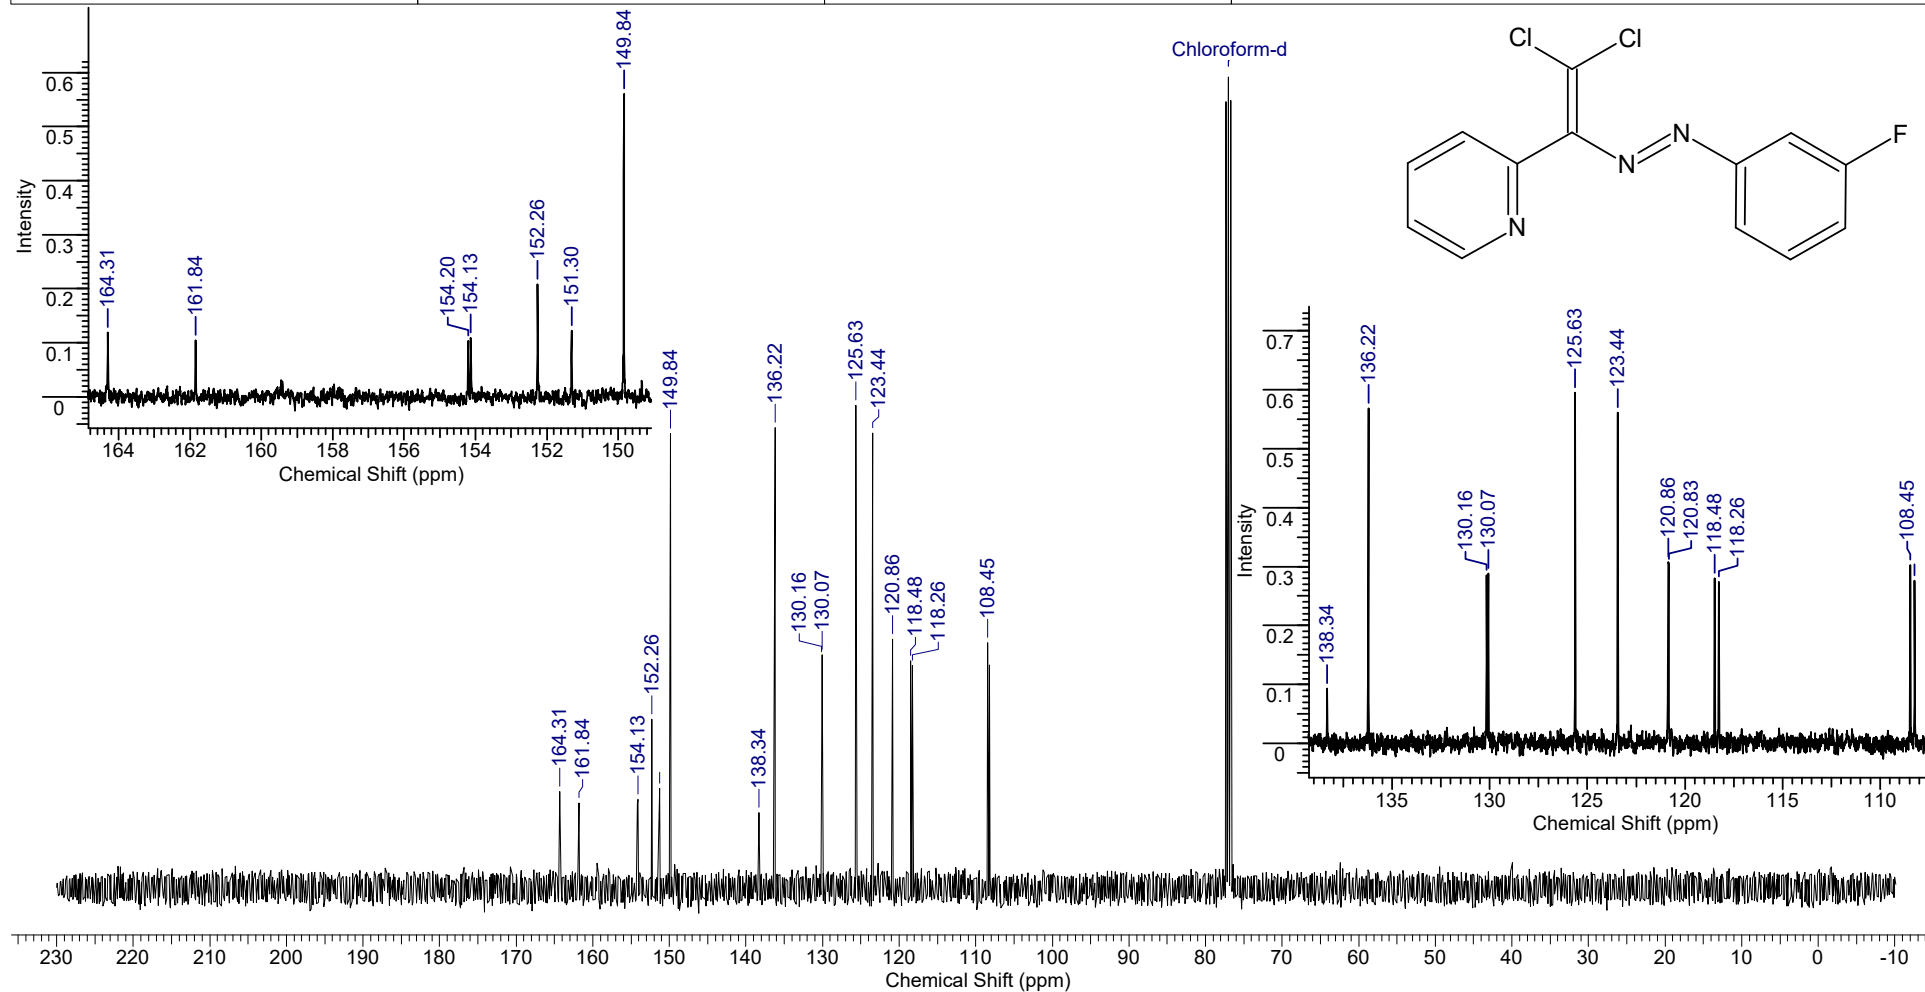

$^{13}\text{C}$  NMR spectrum of **1m** (100.6 MHz,  $\text{CDCl}_3$ )

|                               |        |                             |                      |                              |                         |                      |        |
|-------------------------------|--------|-----------------------------|----------------------|------------------------------|-------------------------|----------------------|--------|
| <b>Acquisition Time (sec)</b> | 1.7433 | <b>Comment</b>              | Imported from UXMNR. |                              | <b>Date</b>             | 28 Jan 2021 12:47:40 |        |
| <b>File Name</b>              |        |                             |                      |                              | <b>Frequency (MHz)</b>  | 376.50               |        |
| <b>Nucleus</b>                | 19F    | <b>Number of Transients</b> | 16                   | <b>Original Points Count</b> | 131072                  | <b>Points Count</b>  | 262144 |
| <b>Pulse Sequence</b>         | zgfgn  | <b>Solvent</b>              | CHLOROFORM-D         |                              | <b>Sweep Width (Hz)</b> | 75187.97             |        |
| <b>Temperature (degree C)</b> | 27.000 |                             |                      |                              |                         |                      |        |

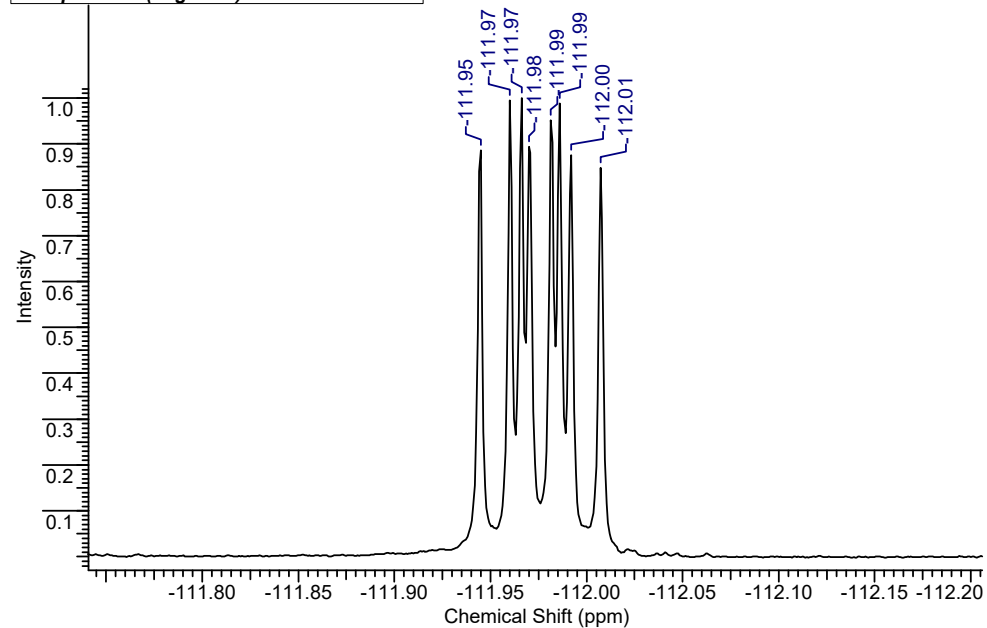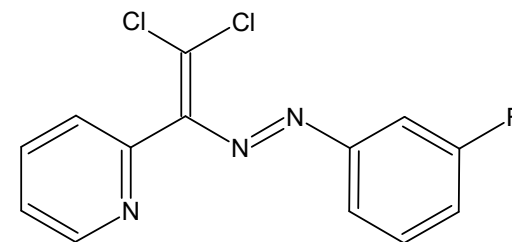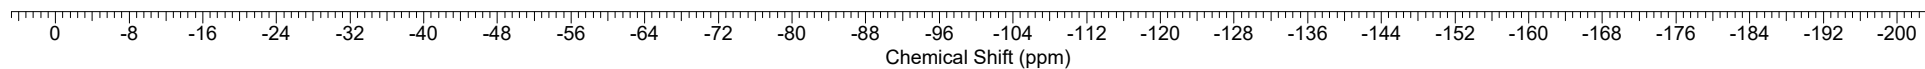

<sup>19</sup>F NMR spectrum of **1m** (376.5 MHz, CDCl<sub>3</sub>)

25 Mar 2021

|                        |                |                      |                      |                       |                  |                      |        |
|------------------------|----------------|----------------------|----------------------|-----------------------|------------------|----------------------|--------|
| Acquisition Time (sec) | 4.0894         | Comment              | Imported from UXNMR. |                       | Date             | 04 Mar 2020 17:34:46 |        |
| File Name              |                |                      |                      |                       | Frequency (MHz)  | 400.13               |        |
| Nucleus                | <sup>1</sup> H | Number of Transients | 4                    | Original Points Count | 32768            | Points Count         | 131072 |
| Pulse Sequence         | zg30           | Solvent              | CHLOROFORM-D         |                       | Sweep Width (Hz) | 8012.82              |        |
| Temperature (degree C) | 27.000         |                      |                      |                       |                  |                      |        |

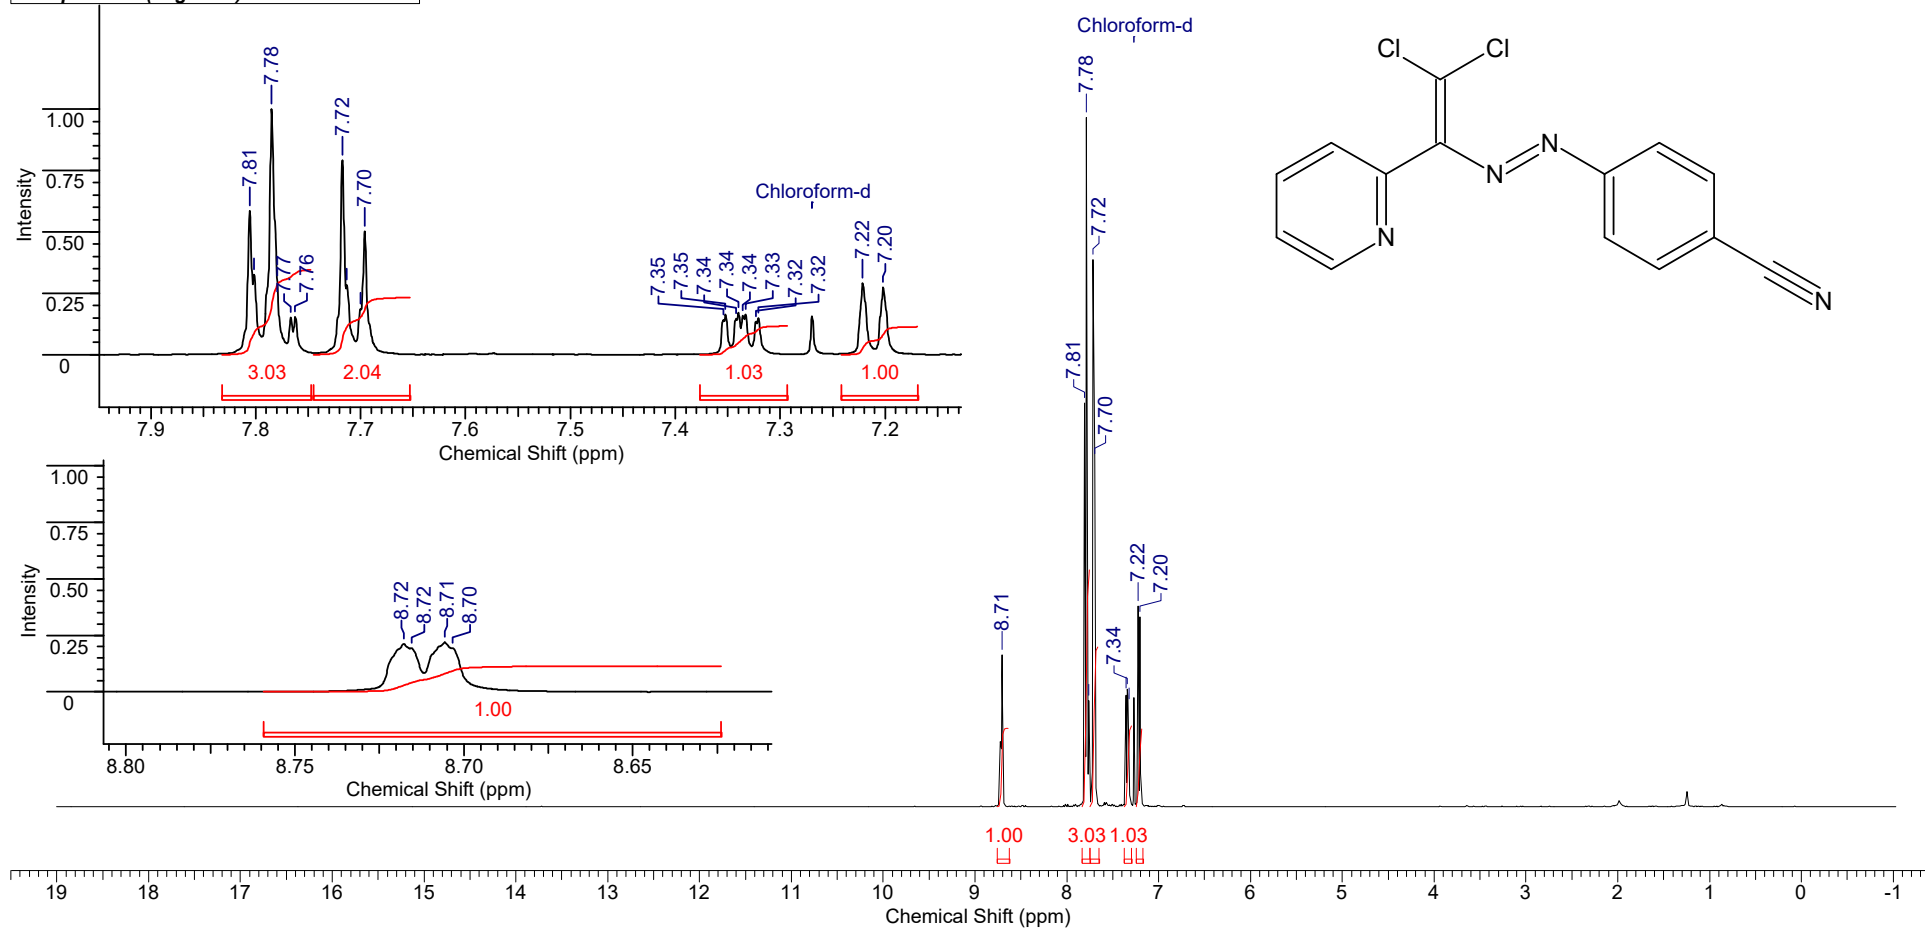

<sup>13</sup>C NMR spectrum of **1n** (400.1 MHz, CDCl<sub>3</sub>)

25 Mar 2021

|                        |                 |                      |                      |                        |                      |
|------------------------|-----------------|----------------------|----------------------|------------------------|----------------------|
| Acquisition Time (sec) | 0.6783          | Comment              | Imported from UXMNR. | Date                   | 04 Mar 2020 17:37:16 |
| File Name              |                 |                      |                      | Frequency (MHz)        | 100.61               |
| Nucleus                | <sup>13</sup> C | Number of Transients | 49                   | Original Points Count  | 16384                |
| Pulse Sequence         | zgpg30          | Solvent              | CHLOROFORM-D         | Points Count           | 131072               |
|                        |                 |                      |                      | Sweep Width (Hz)       | 24154.59             |
|                        |                 |                      |                      | Temperature (degree C) | 27.000               |

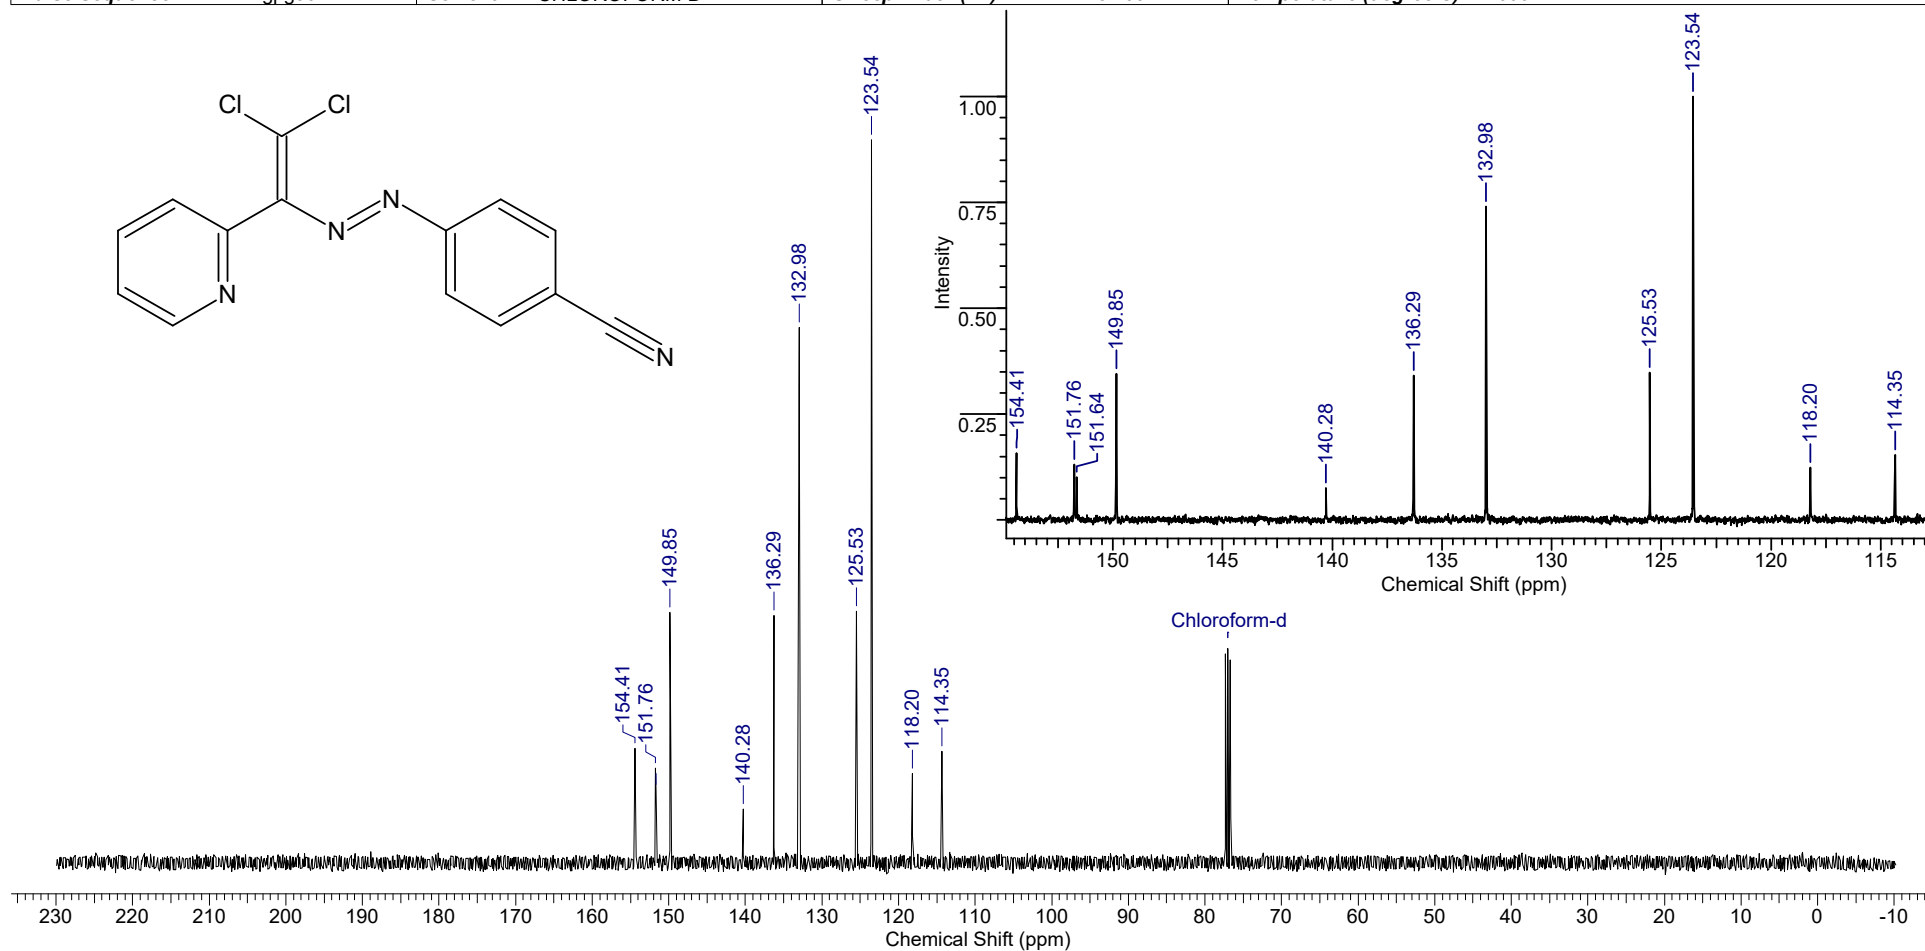

$^{13}\text{C}$  NMR spectrum of **1n** (100.6 MHz,  $\text{CDCl}_3$ )



|                               |        |                             |                      |                              |                     |                        |        |
|-------------------------------|--------|-----------------------------|----------------------|------------------------------|---------------------|------------------------|--------|
| <b>Acquisition Time (sec)</b> | 4.0894 | <b>Comment</b>              | Imported from UXNMR. |                              | <b>Date</b>         | 28 Feb 2020 15:45:44   |        |
| <b>File Name</b>              |        | <b>Number of Transients</b> | 4                    | <b>Original Points Count</b> | 32768               | <b>Frequency (MHz)</b> | 400.13 |
| <b>Nucleus</b>                | 1H     | <b>Solvent</b>              | CHLOROFORM-D         |                              | <b>Points Count</b> | 131072                 |        |
| <b>Pulse Sequence</b>         | zg30   | <b>Sweep Width (Hz)</b>     | 8012.82              |                              |                     |                        |        |
| <b>Temperature (degree C)</b> | 27.000 |                             |                      |                              |                     |                        |        |

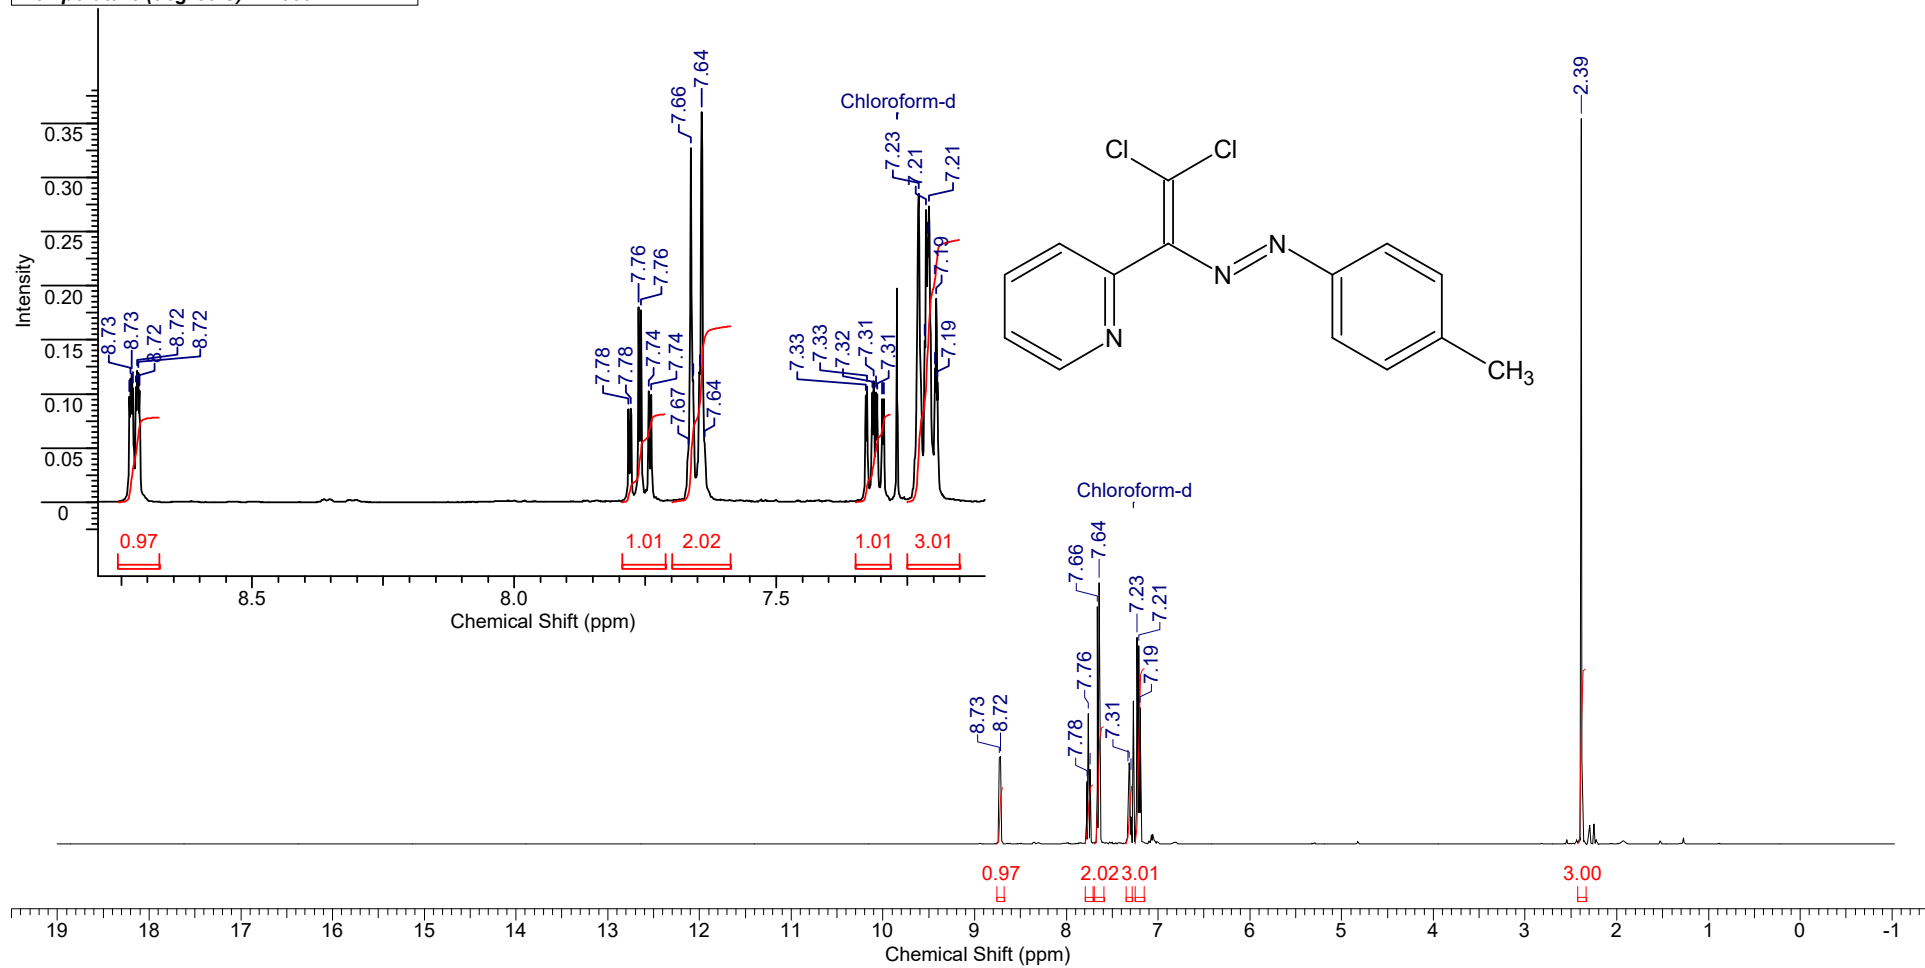

<sup>13</sup>C NMR spectrum of **1o** (400.1 MHz, CDCl<sub>3</sub>)

25 Mar 2021

|                               |        |                             |                      |                               |                      |
|-------------------------------|--------|-----------------------------|----------------------|-------------------------------|----------------------|
| <b>Acquisition Time (sec)</b> | 0.6783 | <b>Comment</b>              | Imported from UXMNR. | <b>Date</b>                   | 28 Feb 2020 15:48:34 |
| <b>File Name</b>              |        |                             |                      | <b>Frequency (MHz)</b>        | 100.61               |
| <b>Nucleus</b>                | 13C    | <b>Number of Transients</b> | 57                   | <b>Original Points Count</b>  | 16384                |
| <b>Pulse Sequence</b>         | zgpg30 | <b>Solvent</b>              | CHLOROFORM-D         | <b>Sweep Width (Hz)</b>       | 24154.59             |
|                               |        |                             |                      | <b>Points Count</b>           | 131072               |
|                               |        |                             |                      | <b>Temperature (degree C)</b> | 27.000               |

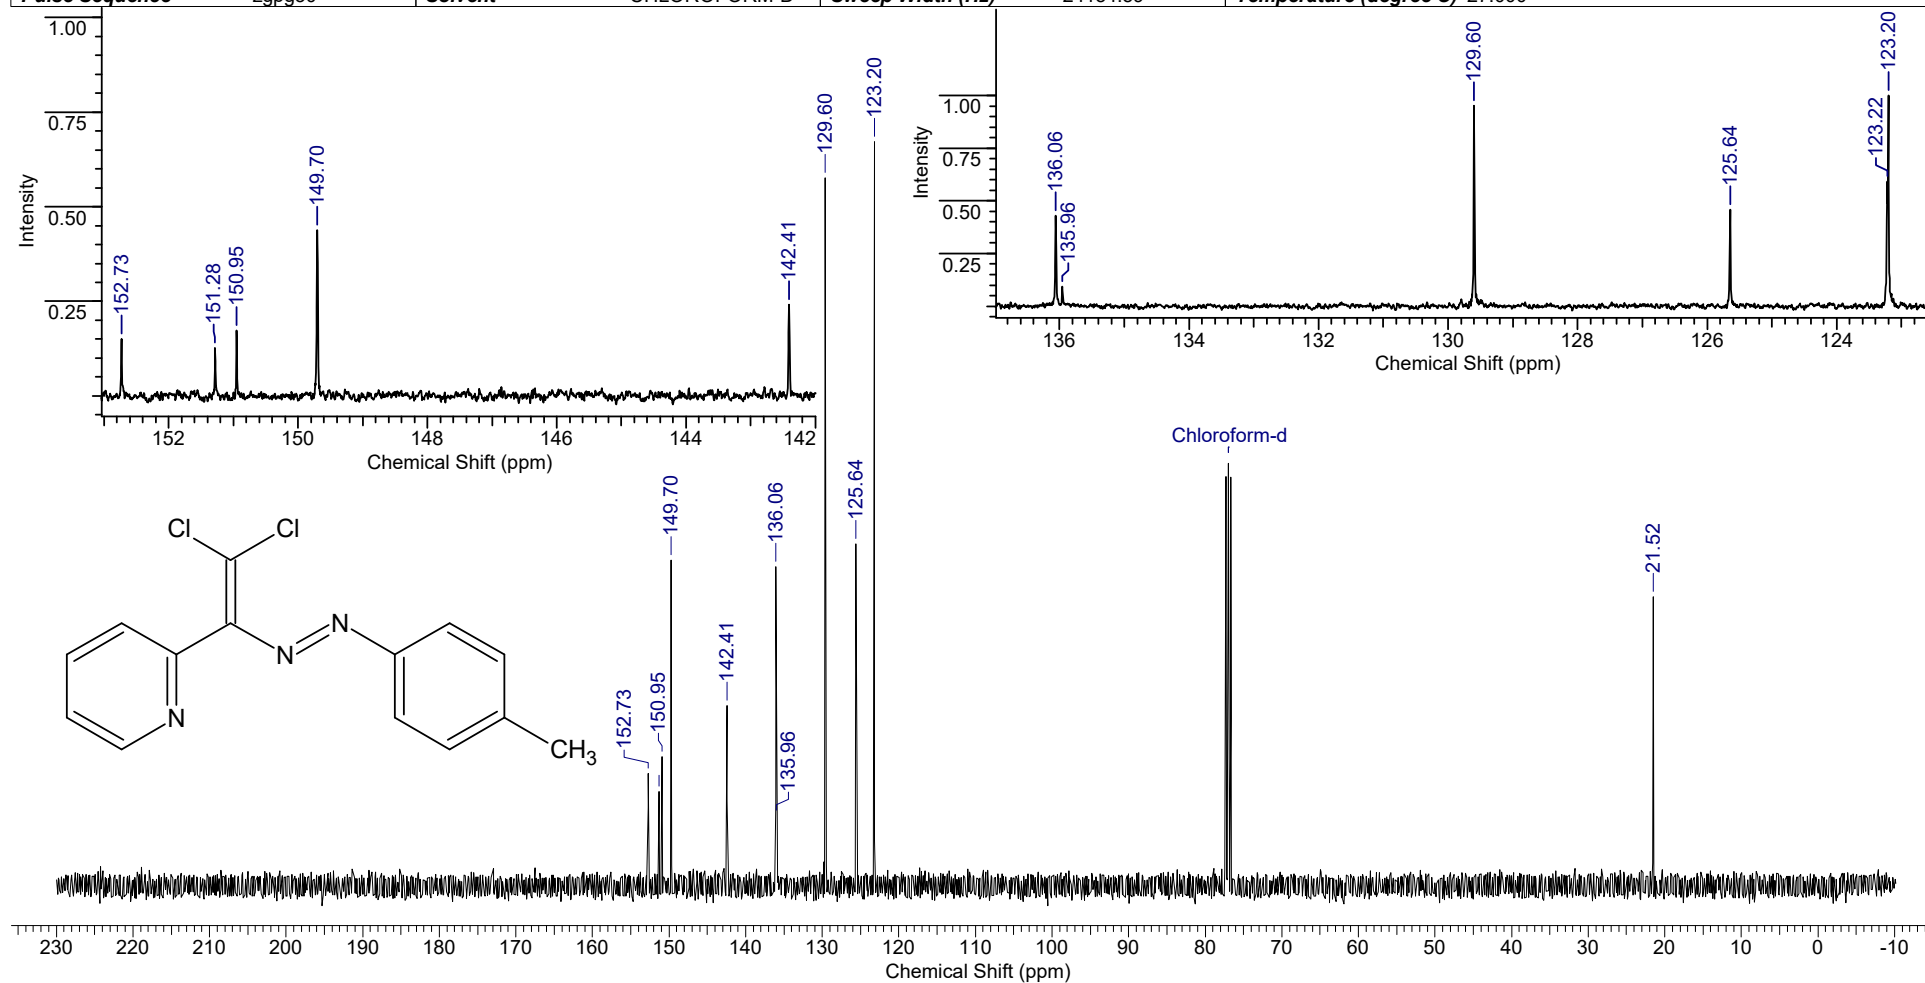

<sup>13</sup>C NMR spectrum of **1o** (100.6 MHz, CDCl<sub>3</sub>)

25 Mar 2021

|                        |        |                      |                      |                       |                  |                      |        |
|------------------------|--------|----------------------|----------------------|-----------------------|------------------|----------------------|--------|
| Acquisition Time (sec) | 4.0894 | Comment              | Imported from UXNMR. |                       | Date             | 15 Dec 2020 14:22:56 |        |
| File Name              |        |                      |                      |                       | Frequency (MHz)  | 400.13               |        |
| Nucleus                | 1H     | Number of Transients | 4                    | Original Points Count | 32768            | Points Count         | 131072 |
| Pulse Sequence         | zg30   | Solvent              | CHLOROFORM-D         |                       | Sweep Width (Hz) | 8012.82              |        |
| Temperature (degree C) | 27.000 |                      |                      |                       |                  |                      |        |

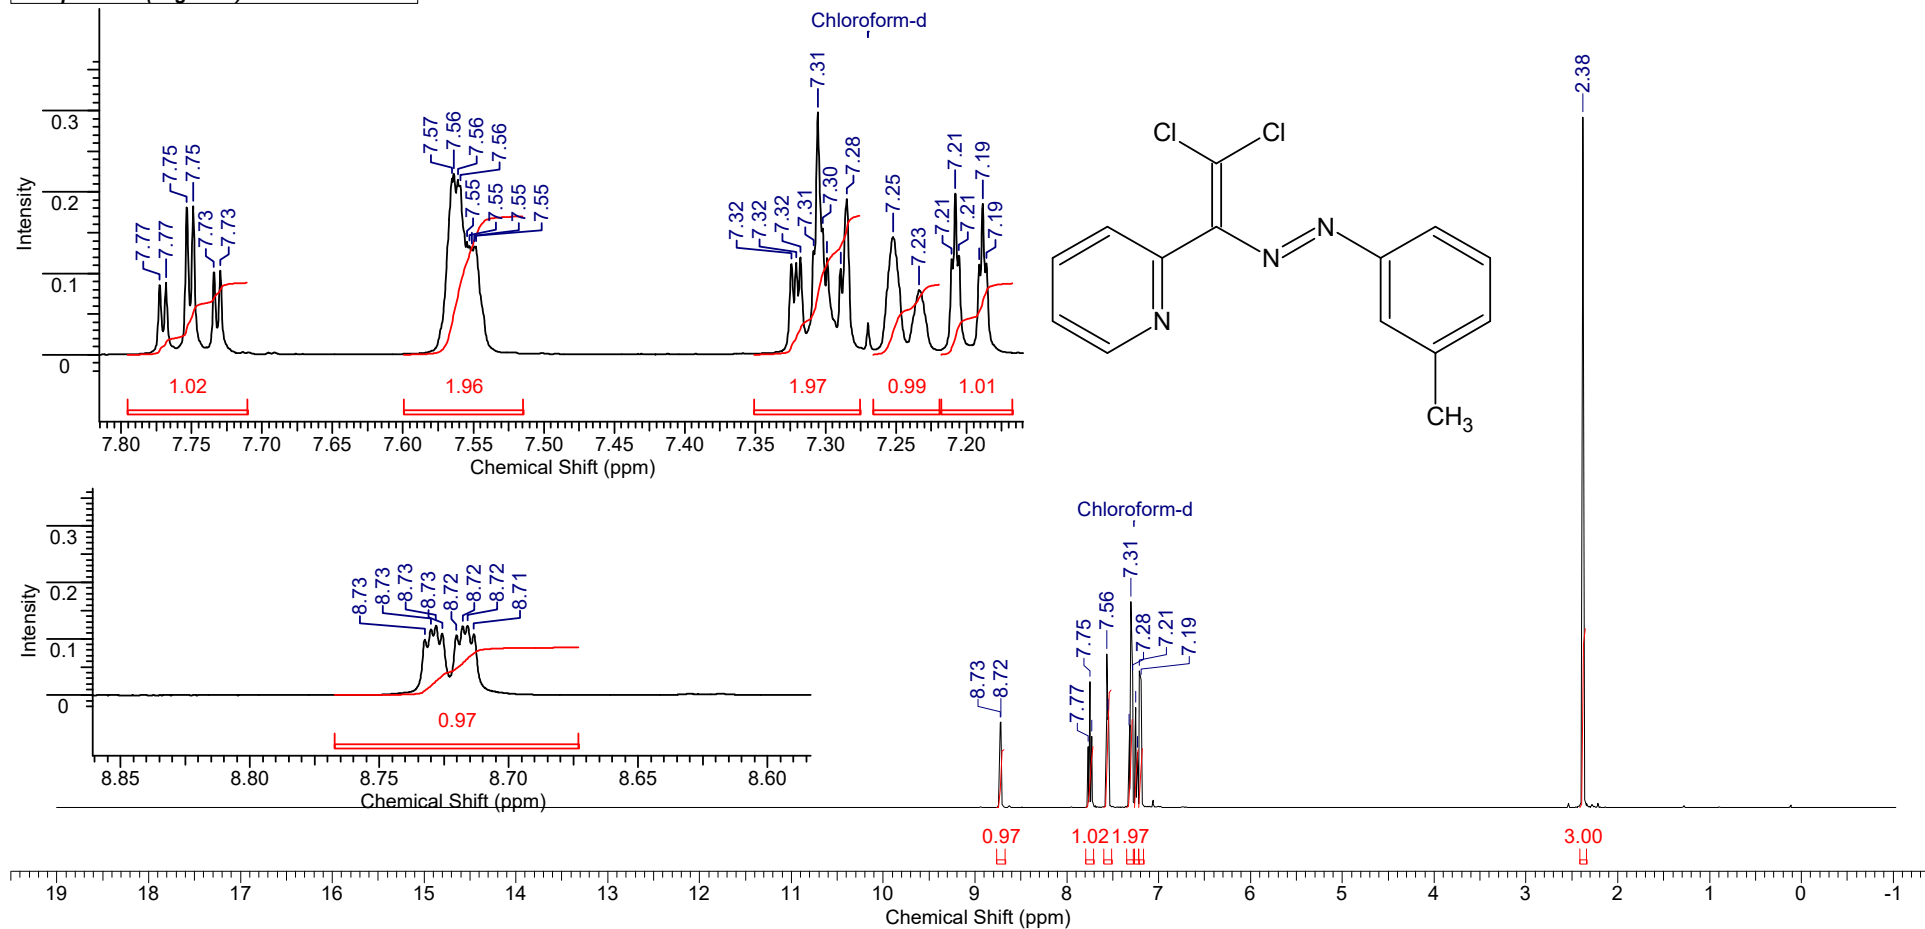

<sup>1</sup>H NMR spectrum of **1p** (400.1 MHz, CDCl<sub>3</sub>)

25 Mar 2021

|                               |        |                             |                      |                              |                        |                               |        |
|-------------------------------|--------|-----------------------------|----------------------|------------------------------|------------------------|-------------------------------|--------|
| <b>Acquisition Time (sec)</b> | 0.6783 | <b>Comment</b>              | Imported from UXMNR. |                              | <b>Date</b>            | 15 Dec 2020 14:26:38          |        |
| <b>File Name</b>              |        |                             |                      |                              | <b>Frequency (MHz)</b> | 100.61                        |        |
| <b>Nucleus</b>                | 13C    | <b>Number of Transients</b> | 81                   | <b>Original Points Count</b> | 16384                  | <b>Points Count</b>           | 131072 |
| <b>Pulse Sequence</b>         | zgpg30 | <b>Solvent</b>              | CHLOROFORM-D         | <b>Sweep Width (Hz)</b>      | 24154.59               | <b>Temperature (degree C)</b> | 27.000 |

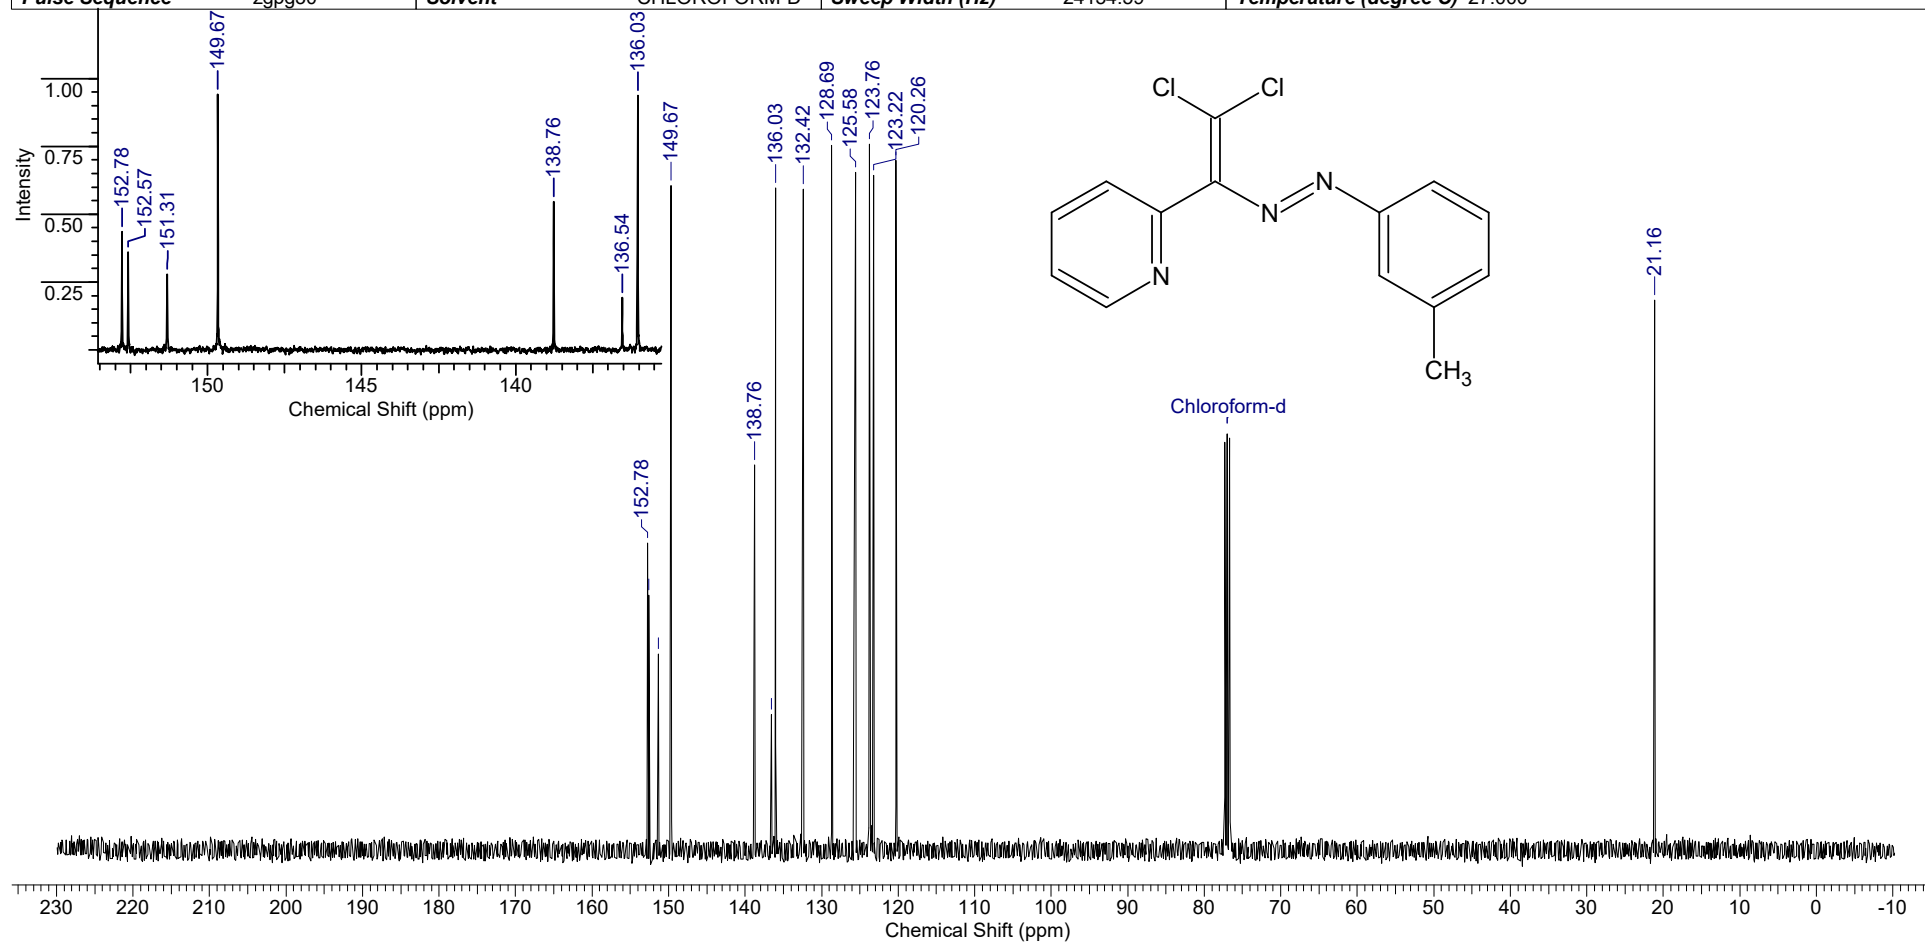

$^{13}\text{C}$  NMR spectrum of **1p** (100.6 MHz,  $\text{CDCl}_3$ )

|                               |                |                             |                      |                              |                      |
|-------------------------------|----------------|-----------------------------|----------------------|------------------------------|----------------------|
| <b>Acquisition Time (sec)</b> | 4.0894         | <b>Comment</b>              | Imported from UXNMR. | <b>Date</b>                  | 30 Jun 2020 14:43:40 |
| <b>File Name</b>              |                |                             |                      | <b>Frequency (MHz)</b>       | 400.13               |
| <b>Nucleus</b>                | <sup>1</sup> H | <b>Number of Transients</b> | 4                    | <b>Original Points Count</b> | 32768                |
| <b>Pulse Sequence</b>         | zg30           | <b>Solvent</b>              | CHLOROFORM-D         | <b>Points Count</b>          | 131072               |
| <b>Temperature (degree C)</b> | 27.000         |                             |                      | <b>Sweep Width (Hz)</b>      | 8012.82              |

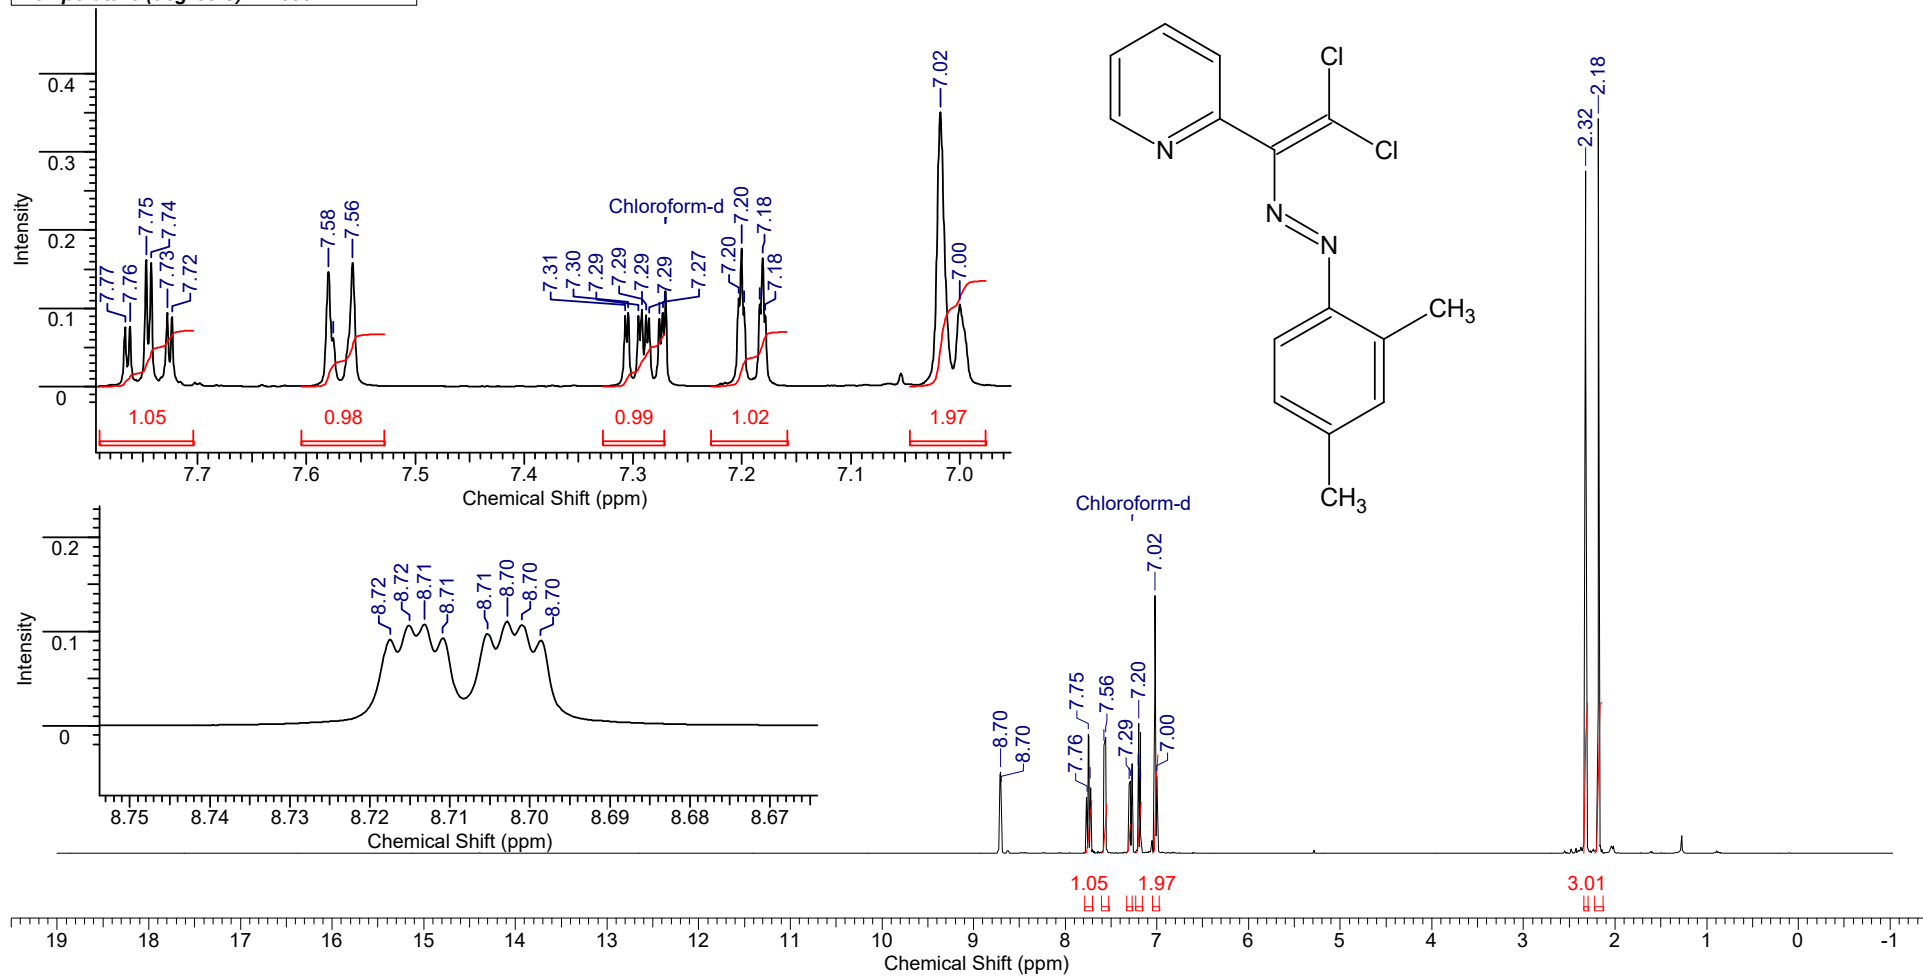

$^1\text{H}$  NMR spectrum of **1q** (400.1 MHz,  $\text{CDCl}_3$ )

|                               |                 |                             |                      |                              |                         |                      |        |
|-------------------------------|-----------------|-----------------------------|----------------------|------------------------------|-------------------------|----------------------|--------|
| <b>Acquisition Time (sec)</b> | 0.6783          | <b>Comment</b>              | Imported from UXNMR. |                              | <b>Date</b>             | 30 Jun 2020 14:47:06 |        |
| <b>File Name</b>              |                 |                             |                      |                              | <b>Frequency (MHz)</b>  | 100.61               |        |
| <b>Nucleus</b>                | <sup>13</sup> C | <b>Number of Transients</b> | 65                   | <b>Original Points Count</b> | 16384                   | <b>Points Count</b>  | 131072 |
| <b>Pulse Sequence</b>         | zpgpg30         | <b>Solvent</b>              | CHLOROFORM-D         |                              | <b>Sweep Width (Hz)</b> | 24154.59             |        |
| <b>Temperature (degree C)</b> | 27.000          |                             |                      |                              |                         |                      |        |

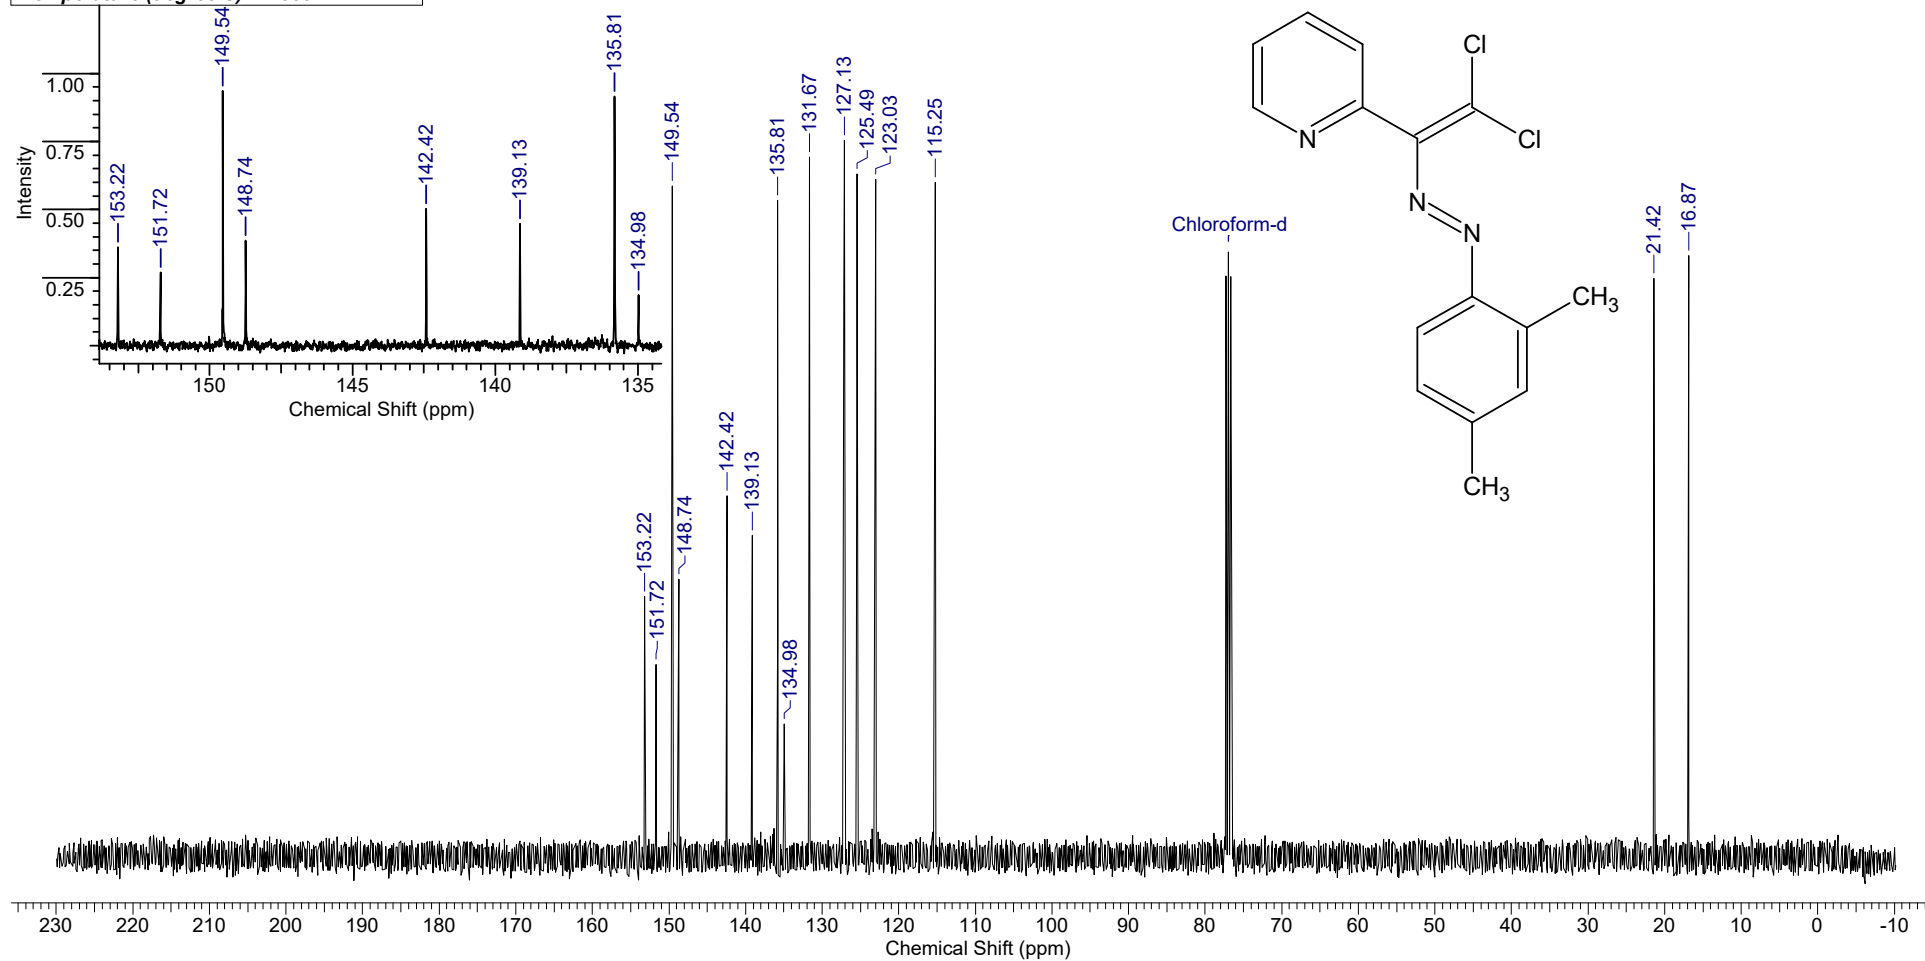



$^{13}\text{C}$  NMR spectrum of **1q** (100.6 MHz,  $\text{CDCl}_3$ )

|                               |        |                               |                      |                              |                         |                      |
|-------------------------------|--------|-------------------------------|----------------------|------------------------------|-------------------------|----------------------|
| <b>Acquisition Time (sec)</b> | 4.0894 | <b>Comment</b>                | Imported from UXNMR. |                              | <b>Date</b>             | 21 Dec 2020 15:45:18 |
| <b>File Name</b>              |        | <b>Number of Transients</b>   | 4                    | <b>Original Points Count</b> | <b>Frequency (MHz)</b>  | 400.13               |
| <b>Nucleus</b>                | 1H     | <b>Solvent</b>                | CHLOROFORM-D         |                              | <b>Points Count</b>     | 131072               |
| <b>Pulse Sequence</b>         | zg30   | <b>Temperature (degree C)</b> | 27.000               |                              | <b>Sweep Width (Hz)</b> | 8012.82              |

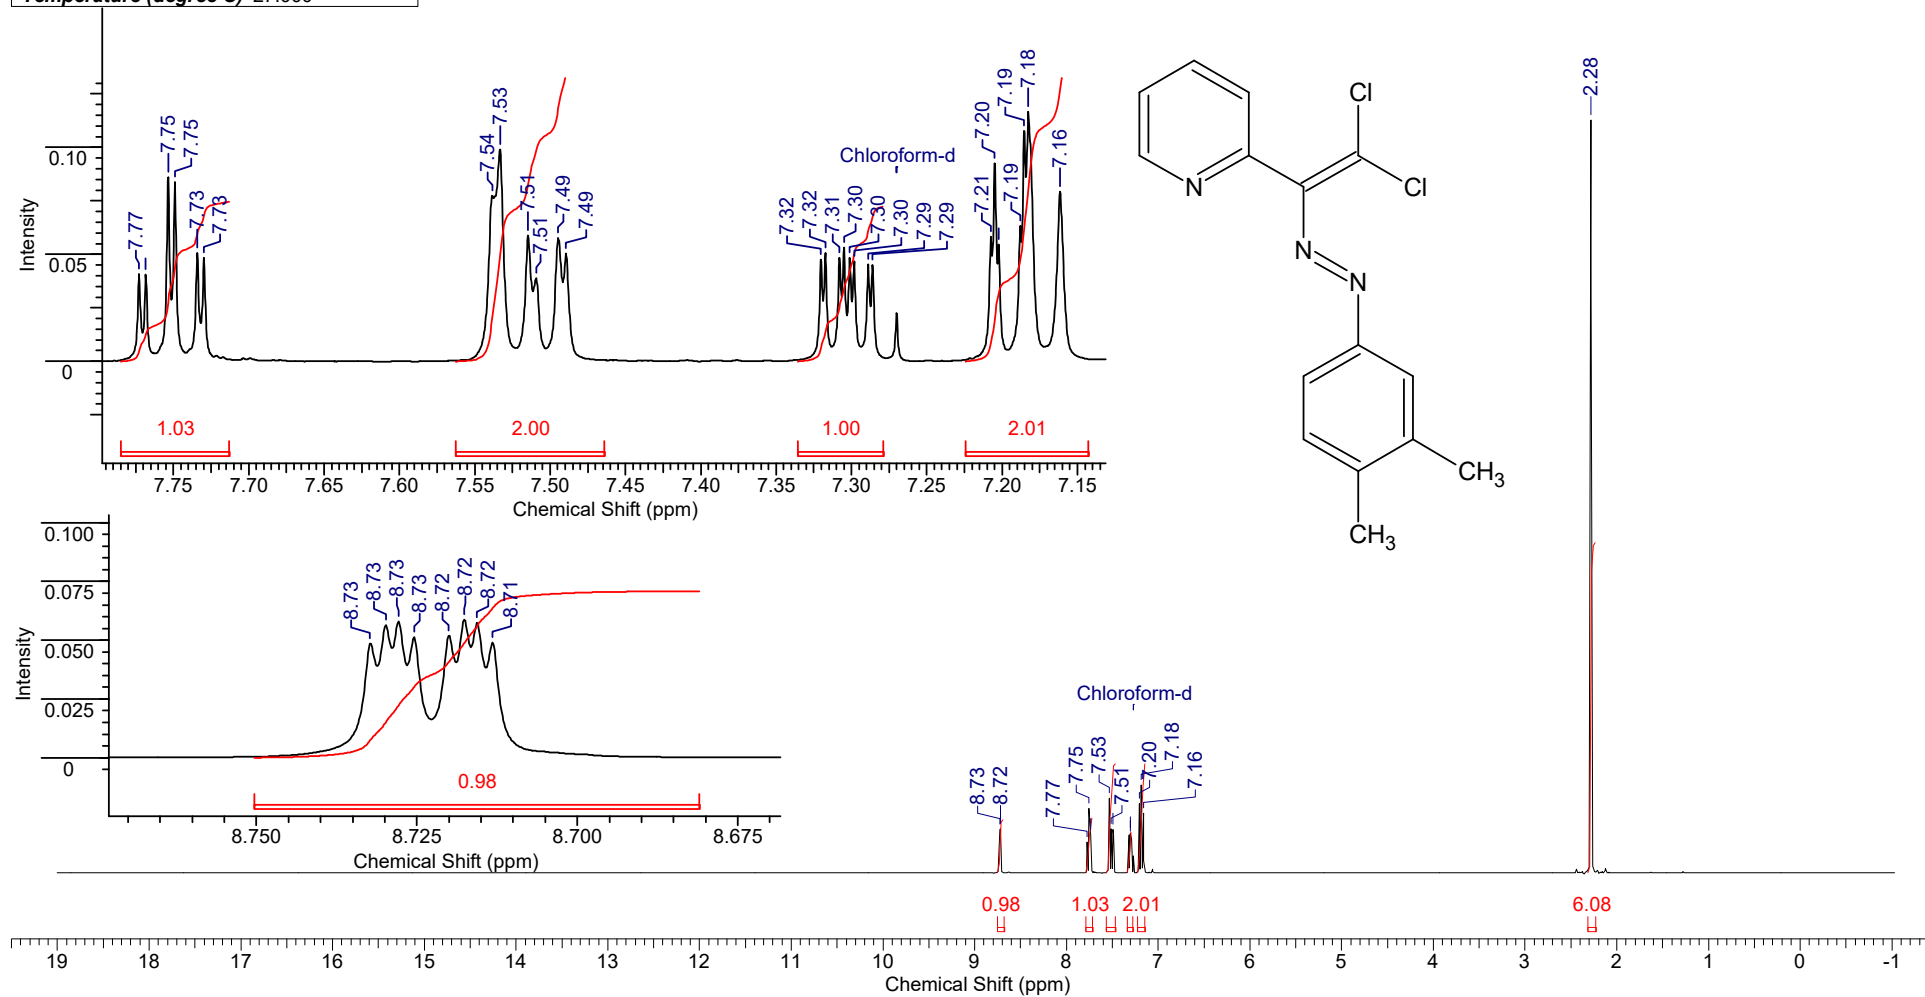

$^1\text{H}$  NMR spectrum of **1r** (400.1 MHz,  $\text{CDCl}_3$ )

|                               |                 |                             |                      |                              |                        |                               |        |
|-------------------------------|-----------------|-----------------------------|----------------------|------------------------------|------------------------|-------------------------------|--------|
| <b>Acquisition Time (sec)</b> | 0.6783          | <b>Comment</b>              | Imported from UXMNR. |                              | <b>Date</b>            | 21 Dec 2020 15:49:02          |        |
| <b>File Name</b>              |                 |                             |                      |                              | <b>Frequency (MHz)</b> | 100.61                        |        |
| <b>Nucleus</b>                | <sup>13</sup> C | <b>Number of Transients</b> | 50                   | <b>Original Points Count</b> | 16384                  | <b>Points Count</b>           | 131072 |
| <b>Pulse Sequence</b>         | zgpg30          | <b>Solvent</b>              | CHLOROFORM-D         | <b>Sweep Width (Hz)</b>      | 24154.59               | <b>Temperature (degree C)</b> | 27.000 |

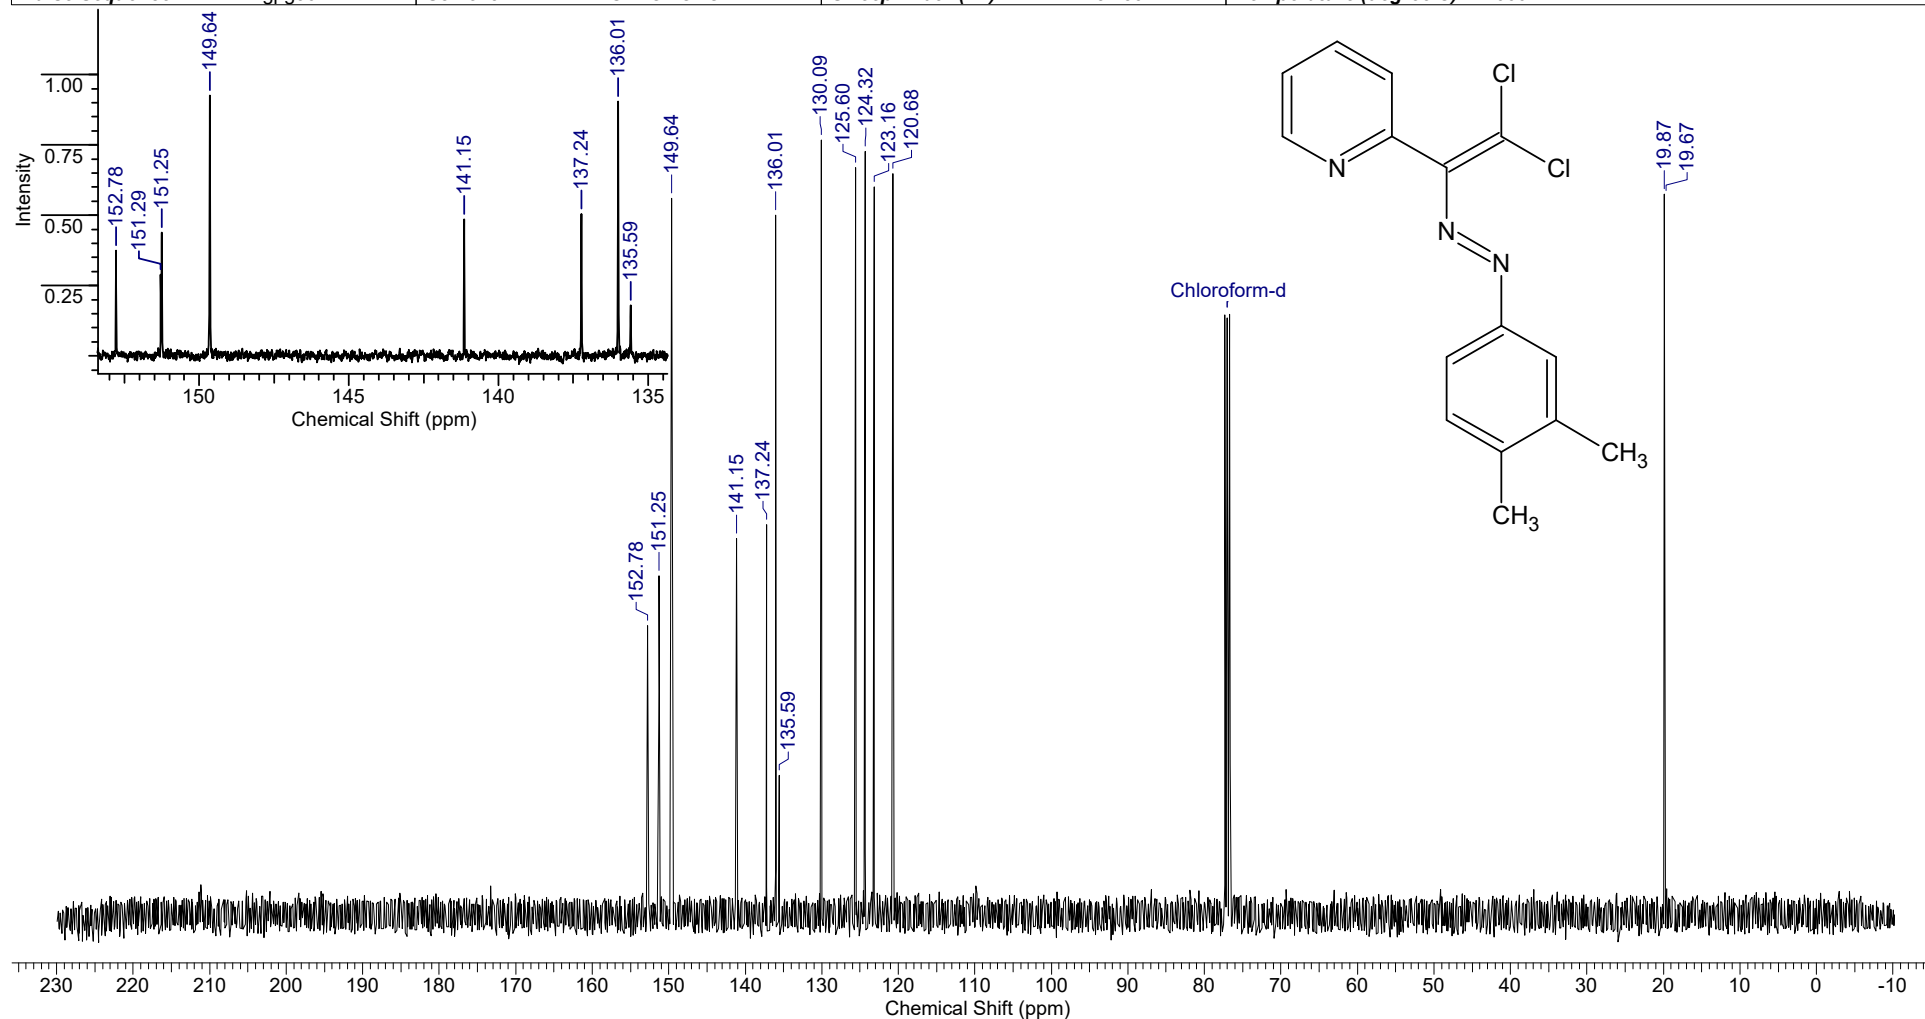

$^{13}\text{C}$  NMR spectrum of **1r** (100.6 MHz,  $\text{CDCl}_3$ )

|                               |        |                               |                      |                              |                         |                        |        |
|-------------------------------|--------|-------------------------------|----------------------|------------------------------|-------------------------|------------------------|--------|
| <b>Acquisition Time (sec)</b> | 4.0894 | <b>Comment</b>                | Imported from UXMNR. |                              | <b>Date</b>             | 18 Feb 2020 14:22:08   |        |
| <b>File Name</b>              |        | <b>Number of Transients</b>   | 4                    | <b>Original Points Count</b> | 32768                   | <b>Frequency (MHz)</b> | 400.13 |
| <b>Nucleus</b>                | 1H     | <b>Solvent</b>                | CHLOROFORM-D         |                              | <b>Points Count</b>     | 131072                 |        |
| <b>Pulse Sequence</b>         | zg30   | <b>Temperature (degree C)</b> | 27.000               |                              | <b>Sweep Width (Hz)</b> | 8012.82                |        |

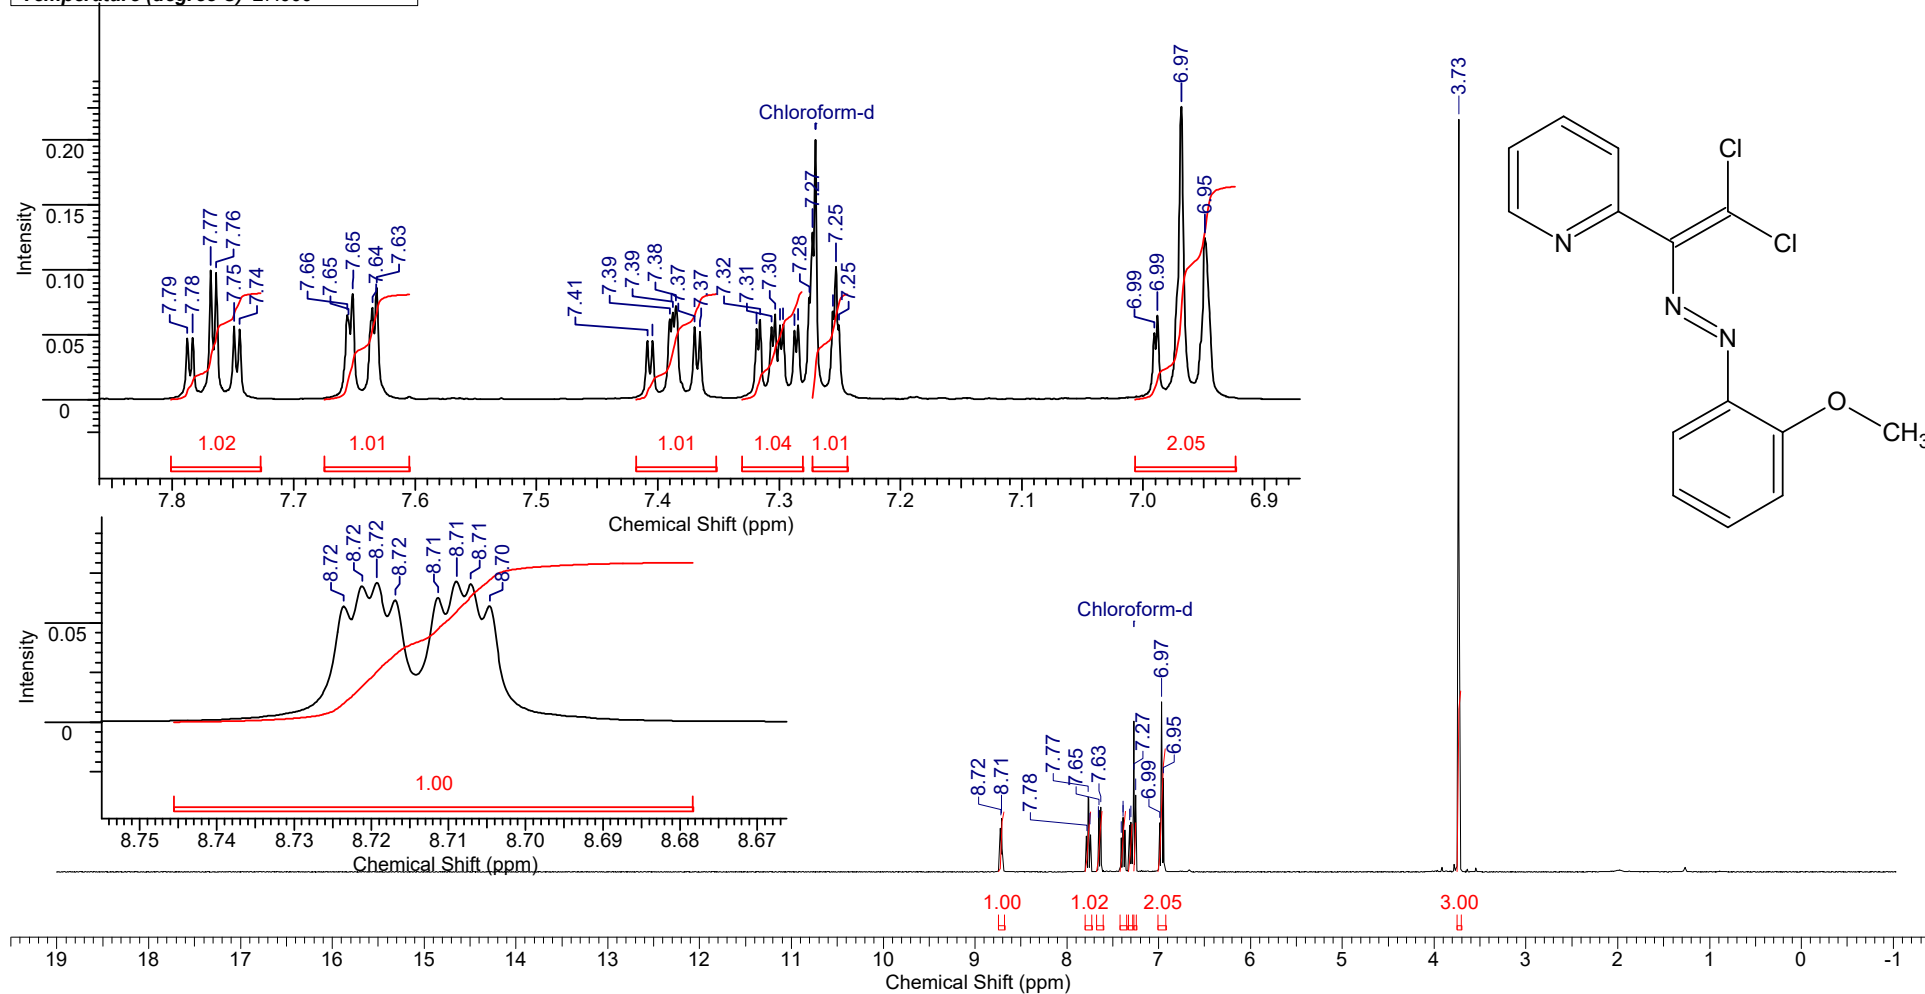

$^1\text{H}$  NMR spectrum of **1s** (400.1 MHz,  $\text{CDCl}_3$ )

|                               |                 |                             |                      |                              |             |                               |        |
|-------------------------------|-----------------|-----------------------------|----------------------|------------------------------|-------------|-------------------------------|--------|
| <b>Acquisition Time (sec)</b> | 0.6783          | <b>Comment</b>              | Imported from UXMNR. |                              | <b>Date</b> | 18 Feb 2020 14:31:22          |        |
| <b>File Name</b>              |                 | <b>Number of Transients</b> | 161                  | <b>Original Points Count</b> | 16384       | <b>Frequency (MHz)</b>        | 100.61 |
| <b>Nucleus</b>                | <sup>13</sup> C | <b>Solvent</b>              | CHLOROFORM-D         | <b>Sweep Width (Hz)</b>      | 24154.59    | <b>Points Count</b>           | 131072 |
| <b>Pulse Sequence</b>         | zgpg30          |                             |                      |                              |             | <b>Temperature (degree C)</b> | 27.000 |

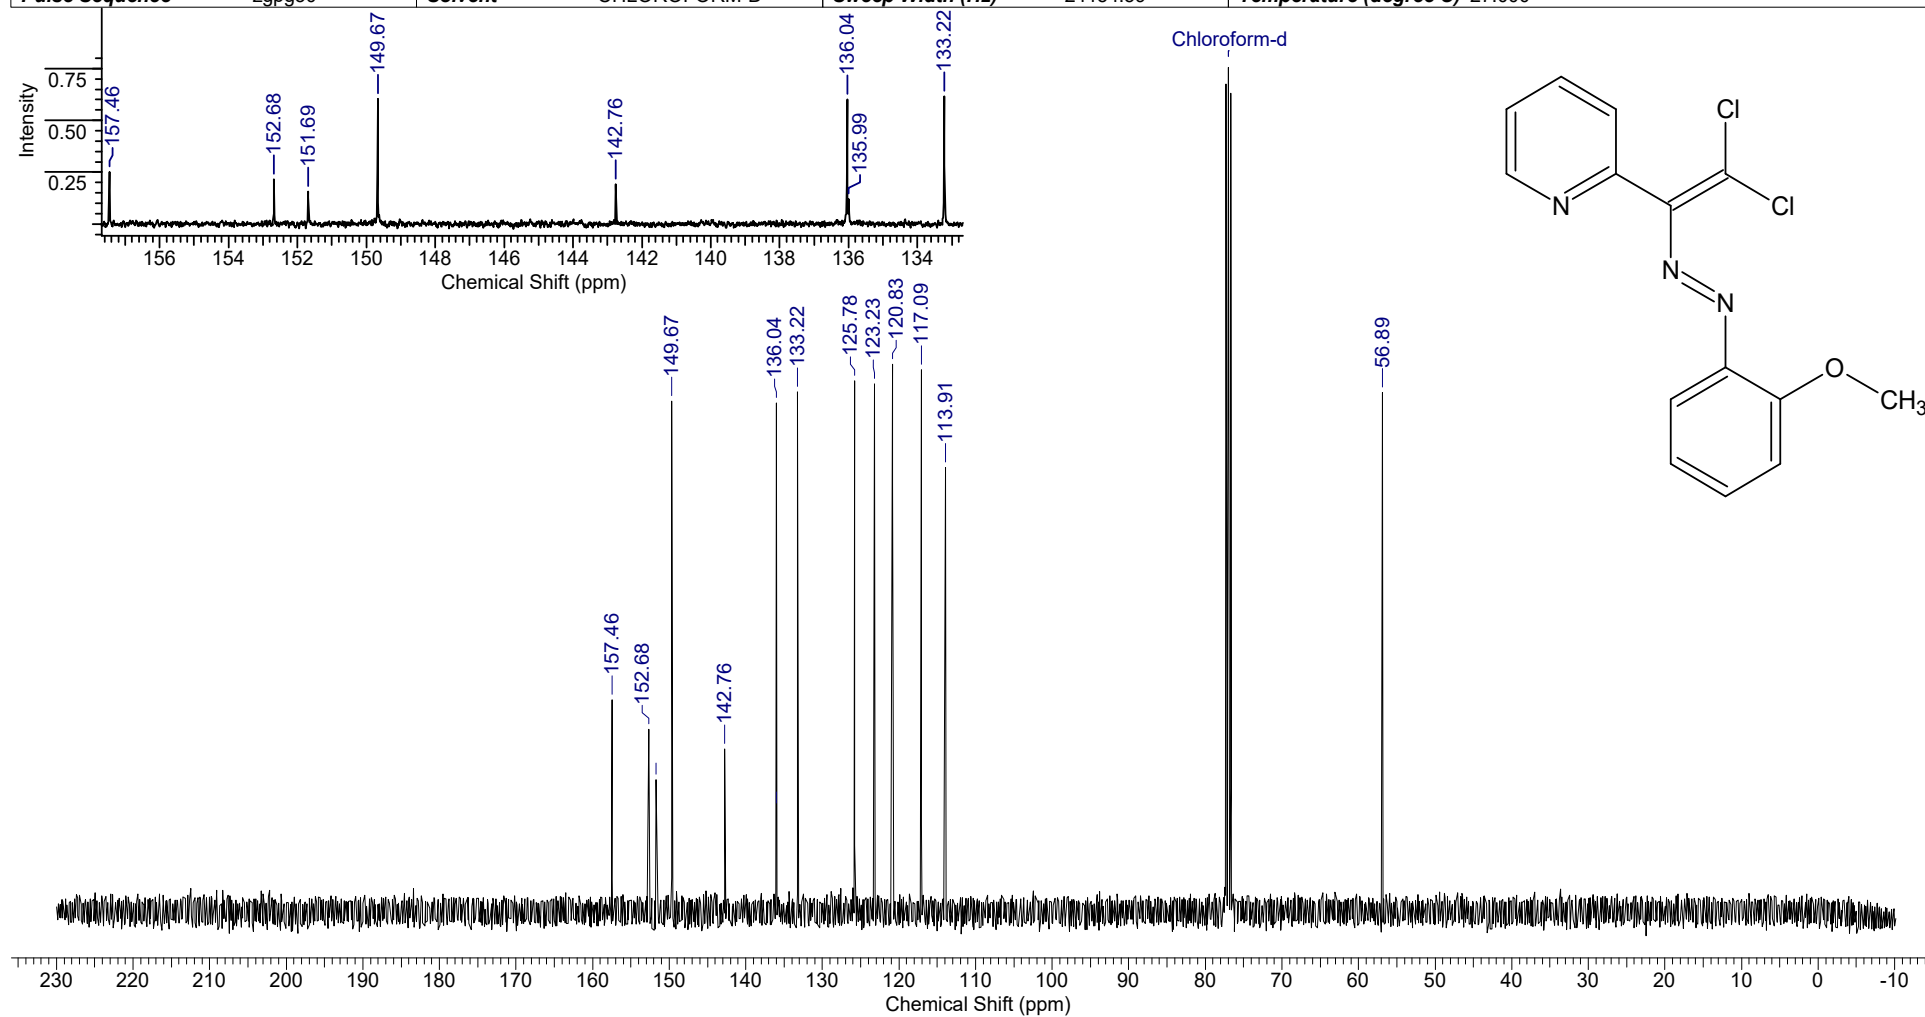



$^{13}\text{C}$  NMR spectrum of **1s** (100.6 MHz,  $\text{CDCl}_3$ )

|                               |        |                             |                      |                              |                     |                        |        |
|-------------------------------|--------|-----------------------------|----------------------|------------------------------|---------------------|------------------------|--------|
| <b>Acquisition Time (sec)</b> | 4.0894 | <b>Comment</b>              | Imported from UXNMR. |                              | <b>Date</b>         | 21 Feb 2020 15:19:50   |        |
| <b>File Name</b>              |        | <b>Number of Transients</b> | 4                    | <b>Original Points Count</b> | 32768               | <b>Frequency (MHz)</b> | 400.13 |
| <b>Nucleus</b>                | 1H     | <b>Solvent</b>              | CHLOROFORM-D         |                              | <b>Points Count</b> | 131072                 |        |
| <b>Pulse Sequence</b>         | zg30   | <b>Sweep Width (Hz)</b>     | 8012.82              |                              |                     |                        |        |
| <b>Temperature (degree C)</b> | 27.000 |                             |                      |                              |                     |                        |        |

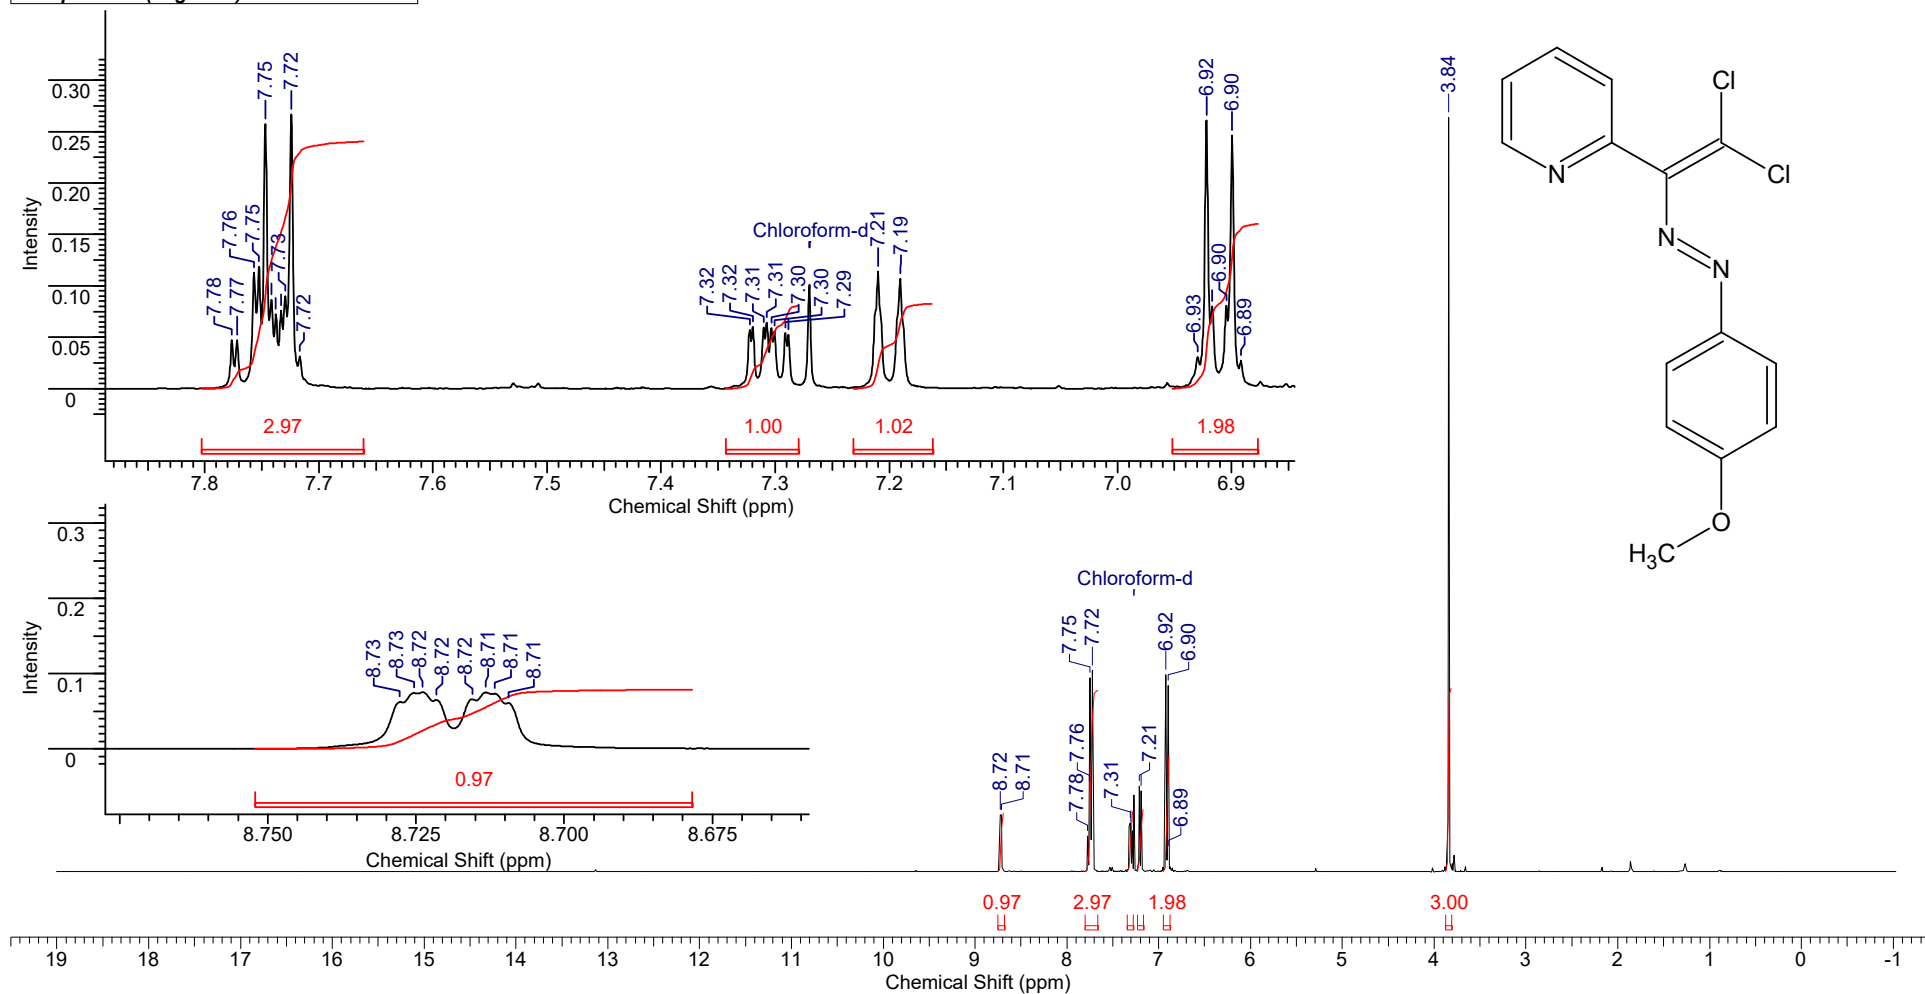

$^1\text{H}$  NMR spectrum of **1t** (400.1 MHz,  $\text{CDCl}_3$ )

|                               |        |                             |                      |                              |                        |                               |        |
|-------------------------------|--------|-----------------------------|----------------------|------------------------------|------------------------|-------------------------------|--------|
| <b>Acquisition Time (sec)</b> | 0.6783 | <b>Comment</b>              | Imported from UXMNR. |                              | <b>Date</b>            | 21 Feb 2020 15:23:48          |        |
| <b>File Name</b>              |        |                             |                      |                              | <b>Frequency (MHz)</b> | 100.61                        |        |
| <b>Nucleus</b>                | 13C    | <b>Number of Transients</b> | 62                   | <b>Original Points Count</b> | 16384                  | <b>Points Count</b>           | 131072 |
| <b>Pulse Sequence</b>         | zgpg30 | <b>Solvent</b>              | CHLOROFORM-D         | <b>Sweep Width (Hz)</b>      | 24154.59               | <b>Temperature (degree C)</b> | 27.000 |

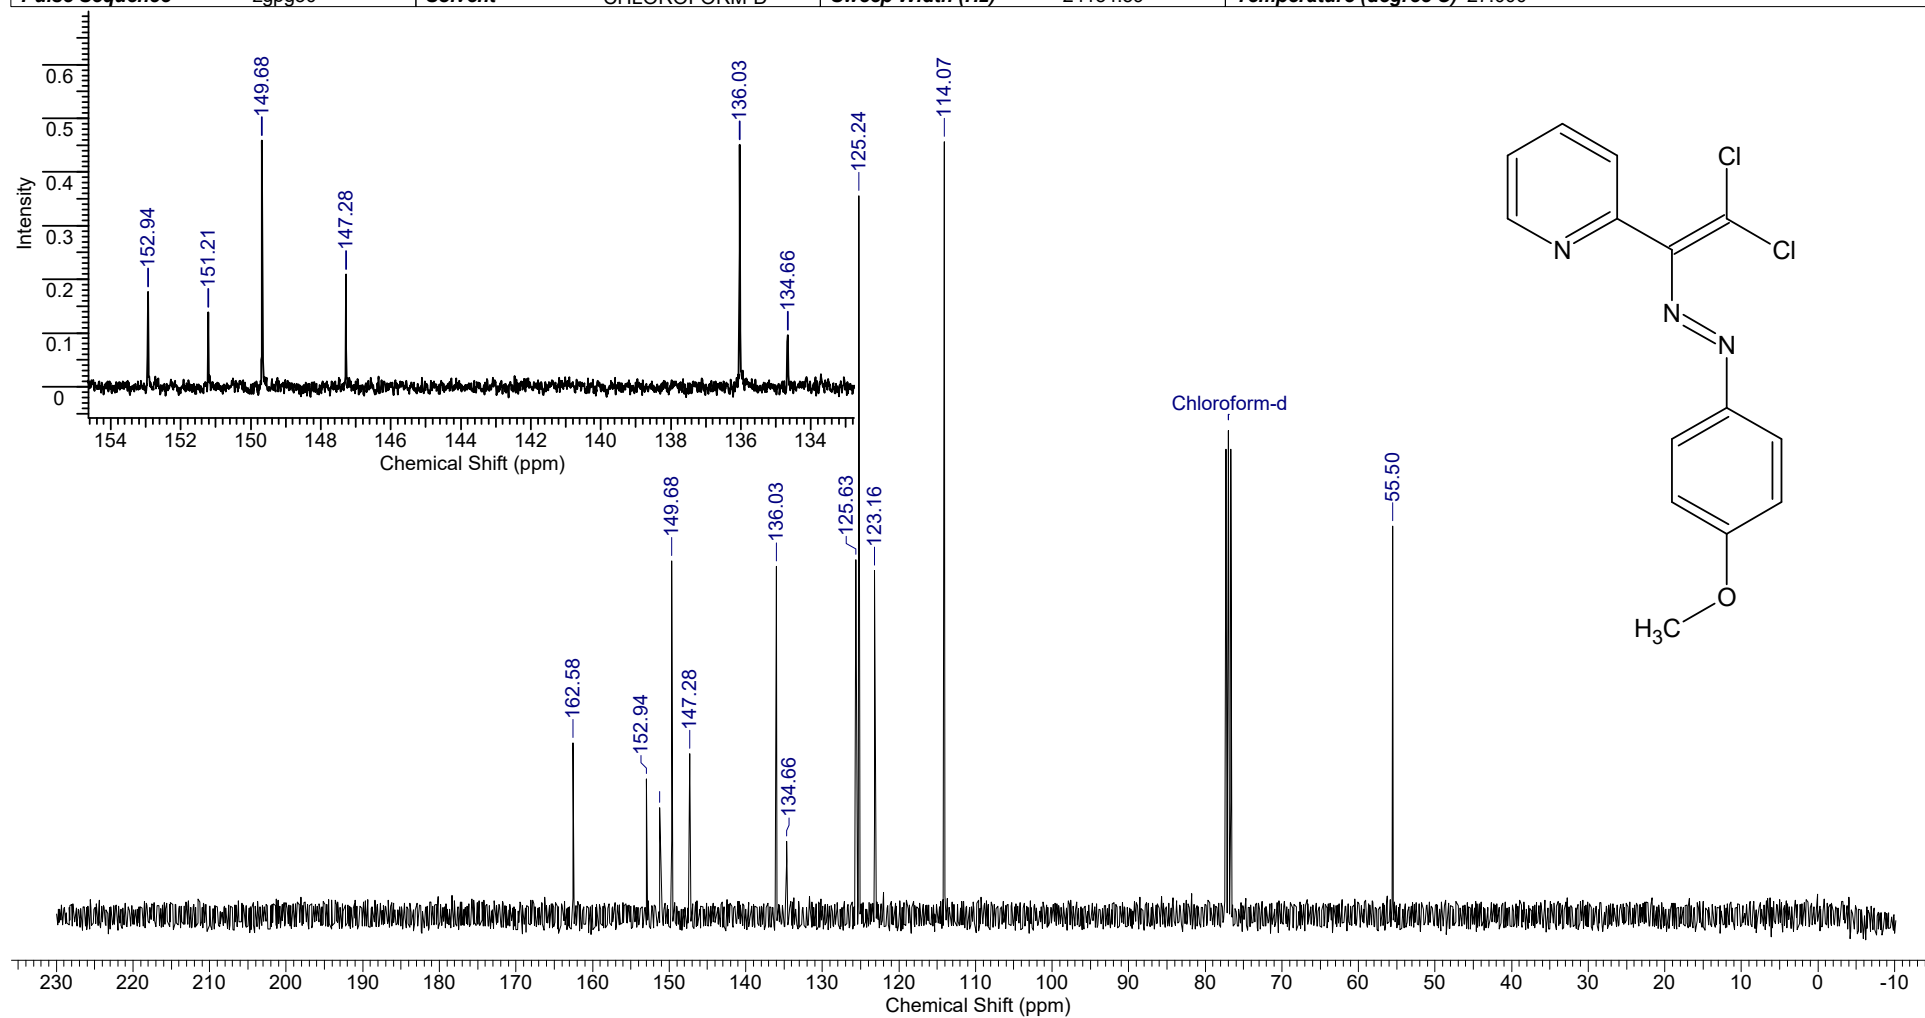

$^{13}\text{C}$  NMR spectrum of **1t** (100.6 MHz,  $\text{CDCl}_3$ )

|                               |                |                             |                      |                              |                      |
|-------------------------------|----------------|-----------------------------|----------------------|------------------------------|----------------------|
| <b>Acquisition Time (sec)</b> | 4.0894         | <b>Comment</b>              | Imported from UXNMR. | <b>Date</b>                  | 04 Dec 2020 13:17:04 |
| <b>File Name</b>              |                | <b>Number of Transients</b> | 4                    | <b>Original Points Count</b> | 32768                |
| <b>Nucleus</b>                | <sup>1</sup> H | <b>Solvent</b>              | CHLOROFORM-D         | <b>Frequency (MHz)</b>       | 400.13               |
| <b>Pulse Sequence</b>         | zg30           |                             |                      | <b>Points Count</b>          | 131072               |
| <b>Temperature (degree C)</b> | 27.000         |                             |                      | <b>Sweep Width (Hz)</b>      | 8012.82              |

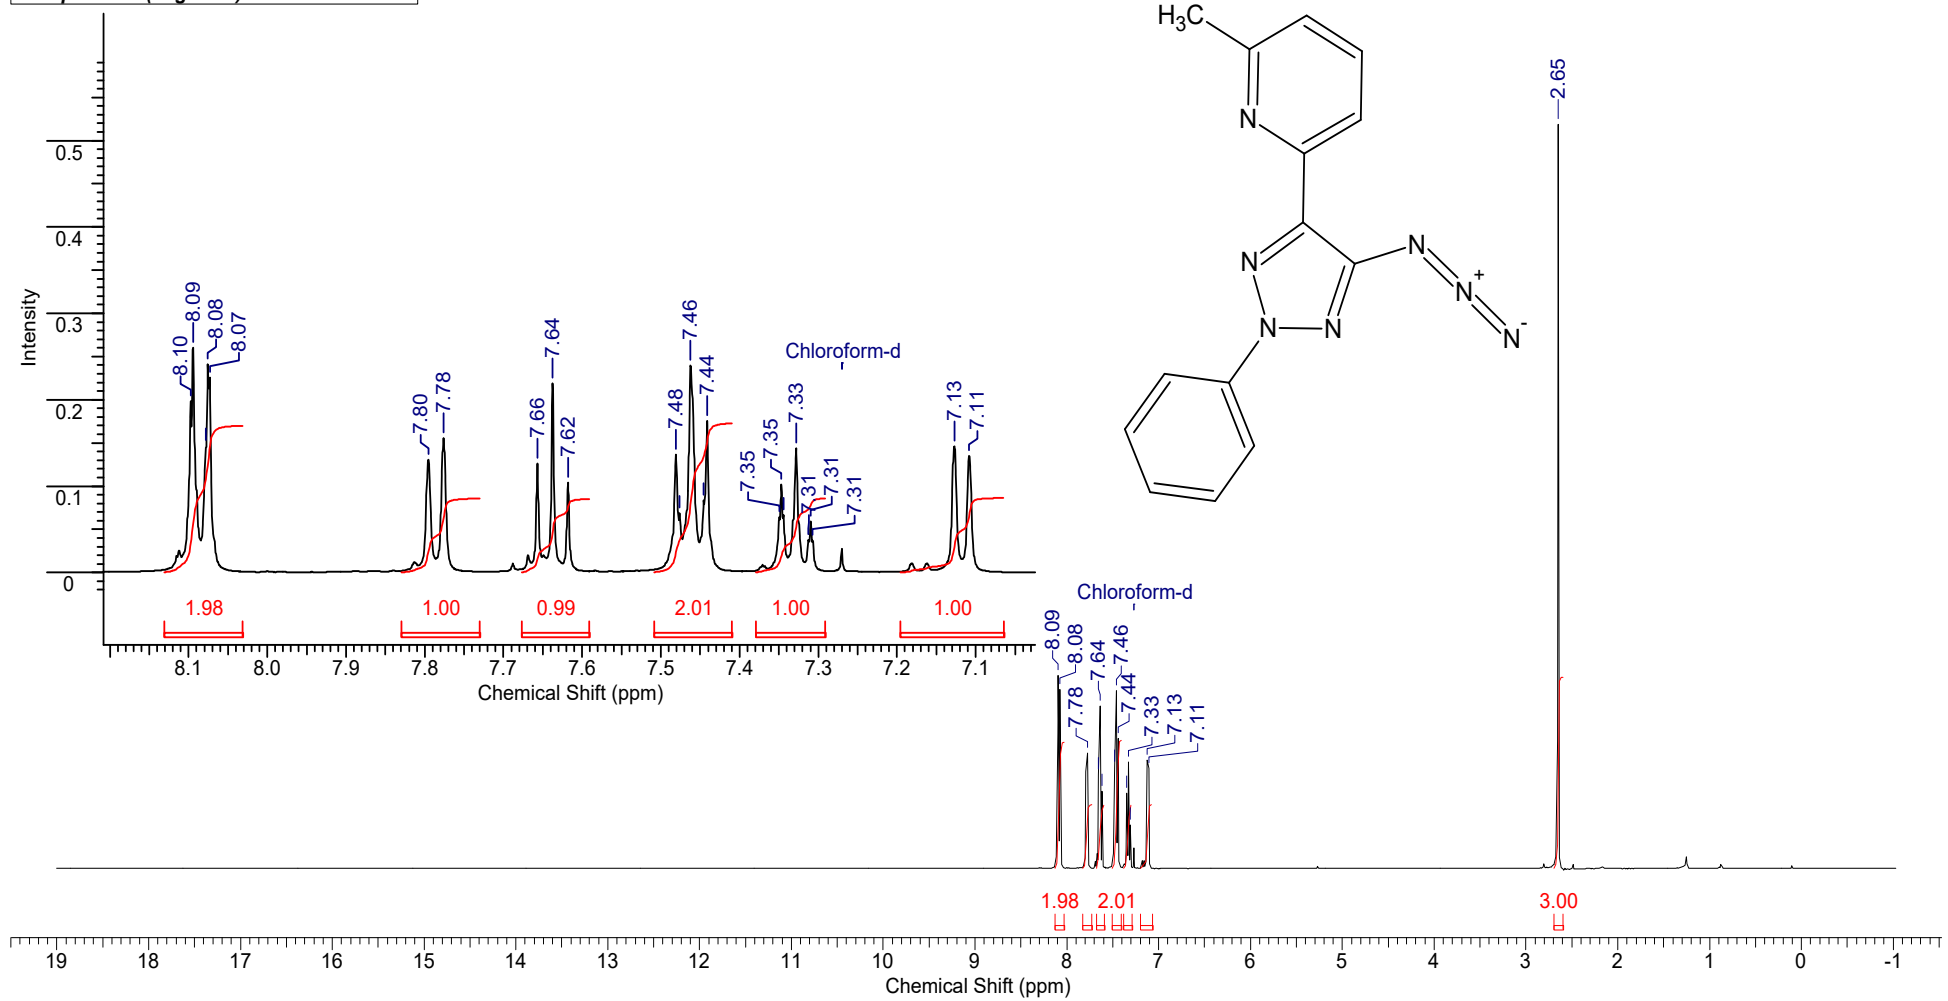

$^1\text{H}$  NMR spectrum of **2c** (400.1 MHz,  $\text{CDCl}_3$ )

|                               |                 |                              |                      |                               |                      |
|-------------------------------|-----------------|------------------------------|----------------------|-------------------------------|----------------------|
| <b>Acquisition Time (sec)</b> | 0.6783          | <b>Comment</b>               | Imported from UXNMR. | <b>Date</b>                   | 04 Dec 2020 13:21:20 |
| <b>File Name</b>              |                 | <b>Number of Transients</b>  | 65                   | <b>Frequency (MHz)</b>        | 100.61               |
| <b>Nucleus</b>                | <sup>13</sup> C | <b>Original Points Count</b> | 16384                | <b>Points Count</b>           | 131072               |
| <b>Pulse Sequence</b>         | zgpg30          | <b>Solvent</b>               | CHLOROFORM-D         | <b>Sweep Width (Hz)</b>       | 24154.59             |
|                               |                 |                              |                      | <b>Temperature (degree C)</b> | 27.000               |

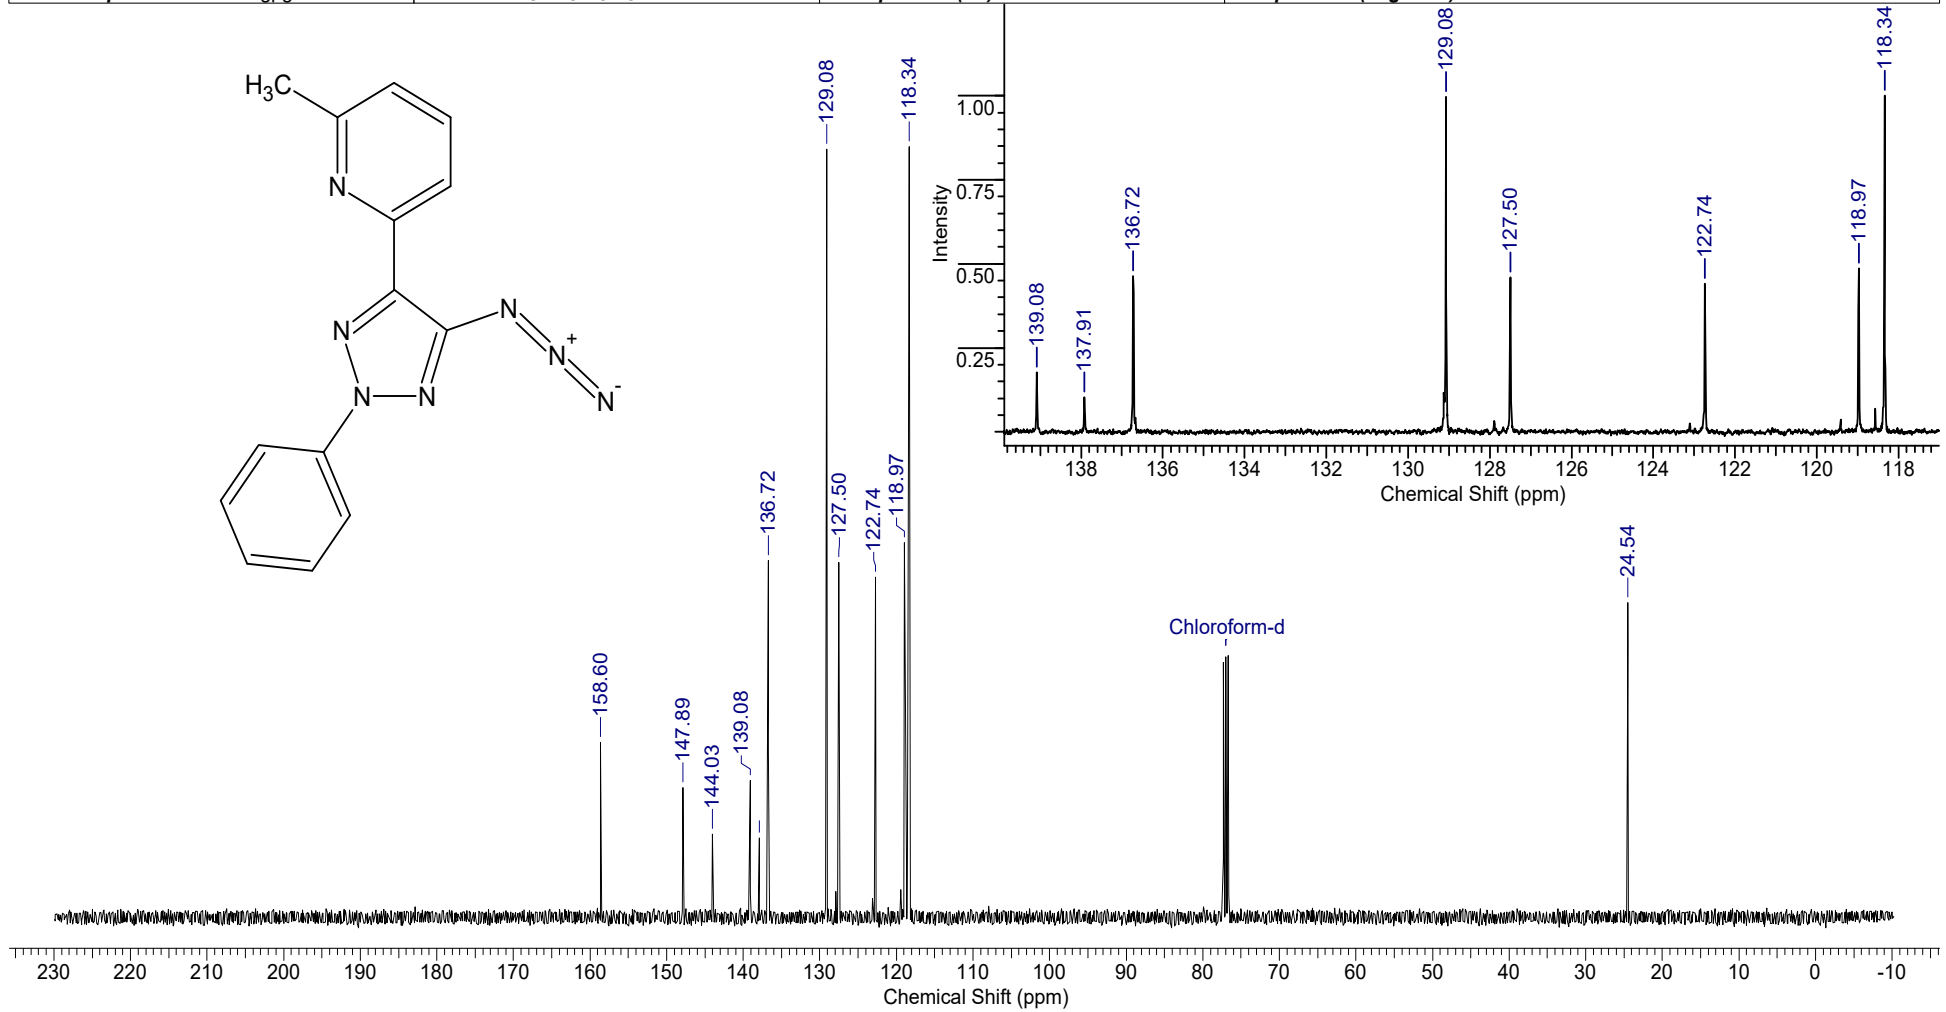



$^{13}\text{C}$  NMR spectrum of **2c** (100.6 MHz,  $\text{CDCl}_3$ )

|                               |        |                             |                      |                              |                         |                      |        |
|-------------------------------|--------|-----------------------------|----------------------|------------------------------|-------------------------|----------------------|--------|
| <b>Acquisition Time (sec)</b> | 4.0894 | <b>Comment</b>              | Imported from UXMNR. |                              | <b>Date</b>             | 30 Jan 2021 13:25:44 |        |
| <b>File Name</b>              |        |                             |                      |                              | <b>Frequency (MHz)</b>  | 400.13               |        |
| <b>Nucleus</b>                | 1H     | <b>Number of Transients</b> | 4                    | <b>Original Points Count</b> | 32768                   | <b>Points Count</b>  | 131072 |
| <b>Pulse Sequence</b>         | zg30   | <b>Solvent</b>              | CHLOROFORM-D         |                              | <b>Sweep Width (Hz)</b> | 8012.82              |        |
| <b>Temperature (degree C)</b> | 27.000 |                             |                      |                              |                         |                      |        |

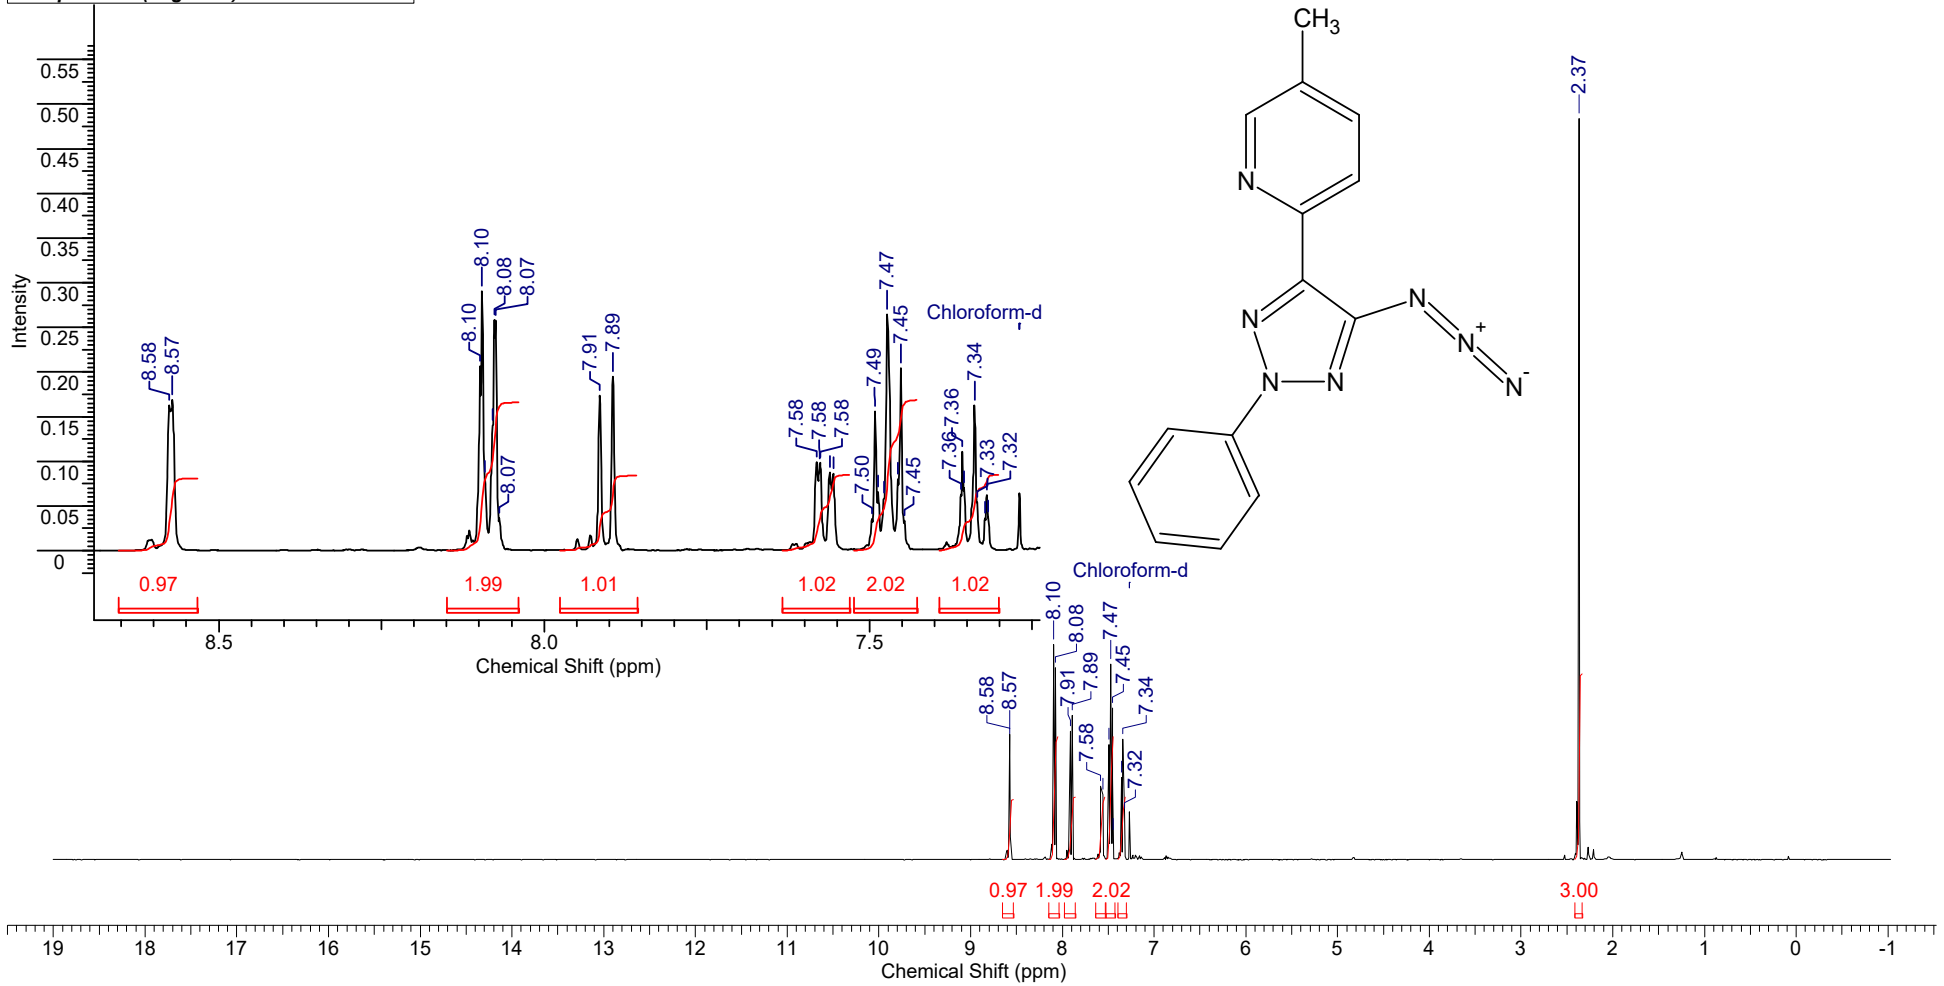

$^1\text{H}$  NMR spectrum of **2d** (400.1 MHz,  $\text{CDCl}_3$ )

|                               |                 |                             |                      |                              |             |                               |        |
|-------------------------------|-----------------|-----------------------------|----------------------|------------------------------|-------------|-------------------------------|--------|
| <b>Acquisition Time (sec)</b> | 0.6783          | <b>Comment</b>              | Imported from UXMNR. |                              | <b>Date</b> | 30 Jan 2021 13:32:36          |        |
| <b>File Name</b>              |                 | <b>Number of Transients</b> | 121                  | <b>Original Points Count</b> | 16384       | <b>Frequency (MHz)</b>        | 100.61 |
| <b>Nucleus</b>                | <sup>13</sup> C | <b>Solvent</b>              | CHLOROFORM-D         | <b>Sweep Width (Hz)</b>      | 24154.59    | <b>Points Count</b>           | 131072 |
| <b>Pulse Sequence</b>         | zgpg30          |                             |                      |                              |             | <b>Temperature (degree C)</b> | 27.000 |

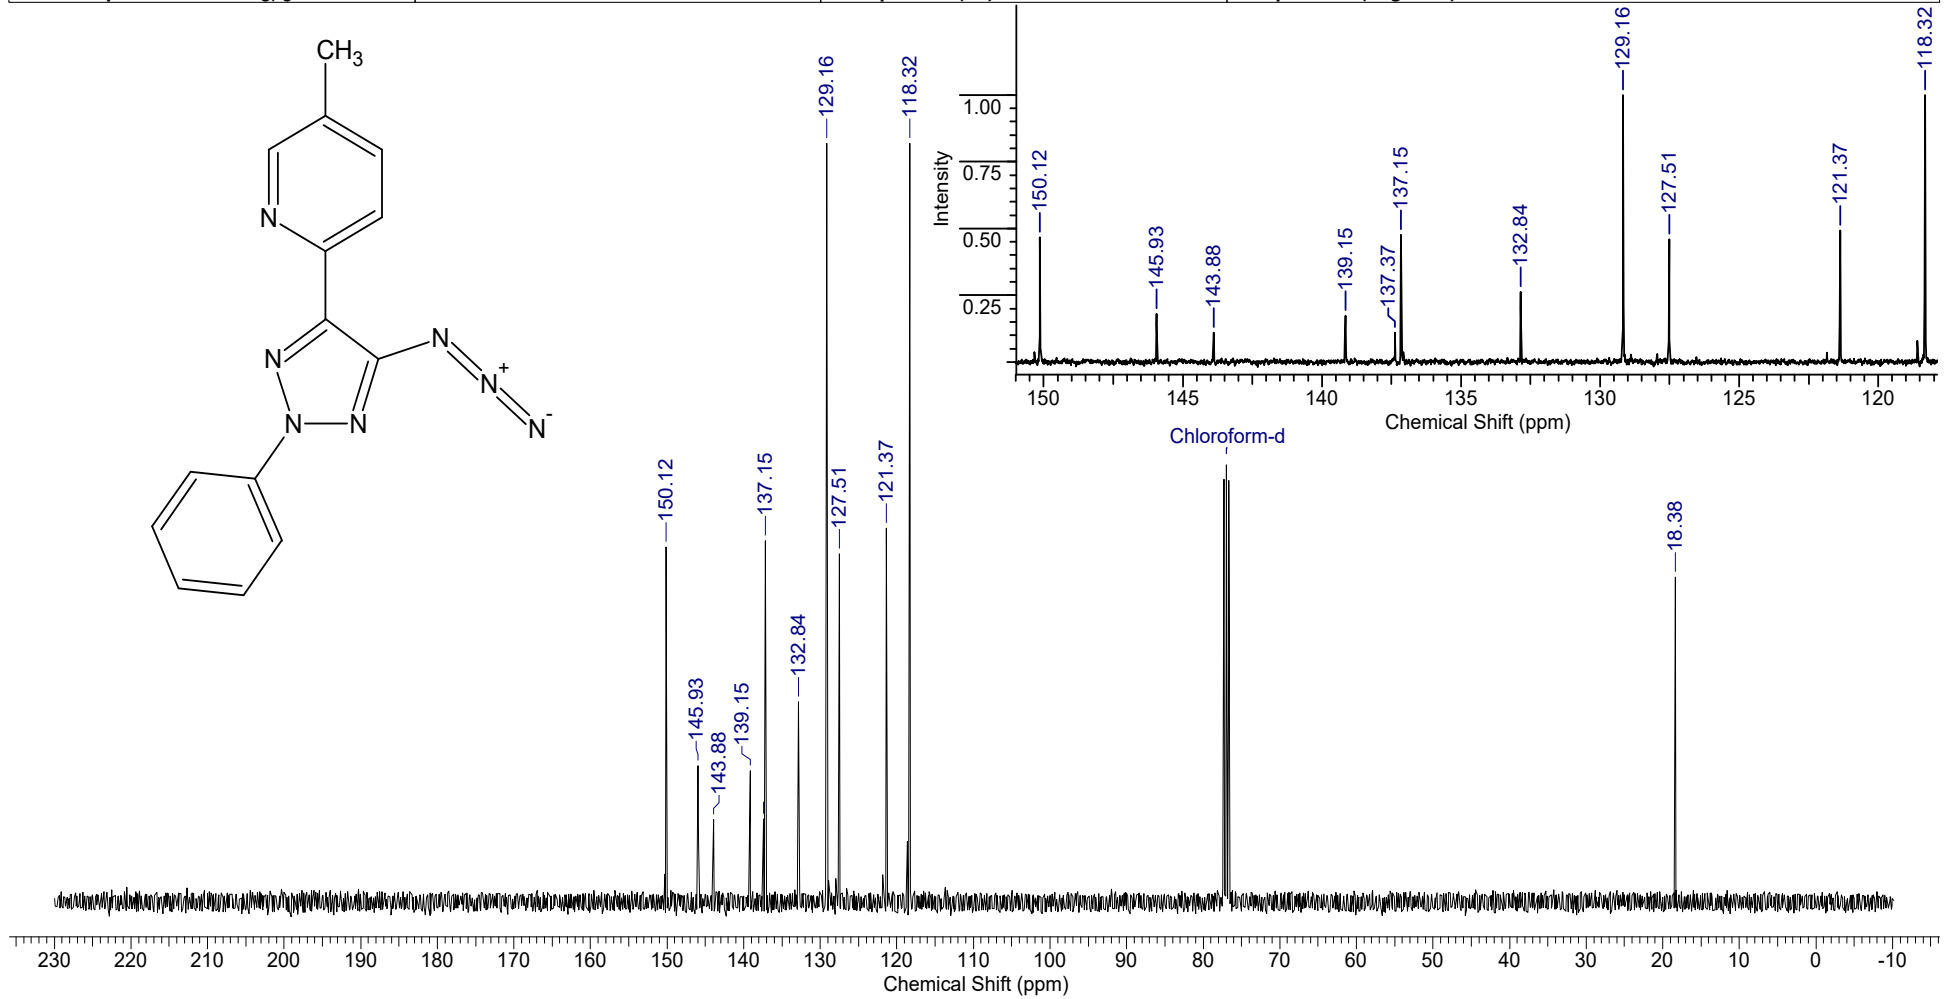

$^{13}\text{C}$  NMR spectrum of **2d** (100.6 MHz,  $\text{CDCl}_3$ )

|                               |        |                             |                      |                              |                         |                      |
|-------------------------------|--------|-----------------------------|----------------------|------------------------------|-------------------------|----------------------|
| <b>Acquisition Time (sec)</b> | 4.0894 | <b>Comment</b>              | Imported from UXNMR. |                              | <b>Date</b>             | 27 Jan 2021 17:54:28 |
| <b>File Name</b>              |        | <b>Number of Transients</b> | 4                    | <b>Original Points Count</b> | <b>Frequency (MHz)</b>  | 400.13               |
| <b>Nucleus</b>                | 1H     | <b>Solvent</b>              | CHLOROFORM-D         |                              | <b>Points Count</b>     | 131072               |
| <b>Pulse Sequence</b>         | zg30   |                             |                      |                              | <b>Sweep Width (Hz)</b> | 8012.82              |
| <b>Temperature (degree C)</b> | 27.000 |                             |                      |                              |                         |                      |

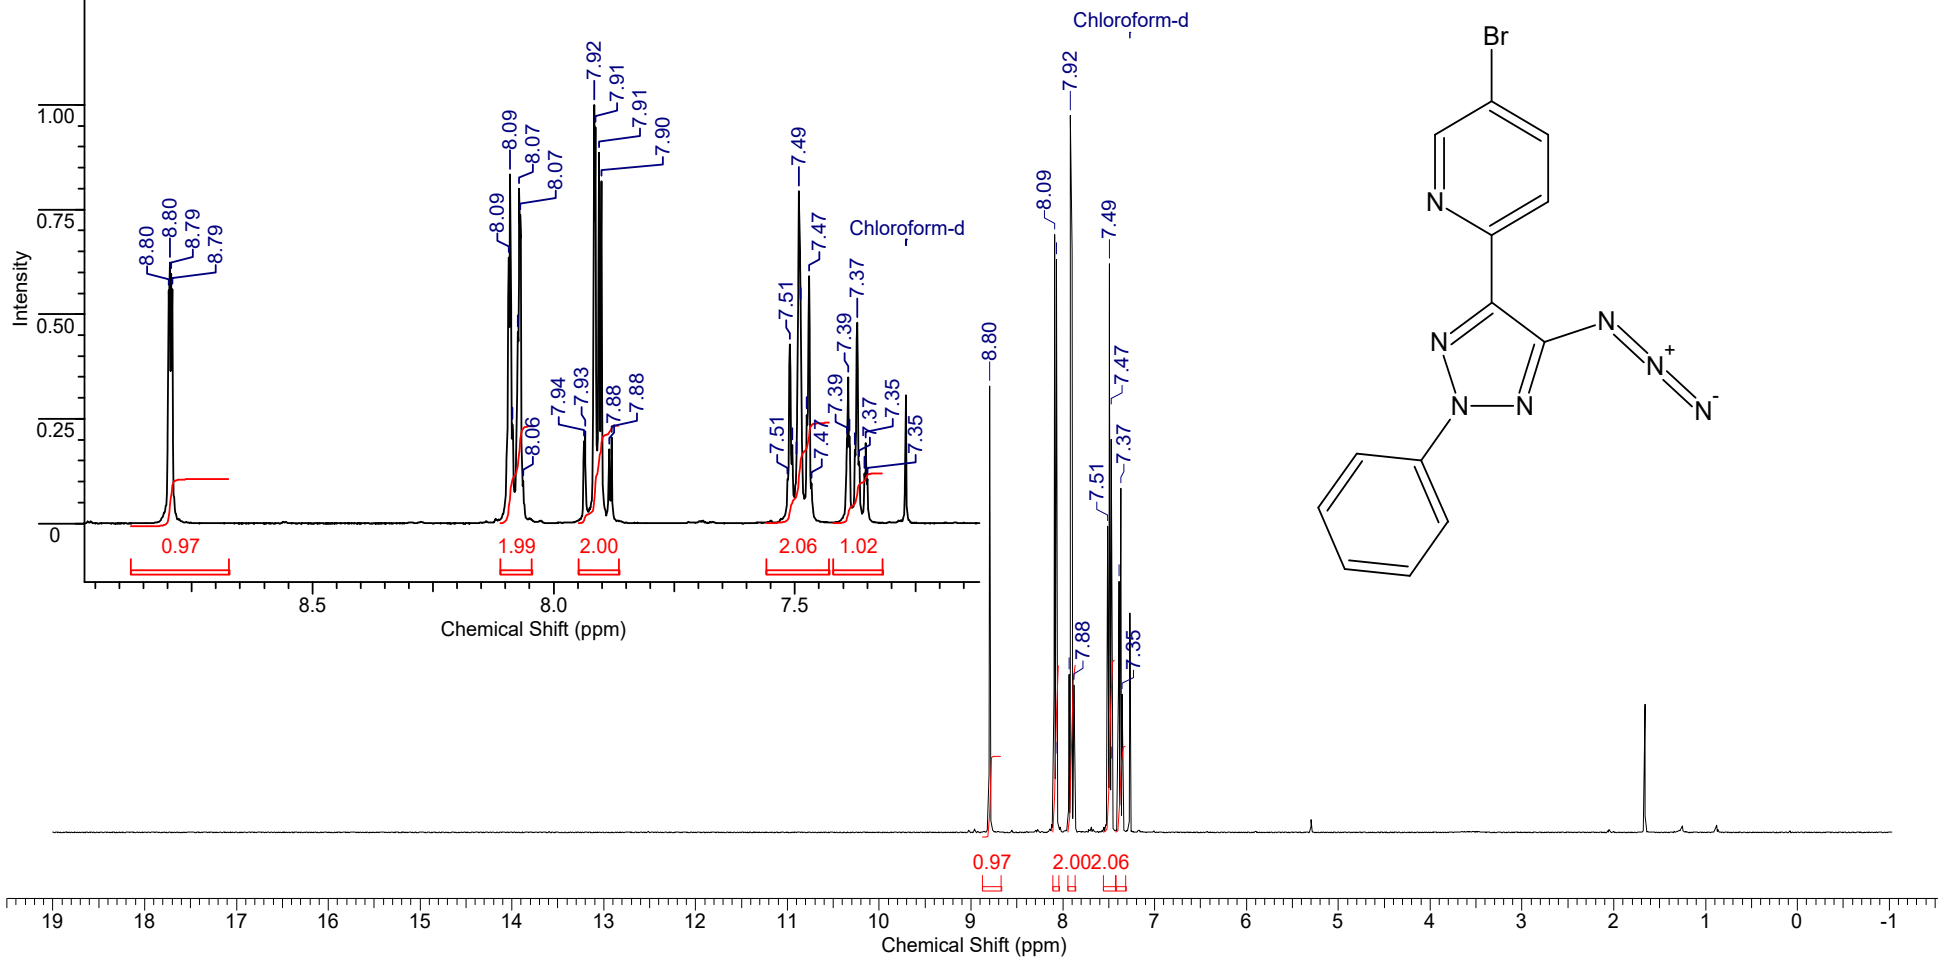

$^1\text{H}$  NMR spectrum of **2e** (400.1 MHz,  $\text{CDCl}_3$ )

|                               |                 |                             |                      |                              |             |                               |        |
|-------------------------------|-----------------|-----------------------------|----------------------|------------------------------|-------------|-------------------------------|--------|
| <b>Acquisition Time (sec)</b> | 0.6783          | <b>Comment</b>              | Imported from UXMNR. |                              | <b>Date</b> | 27 Jan 2021 17:58:20          |        |
| <b>File Name</b>              |                 | <b>Number of Transients</b> | 81                   | <b>Original Points Count</b> | 16384       | <b>Frequency (MHz)</b>        | 100.61 |
| <b>Nucleus</b>                | <sup>13</sup> C | <b>Solvent</b>              | CHLOROFORM-D         | <b>Sweep Width (Hz)</b>      | 24154.59    | <b>Points Count</b>           | 131072 |
| <b>Pulse Sequence</b>         | zgpg30          |                             |                      |                              |             | <b>Temperature (degree C)</b> | 27.000 |

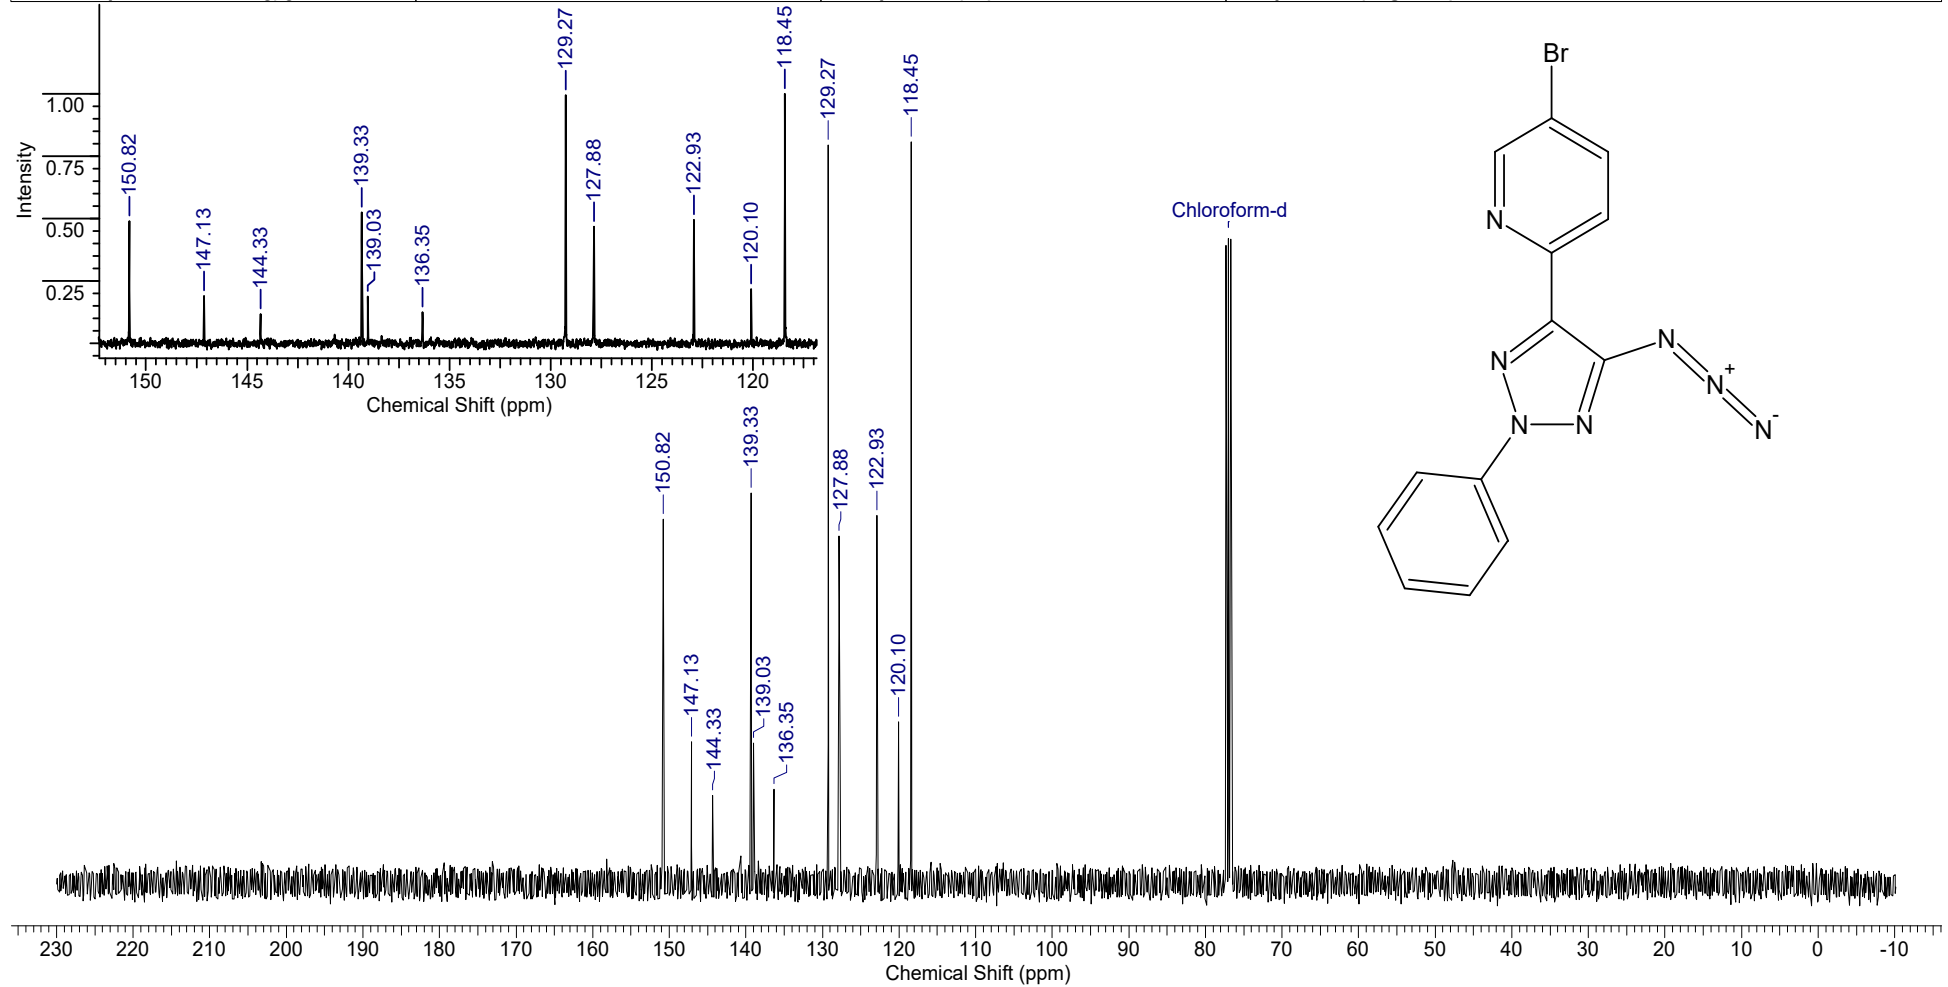



$^{13}\text{C}$  NMR spectrum of **2e** (100.6 MHz,  $\text{CDCl}_3$ )

|                               |                |                               |                      |                              |                         |                        |        |
|-------------------------------|----------------|-------------------------------|----------------------|------------------------------|-------------------------|------------------------|--------|
| <b>Acquisition Time (sec)</b> | 4.0894         | <b>Comment</b>                | Imported from UXMNR. |                              | <b>Date</b>             | 27 Jan 2021 17:41:14   |        |
| <b>File Name</b>              |                | <b>Number of Transients</b>   | 4                    | <b>Original Points Count</b> | 32768                   | <b>Frequency (MHz)</b> | 400.13 |
| <b>Nucleus</b>                | <sup>1</sup> H | <b>Solvent</b>                | CHLOROFORM-D         |                              | <b>Points Count</b>     | 131072                 |        |
| <b>Pulse Sequence</b>         | zg30           | <b>Temperature (degree C)</b> | 27.000               |                              | <b>Sweep Width (Hz)</b> | 8012.82                |        |

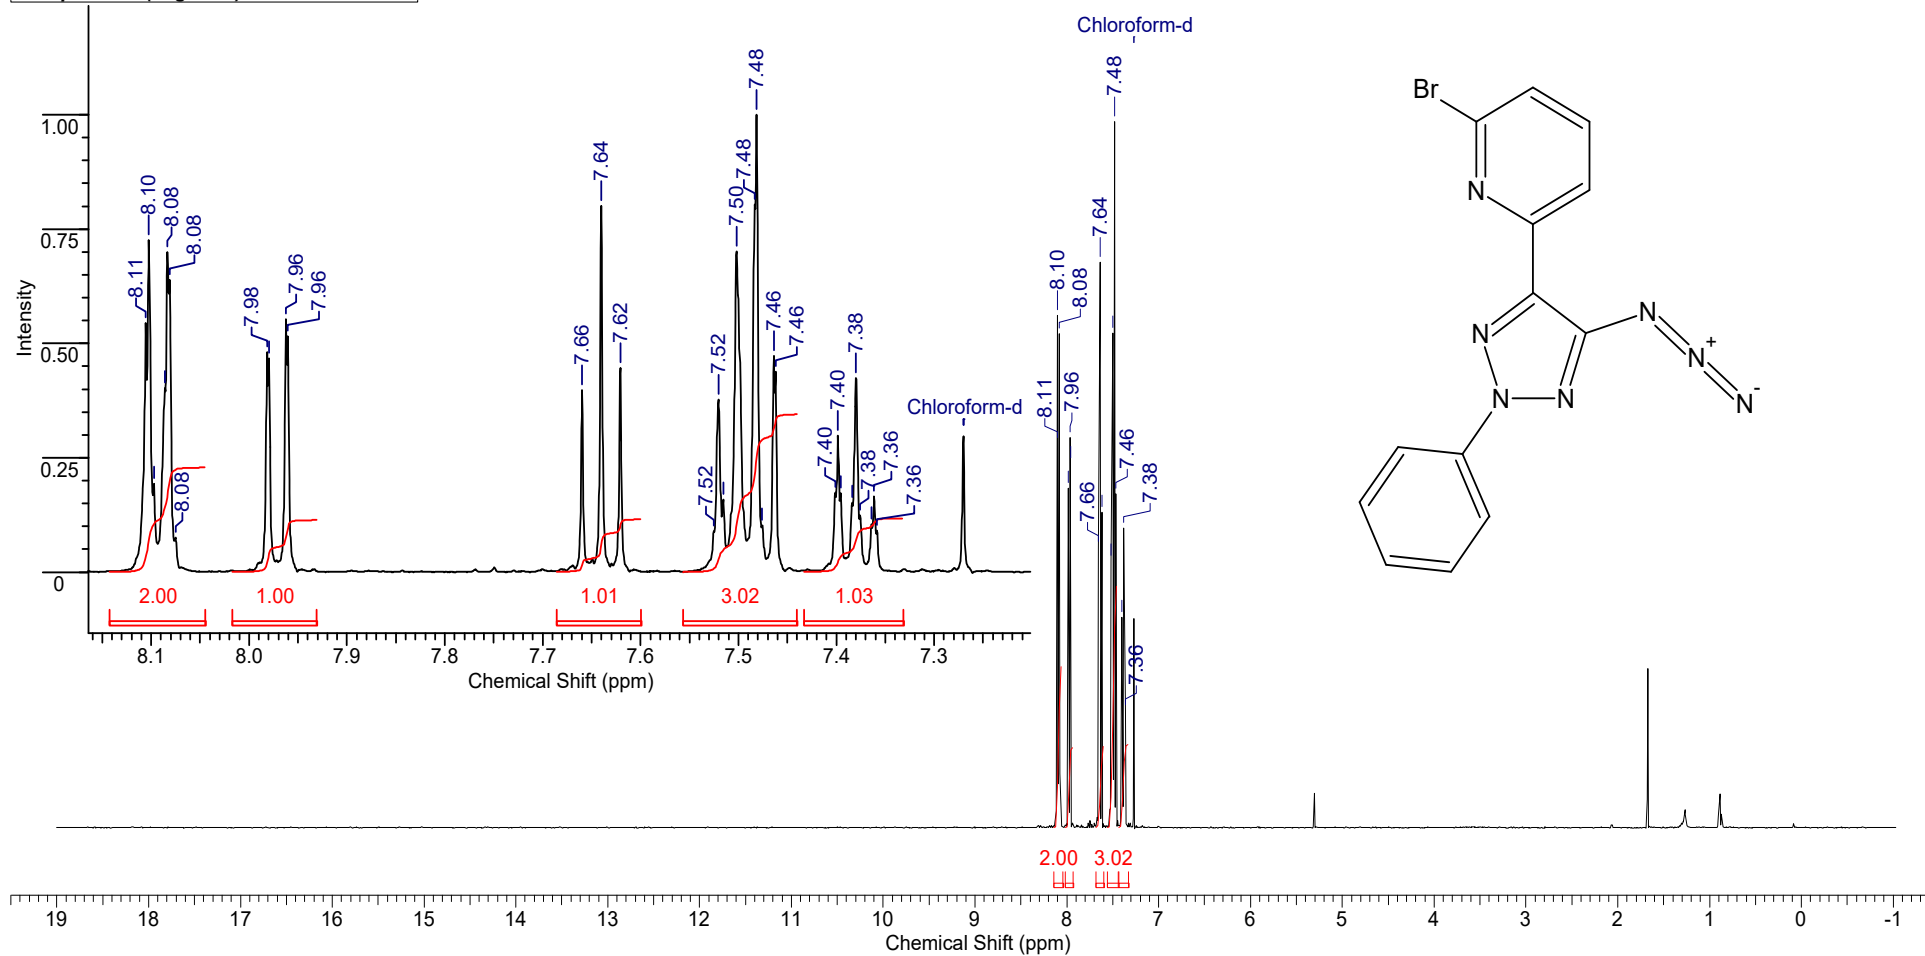



$^{13}\text{C}$  NMR spectrum of **2f** (100.6 MHz,  $\text{CDCl}_3$ )

|                               |                |                               |                      |                              |                         |                      |
|-------------------------------|----------------|-------------------------------|----------------------|------------------------------|-------------------------|----------------------|
| <b>Acquisition Time (sec)</b> | 4.0894         | <b>Comment</b>                | Imported from UXMNR. |                              | <b>Date</b>             | 06 Mar 2020 15:35:38 |
| <b>File Name</b>              |                | <b>Number of Transients</b>   | 4                    | <b>Original Points Count</b> | <b>Frequency (MHz)</b>  | 400.13               |
| <b>Nucleus</b>                | <sup>1</sup> H | <b>Solvent</b>                | CHLOROFORM-D         |                              | <b>Points Count</b>     | 131072               |
| <b>Pulse Sequence</b>         | zg30           | <b>Temperature (degree C)</b> | 27.000               |                              | <b>Sweep Width (Hz)</b> | 8012.82              |

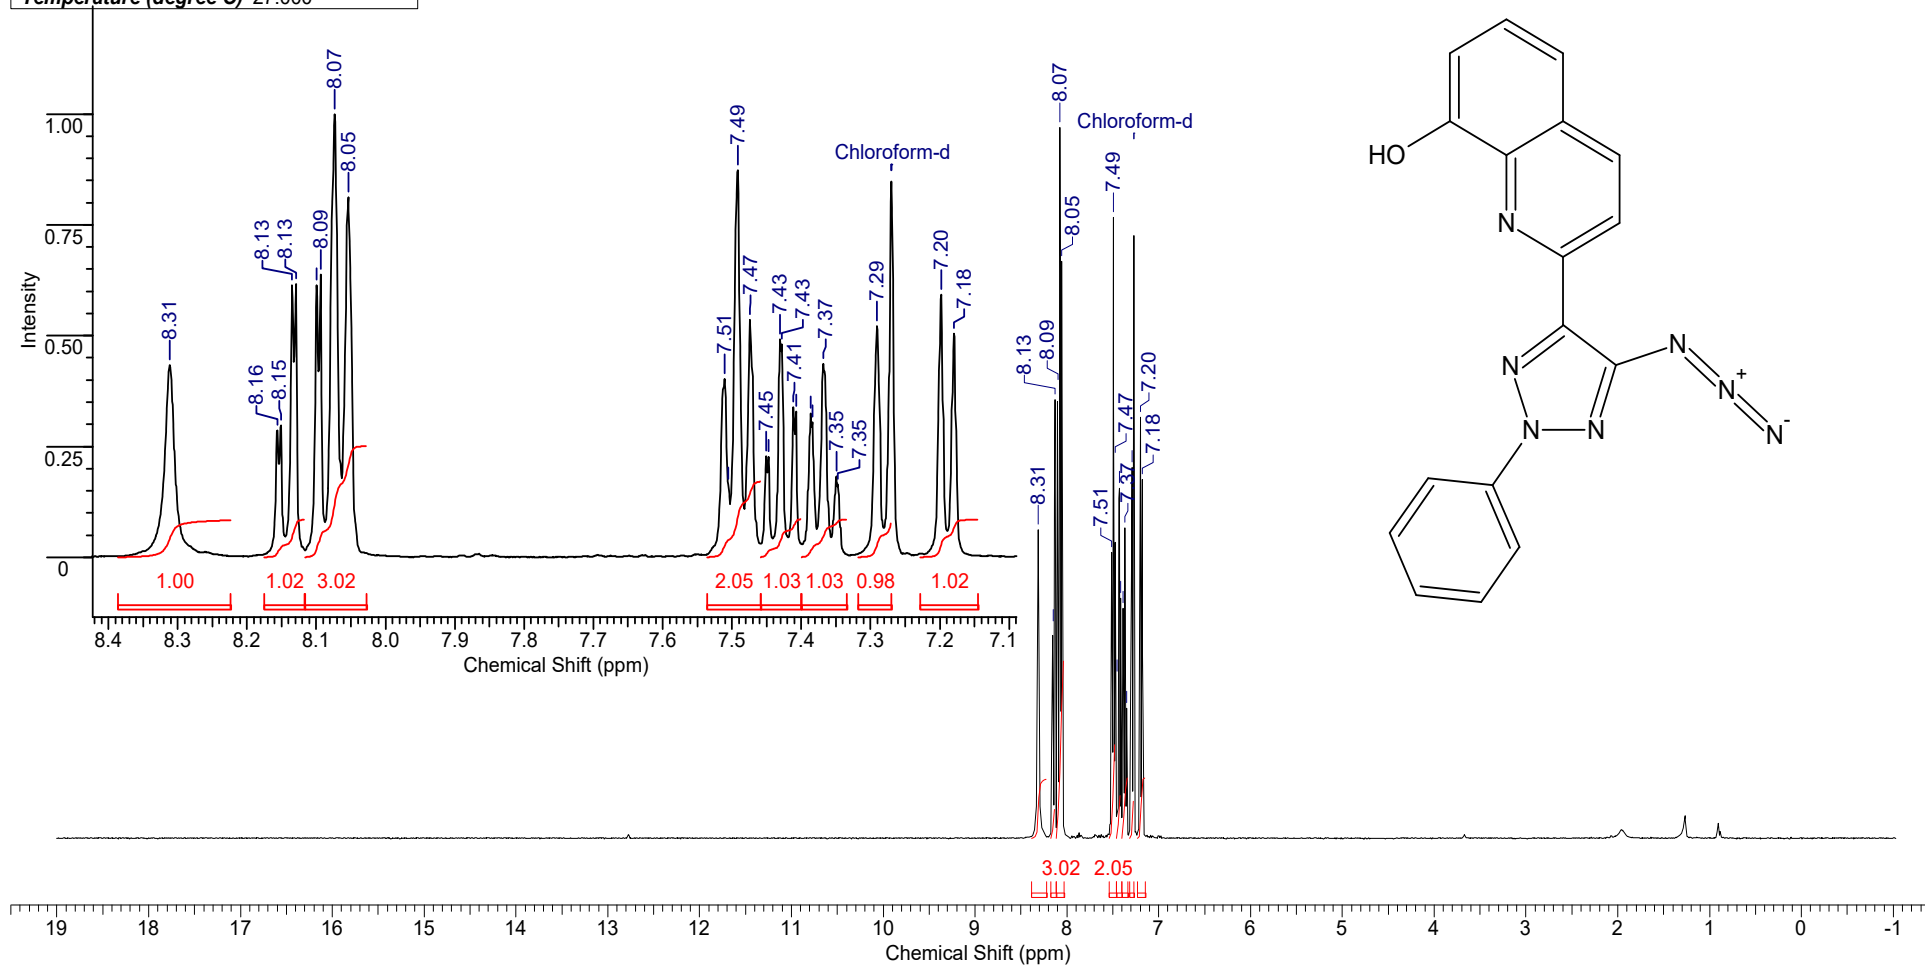

$^1\text{H}$  NMR spectrum of **2g** (400.1 MHz,  $\text{CDCl}_3$ )

|                               |                 |                             |                      |                              |             |                               |        |
|-------------------------------|-----------------|-----------------------------|----------------------|------------------------------|-------------|-------------------------------|--------|
| <b>Acquisition Time (sec)</b> | 0.6783          | <b>Comment</b>              | Imported from UXNMR. |                              | <b>Date</b> | 06 Mar 2020 15:38:26          |        |
| <b>File Name</b>              |                 | <b>Number of Transients</b> | 57                   | <b>Original Points Count</b> | 16384       | <b>Frequency (MHz)</b>        | 100.61 |
| <b>Nucleus</b>                | <sup>13</sup> C | <b>Solvent</b>              | CHLOROFORM-D         | <b>Sweep Width (Hz)</b>      | 24154.59    | <b>Points Count</b>           | 131072 |
| <b>Pulse Sequence</b>         | zgpg30          |                             |                      |                              |             | <b>Temperature (degree C)</b> | 27.000 |

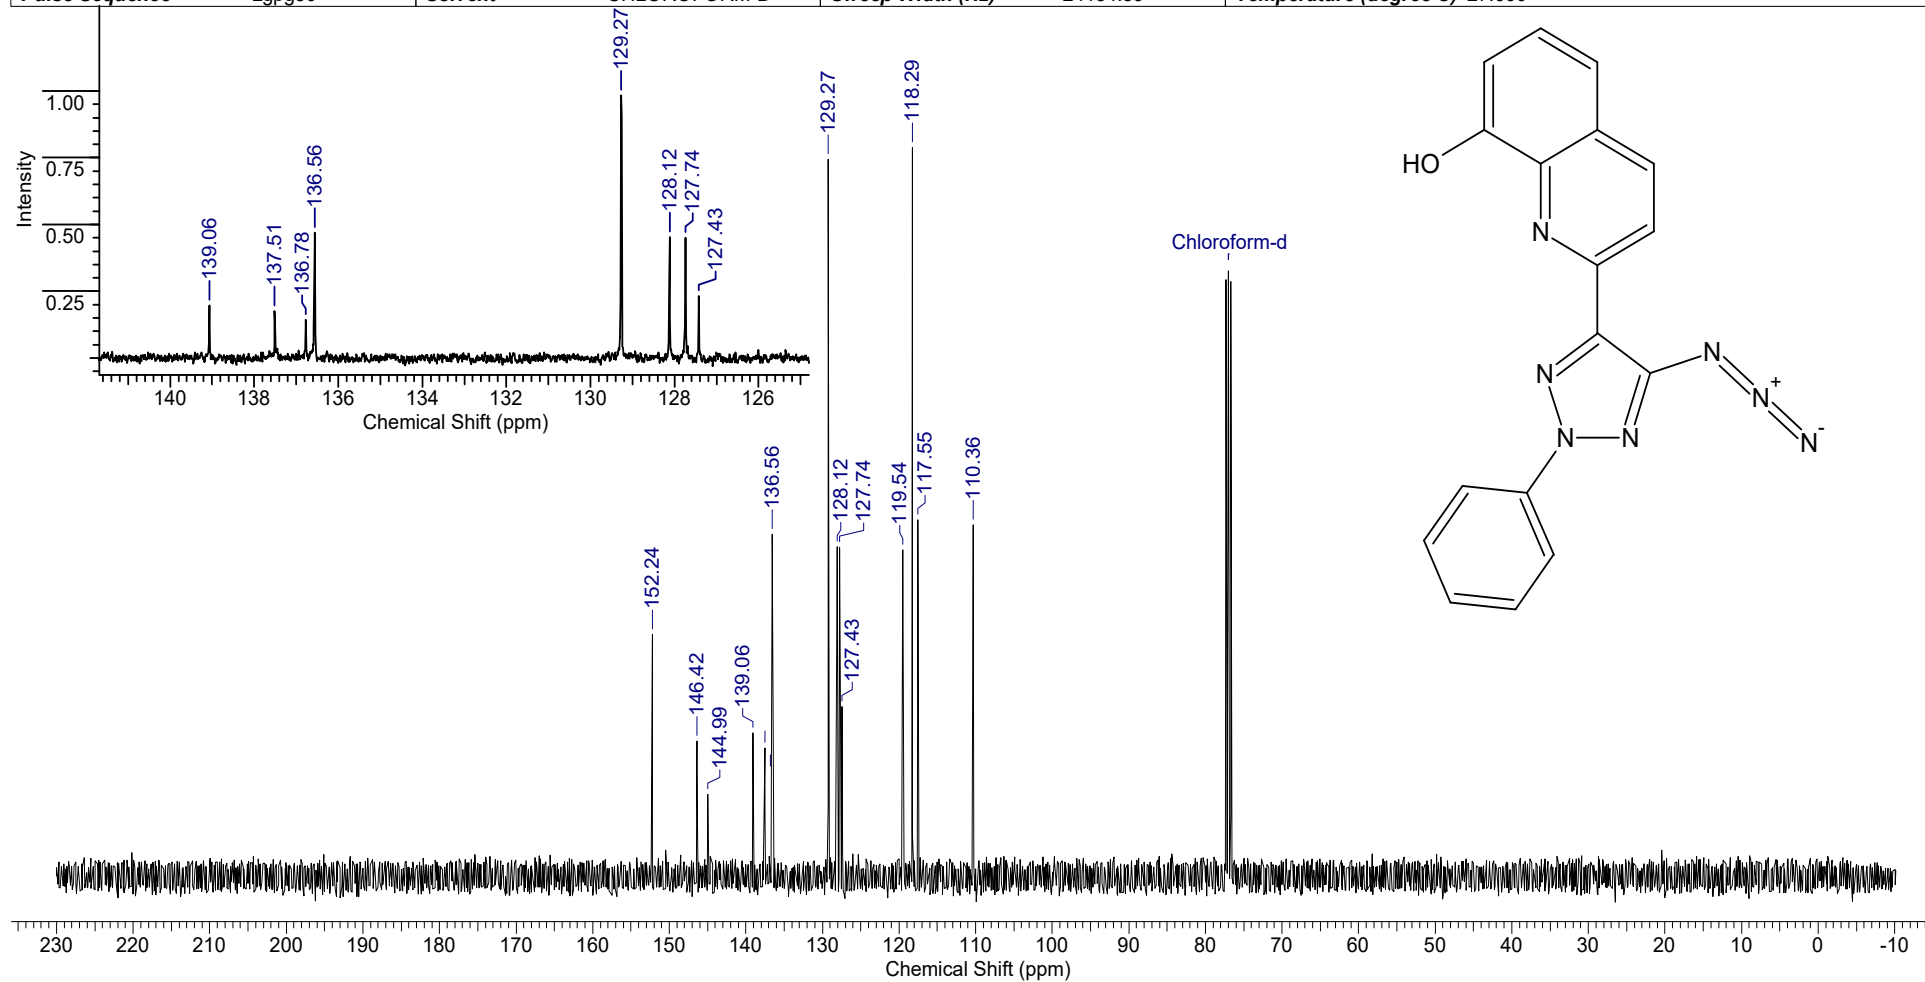

$^{13}\text{C}$  NMR spectrum of **2g** (100.6 MHz,  $\text{CDCl}_3$ )



|                               |        |                             |                      |                              |                      |
|-------------------------------|--------|-----------------------------|----------------------|------------------------------|----------------------|
| <b>Acquisition Time (sec)</b> | 4.0894 | <b>Comment</b>              | Imported from UXNMR. | <b>Date</b>                  | 25 Sep 2020 15:37:04 |
| <b>File Name</b>              |        | <b>Number of Transients</b> | 4                    | <b>Original Points Count</b> | 32768                |
| <b>Nucleus</b>                | 1H     | <b>Solvent</b>              | CHLOROFORM-D         | <b>Frequency (MHz)</b>       | 400.13               |
| <b>Pulse Sequence</b>         | zg30   |                             |                      | <b>Points Count</b>          | 131072               |
| <b>Temperature (degree C)</b> | 27.000 |                             |                      | <b>Sweep Width (Hz)</b>      | 8012.82              |

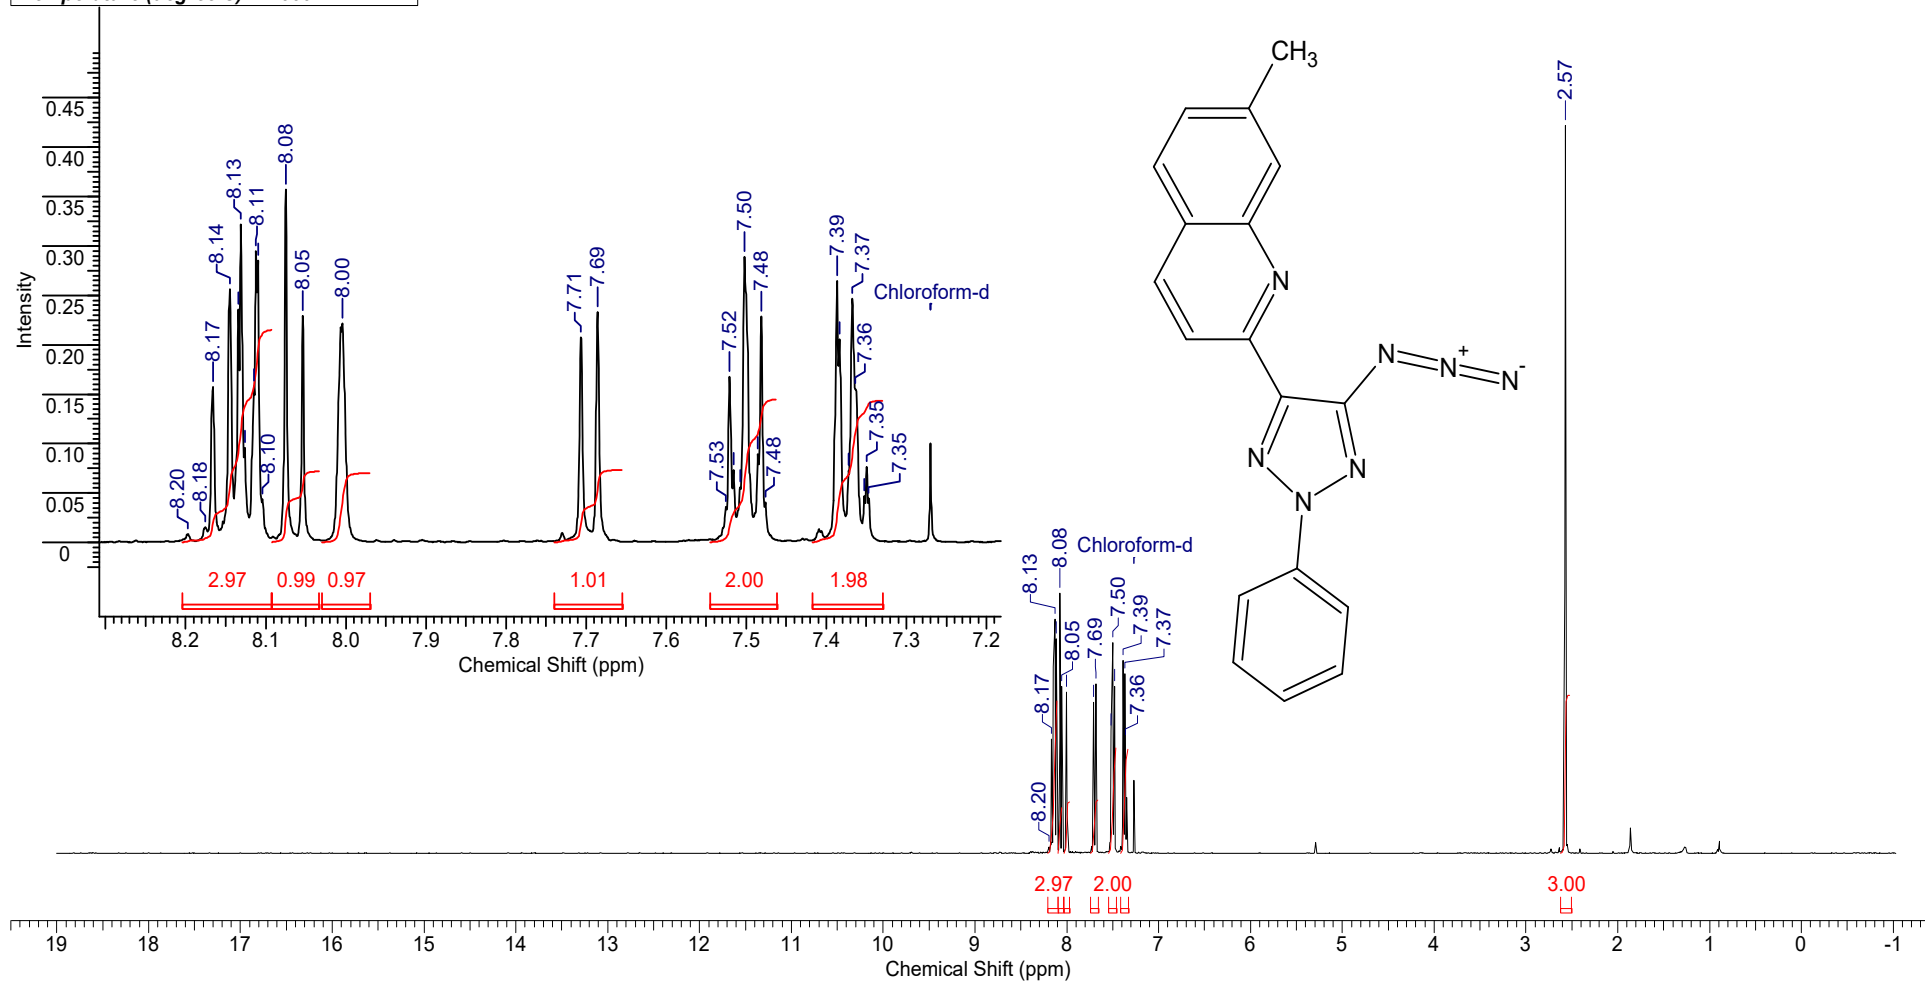

$^1\text{H}$  NMR spectrum of **2h** (400.1 MHz,  $\text{CDCl}_3$ )

|                               |                 |                             |                      |                              |                        |                               |        |
|-------------------------------|-----------------|-----------------------------|----------------------|------------------------------|------------------------|-------------------------------|--------|
| <b>Acquisition Time (sec)</b> | 0.6783          | <b>Comment</b>              | Imported from UXNMR. |                              | <b>Date</b>            | 25 Sep 2020 15:41:38          |        |
| <b>File Name</b>              |                 |                             |                      |                              | <b>Frequency (MHz)</b> | 100.61                        |        |
| <b>Nucleus</b>                | <sup>13</sup> C | <b>Number of Transients</b> | 65                   | <b>Original Points Count</b> | 16384                  | <b>Points Count</b>           | 131072 |
| <b>Pulse Sequence</b>         | zgpg30          | <b>Solvent</b>              | CHLOROFORM-D         | <b>Sweep Width (Hz)</b>      | 24154.59               | <b>Temperature (degree C)</b> | 27.000 |

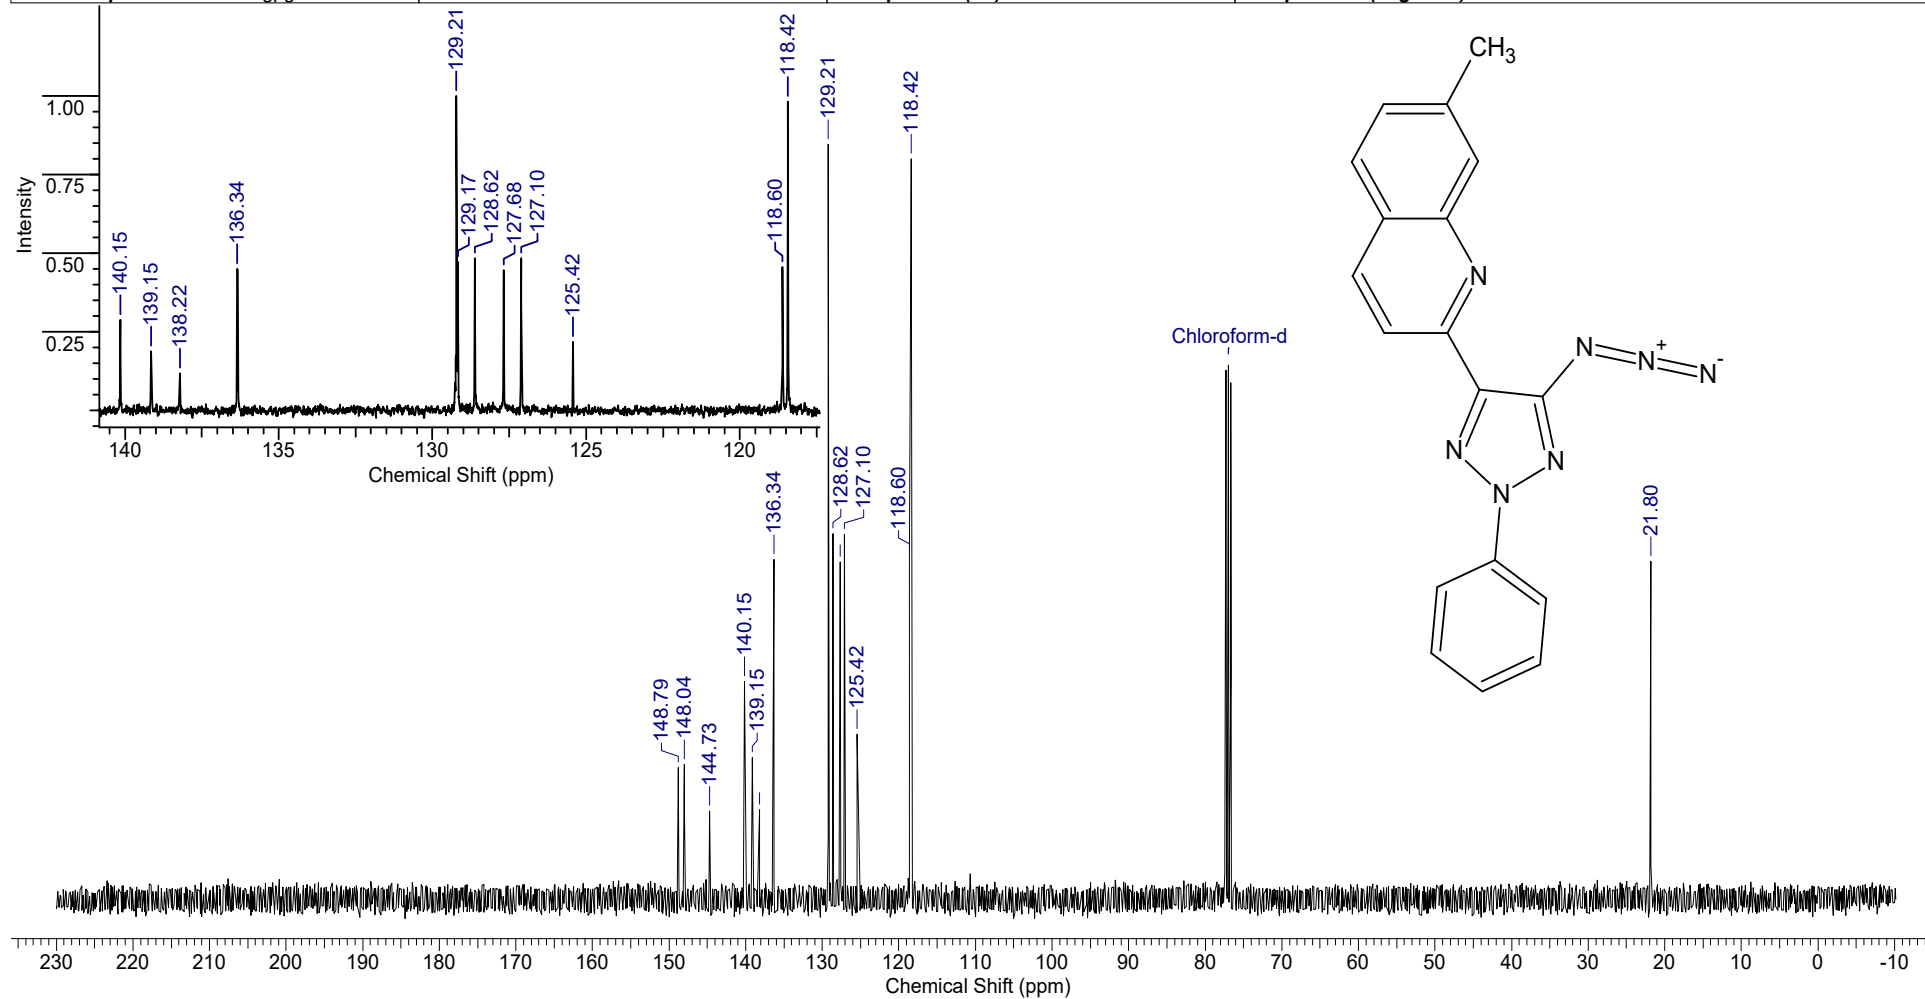

$^{13}\text{C}$  NMR spectrum of **2h** (100.6 MHz,  $\text{CDCl}_3$ )

|                               |                |                               |                      |                              |                         |                      |
|-------------------------------|----------------|-------------------------------|----------------------|------------------------------|-------------------------|----------------------|
| <b>Acquisition Time (sec)</b> | 4.0894         | <b>Comment</b>                | Imported from UXNMR. |                              | <b>Date</b>             | 14 Dec 2020 15:29:34 |
| <b>File Name</b>              |                | <b>Number of Transients</b>   | 4                    | <b>Original Points Count</b> | <b>Frequency (MHz)</b>  | 400.13               |
| <b>Nucleus</b>                | <sup>1</sup> H | <b>Solvent</b>                | CHLOROFORM-D         |                              | <b>Points Count</b>     | 131072               |
| <b>Pulse Sequence</b>         | zg30           | <b>Temperature (degree C)</b> | 27.000               |                              | <b>Sweep Width (Hz)</b> | 8012.82              |

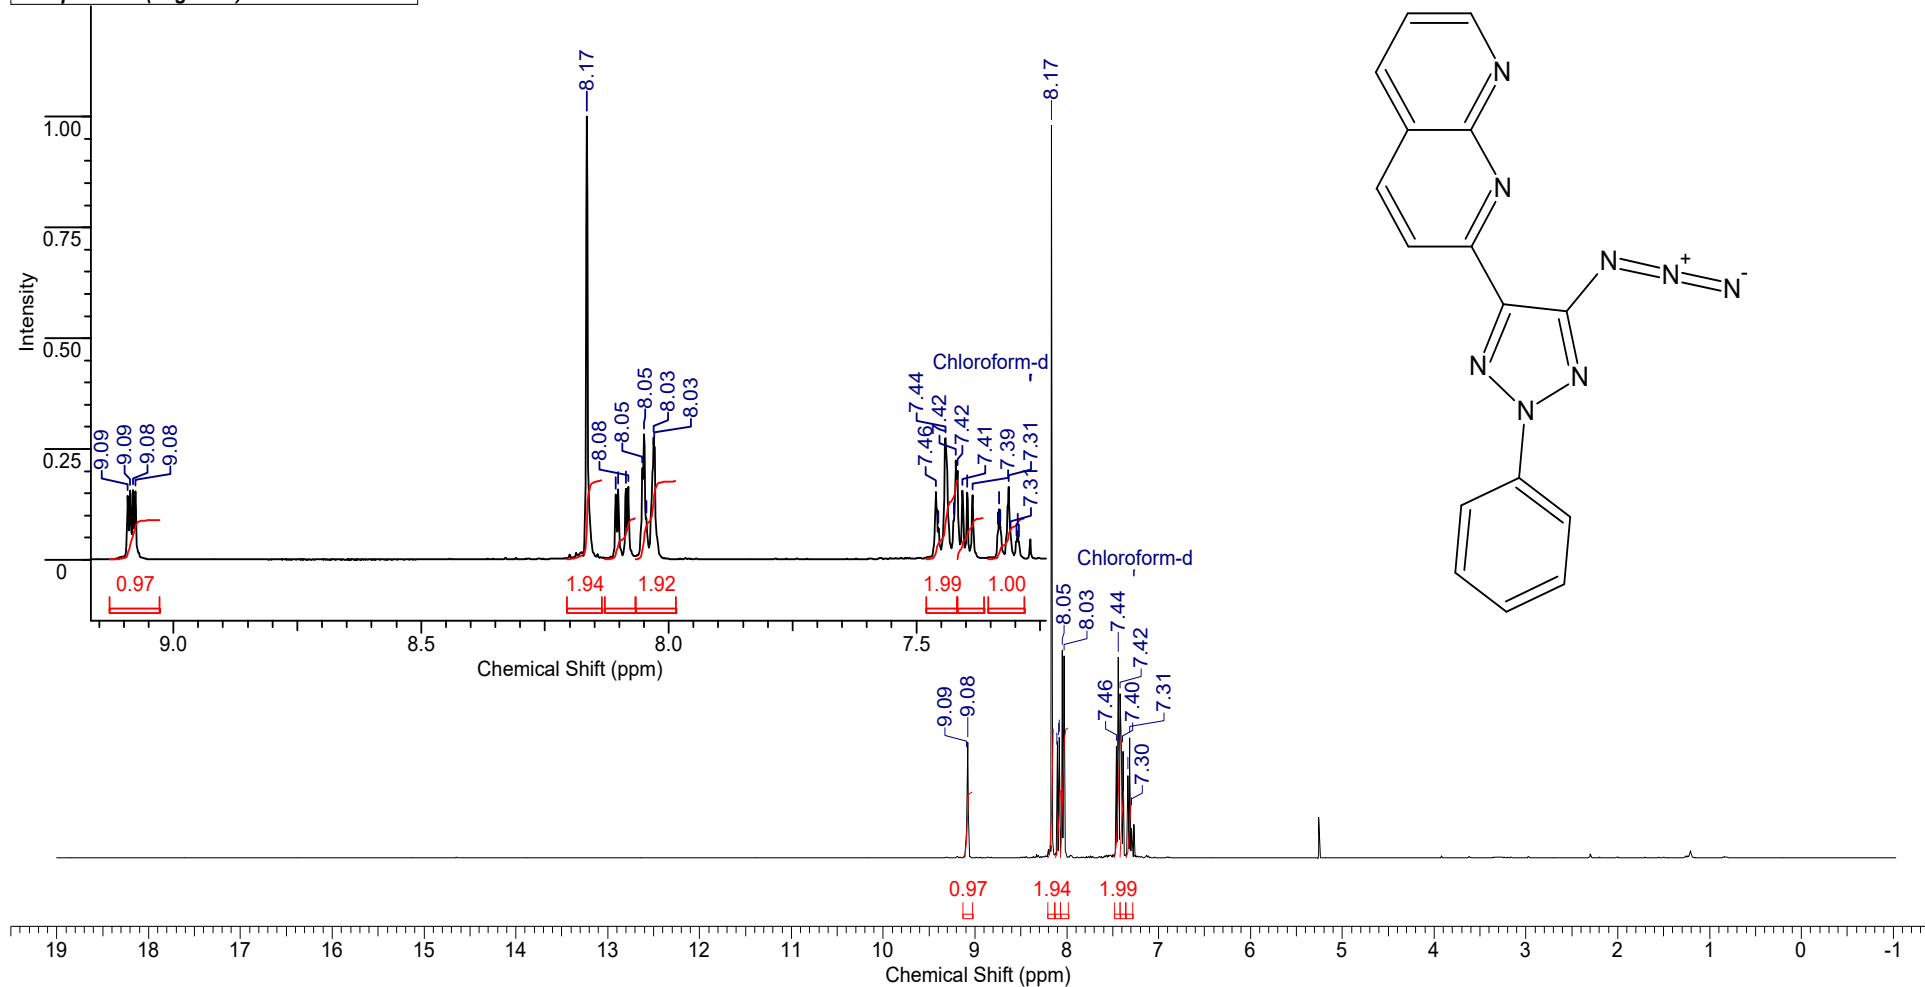

$^1\text{H}$  NMR spectrum of **2i** (400.1 MHz,  $\text{CDCl}_3$ )

|                               |        |                             |                      |                              |             |                               |        |
|-------------------------------|--------|-----------------------------|----------------------|------------------------------|-------------|-------------------------------|--------|
| <b>Acquisition Time (sec)</b> | 0.6783 | <b>Comment</b>              | Imported from UXMNR. |                              | <b>Date</b> | 14 Dec 2020 15:33:44          |        |
| <b>File Name</b>              |        | <b>Number of Transients</b> | 57                   | <b>Original Points Count</b> | 16384       | <b>Frequency (MHz)</b>        | 100.61 |
| <b>Nucleus</b>                | 13C    | <b>Points Count</b>         |                      | <b>Sweep Width (Hz)</b>      | 24154.59    | <b>Temperature (degree C)</b> | 27.000 |
| <b>Pulse Sequence</b>         | zgpg30 | <b>Solvent</b>              | CHLOROFORM-D         |                              |             |                               |        |

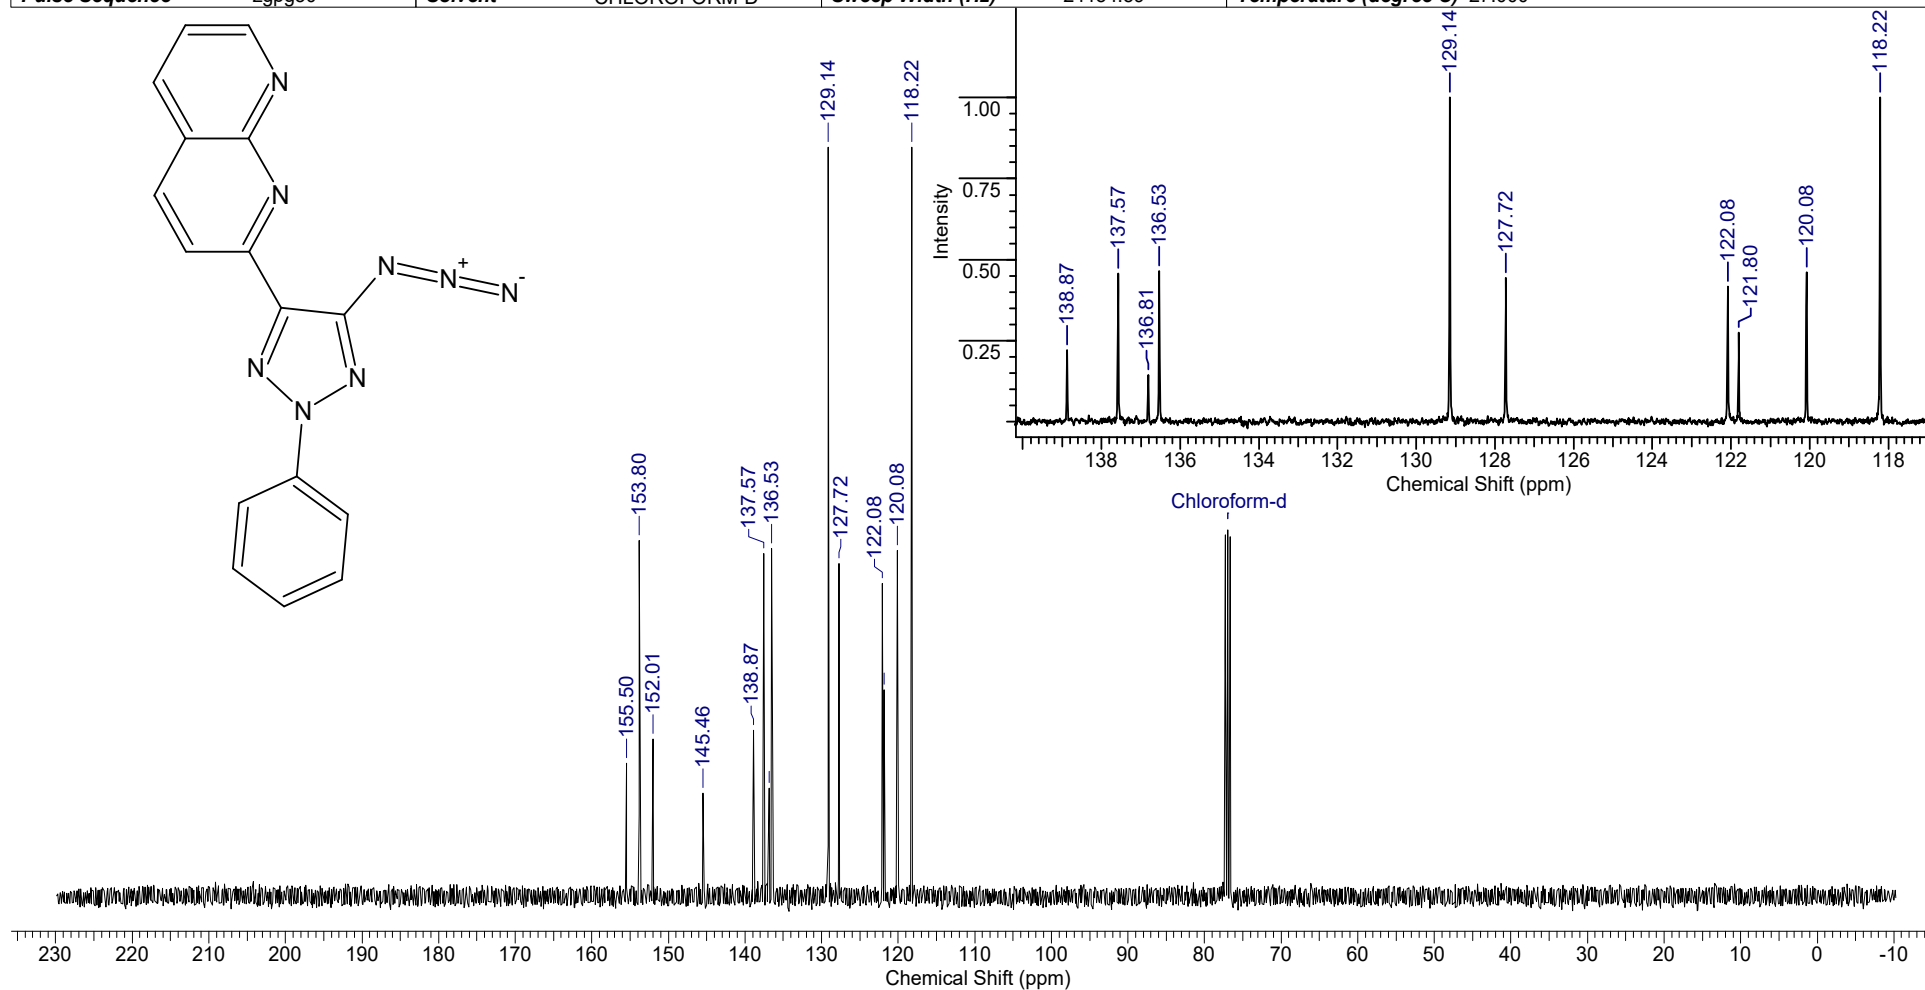

$^{13}\text{C}$  NMR spectrum of **2i** (100.6 MHz,  $\text{CDCl}_3$ )



|                               |                |                             |                      |                              |                      |
|-------------------------------|----------------|-----------------------------|----------------------|------------------------------|----------------------|
| <b>Acquisition Time (sec)</b> | 4.0894         | <b>Comment</b>              | Imported from UXNMR. | <b>Date</b>                  | 02 Mar 2020 15:41:50 |
| <b>File Name</b>              |                | <b>Number of Transients</b> | 4                    | <b>Original Points Count</b> | 32768                |
| <b>Nucleus</b>                | <sup>1</sup> H | <b>Solvent</b>              | CHLOROFORM-D         | <b>Frequency (MHz)</b>       | 400.13               |
| <b>Pulse Sequence</b>         | zg30           |                             |                      | <b>Points Count</b>          | 131072               |
| <b>Temperature (degree C)</b> | 27.000         |                             |                      | <b>Sweep Width (Hz)</b>      | 8012.82              |

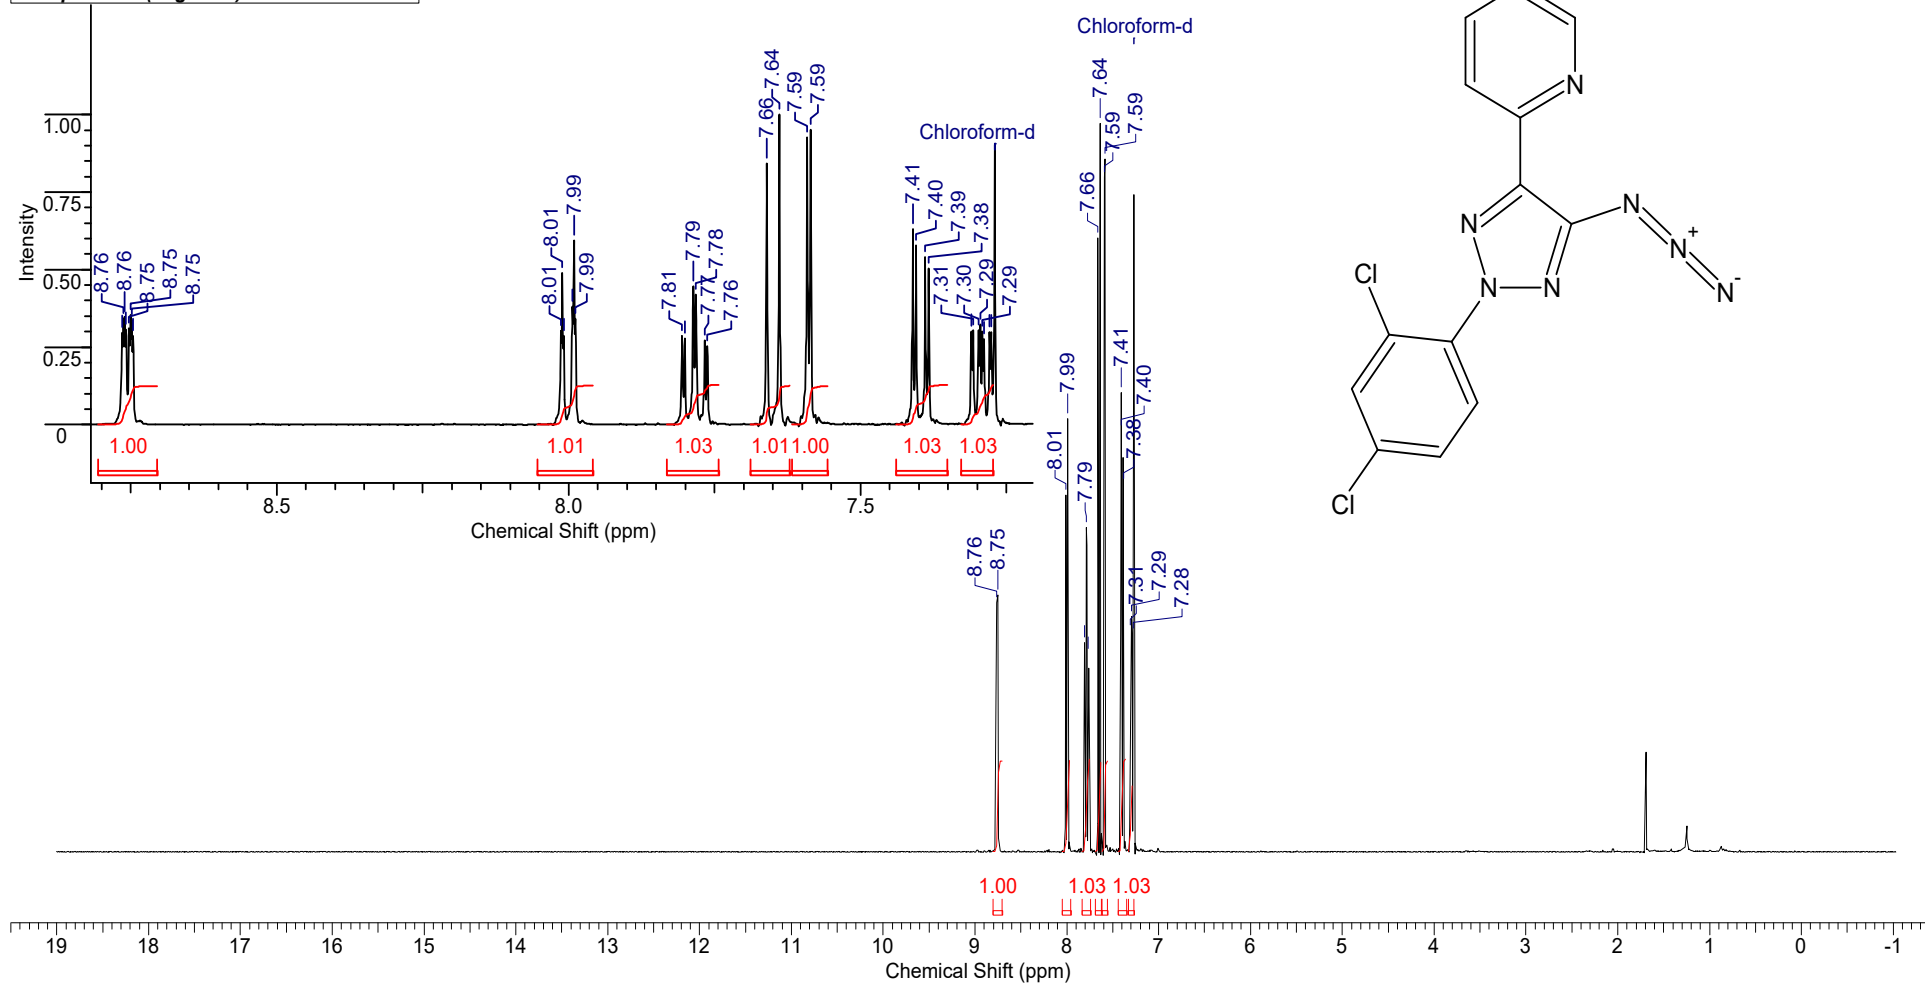

$^1\text{H}$  NMR spectrum of **2j** (400.1 MHz,  $\text{CDCl}_3$ )

|                               |        |                             |                      |                              |                        |                               |        |
|-------------------------------|--------|-----------------------------|----------------------|------------------------------|------------------------|-------------------------------|--------|
| <b>Acquisition Time (sec)</b> | 0.6783 | <b>Comment</b>              | Imported from UXMNR. |                              | <b>Date</b>            | 28 Feb 2020 15:43:08          |        |
| <b>File Name</b>              |        |                             |                      |                              | <b>Frequency (MHz)</b> | 100.61                        |        |
| <b>Nucleus</b>                | 13C    | <b>Number of Transients</b> | 82                   | <b>Original Points Count</b> | 16384                  | <b>Points Count</b>           | 131072 |
| <b>Pulse Sequence</b>         | zgpg30 | <b>Solvent</b>              | CHLOROFORM-D         | <b>Sweep Width (Hz)</b>      | 24154.59               | <b>Temperature (degree C)</b> | 27.000 |

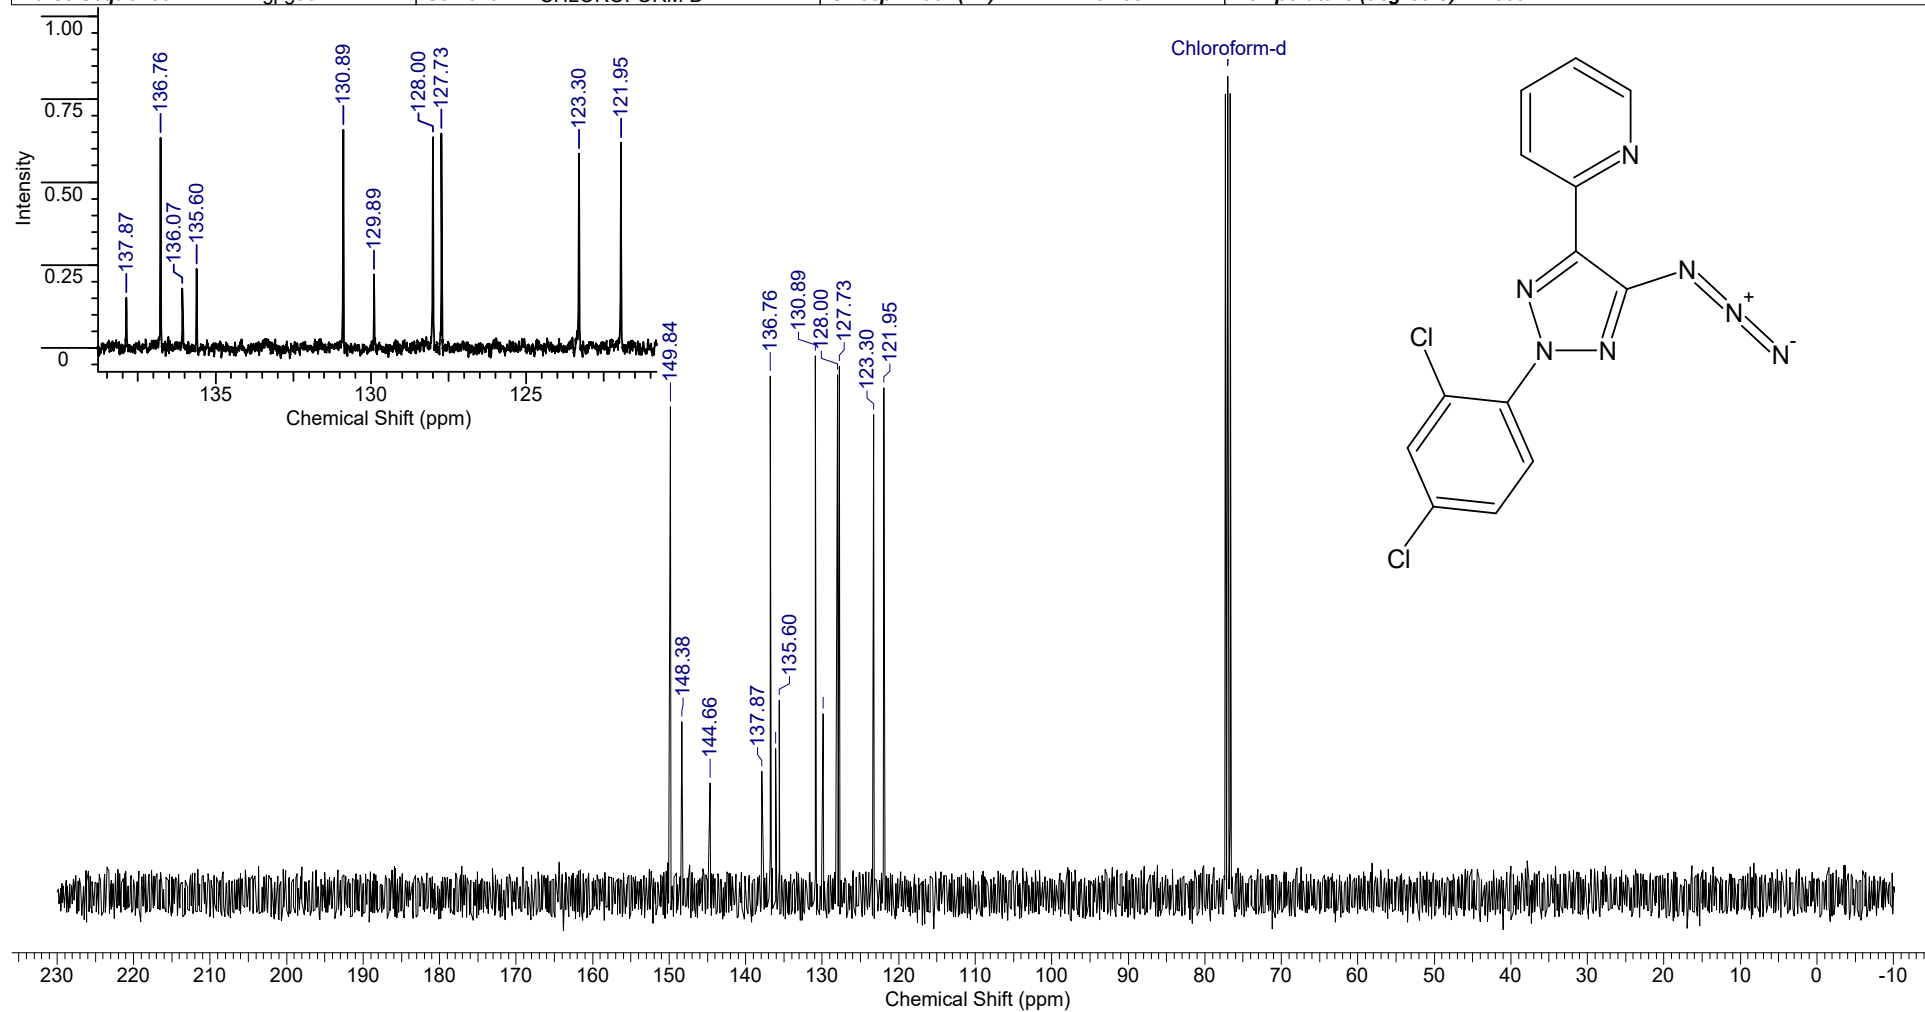

$^{13}\text{C}$  NMR spectrum of **2j** (100.6 MHz,  $\text{CDCl}_3$ )

|                               |                |                             |                      |                              |                      |
|-------------------------------|----------------|-----------------------------|----------------------|------------------------------|----------------------|
| <b>Acquisition Time (sec)</b> | 4.0894         | <b>Comment</b>              | Imported from UXNMR. | <b>Date</b>                  | 11 Feb 2021 11:25:24 |
| <b>File Name</b>              |                |                             |                      | <b>Frequency (MHz)</b>       | 400.13               |
| <b>Nucleus</b>                | <sup>1</sup> H | <b>Number of Transients</b> | 4                    | <b>Original Points Count</b> | 32768                |
| <b>Pulse Sequence</b>         | zg30           | <b>Solvent</b>              | CHLOROFORM-D         | <b>Points Count</b>          | 131072               |
| <b>Temperature (degree C)</b> | 27.000         |                             |                      | <b>Sweep Width (Hz)</b>      | 8012.82              |

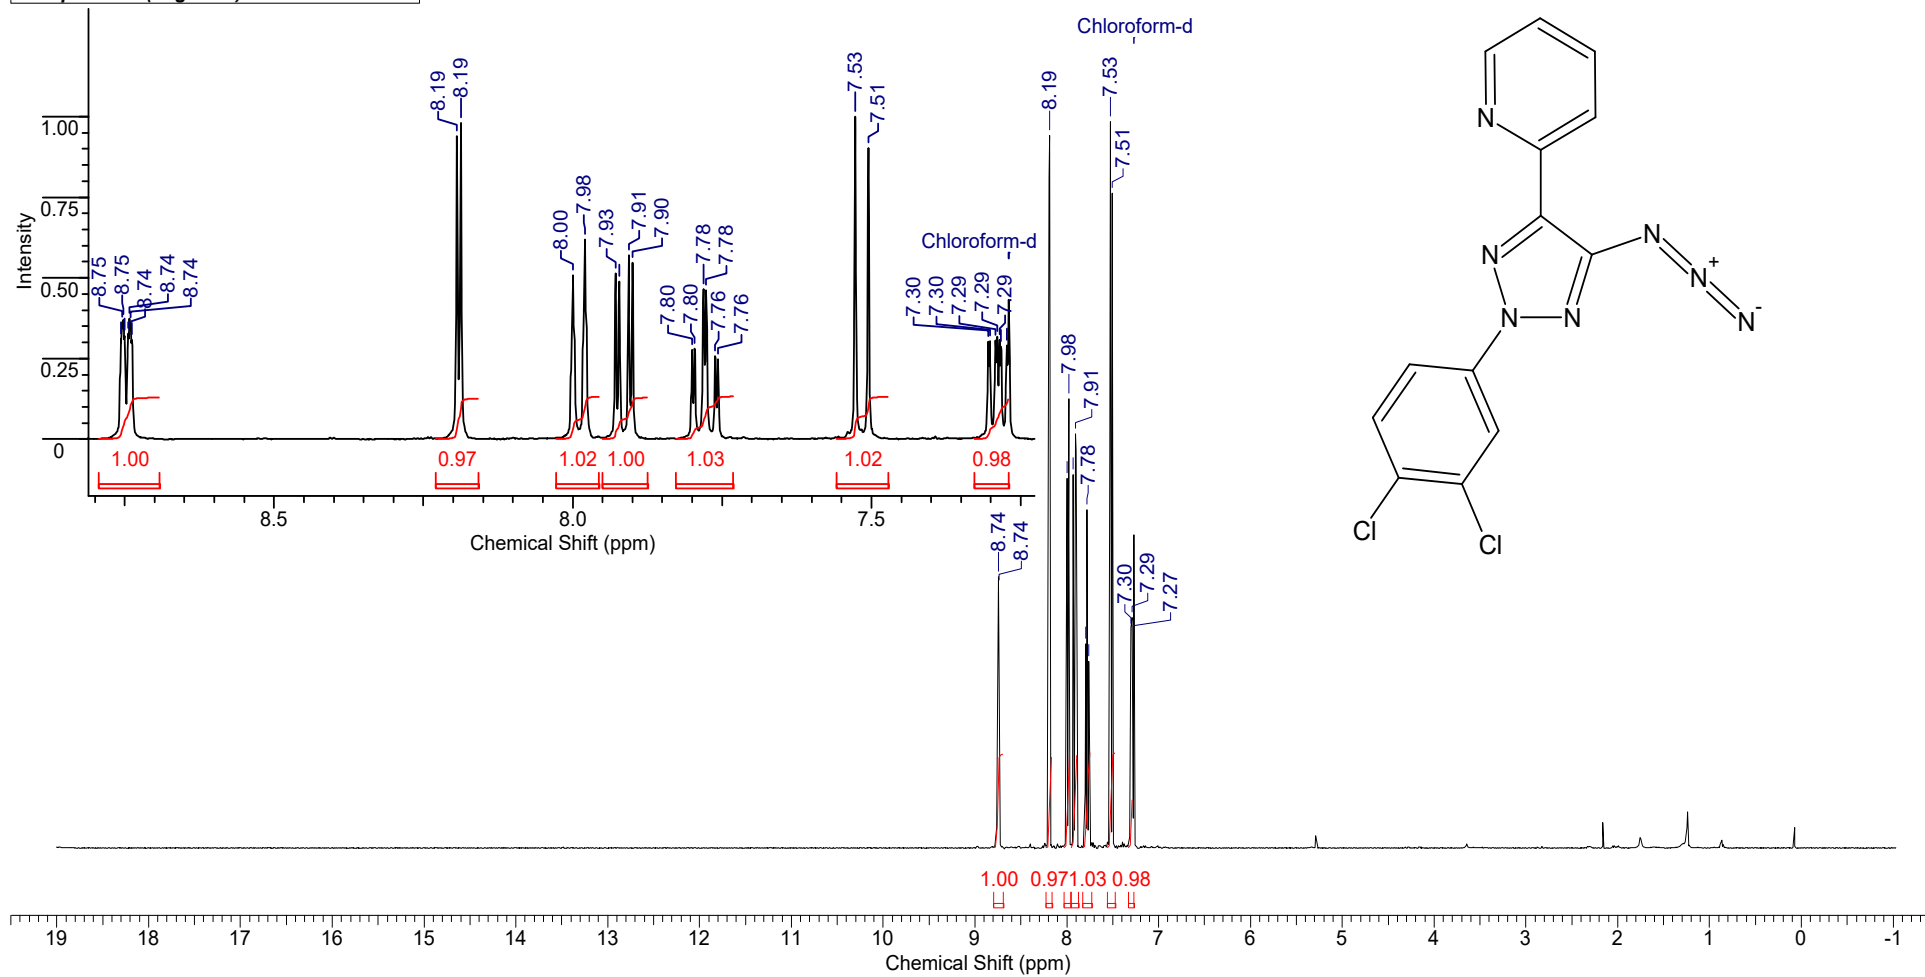

$^1\text{H}$  NMR spectrum of **2k** (400.1 MHz,  $\text{CDCl}_3$ )

|                               |        |                             |                      |                              |             |                               |        |
|-------------------------------|--------|-----------------------------|----------------------|------------------------------|-------------|-------------------------------|--------|
| <b>Acquisition Time (sec)</b> | 0.6783 | <b>Comment</b>              | Imported from UXNMR. |                              | <b>Date</b> | 12 Feb 2021 15:40:54          |        |
| <b>File Name</b>              |        | <b>Number of Transients</b> | 219                  | <b>Original Points Count</b> | 16384       | <b>Frequency (MHz)</b>        | 100.61 |
| <b>Nucleus</b>                | 13C    |                             |                      |                              |             | <b>Points Count</b>           | 131072 |
| <b>Pulse Sequence</b>         | zgpg30 | <b>Solvent</b>              | CHLOROFORM-D         | <b>Sweep Width (Hz)</b>      | 24154.59    | <b>Temperature (degree C)</b> | 27.000 |

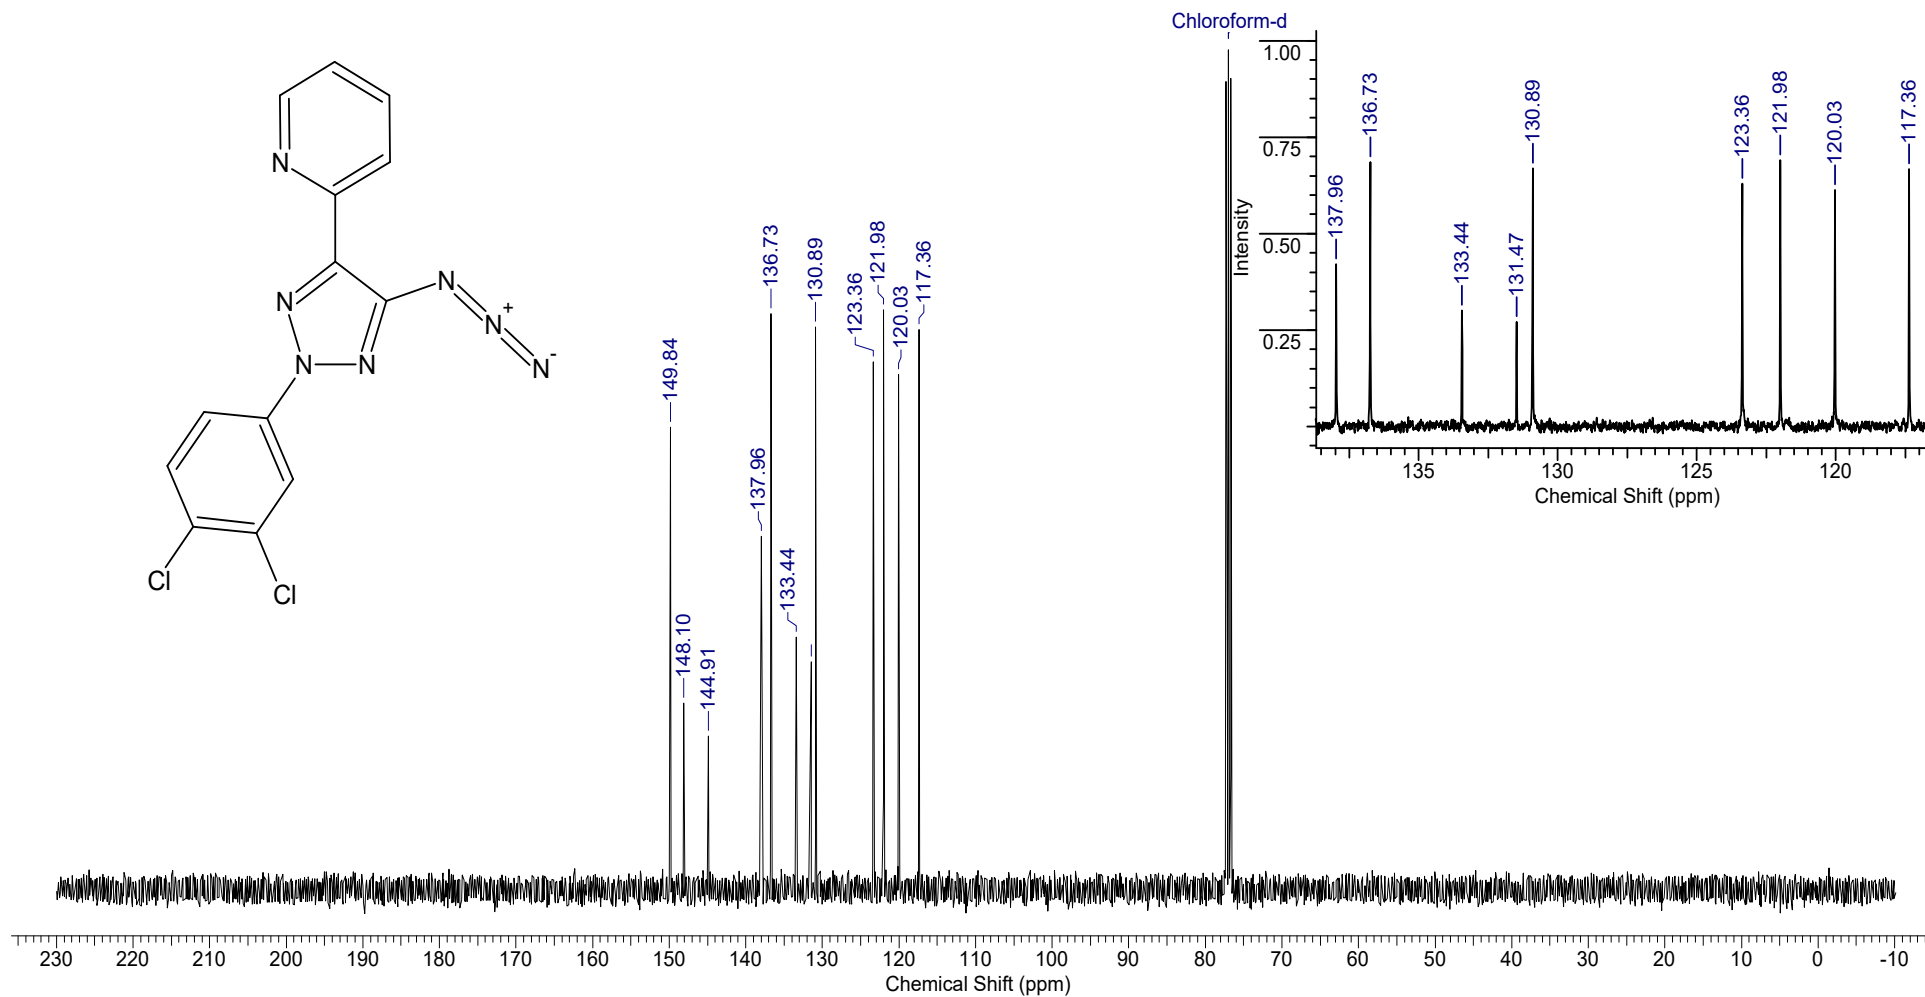

$^{13}\text{C}$  NMR spectrum of **2k** (100.6 MHz,  $\text{CDCl}_3$ )



|                               |        |                             |                      |                              |                      |
|-------------------------------|--------|-----------------------------|----------------------|------------------------------|----------------------|
| <b>Acquisition Time (sec)</b> | 4.0894 | <b>Comment</b>              | Imported from UXNMR. | <b>Date</b>                  | 26 Feb 2020 17:48:30 |
| <b>File Name</b>              |        |                             |                      | <b>Frequency (MHz)</b>       | 400.13               |
| <b>Nucleus</b>                | 1H     | <b>Number of Transients</b> | 4                    | <b>Original Points Count</b> | 32768                |
| <b>Pulse Sequence</b>         | zg30   | <b>Solvent</b>              | CHLOROFORM-D         | <b>Points Count</b>          | 131072               |
| <b>Temperature (degree C)</b> | 27.000 |                             |                      | <b>Sweep Width (Hz)</b>      | 8012.82              |

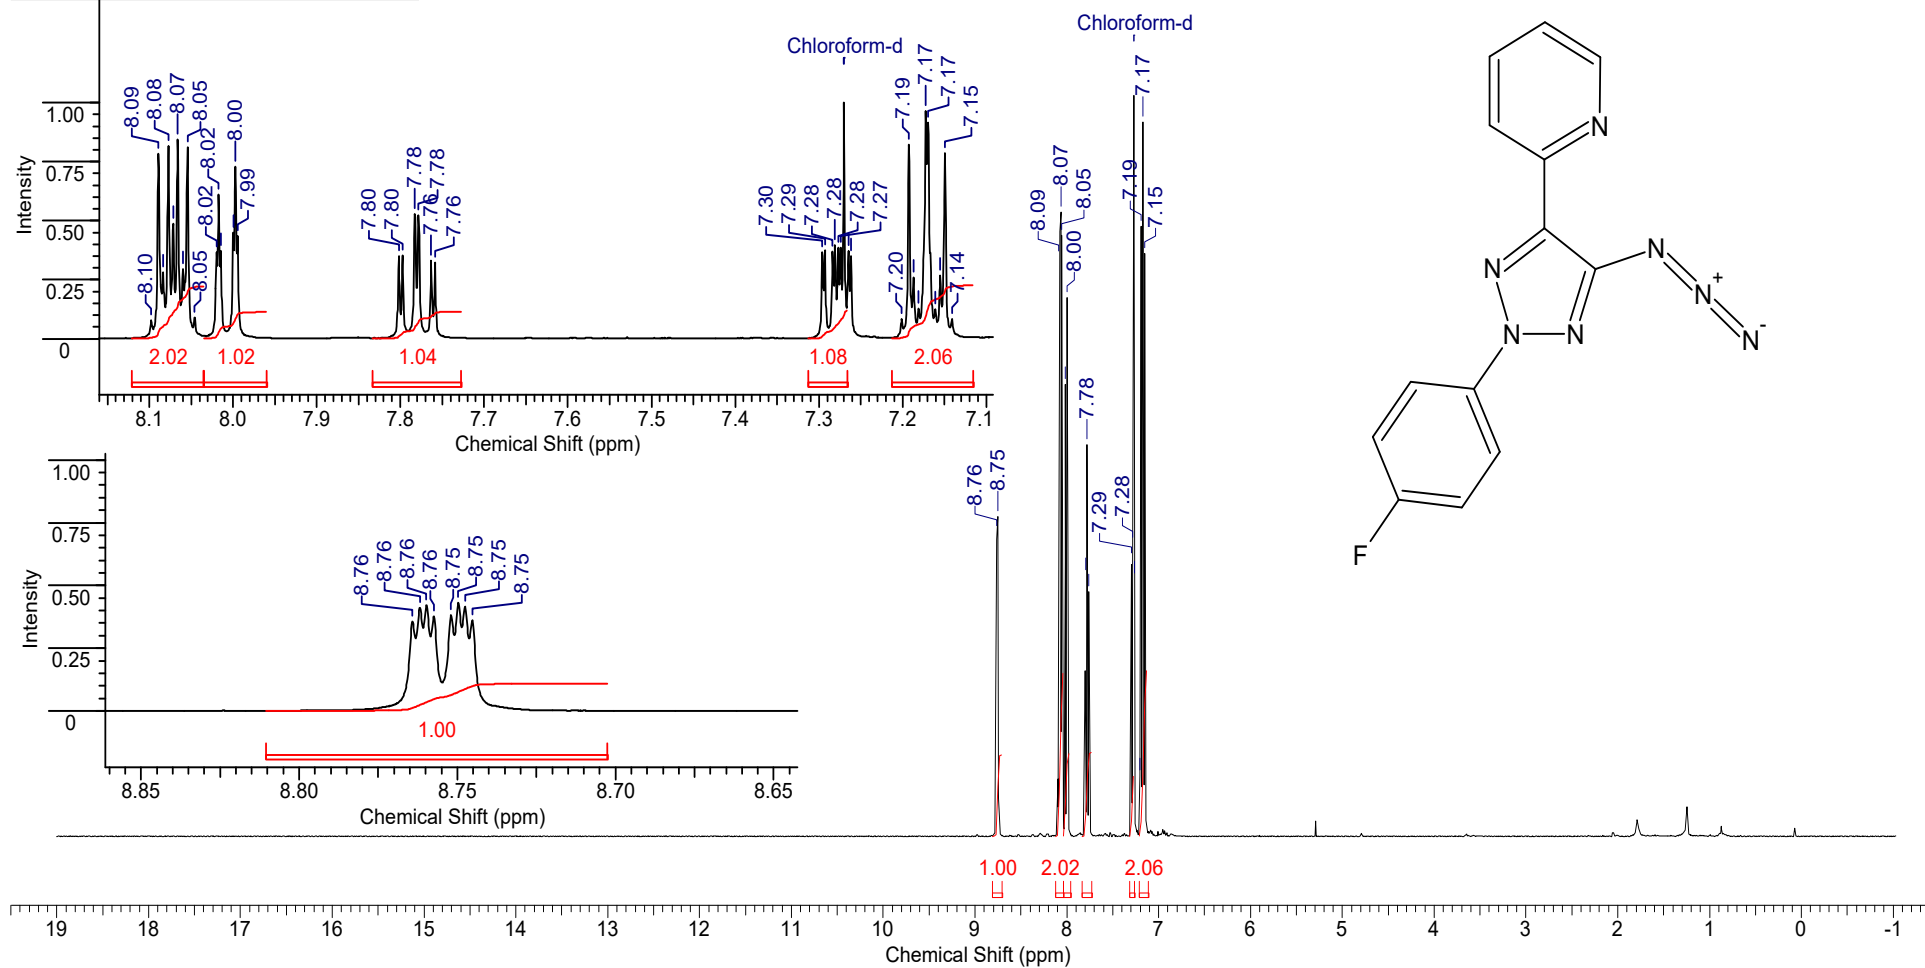

$^1\text{H}$  NMR spectrum of **2I** (400.1 MHz,  $\text{CDCl}_3$ )

|                               |                 |                             |                      |                              |             |                               |        |
|-------------------------------|-----------------|-----------------------------|----------------------|------------------------------|-------------|-------------------------------|--------|
| <b>Acquisition Time (sec)</b> | 0.6783          | <b>Comment</b>              | Imported from UXNMR. |                              | <b>Date</b> | 26 Feb 2020 17:53:24          |        |
| <b>File Name</b>              |                 | <b>Number of Transients</b> | 113                  | <b>Original Points Count</b> | 16384       | <b>Frequency (MHz)</b>        | 100.61 |
| <b>Nucleus</b>                | <sup>13</sup> C | <b>Solvent</b>              | CHLOROFORM-D         | <b>Sweep Width (Hz)</b>      | 24154.59    | <b>Points Count</b>           | 131072 |
| <b>Pulse Sequence</b>         | zgpg30          |                             |                      |                              |             | <b>Temperature (degree C)</b> | 27.000 |

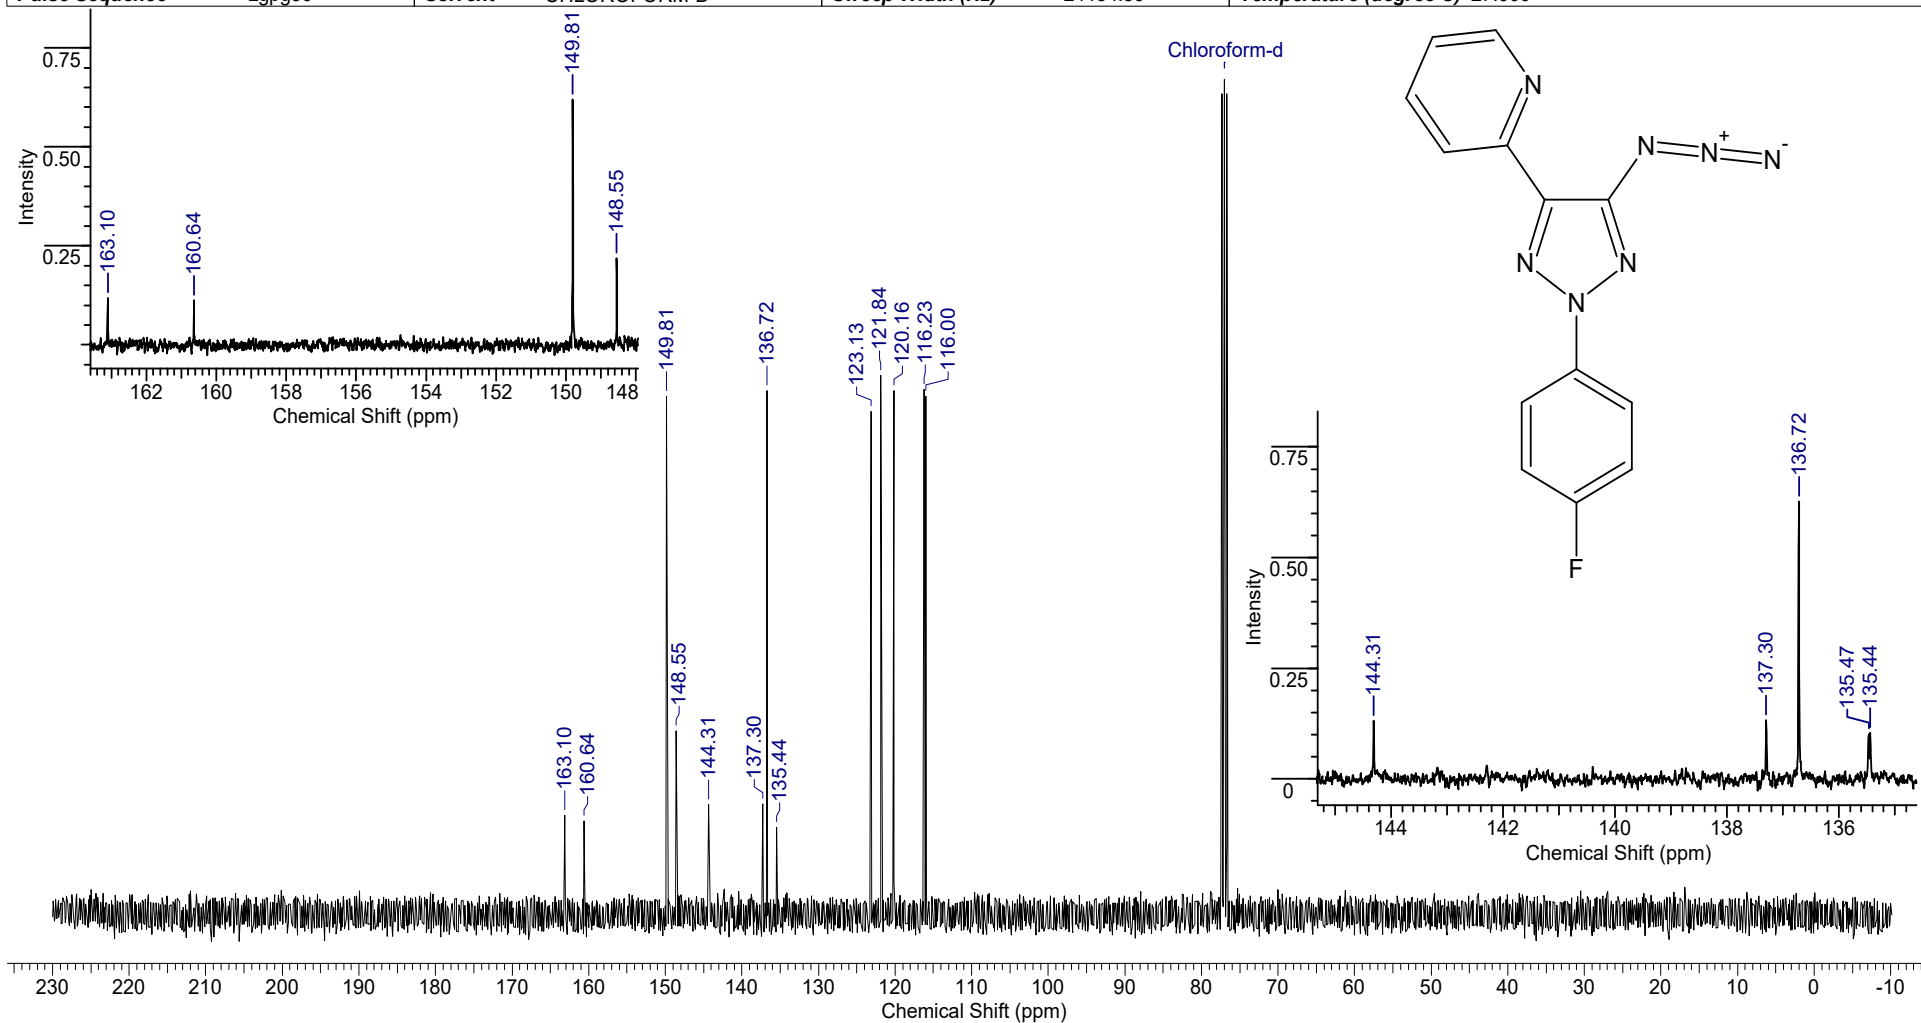

$^{13}\text{C}$  NMR spectrum of **21** (100.6 MHz,  $\text{CDCl}_3$ )

|                               |        |                             |              |                              |           |
|-------------------------------|--------|-----------------------------|--------------|------------------------------|-----------|
| <b>Acquisition Time (sec)</b> | 1.5729 | <b>Date</b>                 | Feb 27 2020  |                              |           |
| <b>File Name</b>              |        |                             |              | <b>Frequency (MHz)</b>       | 376.31    |
| <b>Nucleus</b>                | 19F    | <b>Number of Transients</b> | 8            | <b>Original Points Count</b> | 206956    |
| <b>Pulse Sequence</b>         | s2pul  | <b>Solvent</b>              | CHLOROFORM-D | <b>Points Count</b>          | 262144    |
| <b>Temperature (degree C)</b> | 23.000 |                             |              | <b>Sweep Width (Hz)</b>      | 131578.95 |

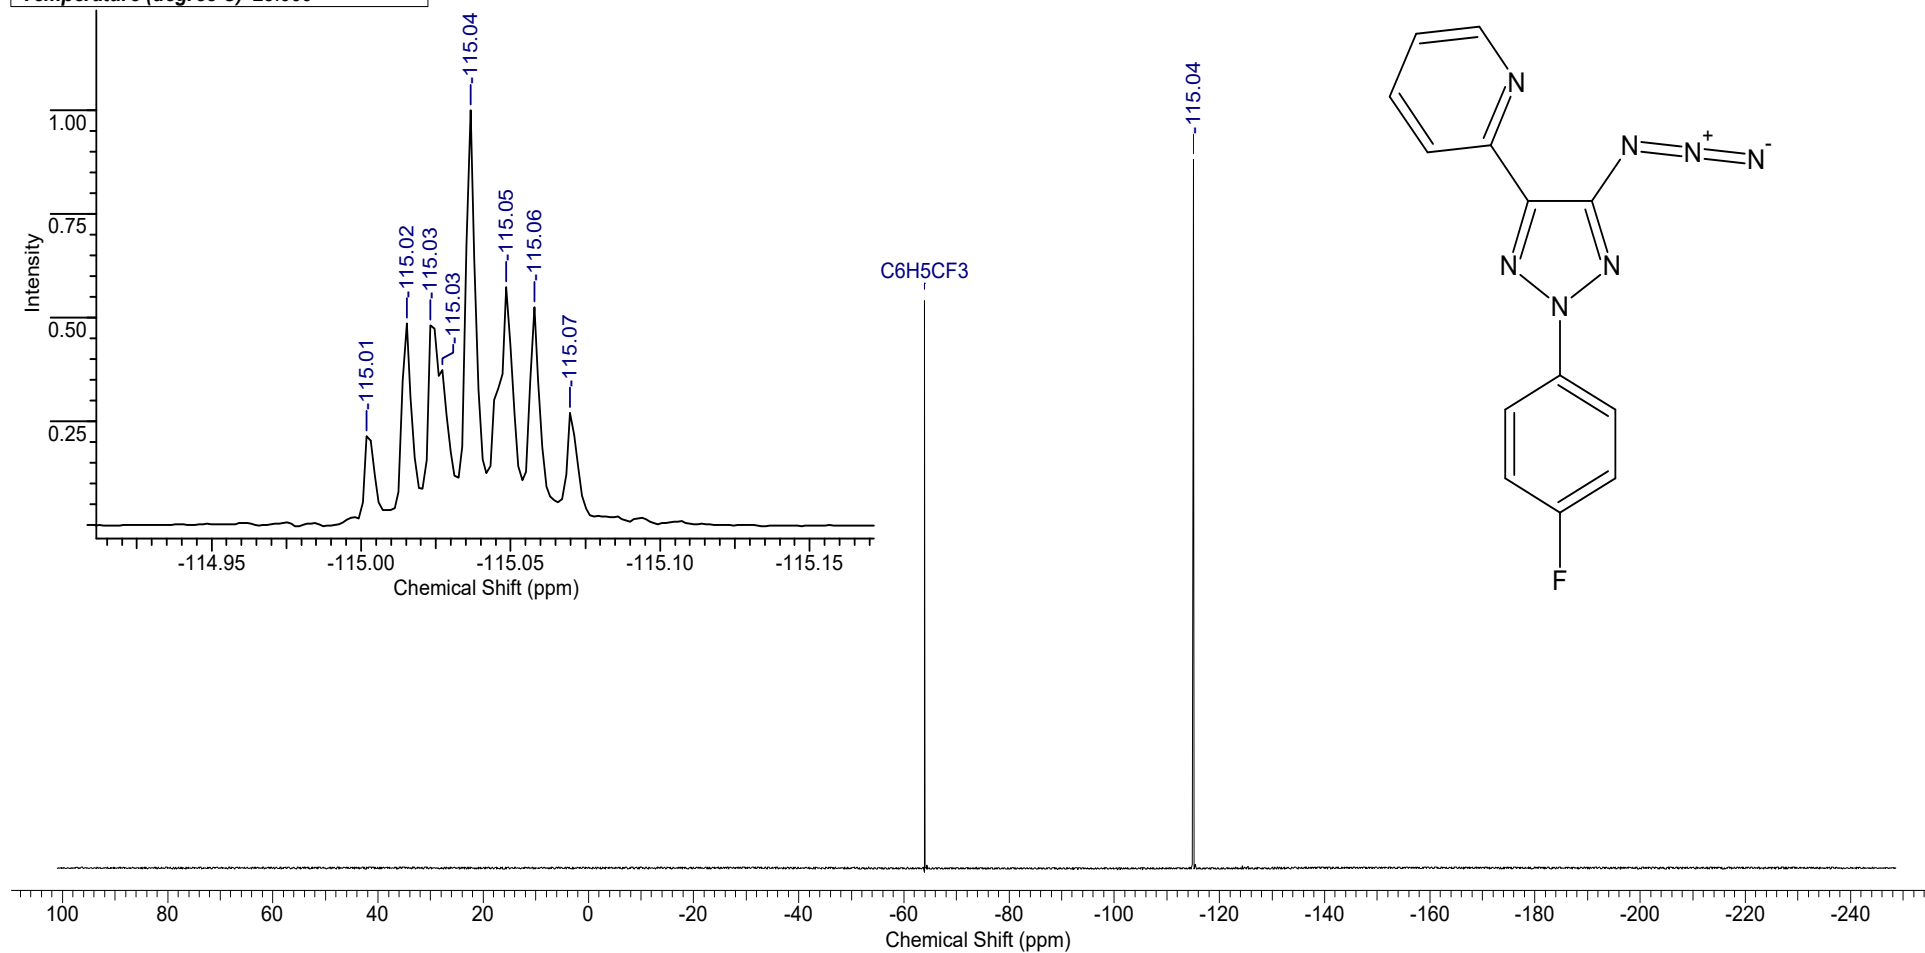

$^{19}\text{F}$  NMR spectrum of **21** (376.5 MHz,  $\text{CDCl}_3$ )

|                               |        |                             |                      |                              |                      |
|-------------------------------|--------|-----------------------------|----------------------|------------------------------|----------------------|
| <b>Acquisition Time (sec)</b> | 4.0894 | <b>Comment</b>              | Imported from UXNMR. | <b>Date</b>                  | 09 Feb 2021 14:23:36 |
| <b>File Name</b>              |        | <b>Number of Transients</b> | 4                    | <b>Original Points Count</b> | 32768                |
| <b>Nucleus</b>                | 1H     | <b>Solvent</b>              | CHLOROFORM-D         | <b>Frequency (MHz)</b>       | 400.13               |
| <b>Pulse Sequence</b>         | zg30   |                             |                      | <b>Points Count</b>          | 131072               |
| <b>Temperature (degree C)</b> | 27.000 |                             |                      | <b>Sweep Width (Hz)</b>      | 8012.82              |

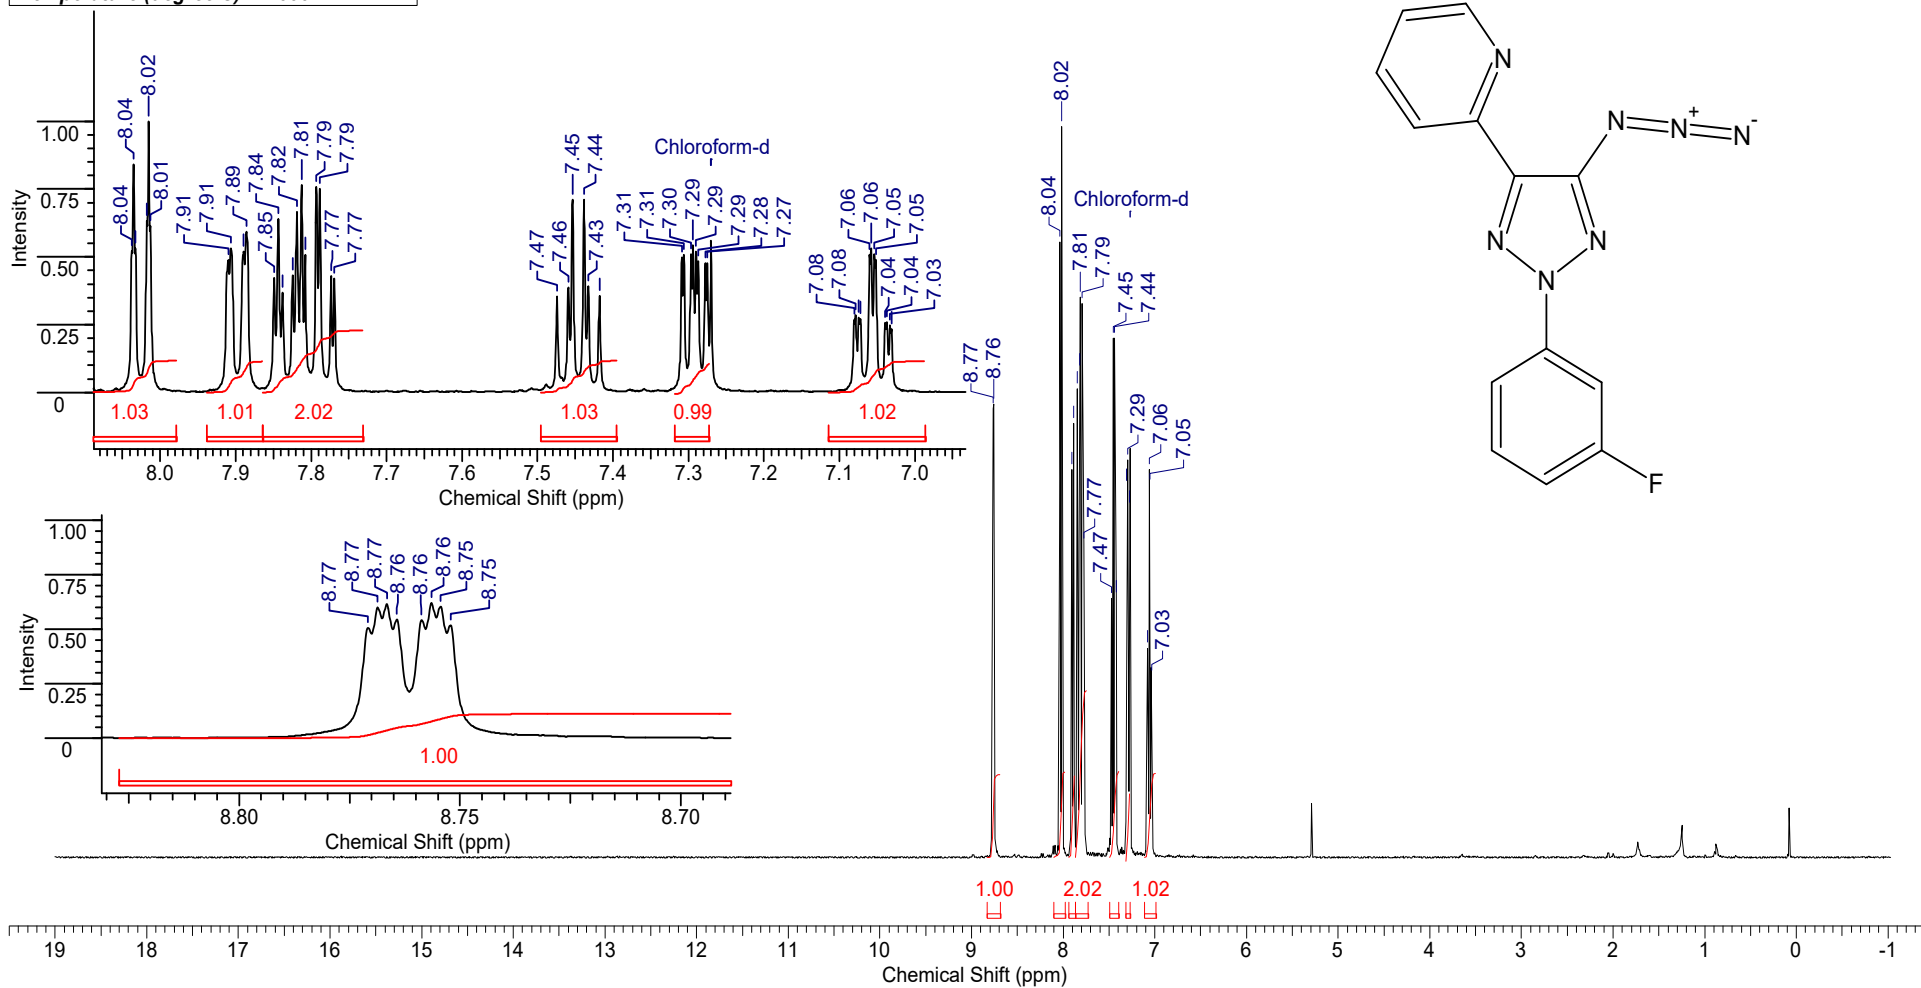

$^1\text{H}$  NMR spectrum of **2m** (400.1 MHz,  $\text{CDCl}_3$ )



|                               |                 |                             |                      |                              |                        |                               |        |
|-------------------------------|-----------------|-----------------------------|----------------------|------------------------------|------------------------|-------------------------------|--------|
| <b>Acquisition Time (sec)</b> | 0.6783          | <b>Comment</b>              | Imported from UXNMR. |                              | <b>Date</b>            | 09 Feb 2021 14:32:58          |        |
| <b>File Name</b>              |                 |                             |                      |                              | <b>Frequency (MHz)</b> | 100.61                        |        |
| <b>Nucleus</b>                | <sup>13</sup> C | <b>Number of Transients</b> | 201                  | <b>Original Points Count</b> | 16384                  | <b>Points Count</b>           | 131072 |
| <b>Pulse Sequence</b>         | zgpg30          | <b>Solvent</b>              | CHLOROFORM-D         | <b>Sweep Width (Hz)</b>      | 24154.59               | <b>Temperature (degree C)</b> | 27.000 |

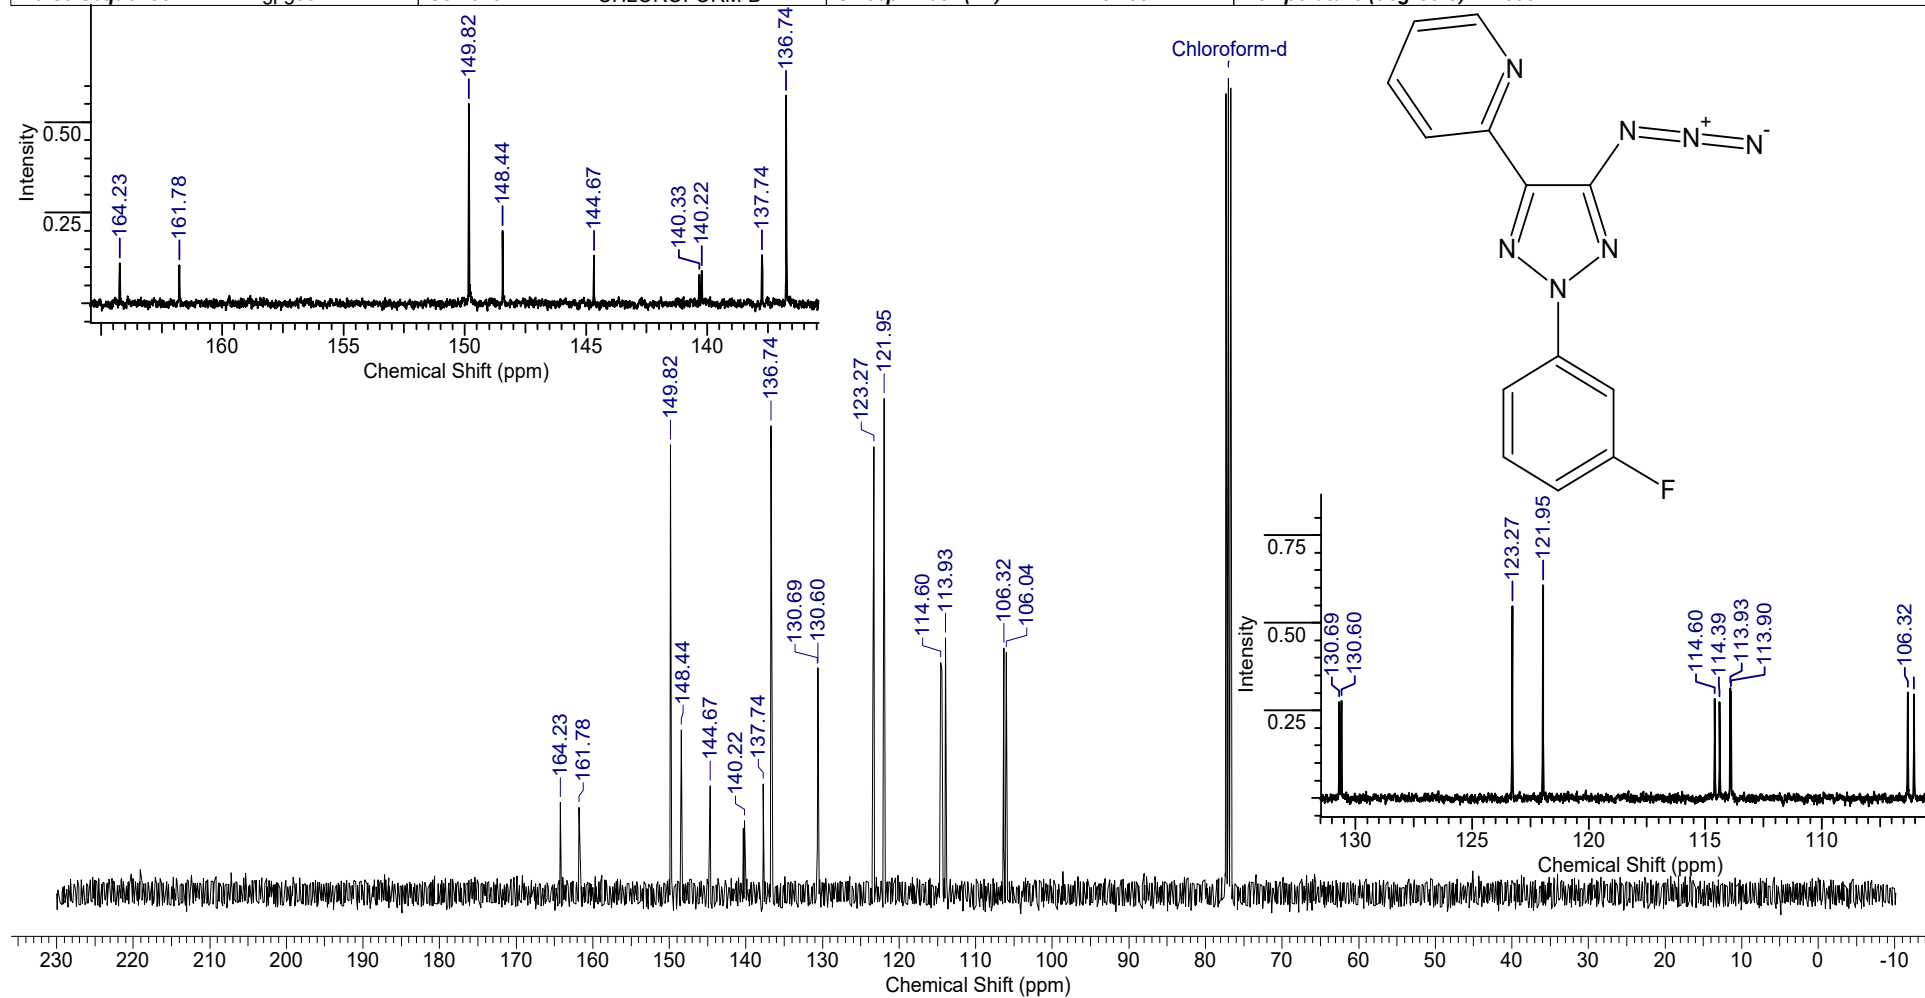

<sup>13</sup>C NMR spectrum of **2m** (100.6 MHz, CDCl<sub>3</sub>)

24 Mar 2021

|                        |        |                      |                      |                       |                      |
|------------------------|--------|----------------------|----------------------|-----------------------|----------------------|
| Acquisition Time (sec) | 1.7433 | Comment              | Imported from UXNMR. | Date                  | 08 Feb 2021 15:58:52 |
| File Name              |        |                      |                      | Frequency (MHz)       | 376.50               |
| Nucleus                | 19F    | Number of Transients | 16                   | Original Points Count | 131072               |
| Pulse Sequence         | zgflqn | Solvent              | CHLOROFORM-D         | Points Count          | 262144               |
| Temperature (degree C) | 27.000 |                      |                      | Sweep Width (Hz)      | 75187.97             |

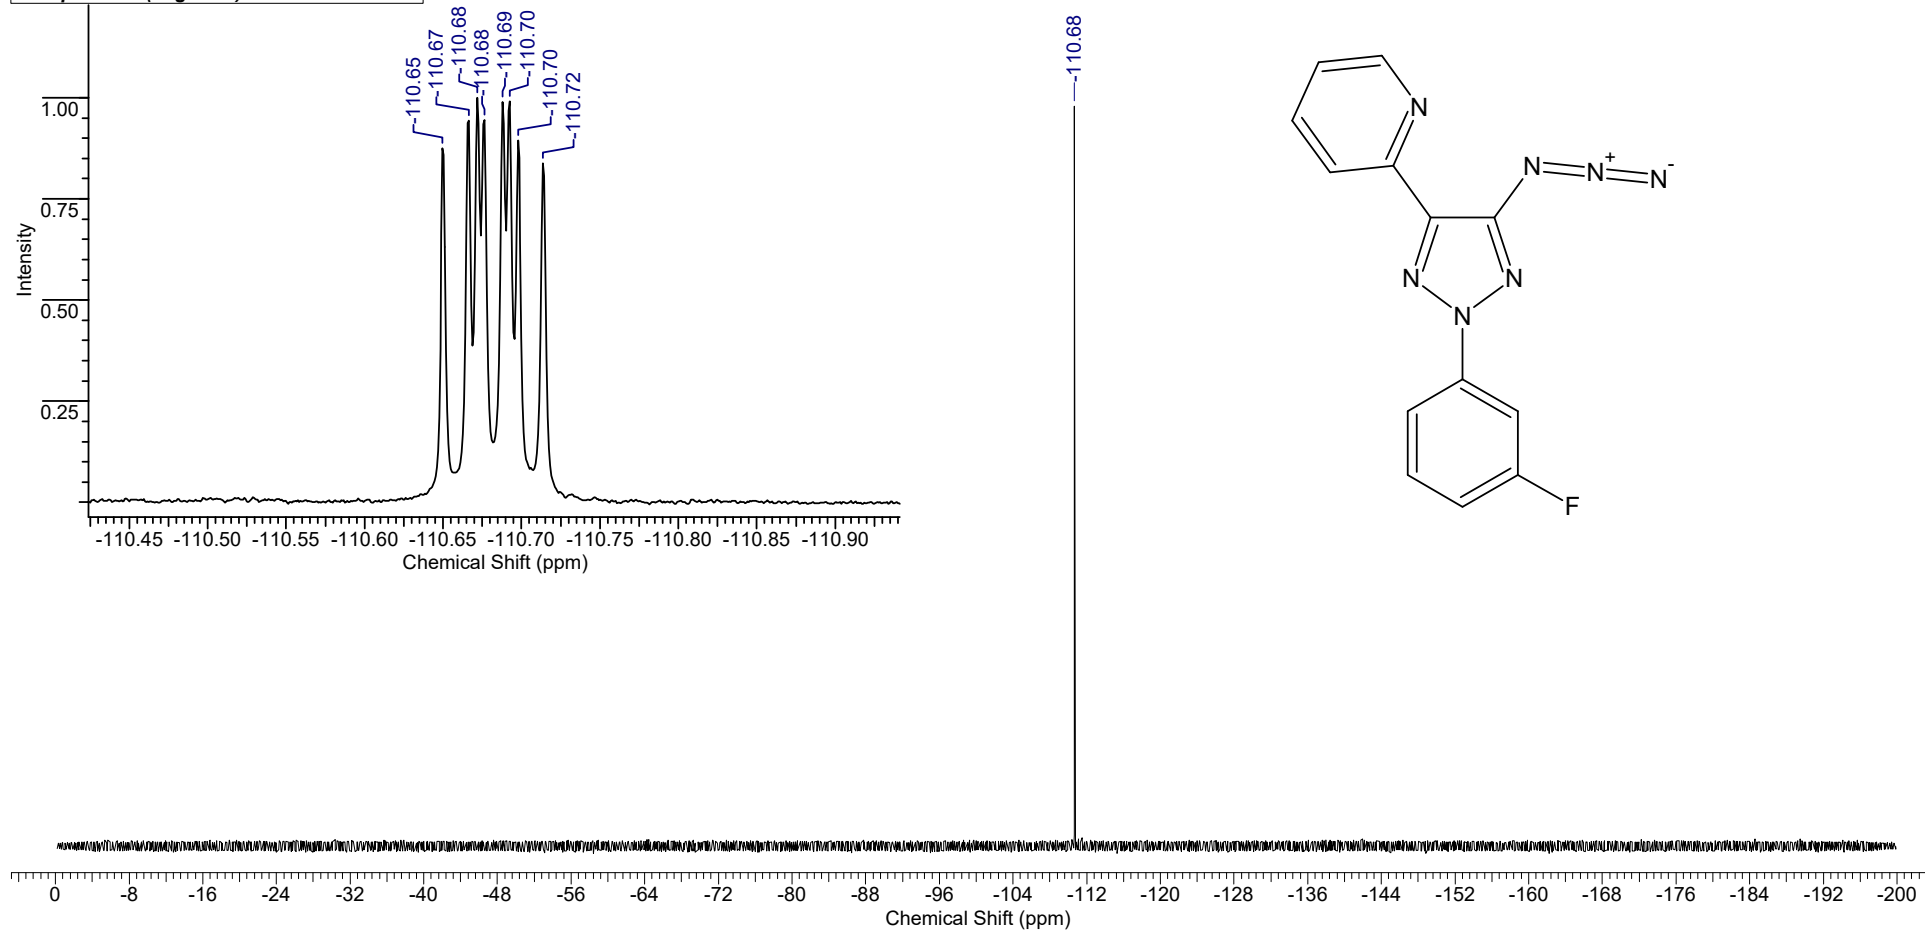

$^{19}\text{F}$  NMR spectrum of **2m** (376.5 MHz,  $\text{CDCl}_3$ )

|                               |        |                             |                      |                              |                         |                      |        |
|-------------------------------|--------|-----------------------------|----------------------|------------------------------|-------------------------|----------------------|--------|
| <b>Acquisition Time (sec)</b> | 4.0894 | <b>Comment</b>              | Imported from UXNMR. |                              | <b>Date</b>             | 06 Mar 2020 15:51:48 |        |
| <b>File Name</b>              |        |                             |                      |                              | <b>Frequency (MHz)</b>  | 400.13               |        |
| <b>Nucleus</b>                | 1H     | <b>Number of Transients</b> | 4                    | <b>Original Points Count</b> | 32768                   | <b>Points Count</b>  | 131072 |
| <b>Pulse Sequence</b>         | zg30   | <b>Solvent</b>              | CHLOROFORM-D         |                              | <b>Sweep Width (Hz)</b> | 8012.82              |        |
| <b>Temperature (degree C)</b> | 27.000 |                             |                      |                              |                         |                      |        |

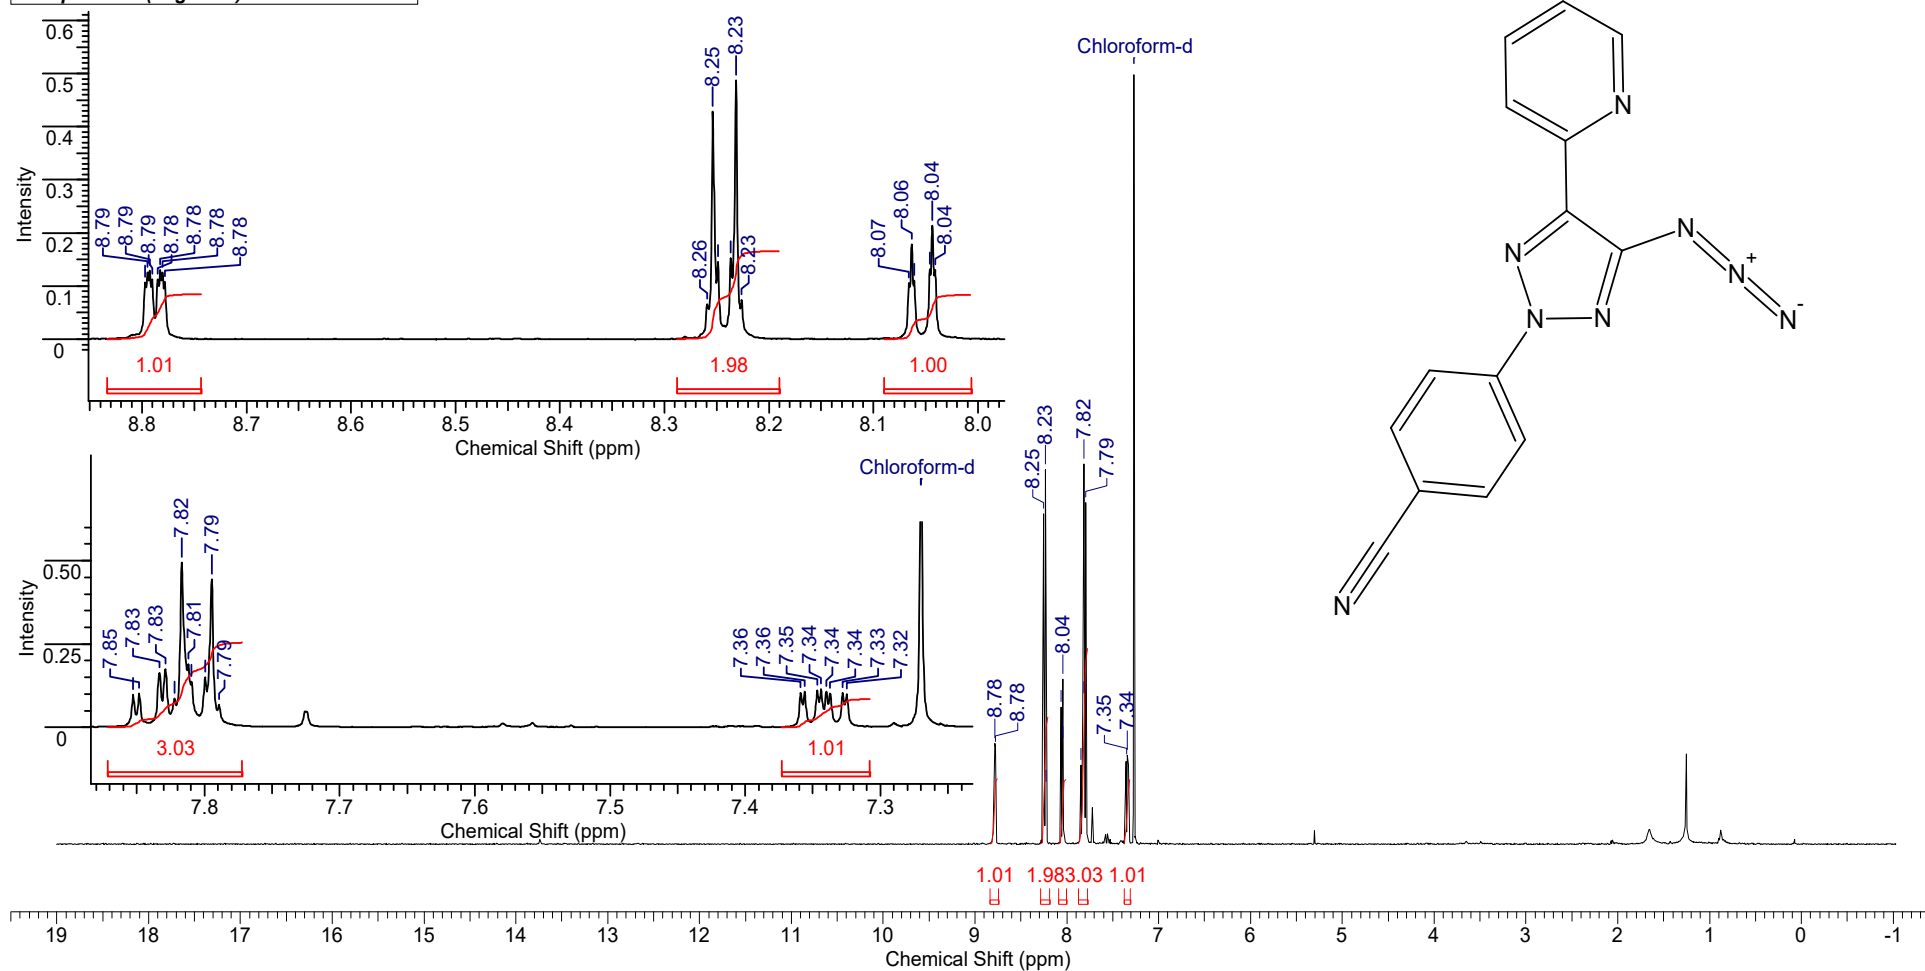

$^1\text{H}$  NMR spectrum of **2n** (400.1 MHz,  $\text{CDCl}_3$ )

|                               |                 |                             |                      |                              |                         |                      |        |
|-------------------------------|-----------------|-----------------------------|----------------------|------------------------------|-------------------------|----------------------|--------|
| <b>Acquisition Time (sec)</b> | 0.6783          | <b>Comment</b>              | Imported from UXNMR. |                              | <b>Date</b>             | 06 Mar 2020 17:02:52 |        |
| <b>File Name</b>              |                 |                             |                      |                              | <b>Frequency (MHz)</b>  | 100.61               |        |
| <b>Nucleus</b>                | <sup>13</sup> C | <b>Number of Transients</b> | 409                  | <b>Original Points Count</b> | 16384                   | <b>Points Count</b>  | 131072 |
| <b>Pulse Sequence</b>         | zgpg30          | <b>Solvent</b>              | CHLOROFORM-D         |                              | <b>Sweep Width (Hz)</b> | 24154.59             |        |
| <b>Temperature (degree C)</b> | 27.000          |                             |                      |                              |                         |                      |        |

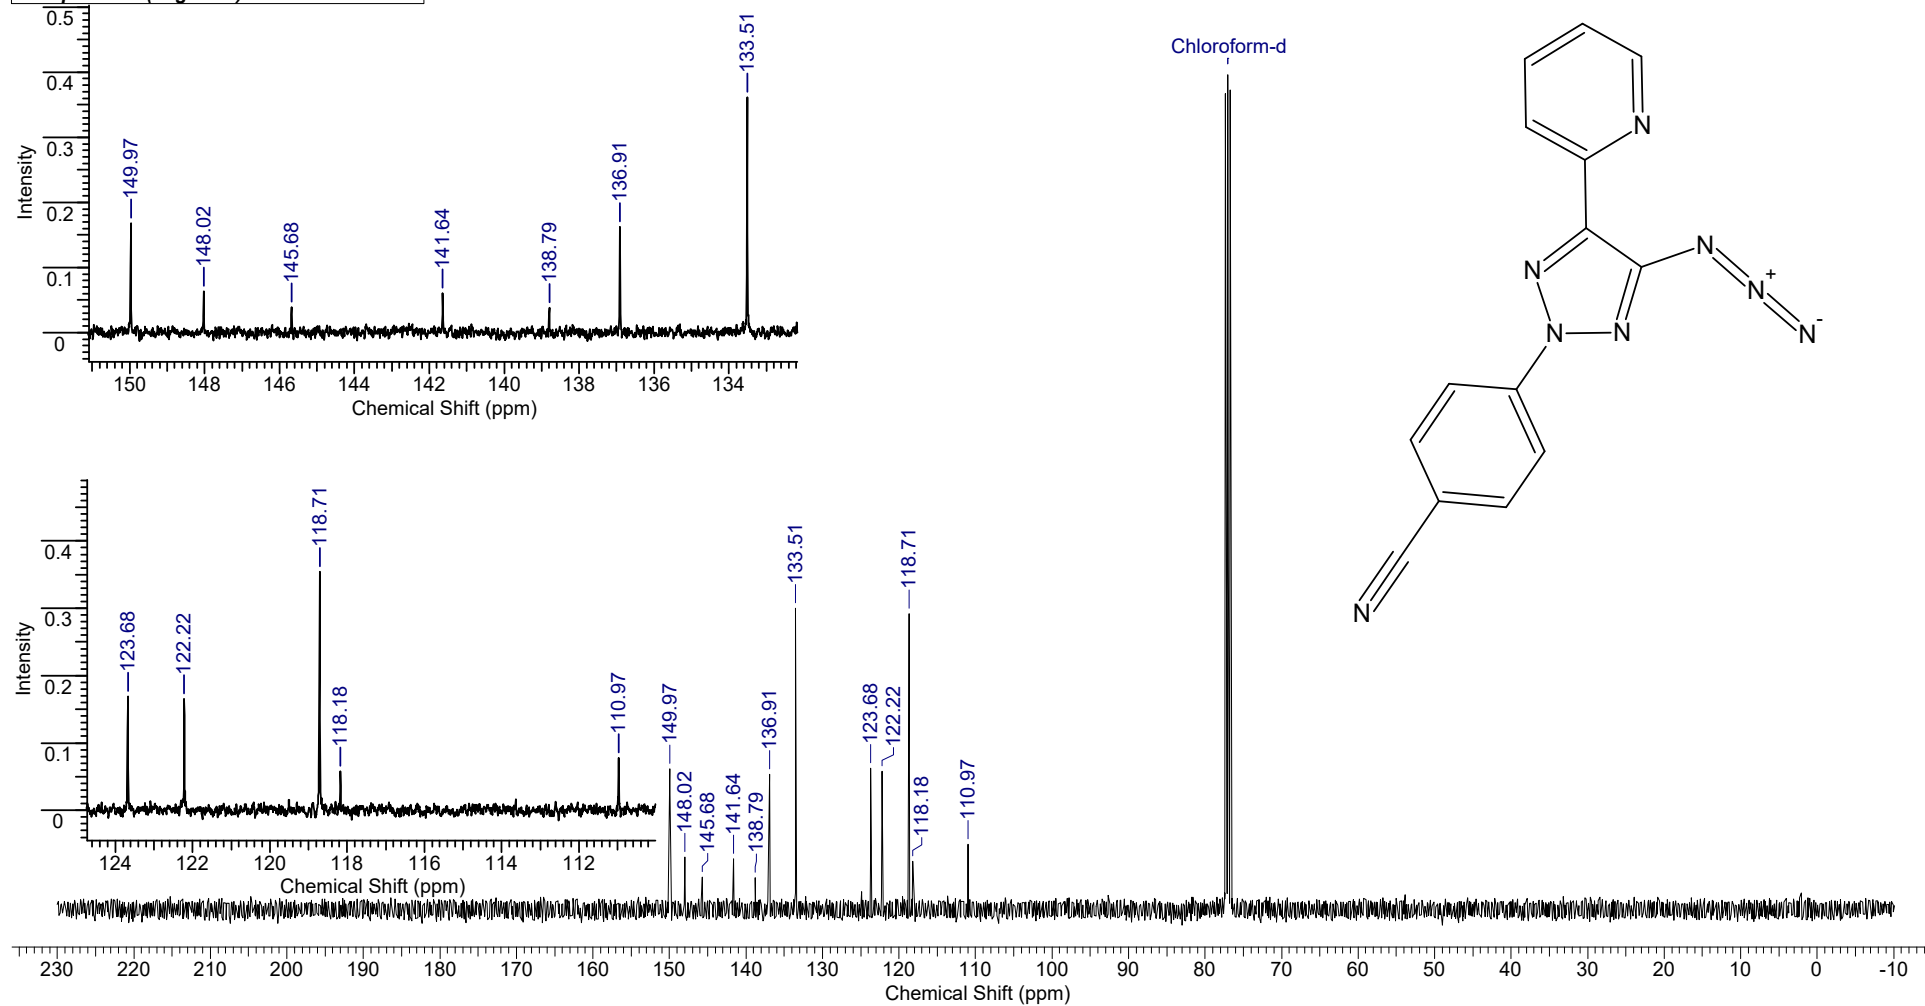

$^{13}\text{C}$  NMR spectrum of **2n** (100.6 MHz,  $\text{CDCl}_3$ )

|                               |        |                             |                      |                              |                      |
|-------------------------------|--------|-----------------------------|----------------------|------------------------------|----------------------|
| <b>Acquisition Time (sec)</b> | 4.0894 | <b>Comment</b>              | Imported from UXMNR. | <b>Date</b>                  | 02 Mar 2020 16:06:04 |
| <b>File Name</b>              |        | <b>Number of Transients</b> | 4                    | <b>Original Points Count</b> | 32768                |
| <b>Nucleus</b>                | 1H     | <b>Solvent</b>              | CHLOROFORM-D         | <b>Frequency (MHz)</b>       | 400.13               |
| <b>Pulse Sequence</b>         | zg30   |                             |                      | <b>Points Count</b>          | 131072               |
| <b>Temperature (degree C)</b> | 27.000 |                             |                      | <b>Sweep Width (Hz)</b>      | 8012.82              |

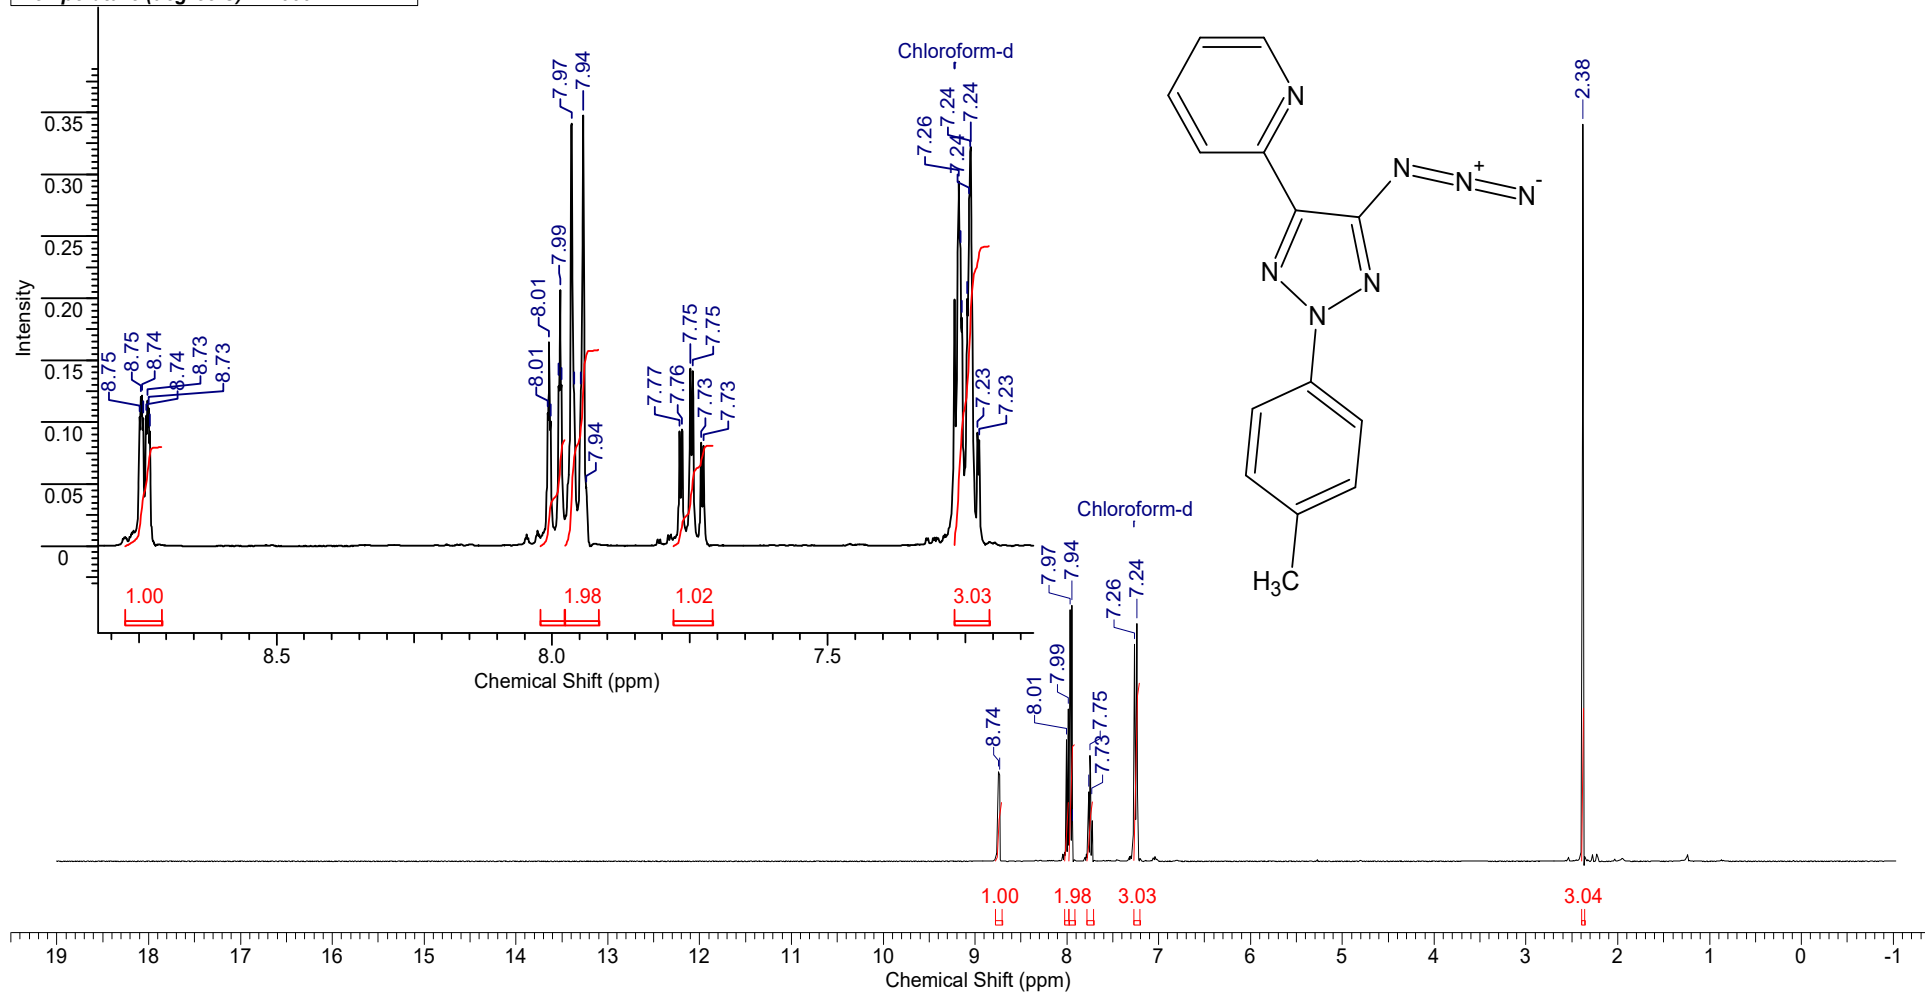



$^1\text{H}$  NMR spectrum of **2o** (400.1 MHz,  $\text{CDCl}_3$ )

|                               |                 |                             |                       |                              |             |                               |        |
|-------------------------------|-----------------|-----------------------------|-----------------------|------------------------------|-------------|-------------------------------|--------|
| <b>Acquisition Time (sec)</b> | 0.6783          | <b>Comment</b>              | Imported from UJXNMR. |                              | <b>Date</b> | 02 Mar 2020 16:07:32          |        |
| <b>File Name</b>              |                 | <b>Number of Transients</b> | 17                    | <b>Original Points Count</b> | 16384       | <b>Frequency (MHz)</b>        | 100.61 |
| <b>Nucleus</b>                | <sup>13</sup> C | <b>Solvent</b>              | CHLOROFORM-D          | <b>Sweep Width (Hz)</b>      | 24154.59    | <b>Points Count</b>           | 131072 |
| <b>Pulse Sequence</b>         | zgpg30          |                             |                       |                              |             | <b>Temperature (degree C)</b> | 27.000 |

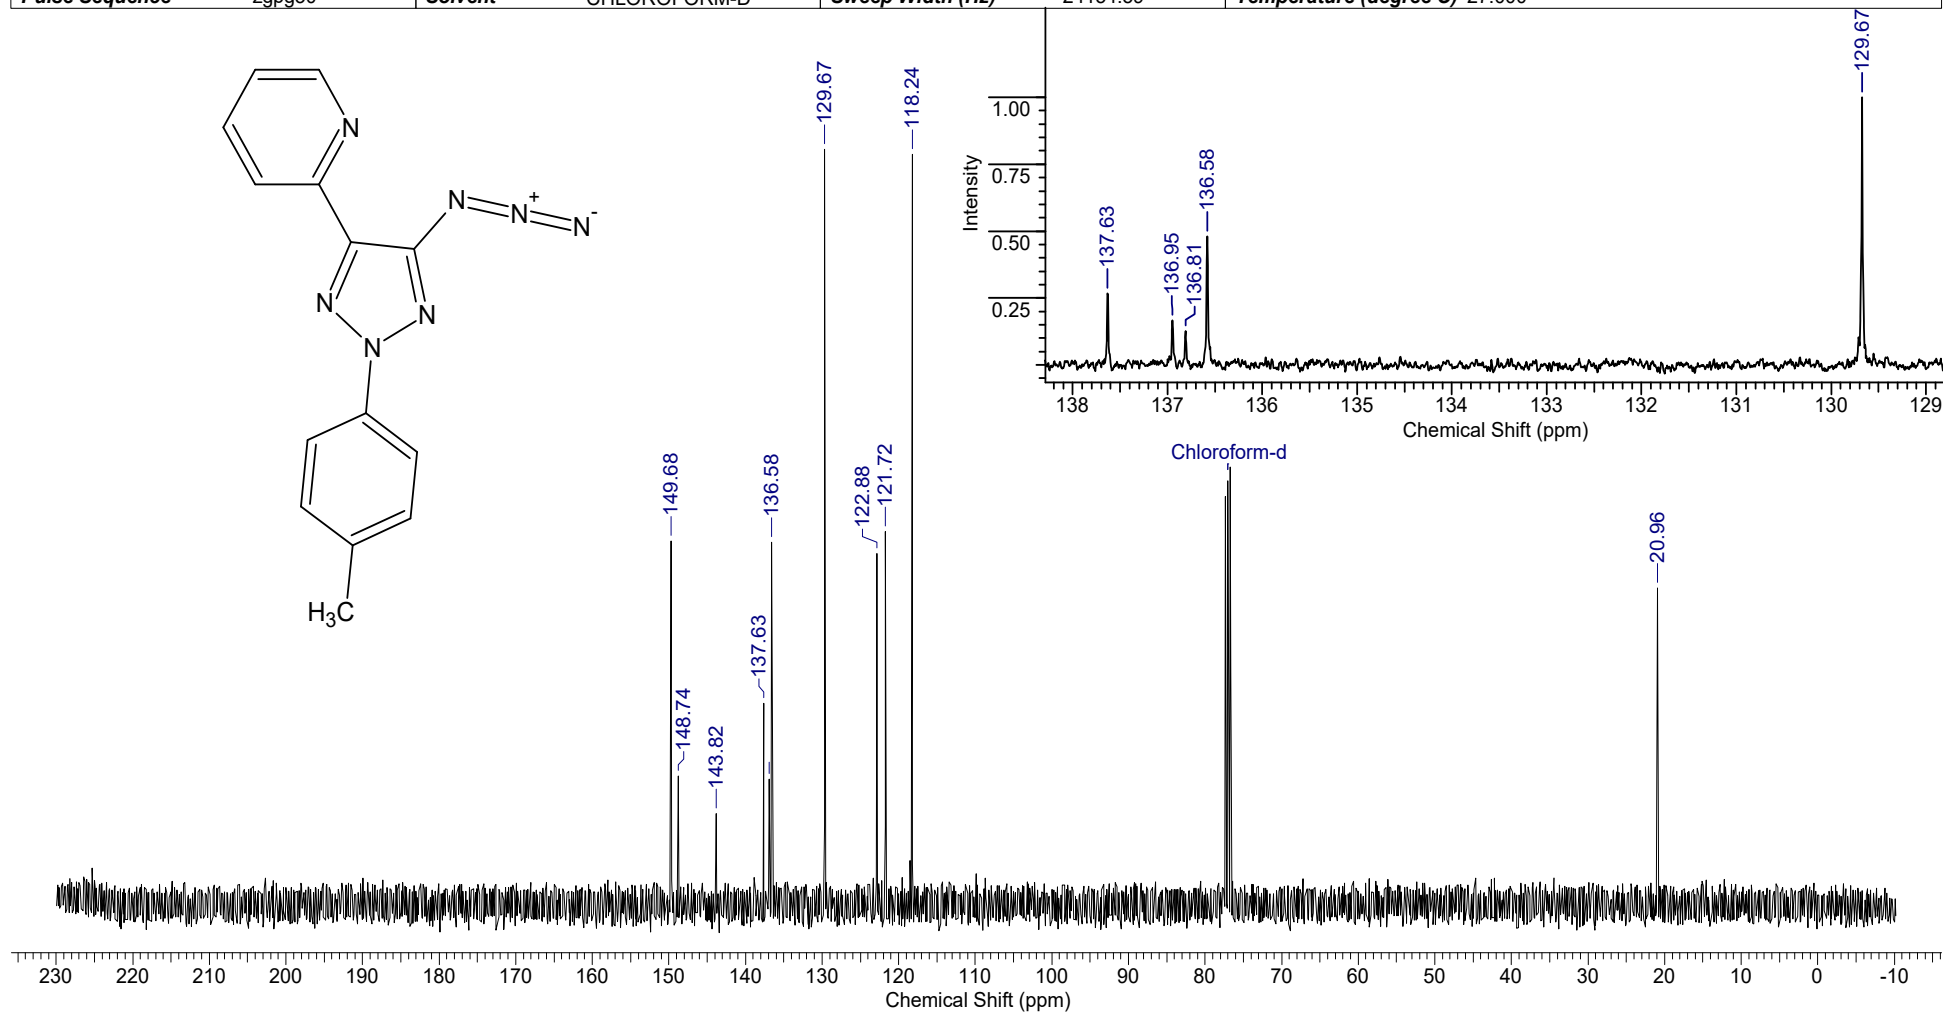

$^{13}\text{C}$  NMR spectrum of **2o** (100.6 MHz,  $\text{CDCl}_3$ )

|                               |                |                              |                      |                         |                      |
|-------------------------------|----------------|------------------------------|----------------------|-------------------------|----------------------|
| <b>Acquisition Time (sec)</b> | 4.0894         | <b>Comment</b>               | Imported from UXNMR. | <b>Date</b>             | 25 Dec 2020 15:09:46 |
| <b>File Name</b>              |                | <b>Number of Transients</b>  | 4                    | <b>Frequency (MHz)</b>  | 400.13               |
| <b>Nucleus</b>                | <sup>1</sup> H | <b>Original Points Count</b> | 32768                | <b>Points Count</b>     | 131072               |
| <b>Pulse Sequence</b>         | zg30           | <b>Solvent</b>               | CHLOROFORM-D         | <b>Sweep Width (Hz)</b> | 8012.82              |
| <b>Temperature (degree C)</b> | 27.000         |                              |                      |                         |                      |

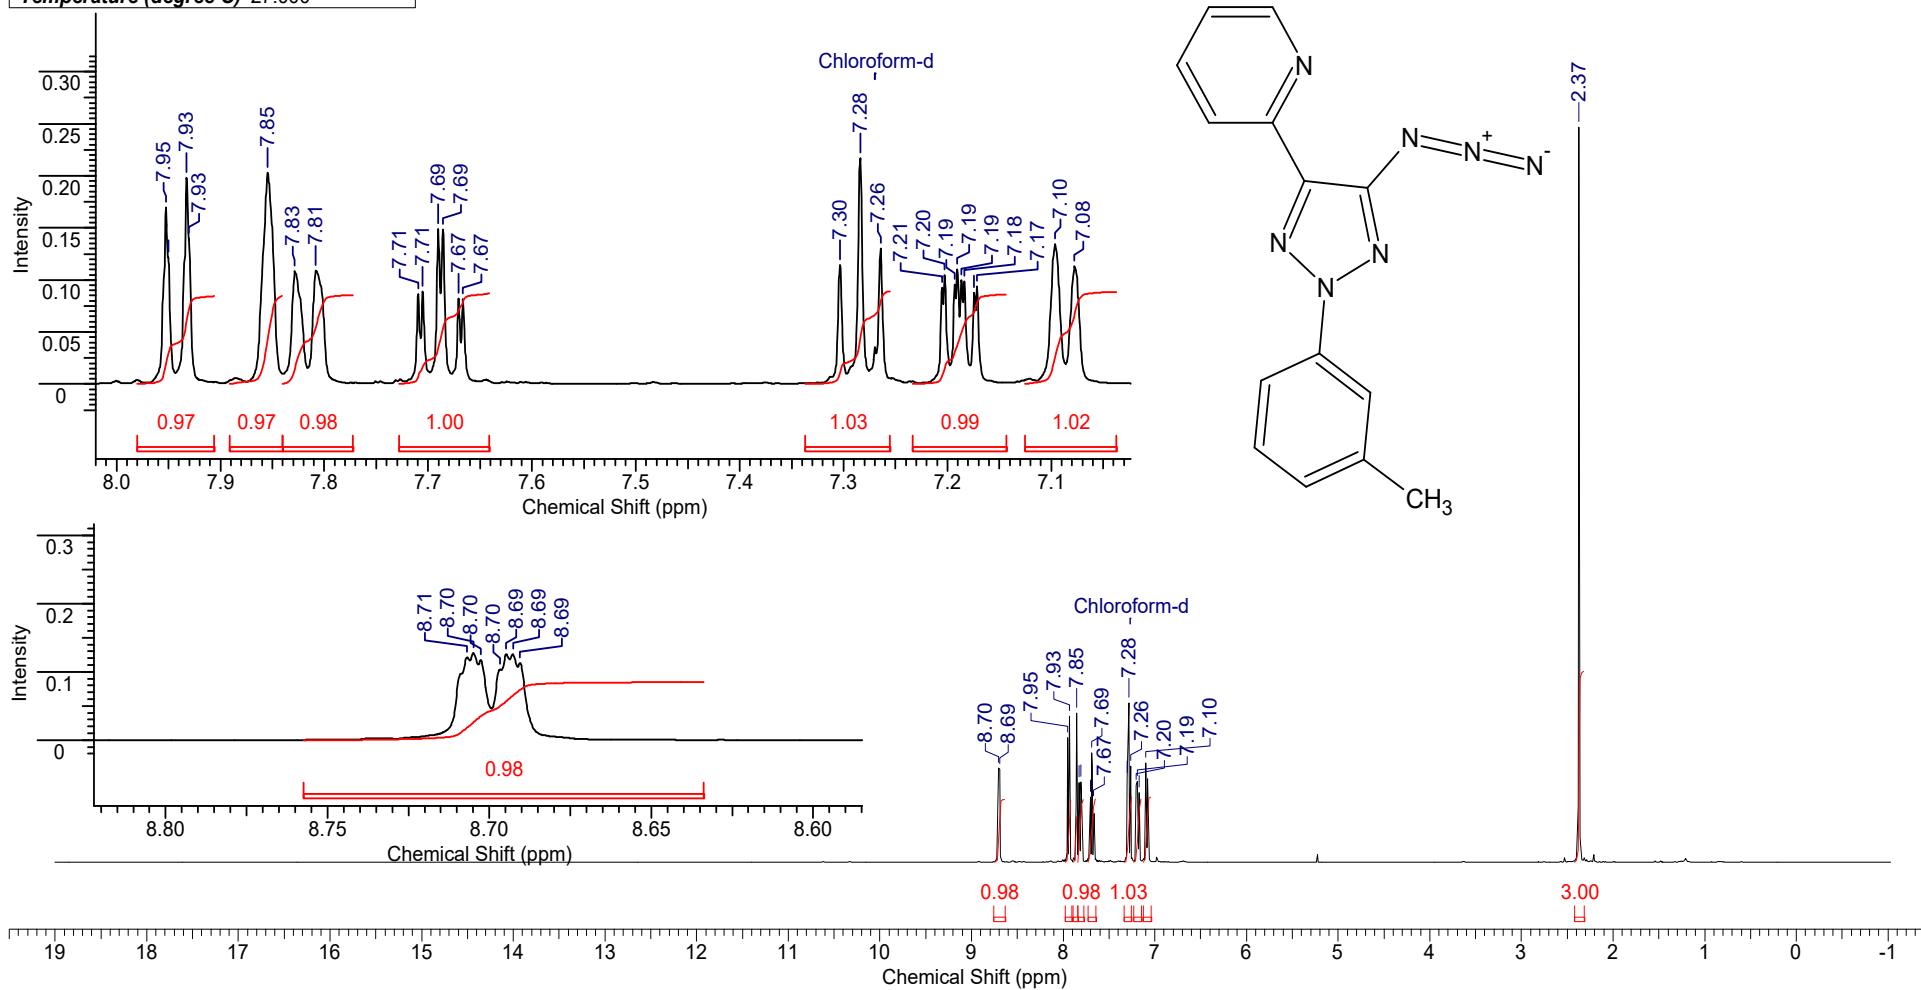

$^1\text{H}$  NMR spectrum of **2p** (400.1 MHz,  $\text{CDCl}_3$ )

|                               |                 |                             |                      |                              |                        |                               |        |
|-------------------------------|-----------------|-----------------------------|----------------------|------------------------------|------------------------|-------------------------------|--------|
| <b>Acquisition Time (sec)</b> | 0.6783          | <b>Comment</b>              | Imported from UXMNR. |                              | <b>Date</b>            | 25 Dec 2020 15:14:12          |        |
| <b>File Name</b>              |                 |                             |                      |                              | <b>Frequency (MHz)</b> | 100.61                        |        |
| <b>Nucleus</b>                | <sup>13</sup> C | <b>Number of Transients</b> | 70                   | <b>Original Points Count</b> | 16384                  | <b>Points Count</b>           | 131072 |
| <b>Pulse Sequence</b>         | zgpg30          | <b>Solvent</b>              | CHLOROFORM-D         | <b>Sweep Width (Hz)</b>      | 24154.59               | <b>Temperature (degree C)</b> | 27.000 |

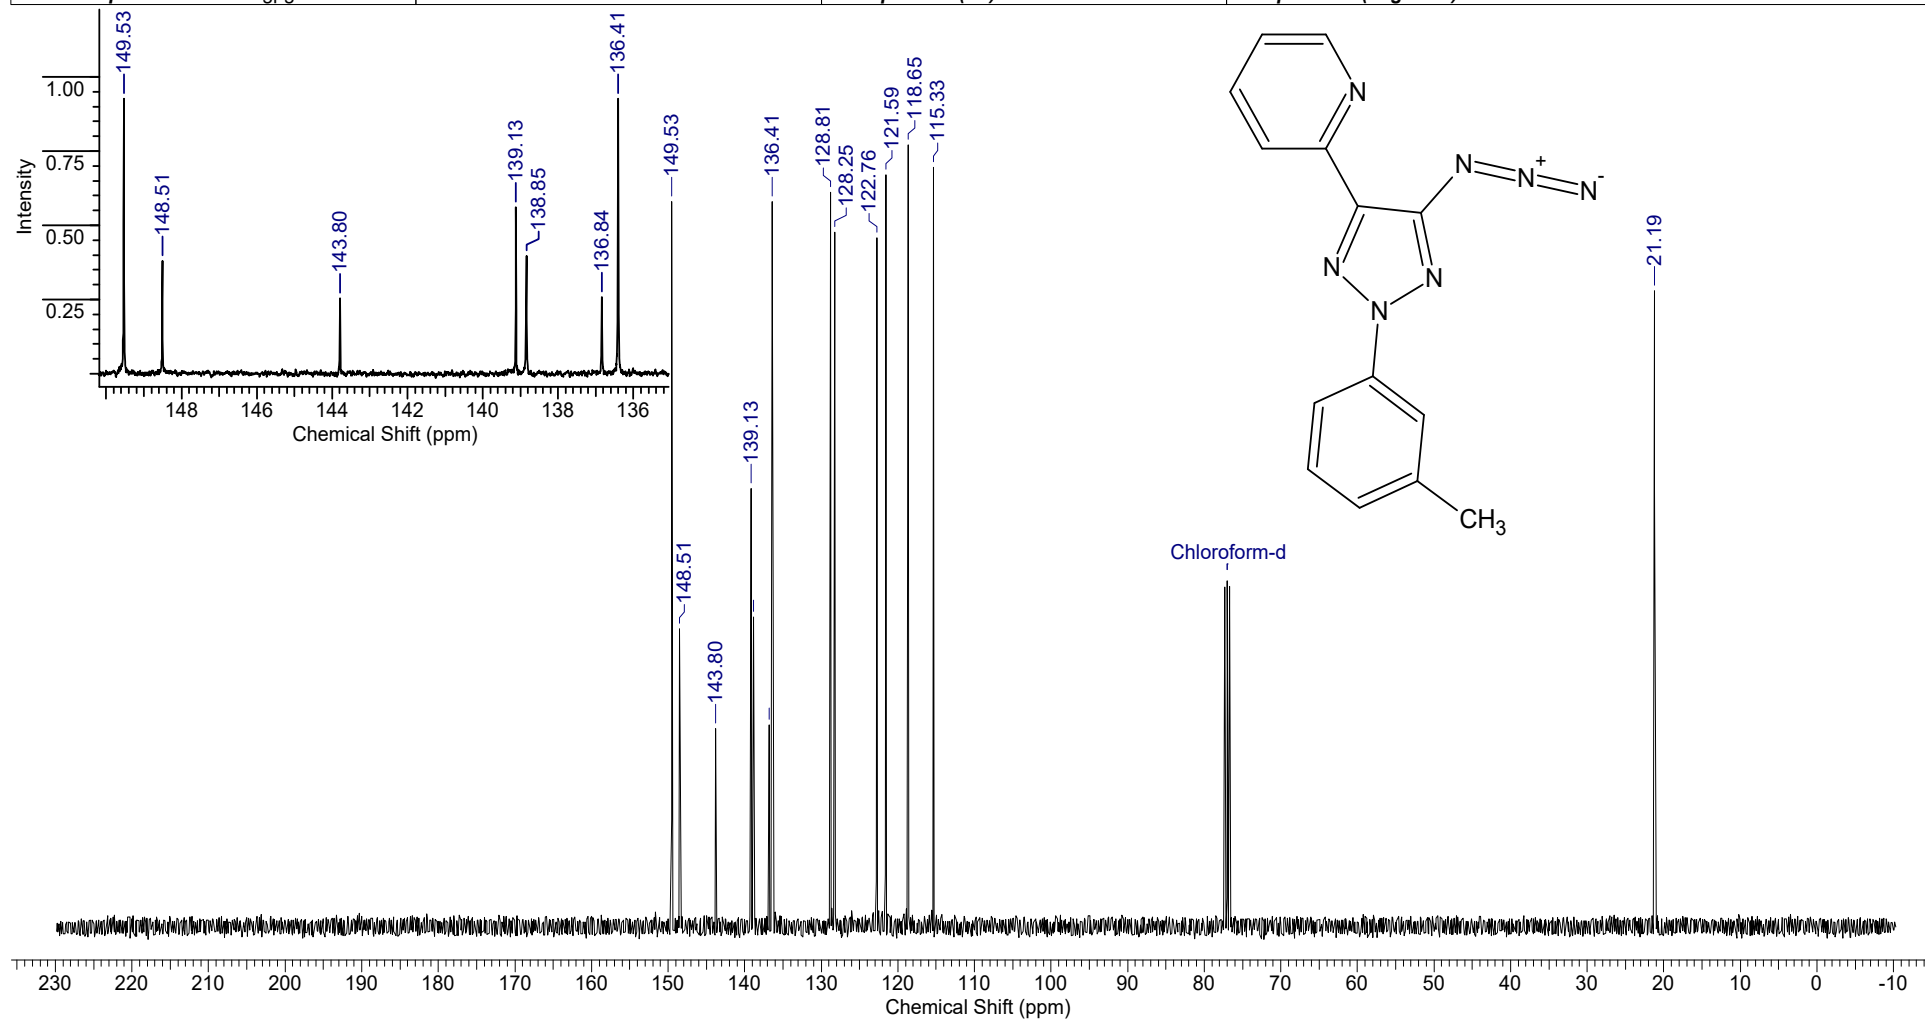

$^{13}\text{C}$  NMR spectrum of **2p** (100.6 MHz,  $\text{CDCl}_3$ )

|                               |        |                             |                      |                              |                         |                      |        |
|-------------------------------|--------|-----------------------------|----------------------|------------------------------|-------------------------|----------------------|--------|
| <b>Acquisition Time (sec)</b> | 4.0894 | <b>Comment</b>              | Imported from UXNMR. |                              | <b>Date</b>             | 03 Jul 2020 15:22:40 |        |
| <b>File Name</b>              |        |                             |                      |                              | <b>Frequency (MHz)</b>  | 400.13               |        |
| <b>Nucleus</b>                | 1H     | <b>Number of Transients</b> | 4                    | <b>Original Points Count</b> | 32768                   | <b>Points Count</b>  | 131072 |
| <b>Pulse Sequence</b>         | zg30   | <b>Solvent</b>              | CHLOROFORM-D         |                              | <b>Sweep Width (Hz)</b> | 8012.82              |        |
| <b>Temperature (degree C)</b> | 27.000 |                             |                      |                              |                         |                      |        |

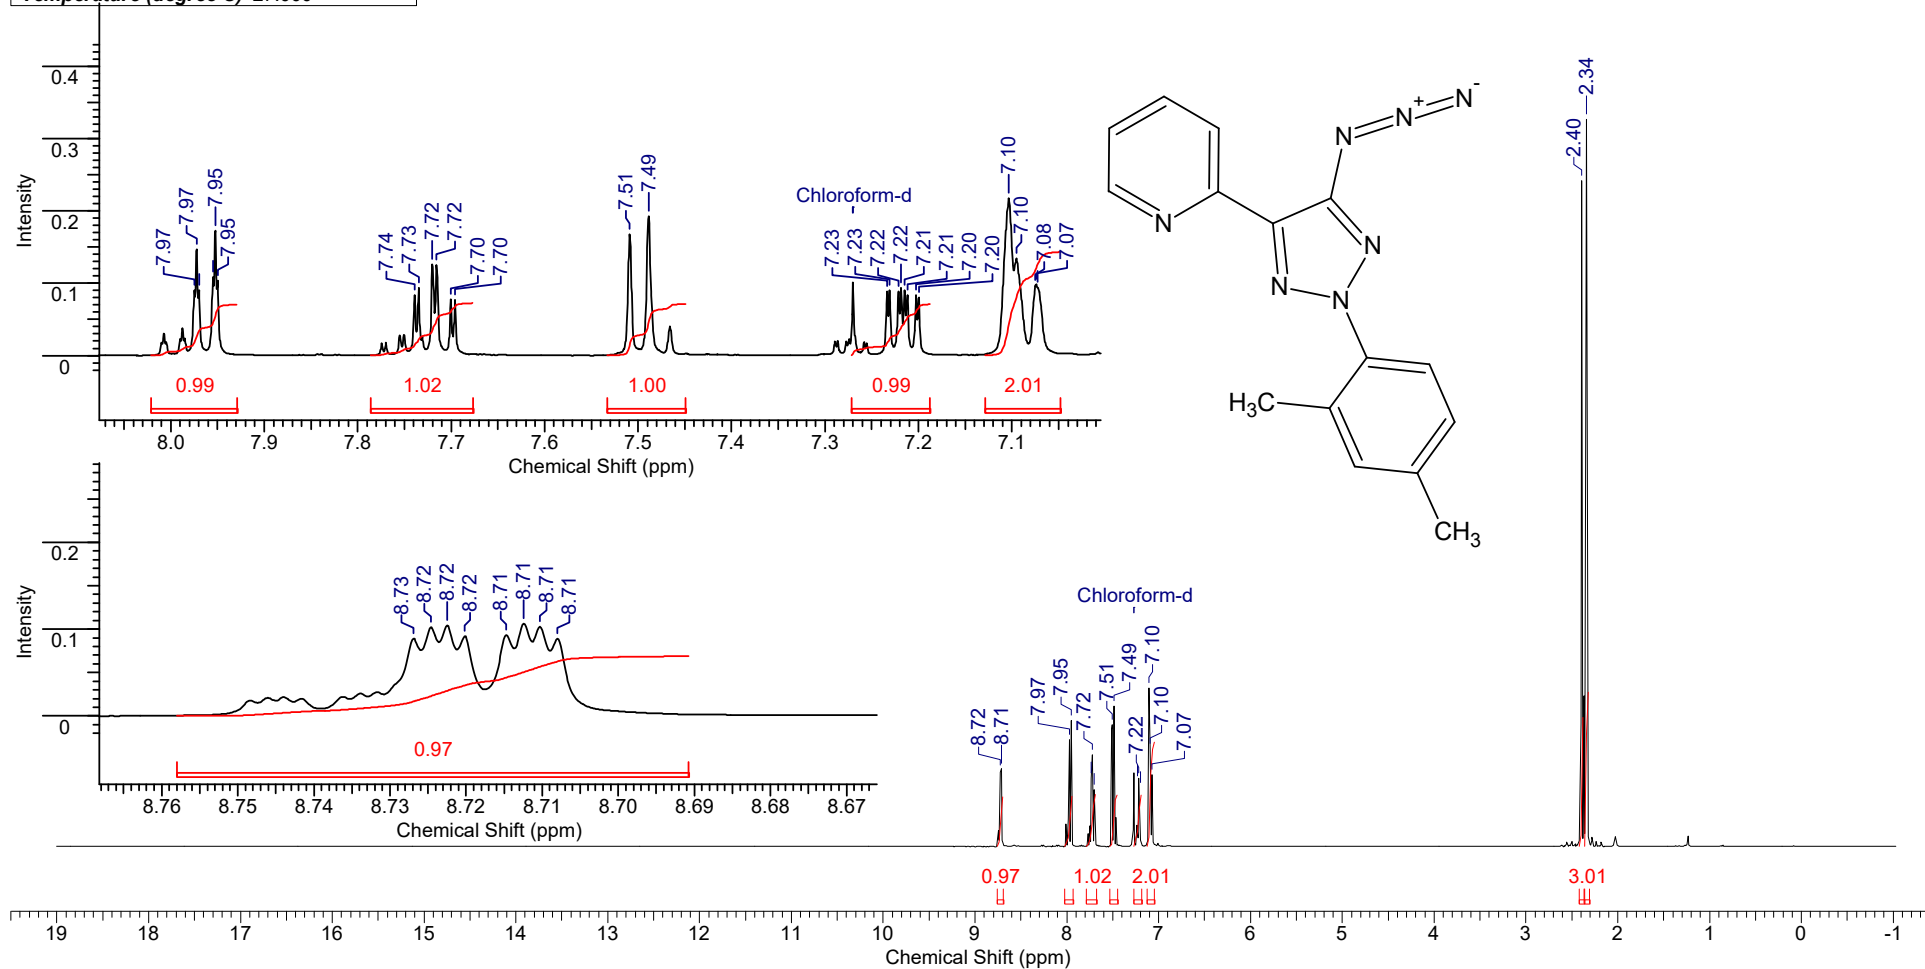



$^1\text{H}$  NMR spectrum of **2q** (400.1 MHz,  $\text{CDCl}_3$ )

|                               |        |                             |                      |                              |                         |                      |        |
|-------------------------------|--------|-----------------------------|----------------------|------------------------------|-------------------------|----------------------|--------|
| <b>Acquisition Time (sec)</b> | 0.6783 | <b>Comment</b>              | Imported from UXNMR. |                              | <b>Date</b>             | 03 Jul 2020 15:25:22 |        |
| <b>File Name</b>              |        |                             |                      |                              | <b>Frequency (MHz)</b>  | 100.61               |        |
| <b>Nucleus</b>                | 13C    | <b>Number of Transients</b> | 49                   | <b>Original Points Count</b> | 16384                   | <b>Points Count</b>  | 131072 |
| <b>Pulse Sequence</b>         | zgpg30 | <b>Solvent</b>              | CHLOROFORM-D         |                              | <b>Sweep Width (Hz)</b> | 24154.59             |        |
| <b>Temperature (degree C)</b> | 27.000 |                             |                      |                              |                         |                      |        |

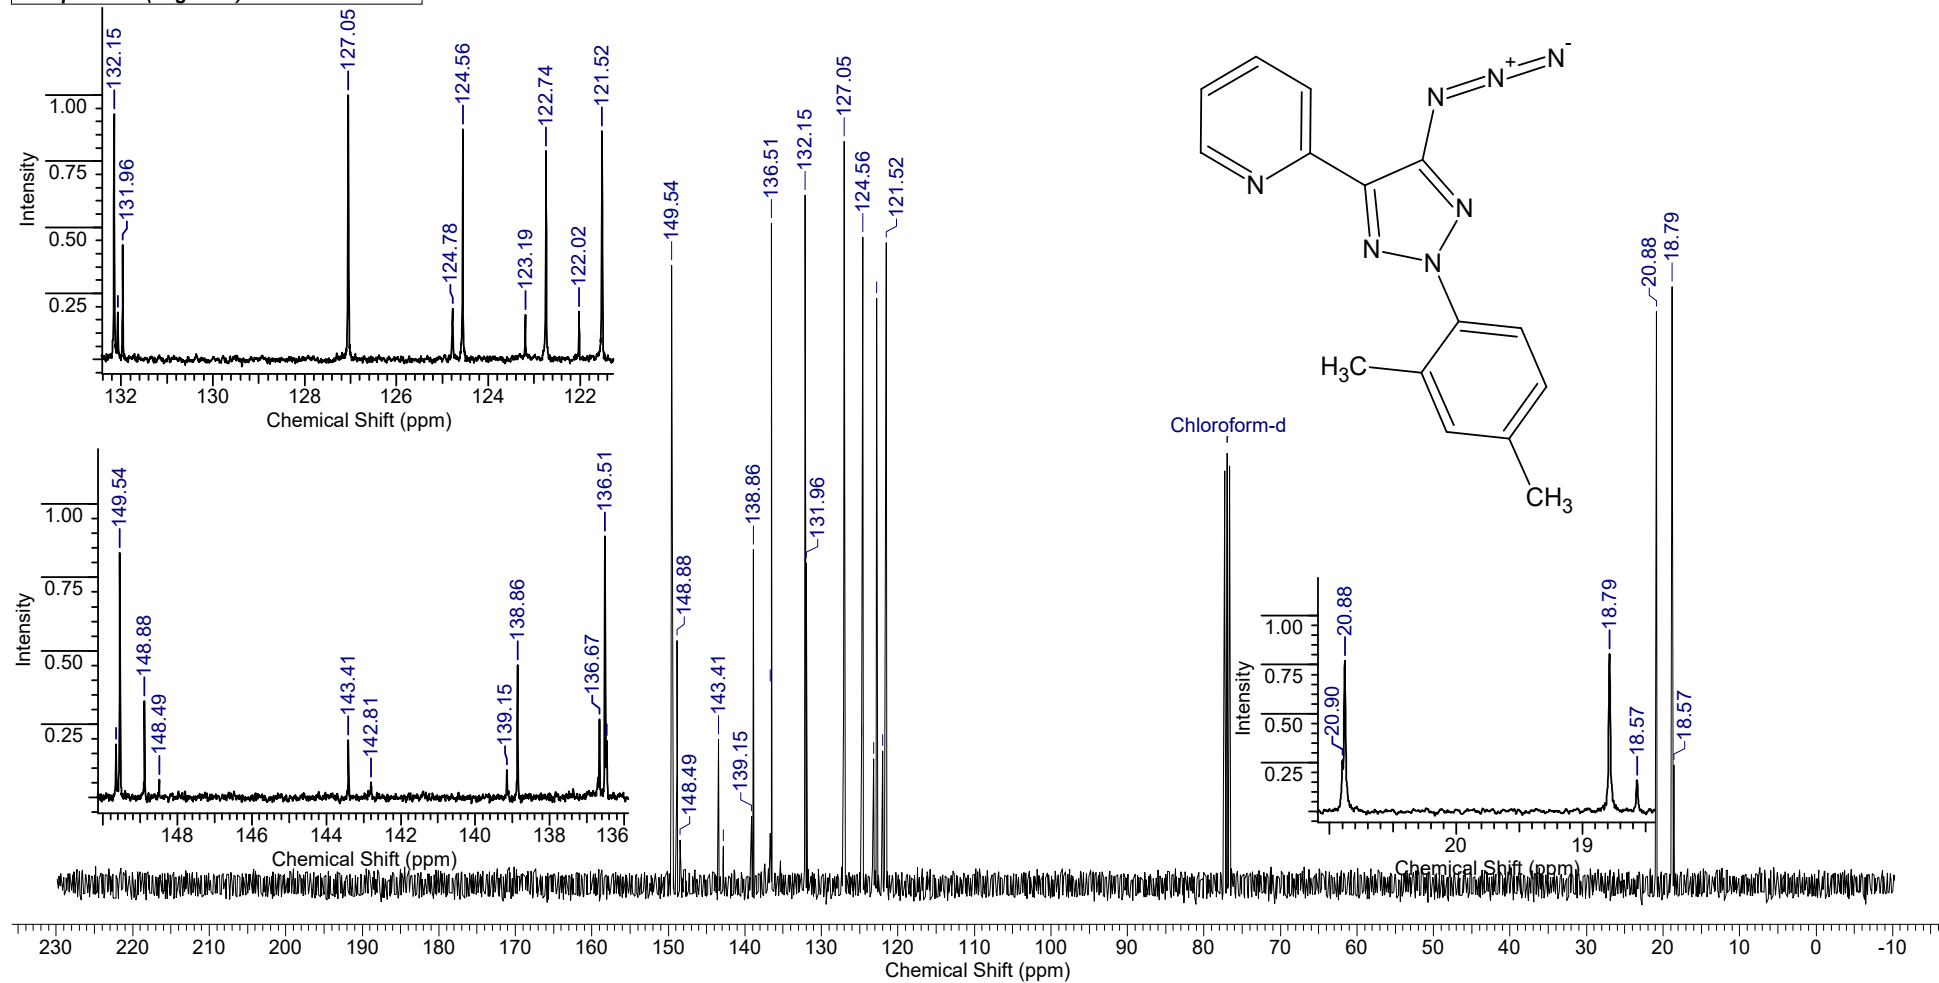

$^{13}\text{C}$  NMR spectrum of **2q** (100.6 MHz,  $\text{CDCl}_3$ )

|                               |        |                             |                      |                              |             |                               |        |
|-------------------------------|--------|-----------------------------|----------------------|------------------------------|-------------|-------------------------------|--------|
| <b>Acquisition Time (sec)</b> | 4.0894 | <b>Comment</b>              | Imported from UXNMR. |                              | <b>Date</b> | 06 Feb 2021 13:32:58          |        |
| <b>File Name</b>              |        | <b>Number of Transients</b> | 4                    | <b>Original Points Count</b> | 32768       | <b>Frequency (MHz)</b>        | 400.13 |
| <b>Nucleus</b>                | 1H     | <b>Solvent</b>              | CHLOROFORM-D         | <b>Sweep Width (Hz)</b>      | 8012.82     | <b>Points Count</b>           | 131072 |
| <b>Pulse Sequence</b>         | zg30   |                             |                      |                              |             | <b>Temperature (degree C)</b> | 27.000 |

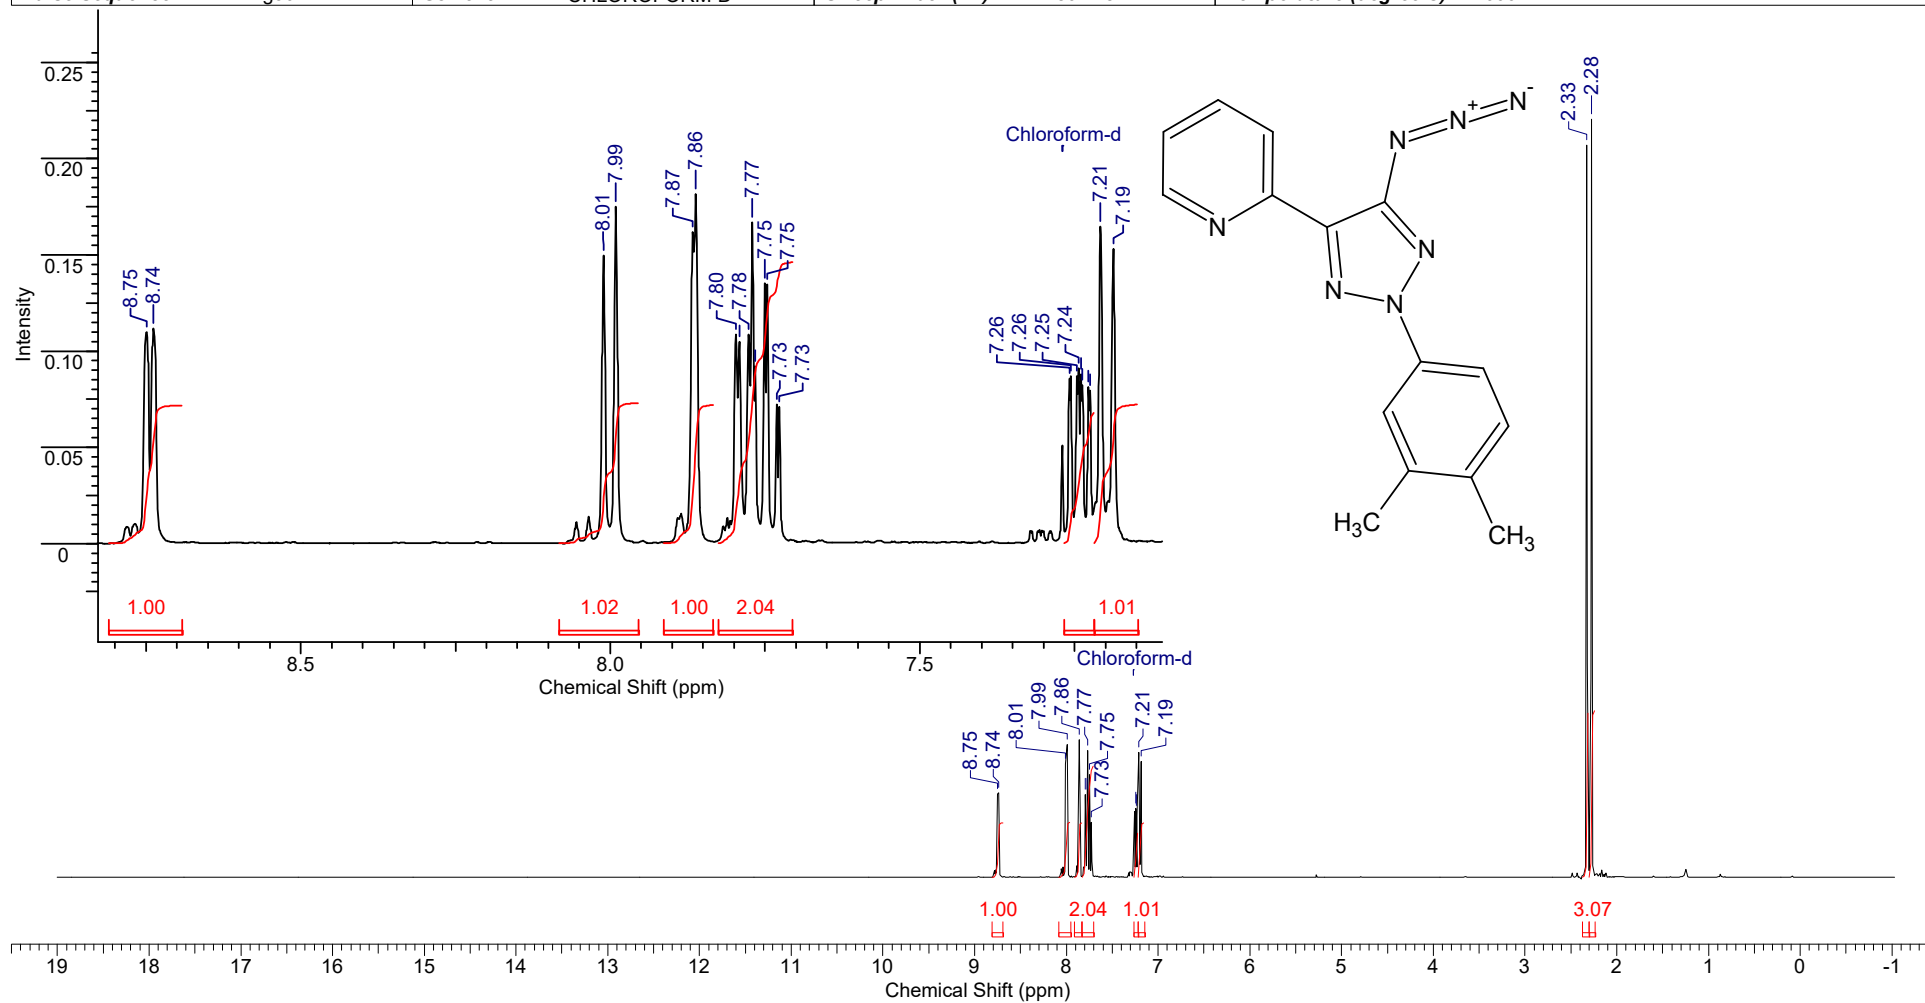

$^1\text{H}$  NMR spectrum of **2r** (400.1 MHz,  $\text{CDCl}_3$ )

|                               |        |                             |                      |                              |                        |                               |        |
|-------------------------------|--------|-----------------------------|----------------------|------------------------------|------------------------|-------------------------------|--------|
| <b>Acquisition Time (sec)</b> | 0.6783 | <b>Comment</b>              | Imported from UXMNR. |                              | <b>Date</b>            | 06 Feb 2021 13:31:12          |        |
| <b>File Name</b>              |        |                             |                      |                              | <b>Frequency (MHz)</b> | 100.61                        |        |
| <b>Nucleus</b>                | 13C    | <b>Number of Transients</b> | 65                   | <b>Original Points Count</b> | 16384                  | <b>Points Count</b>           | 131072 |
| <b>Pulse Sequence</b>         | zgpg30 | <b>Solvent</b>              | CHLOROFORM-D         | <b>Sweep Width (Hz)</b>      | 24154.59               | <b>Temperature (degree C)</b> | 27.000 |

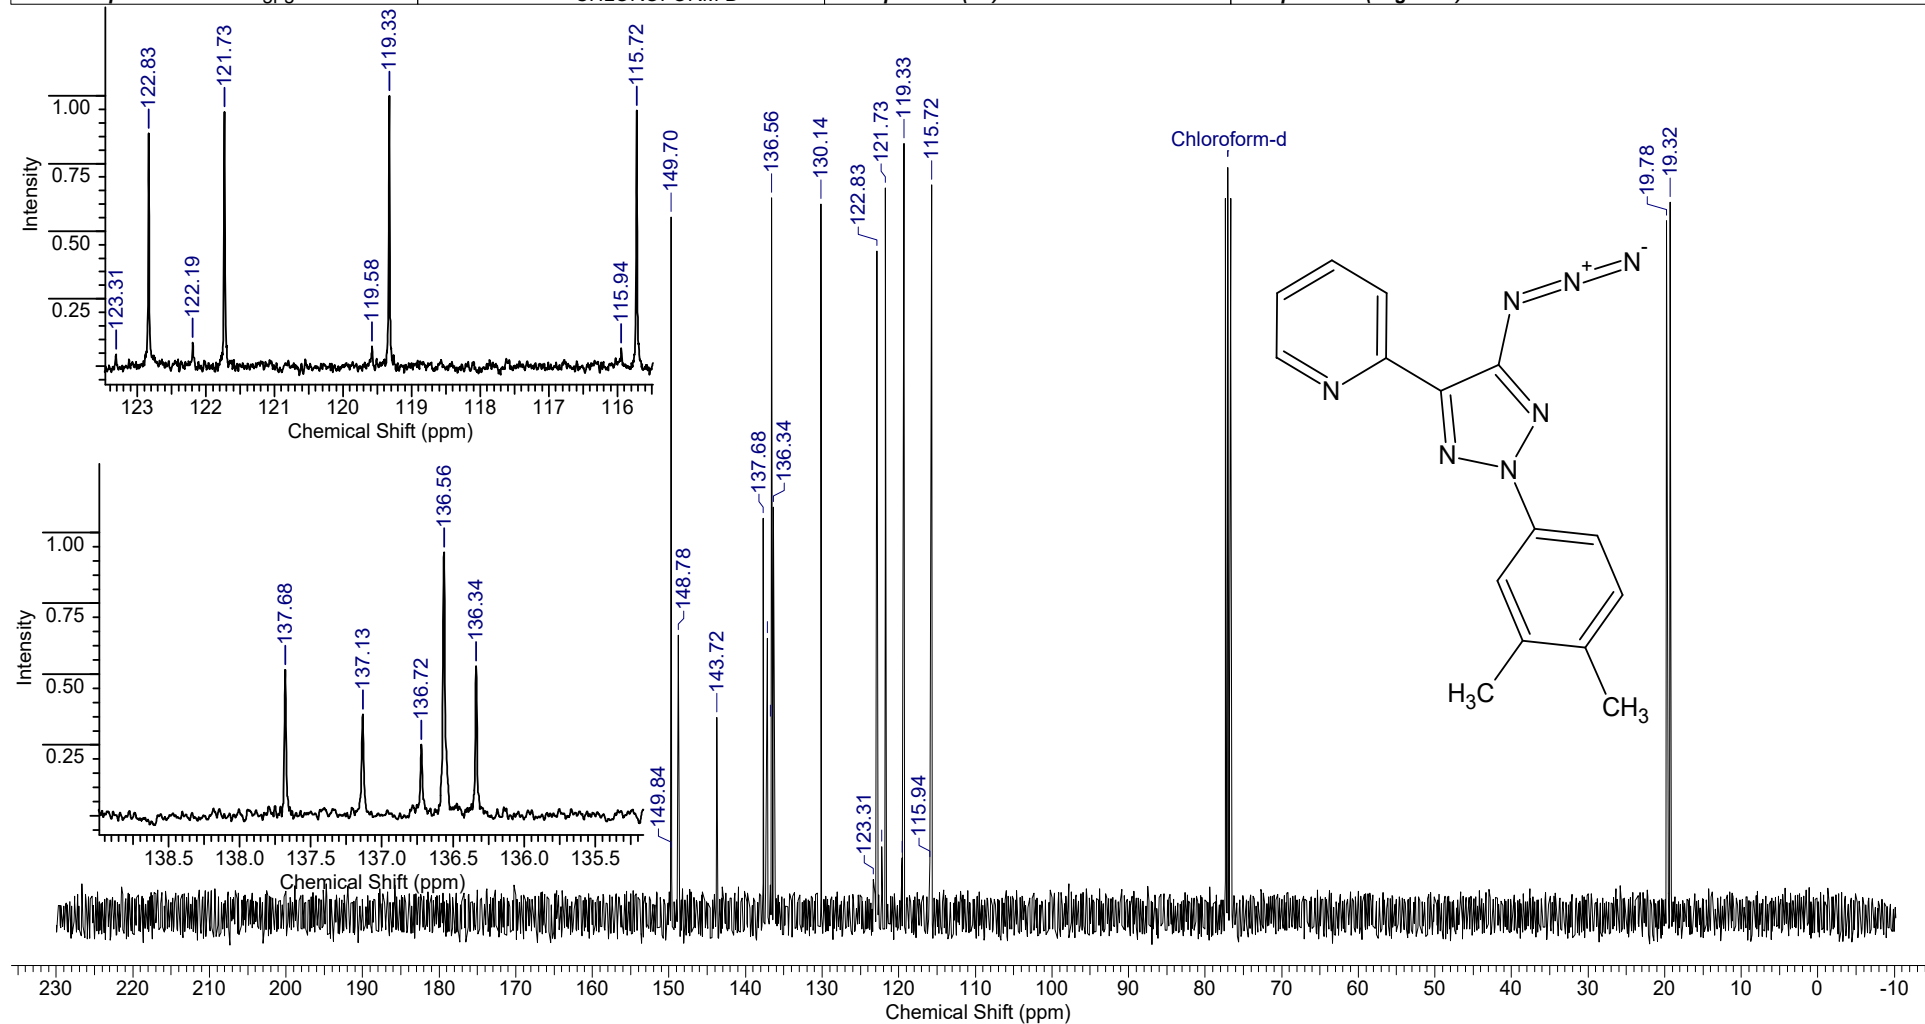

$^{13}\text{C}$  NMR spectrum of **2r** (100.6 MHz,  $\text{CDCl}_3$ )

|                               |        |                             |                      |                              |                      |
|-------------------------------|--------|-----------------------------|----------------------|------------------------------|----------------------|
| <b>Acquisition Time (sec)</b> | 4.0894 | <b>Comment</b>              | Imported from UXMNR. | <b>Date</b>                  | 19 Feb 2020 17:45:08 |
| <b>File Name</b>              |        | <b>Number of Transients</b> | 4                    | <b>Original Points Count</b> | 32768                |
| <b>Nucleus</b>                | 1H     | <b>Solvent</b>              | CHLOROFORM-D         | <b>Points Count</b>          | 131072               |
| <b>Pulse Sequence</b>         | zg30   | <b>Sweep Width (Hz)</b>     |                      |                              | 8012.82              |
| <b>Temperature (degree C)</b> | 27.000 |                             |                      |                              |                      |

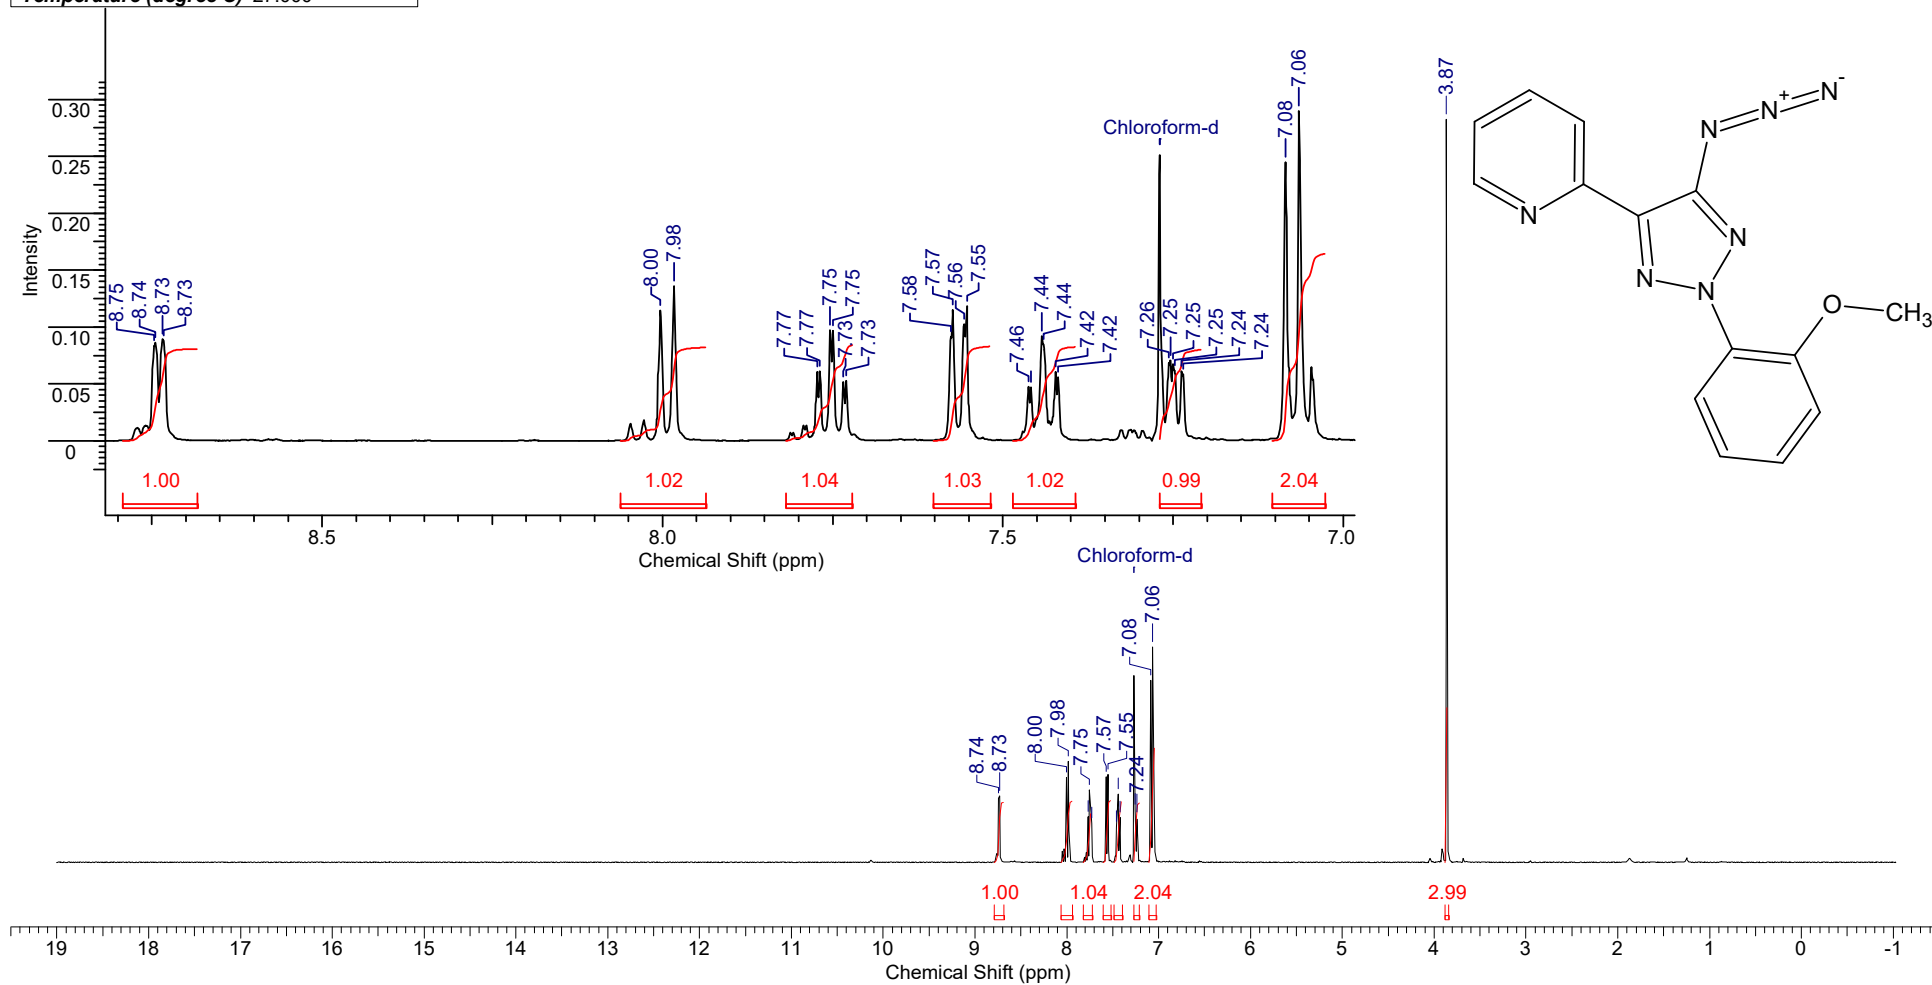



$^1\text{H}$  NMR spectrum of **2s** (400.1 MHz,  $\text{CDCl}_3$ )

|                               |                 |                             |                      |                              |             |                               |        |
|-------------------------------|-----------------|-----------------------------|----------------------|------------------------------|-------------|-------------------------------|--------|
| <b>Acquisition Time (sec)</b> | 0.6783          | <b>Comment</b>              | Imported from UXMNR. |                              | <b>Date</b> | 19 Feb 2020 17:49:56          |        |
| <b>File Name</b>              |                 | <b>Number of Transients</b> | 113                  | <b>Original Points Count</b> | 16384       | <b>Frequency (MHz)</b>        | 100.61 |
| <b>Nucleus</b>                | <sup>13</sup> C | <b>Solvent</b>              |                      | <b>Sweep Width (Hz)</b>      | 24154.59    | <b>Points Count</b>           | 131072 |
| <b>Pulse Sequence</b>         | zgpg30          |                             |                      |                              |             | <b>Temperature (degree C)</b> | 27.000 |

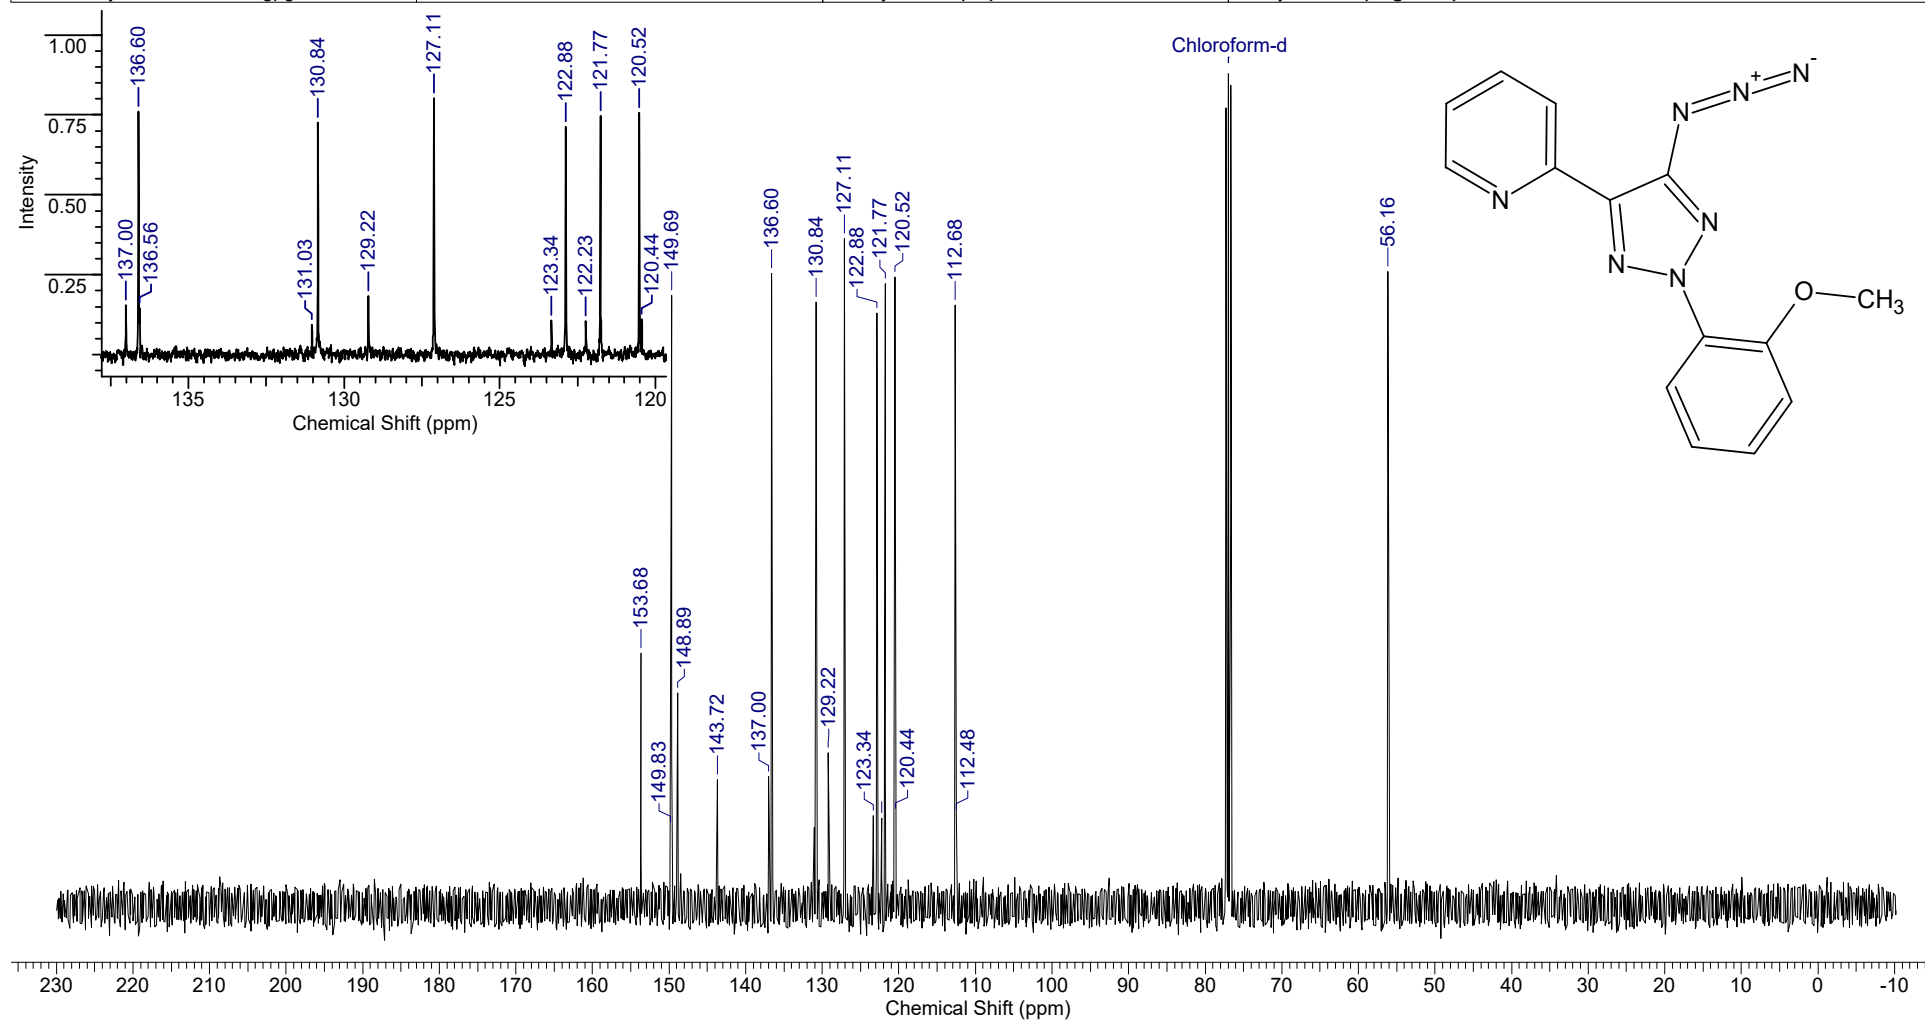

$^{13}\text{C}$  NMR spectrum of **2s** (100.6 MHz,  $\text{CDCl}_3$ )

|                               |        |                             |                      |                              |                         |                      |        |
|-------------------------------|--------|-----------------------------|----------------------|------------------------------|-------------------------|----------------------|--------|
| <b>Acquisition Time (sec)</b> | 4.0894 | <b>Comment</b>              | Imported from UXMNR. |                              | <b>Date</b>             | 26 Feb 2020 17:55:20 |        |
| <b>File Name</b>              |        |                             |                      |                              | <b>Frequency (MHz)</b>  | 400.13               |        |
| <b>Nucleus</b>                | 1H     | <b>Number of Transients</b> | 4                    | <b>Original Points Count</b> | 32768                   | <b>Points Count</b>  | 131072 |
| <b>Pulse Sequence</b>         | zg30   | <b>Solvent</b>              | CHLOROFORM-D         |                              | <b>Sweep Width (Hz)</b> | 8012.82              |        |
| <b>Temperature (degree C)</b> | 27.000 |                             |                      |                              |                         |                      |        |

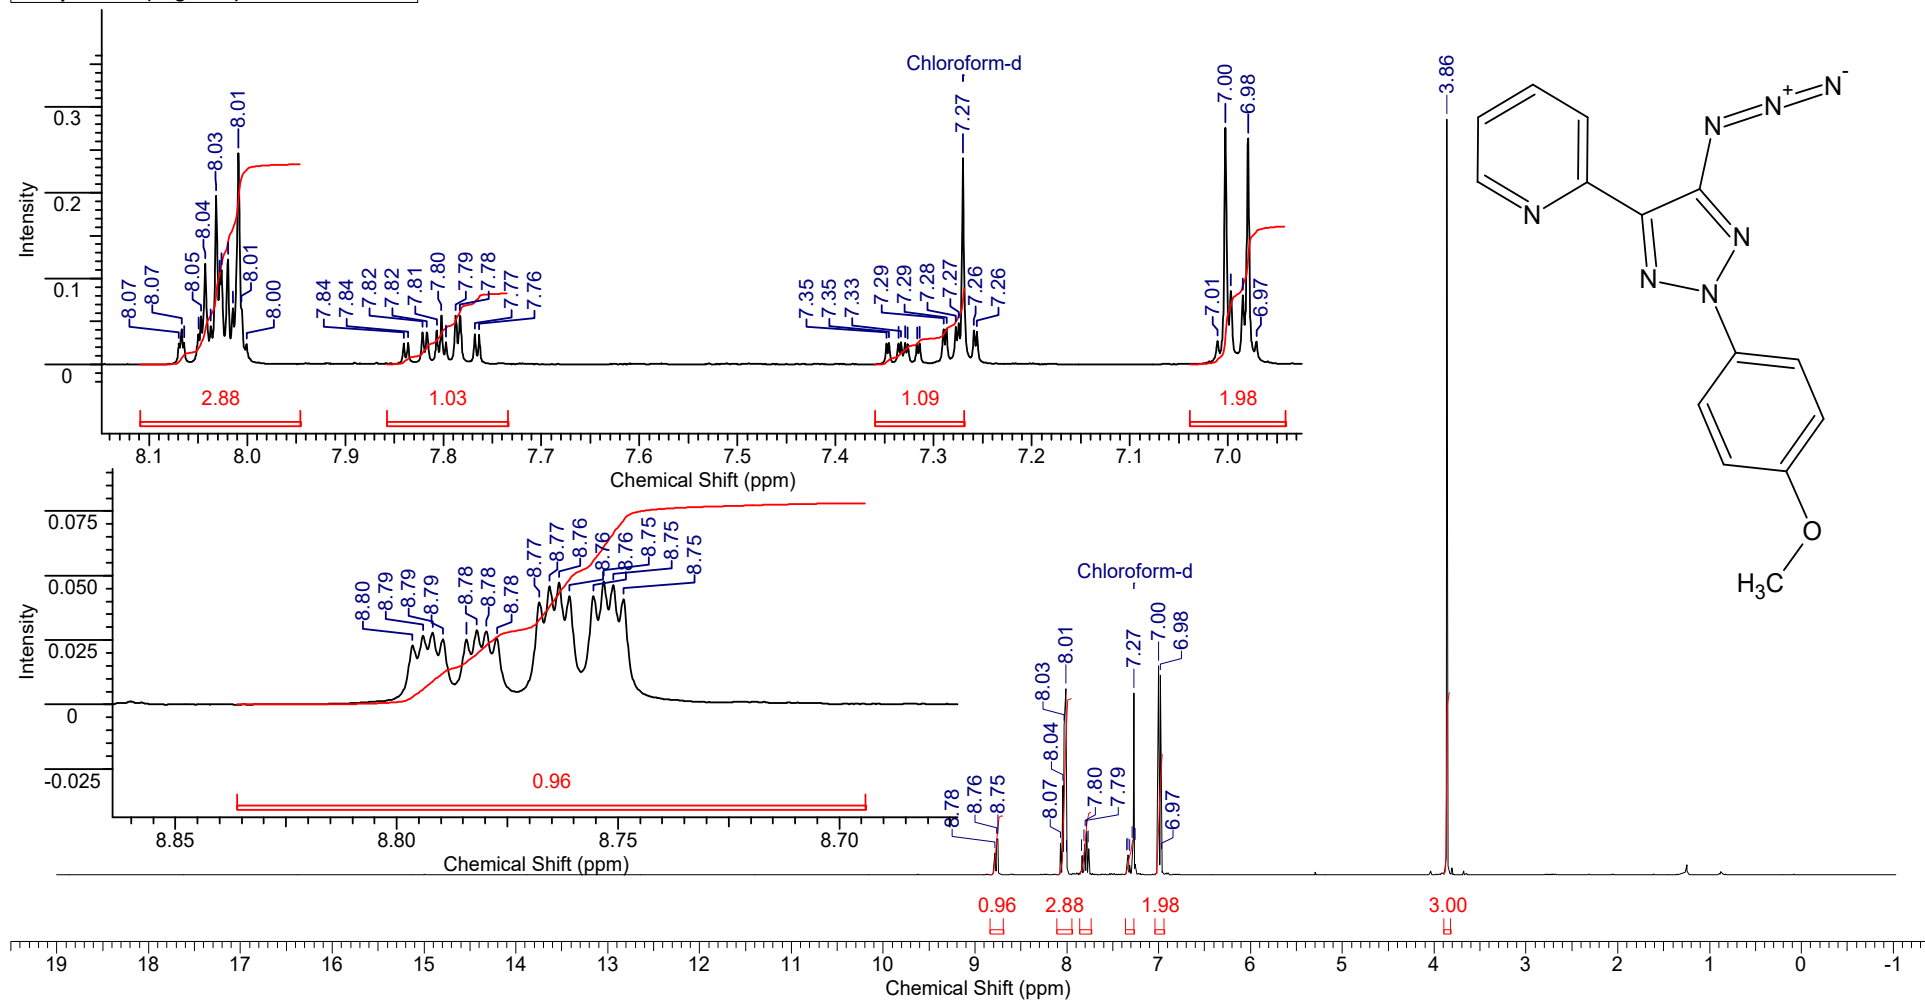

$^1\text{H}$  NMR spectrum of **2t** (400.1 MHz,  $\text{CDCl}_3$ )

|                               |        |                             |                      |                              |                        |                               |        |
|-------------------------------|--------|-----------------------------|----------------------|------------------------------|------------------------|-------------------------------|--------|
| <b>Acquisition Time (sec)</b> | 0.6783 | <b>Comment</b>              | Imported from UXMNR. |                              | <b>Date</b>            | 26 Feb 2020 18:00:00          |        |
| <b>File Name</b>              |        |                             |                      |                              | <b>Frequency (MHz)</b> | 100.61                        |        |
| <b>Nucleus</b>                | 13C    | <b>Number of Transients</b> | 106                  | <b>Original Points Count</b> | 16384                  | <b>Points Count</b>           | 131072 |
| <b>Pulse Sequence</b>         | zgpg30 | <b>Solvent</b>              | CHLOROFORM-D         | <b>Sweep Width (Hz)</b>      | 24154.59               | <b>Temperature (degree C)</b> | 27.000 |

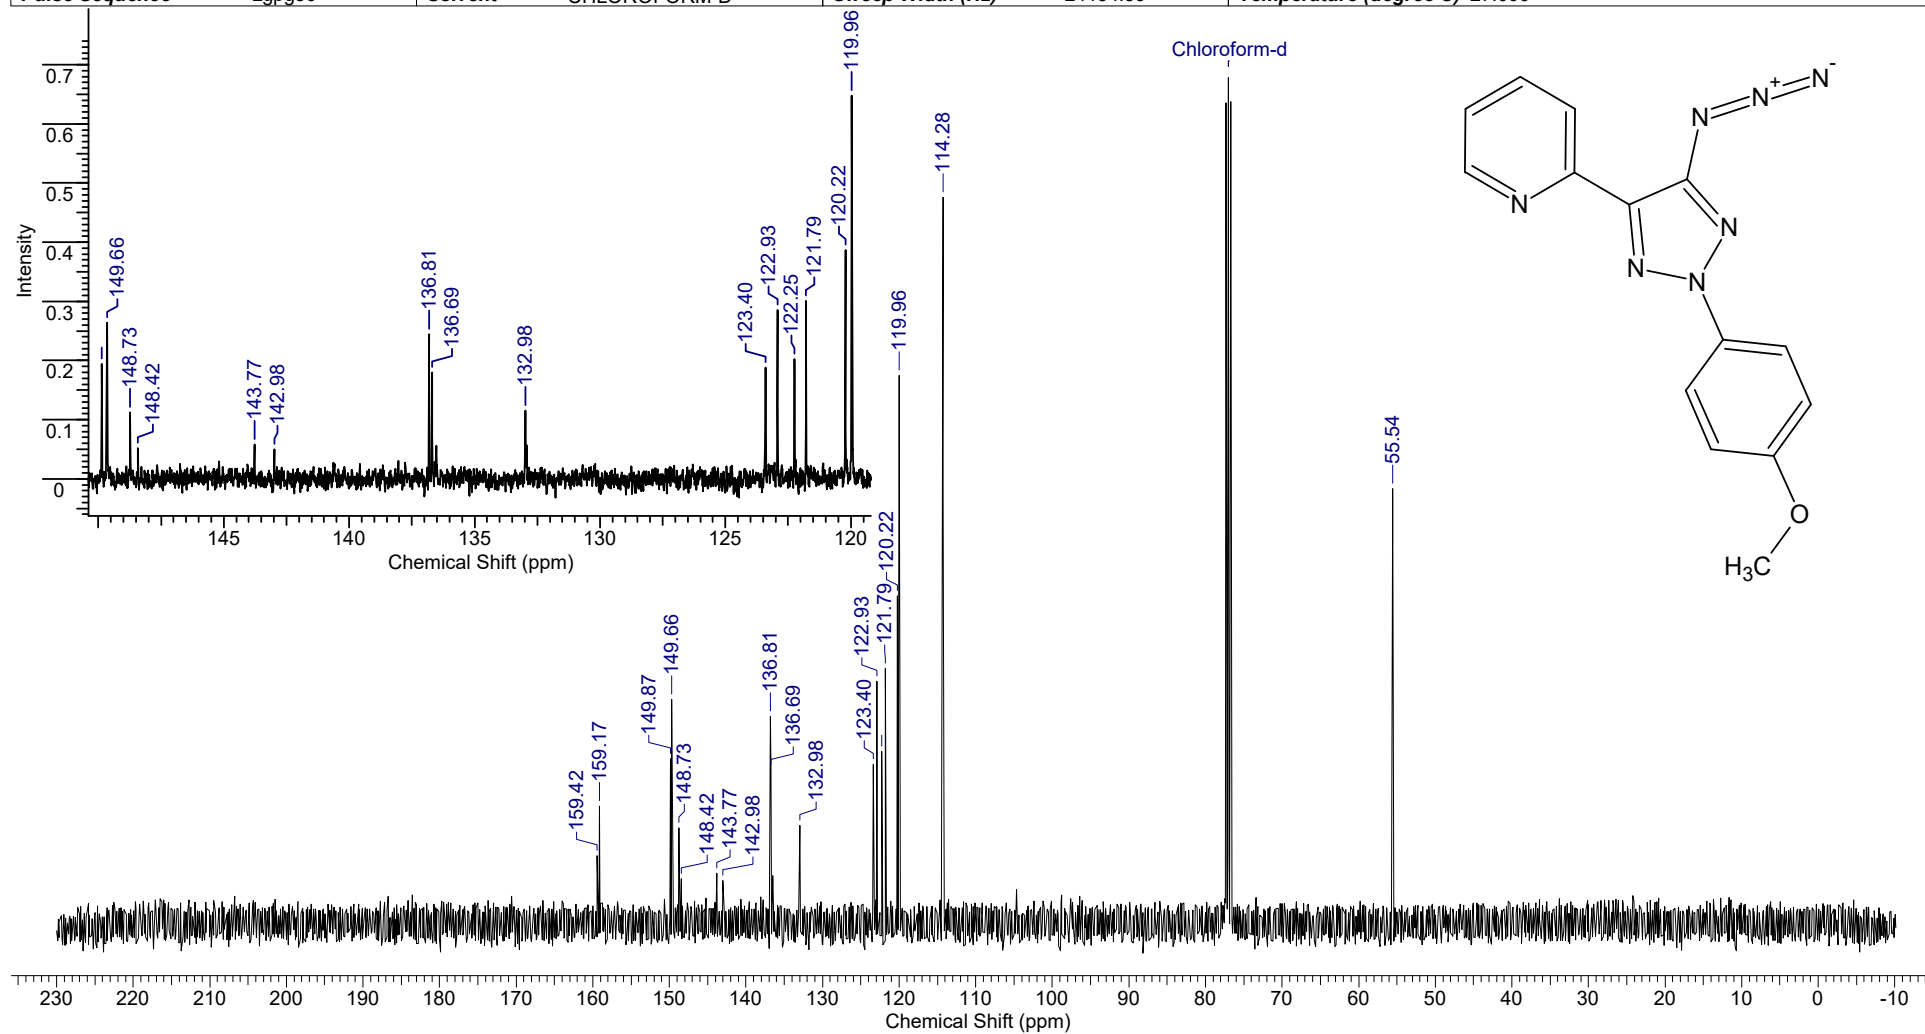

<sup>13</sup>C NMR spectrum of **2t** (100.6 MHz, CDCl<sub>3</sub>)

6 Apr 2021

|                        |        |                      |                      |                        |                      |
|------------------------|--------|----------------------|----------------------|------------------------|----------------------|
| Acquisition Time (sec) | 4.0894 | Comment              | Imported from UXNMR. | Date                   | 06 Apr 2021 14:30:54 |
| File Name              |        |                      |                      | Frequency (MHz)        | 400.13               |
| Nucleus                | 1H     | Number of Transients | 4                    | Original Points Count  | 32768                |
| Pulse Sequence         | zg30   | Solvent              | Chloroform-D         | Sweep Width (Hz)       | 8012.82              |
|                        |        |                      |                      | Points Count           | 131072               |
|                        |        |                      |                      | Temperature (degree C) | 27.000               |

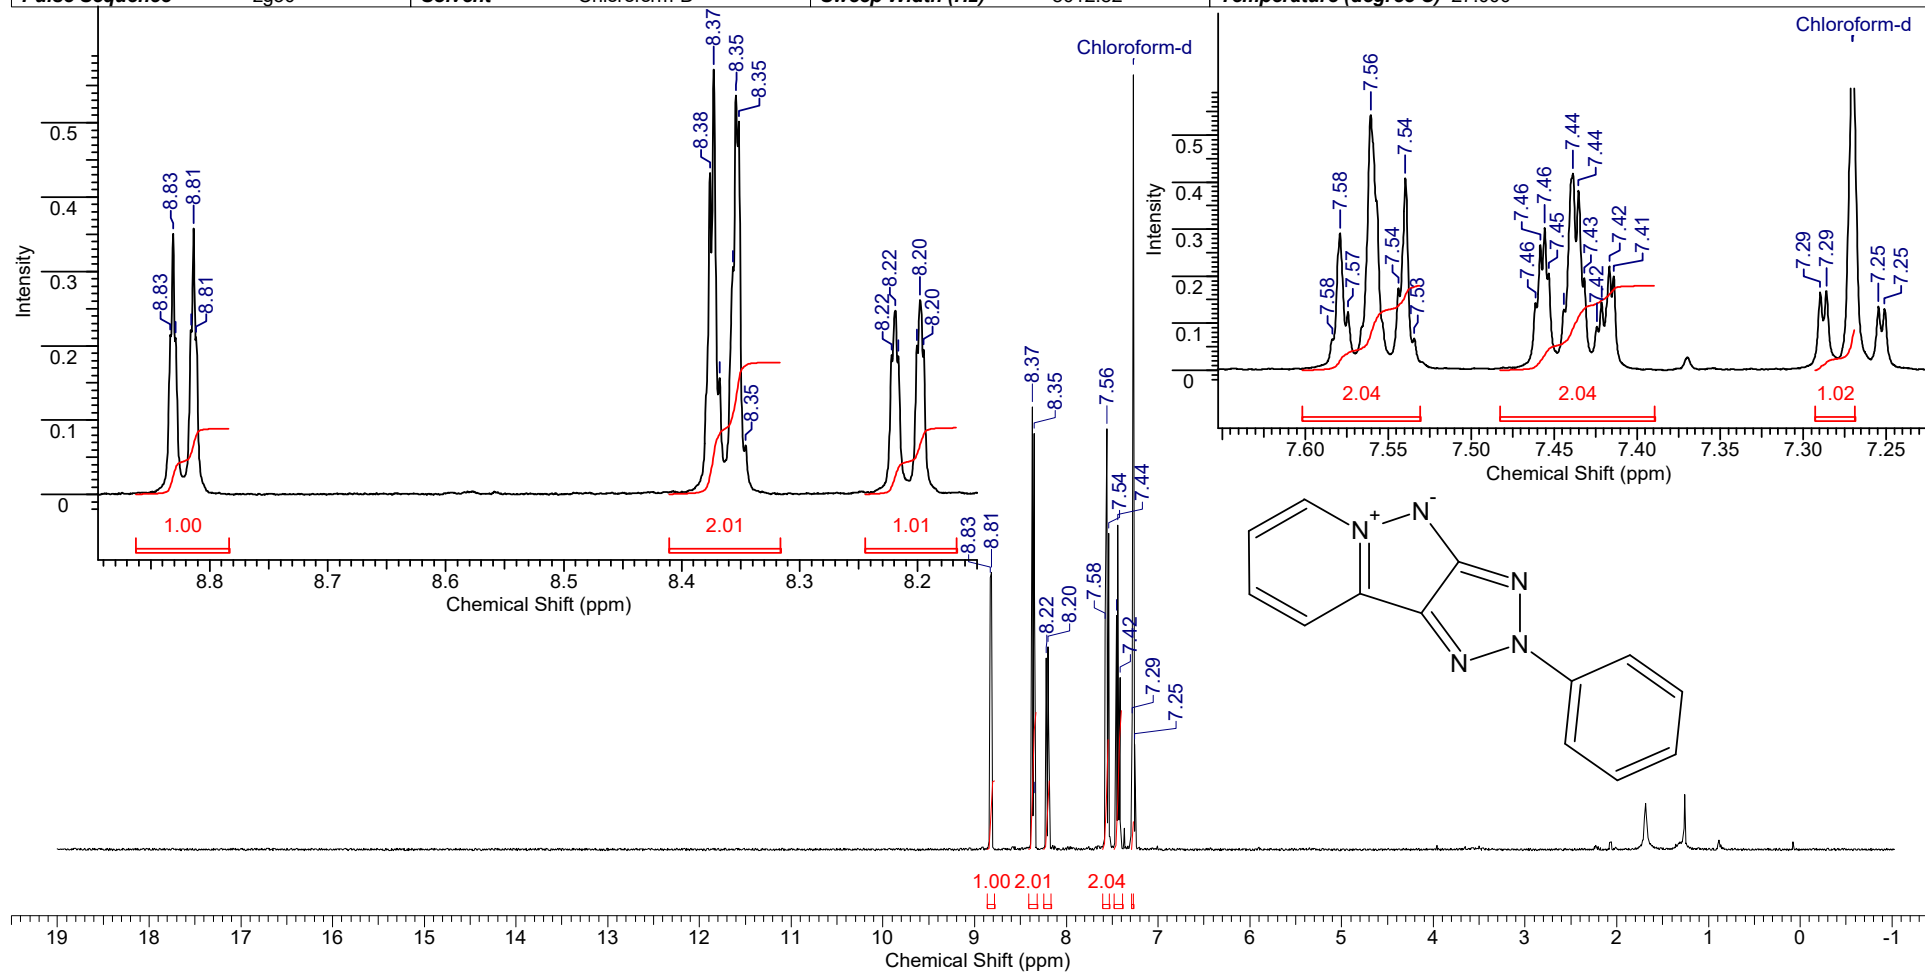

$^1\text{H}$  NMR spectrum of **3a** (400.1 MHz,  $\text{CDCl}_3$ )



|                        |                      |                      |                                    |                      |                      |
|------------------------|----------------------|----------------------|------------------------------------|----------------------|----------------------|
| Acquisition Time (sec) | 0.6783               | Comment              | 5 mm QNP 1H/13C/31P/19F Z3182/0165 | Date                 | 03 Sep 2020 09:25:20 |
| Date Stamp             | 03 Sep 2020 09:25:20 |                      |                                    |                      |                      |
| File Name              |                      |                      |                                    | Frequency (MHz)      | 100.61               |
| Nucleus                | 13C                  | Number of Transients | 1242                               | Origin               | spect                |
| Owner                  | root                 | Points Count         | 131072                             | Pulse Sequence       | zgpg30               |
| SW(cyclical) (Hz)      | 24154.59             | Solvent              | CHLOROFORM-d                       | Spectrum Offset (Hz) | 11062.1953           |
| Temperature (degree C) | 27.000               |                      |                                    | Sweep Width (Hz)     | 24154.41             |

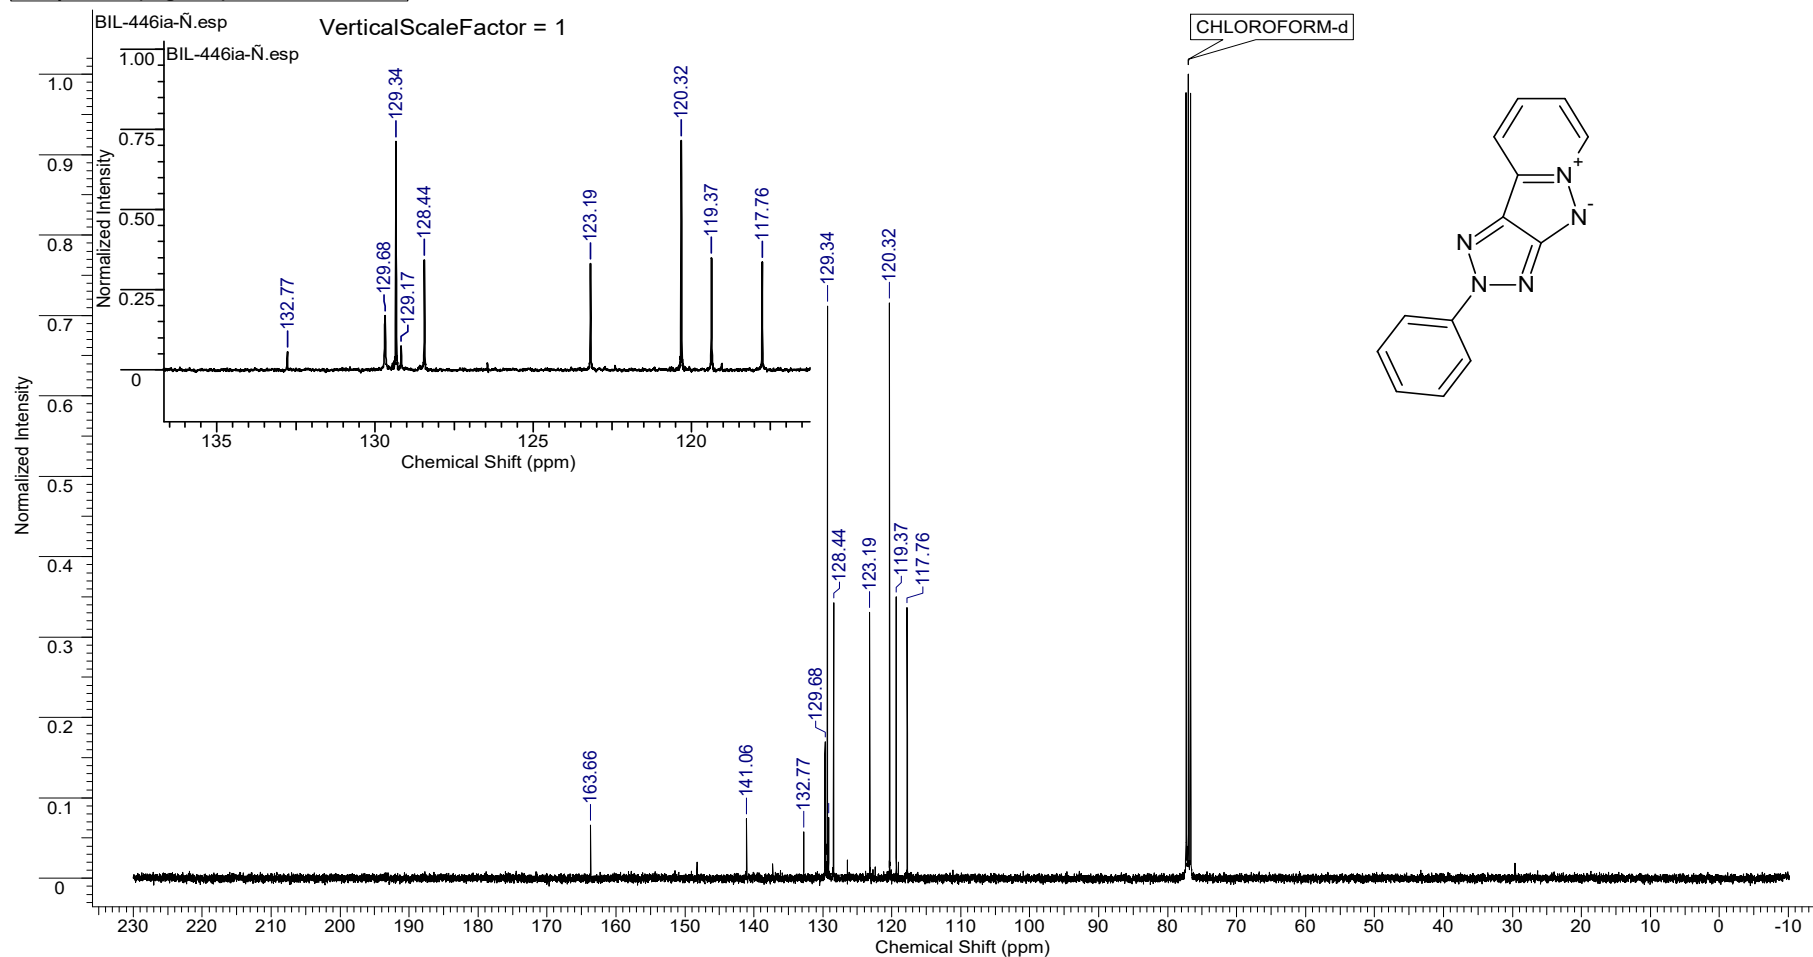

$^{13}\text{C}$  NMR spectrum of **3a** (100.6 MHz,  $\text{CDCl}_3$ )

|                               |        |                             |                      |                              |                      |
|-------------------------------|--------|-----------------------------|----------------------|------------------------------|----------------------|
| <b>Acquisition Time (sec)</b> | 4.0894 | <b>Comment</b>              | Imported from UXNMR. | <b>Date</b>                  | 28 Oct 2020 17:43:22 |
| <b>File Name</b>              |        |                             |                      | <b>Frequency (MHz)</b>       | 400.13               |
| <b>Nucleus</b>                | 1H     | <b>Number of Transients</b> | 4                    | <b>Original Points Count</b> | 32768                |
| <b>Pulse Sequence</b>         | zg30   | <b>Solvent</b>              | CHLOROFORM-D         | <b>Points Count</b>          | 131072               |
| <b>Temperature (degree C)</b> | 27.000 |                             |                      | <b>Sweep Width (Hz)</b>      | 8012.82              |

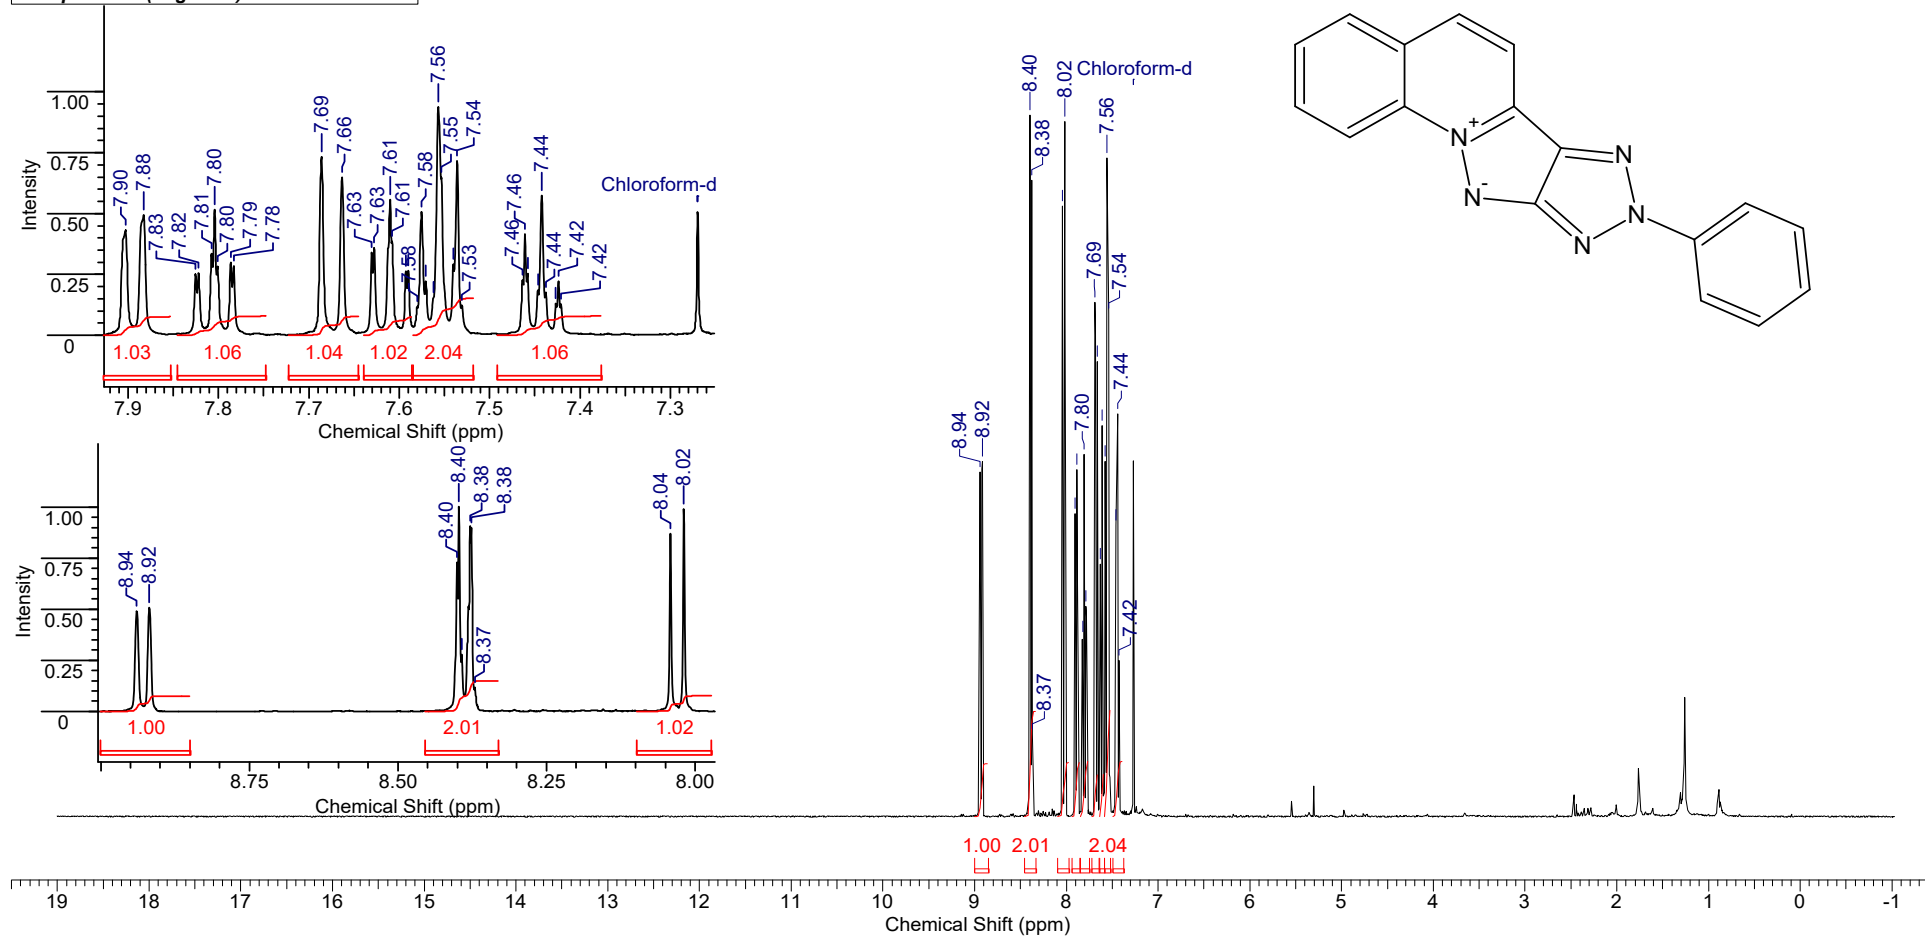

<sup>1</sup>H NMR spectrum of **3b** (400.1 MHz, CDCl<sub>3</sub>)

|                               |                 |                             |                      |                              |                         |                      |        |
|-------------------------------|-----------------|-----------------------------|----------------------|------------------------------|-------------------------|----------------------|--------|
| <b>Acquisition Time (sec)</b> | 0.6783          | <b>Comment</b>              | Imported from UXNMR. |                              | <b>Date</b>             | 28 Oct 2020 17:41:12 |        |
| <b>File Name</b>              |                 |                             |                      |                              | <b>Frequency (MHz)</b>  | 100.61               |        |
| <b>Nucleus</b>                | <sup>13</sup> C | <b>Number of Transients</b> | 164                  | <b>Original Points Count</b> | 16384                   | <b>Points Count</b>  | 131072 |
| <b>Pulse Sequence</b>         | zgpg30          | <b>Solvent</b>              | CHLOROFORM-D         |                              | <b>Sweep Width (Hz)</b> | 24154.59             |        |
| <b>Temperature (degree C)</b> | 27.000          |                             |                      |                              |                         |                      |        |

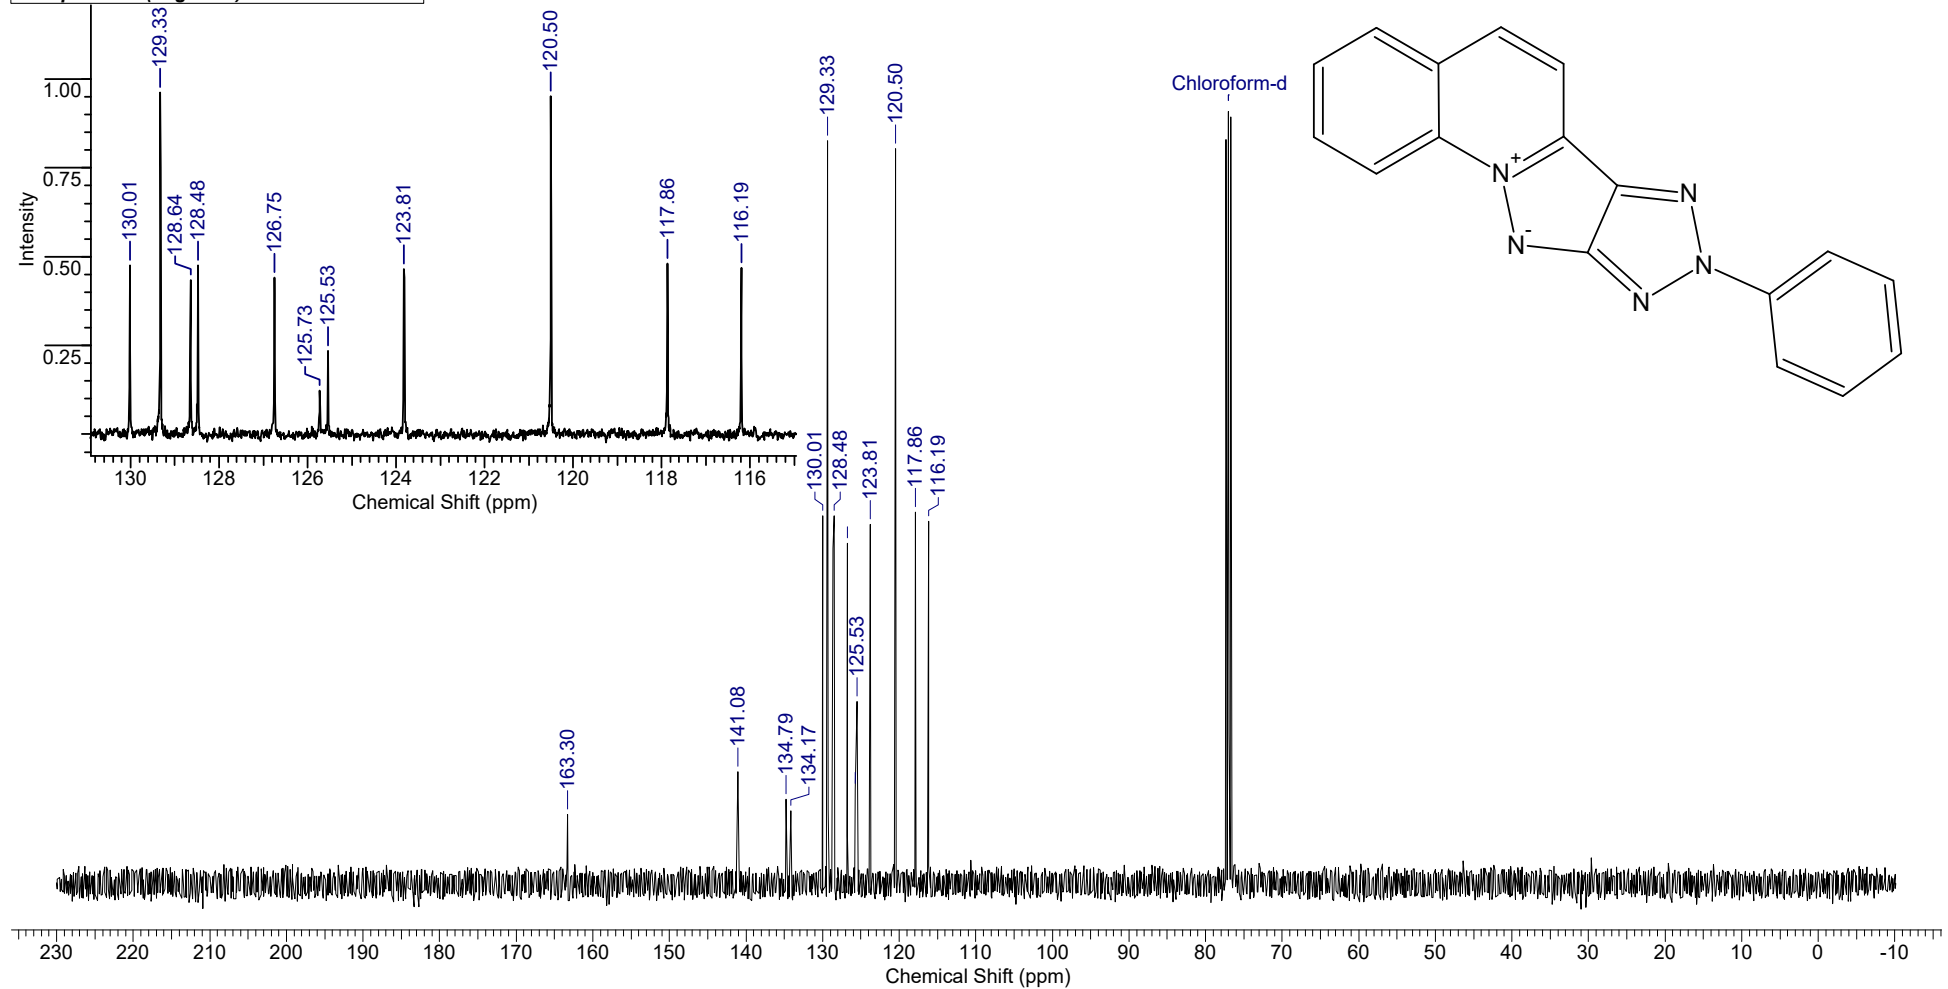

$^{13}\text{C}$  NMR spectrum of **3b** (100.6 MHz,  $\text{CDCl}_3$ )

|                               |        |                             |                      |                              |                        |                               |        |
|-------------------------------|--------|-----------------------------|----------------------|------------------------------|------------------------|-------------------------------|--------|
| <b>Acquisition Time (sec)</b> | 4.0894 | <b>Comment</b>              | Imported from UXNMR. |                              | <b>Date</b>            | 14 Jan 2021 11:03:30          |        |
| <b>File Name</b>              |        |                             |                      |                              | <b>Frequency (MHz)</b> | 400.13                        |        |
| <b>Nucleus</b>                | 1H     | <b>Number of Transients</b> | 4                    | <b>Original Points Count</b> | 32768                  | <b>Points Count</b>           | 131072 |
| <b>Pulse Sequence</b>         | zg30   | <b>Solvent</b>              | DMSO-D6              | <b>Sweep Width (Hz)</b>      | 8012.82                | <b>Temperature (degree C)</b> | 27.000 |

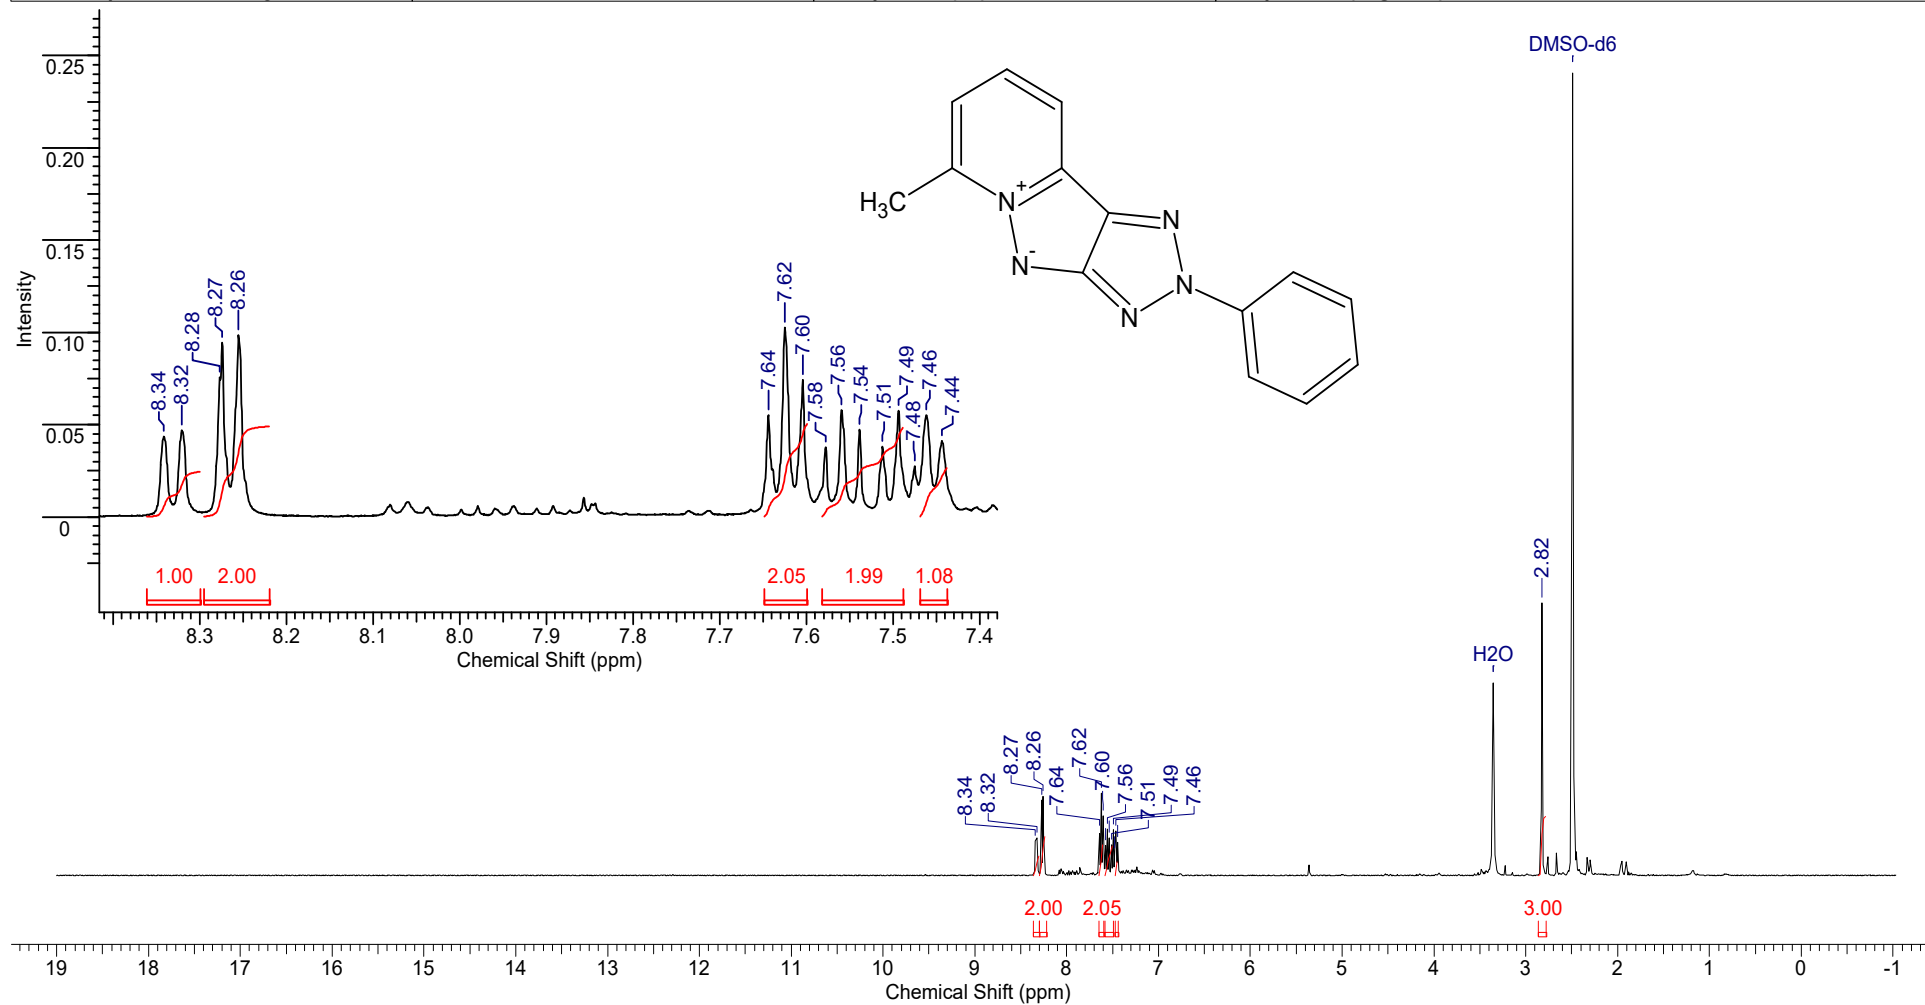

$^1\text{H}$  NMR spectrum of **3c** (400.1 MHz,  $\text{CDCl}_3$ )

|                               |                 |                             |                      |                              |             |                               |        |
|-------------------------------|-----------------|-----------------------------|----------------------|------------------------------|-------------|-------------------------------|--------|
| <b>Acquisition Time (sec)</b> | 0.6783          | <b>Comment</b>              | Imported from UXNMR. |                              | <b>Date</b> | 14 Jan 2021 11:30:54          |        |
| <b>File Name</b>              |                 | <b>Number of Transients</b> | 641                  | <b>Original Points Count</b> | 16384       | <b>Frequency (MHz)</b>        | 100.61 |
| <b>Nucleus</b>                | <sup>13</sup> C | <b>Solvent</b>              | DMSO-D6              | <b>Sweep Width (Hz)</b>      | 24154.59    | <b>Points Count</b>           | 131072 |
| <b>Pulse Sequence</b>         | zgpg30          |                             |                      |                              |             | <b>Temperature (degree C)</b> | 27.000 |

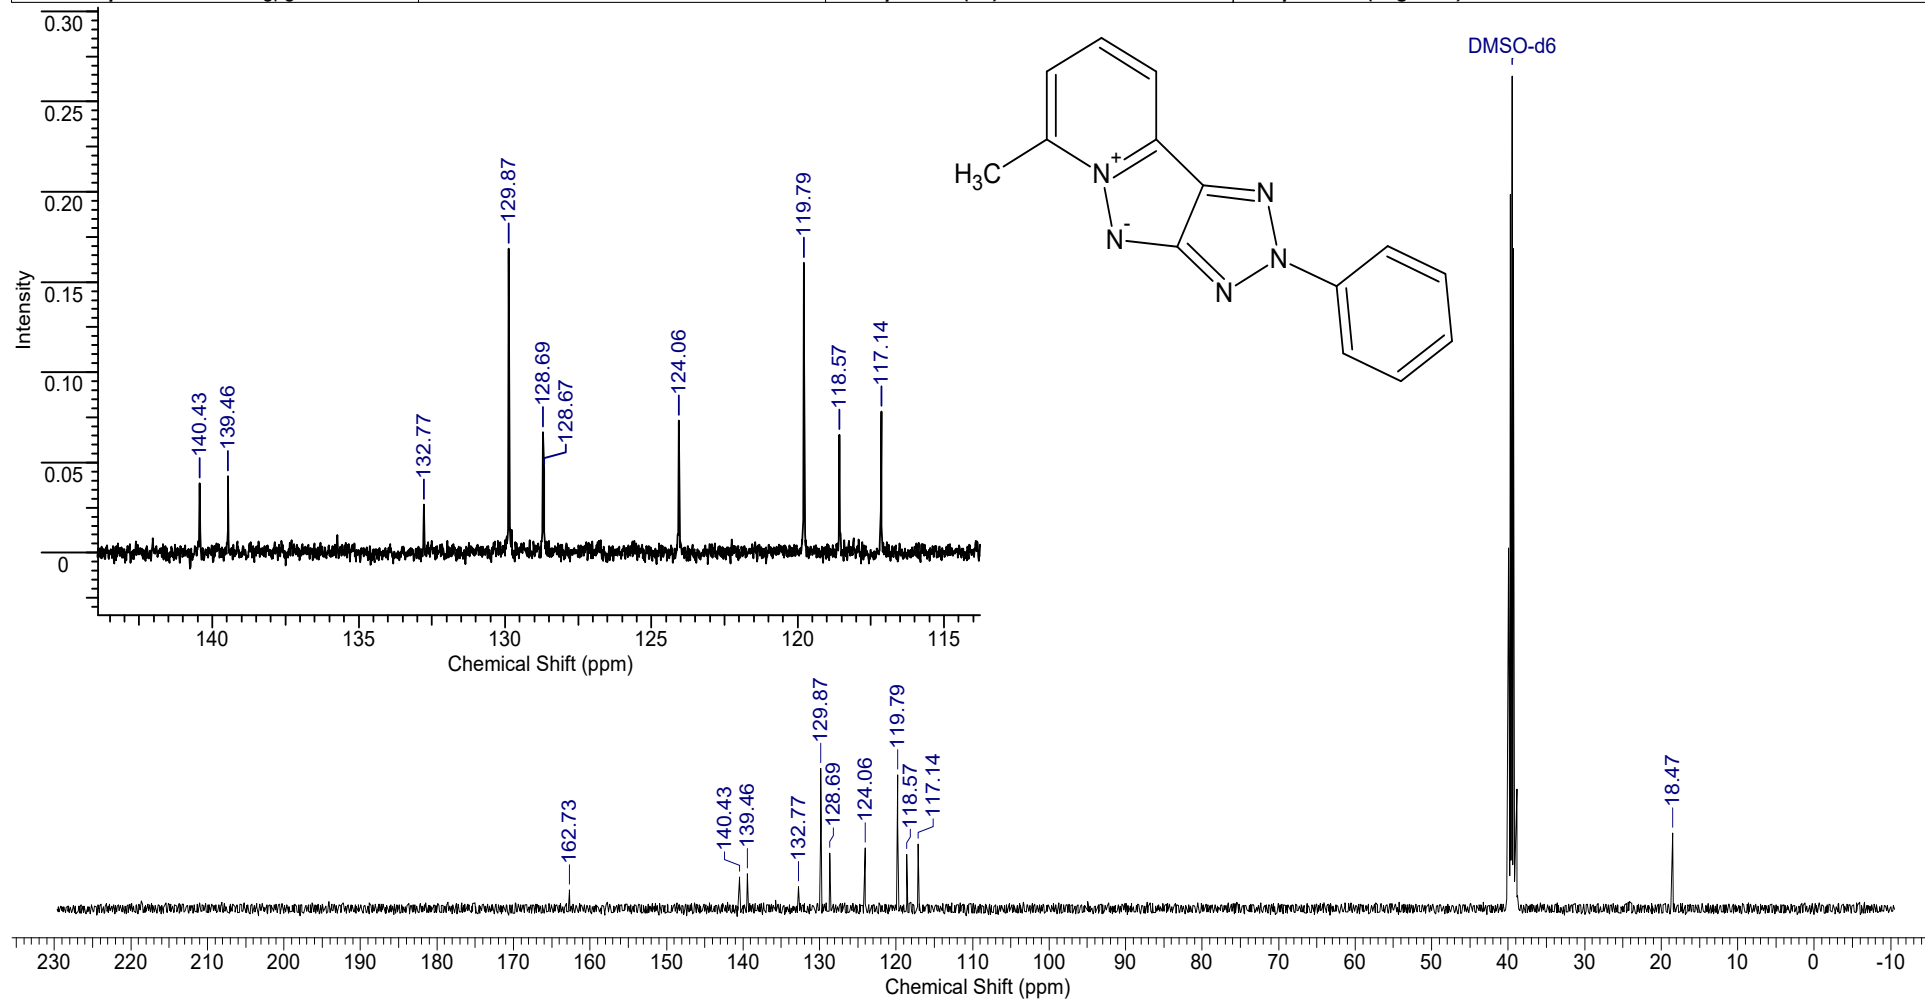



$^{13}\text{C}$  NMR spectrum of **3c** (100.6 MHz,  $\text{CDCl}_3$ )

|                               |                |                              |                      |                         |                      |
|-------------------------------|----------------|------------------------------|----------------------|-------------------------|----------------------|
| <b>Acquisition Time (sec)</b> | 4.0894         | <b>Comment</b>               | Imported from UXNMR. | <b>Date</b>             | 09 Feb 2021 14:46:34 |
| <b>File Name</b>              |                | <b>Number of Transients</b>  | 4                    | <b>Frequency (MHz)</b>  | 400.13               |
| <b>Nucleus</b>                | <sup>1</sup> H | <b>Original Points Count</b> | 32768                | <b>Points Count</b>     | 131072               |
| <b>Pulse Sequence</b>         | zg30           | <b>Solvent</b>               | CHLOROFORM-D         | <b>Sweep Width (Hz)</b> | 8012.82              |
| <b>Temperature (degree C)</b> | 27.000         |                              |                      |                         |                      |

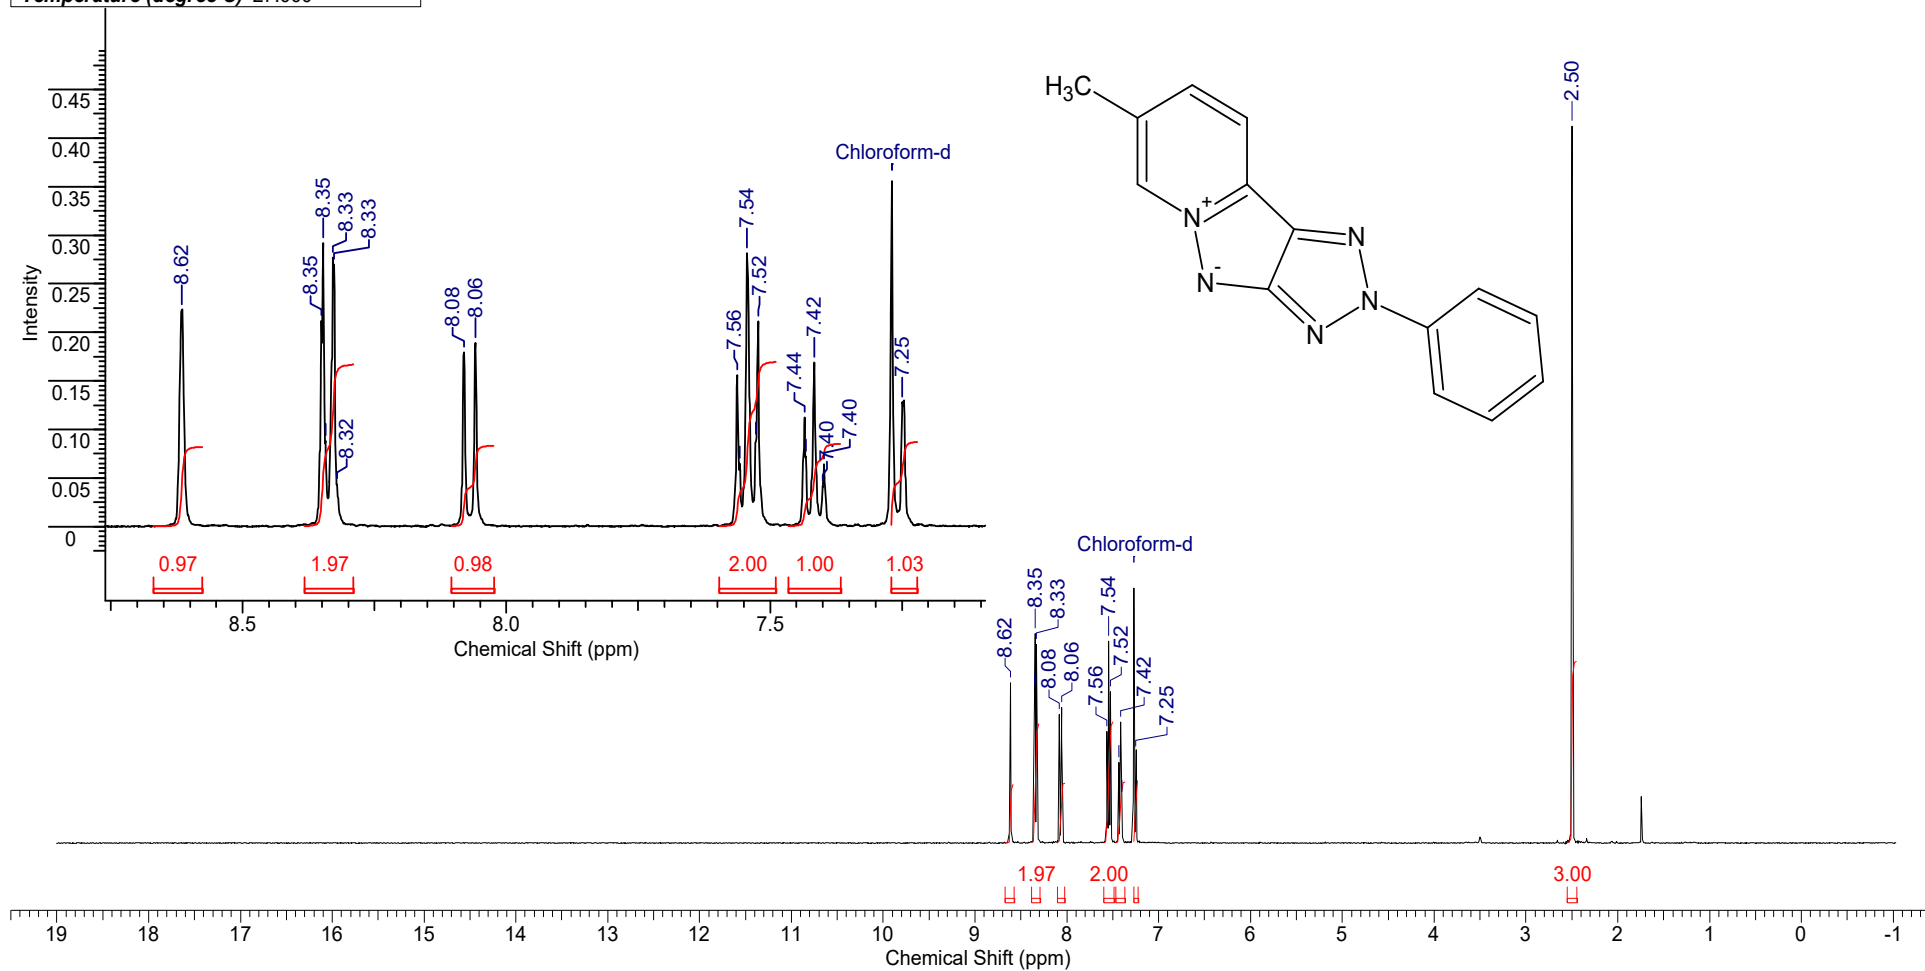

$^1\text{H}$  NMR spectrum of **3d** (400.1 MHz,  $\text{CDCl}_3$ )

|                               |                 |                              |                      |                               |                      |
|-------------------------------|-----------------|------------------------------|----------------------|-------------------------------|----------------------|
| <b>Acquisition Time (sec)</b> | 0.6783          | <b>Comment</b>               | Imported from UXMNR. | <b>Date</b>                   | 09 Feb 2021 14:56:30 |
| <b>File Name</b>              |                 | <b>Number of Transients</b>  | 241                  | <b>Frequency (MHz)</b>        | 100.61               |
| <b>Nucleus</b>                | <sup>13</sup> C | <b>Original Points Count</b> | 16384                | <b>Points Count</b>           | 131072               |
| <b>Pulse Sequence</b>         | zgpg30          | <b>Solvent</b>               | CHLOROFORM-D         | <b>Sweep Width (Hz)</b>       | 24154.59             |
|                               |                 |                              |                      | <b>Temperature (degree C)</b> | 27.000               |

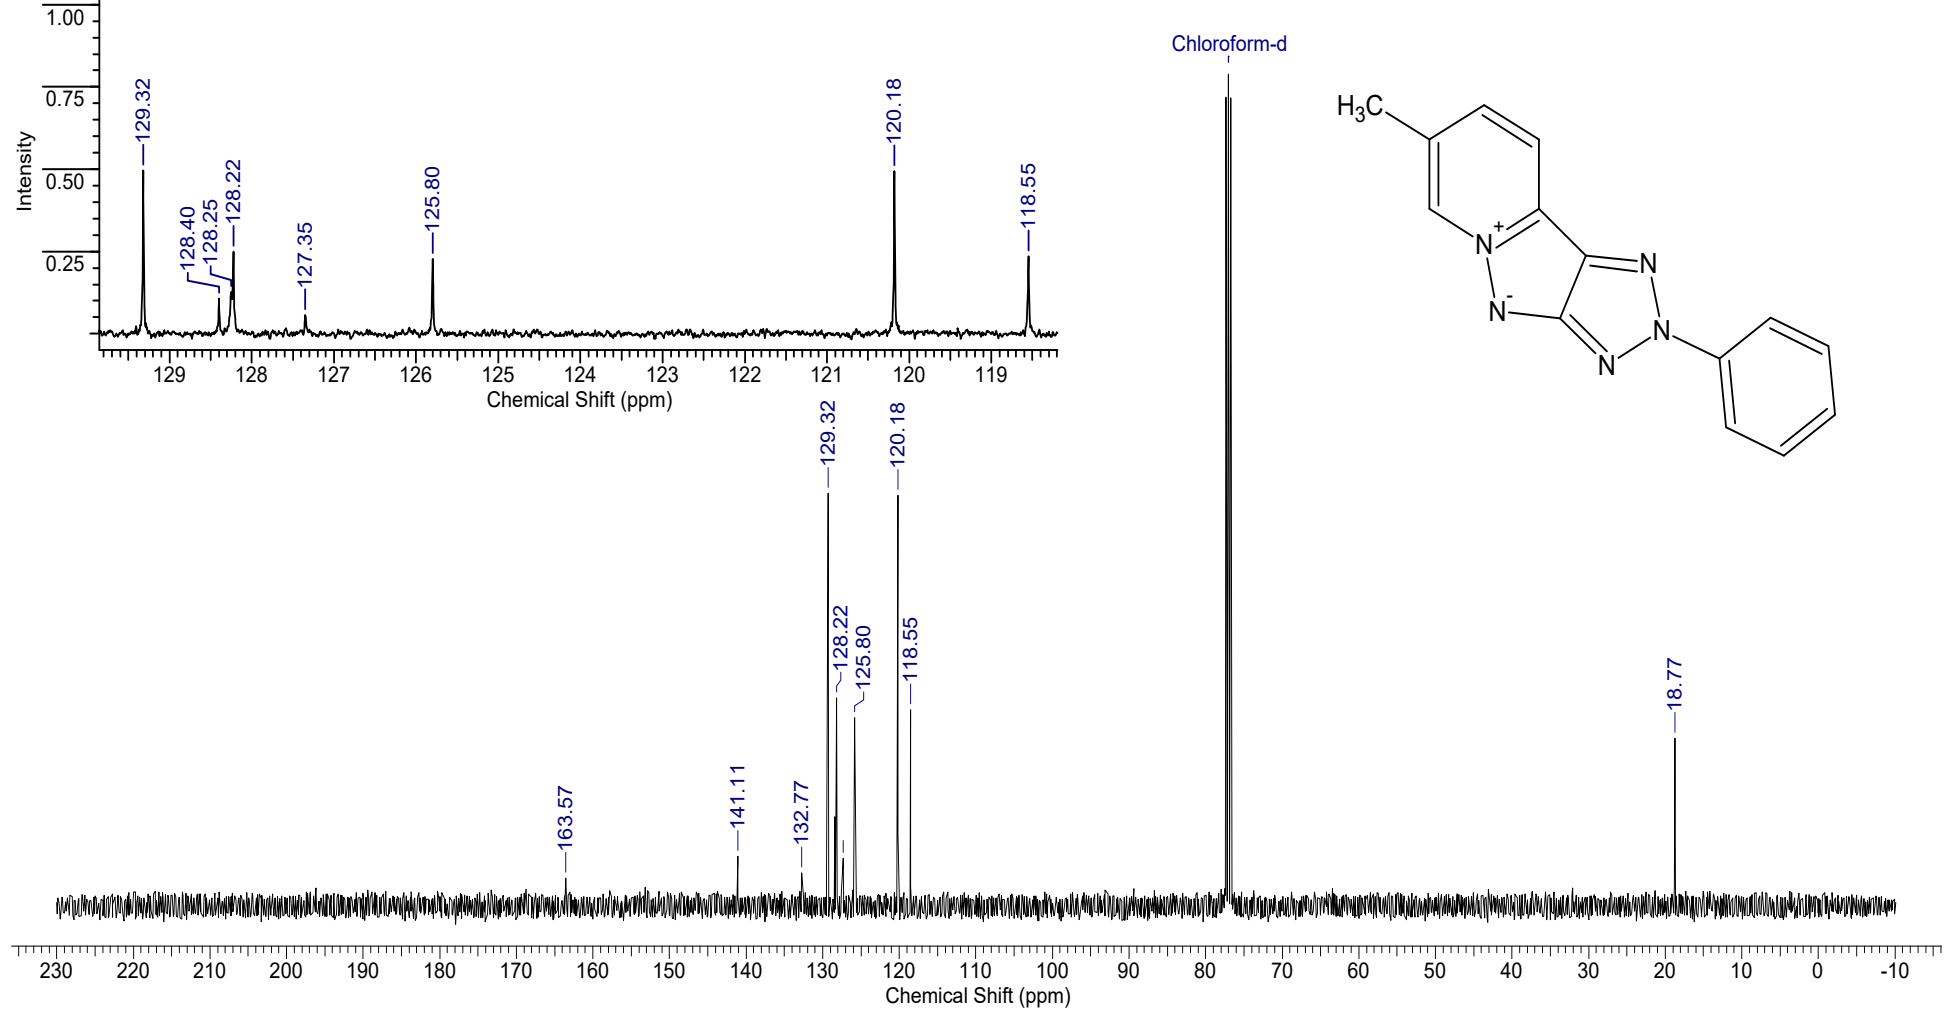

$^{13}\text{C}$  NMR spectrum of **3d** (100.6 MHz,  $\text{CDCl}_3$ )

|                               |                |                               |                      |                              |                         |                      |
|-------------------------------|----------------|-------------------------------|----------------------|------------------------------|-------------------------|----------------------|
| <b>Acquisition Time (sec)</b> | 4.0894         | <b>Comment</b>                | Imported from UXMNR. |                              | <b>Date</b>             | 24 Feb 2021 17:31:40 |
| <b>File Name</b>              |                | <b>Number of Transients</b>   | 4                    | <b>Original Points Count</b> | <b>Frequency (MHz)</b>  | 400.13               |
| <b>Nucleus</b>                | <sup>1</sup> H | <b>Solvent</b>                | CHLOROFORM-D         |                              | <b>Points Count</b>     | 131072               |
| <b>Pulse Sequence</b>         | zg30           | <b>Temperature (degree C)</b> | 27.000               |                              | <b>Sweep Width (Hz)</b> | 8012.82              |

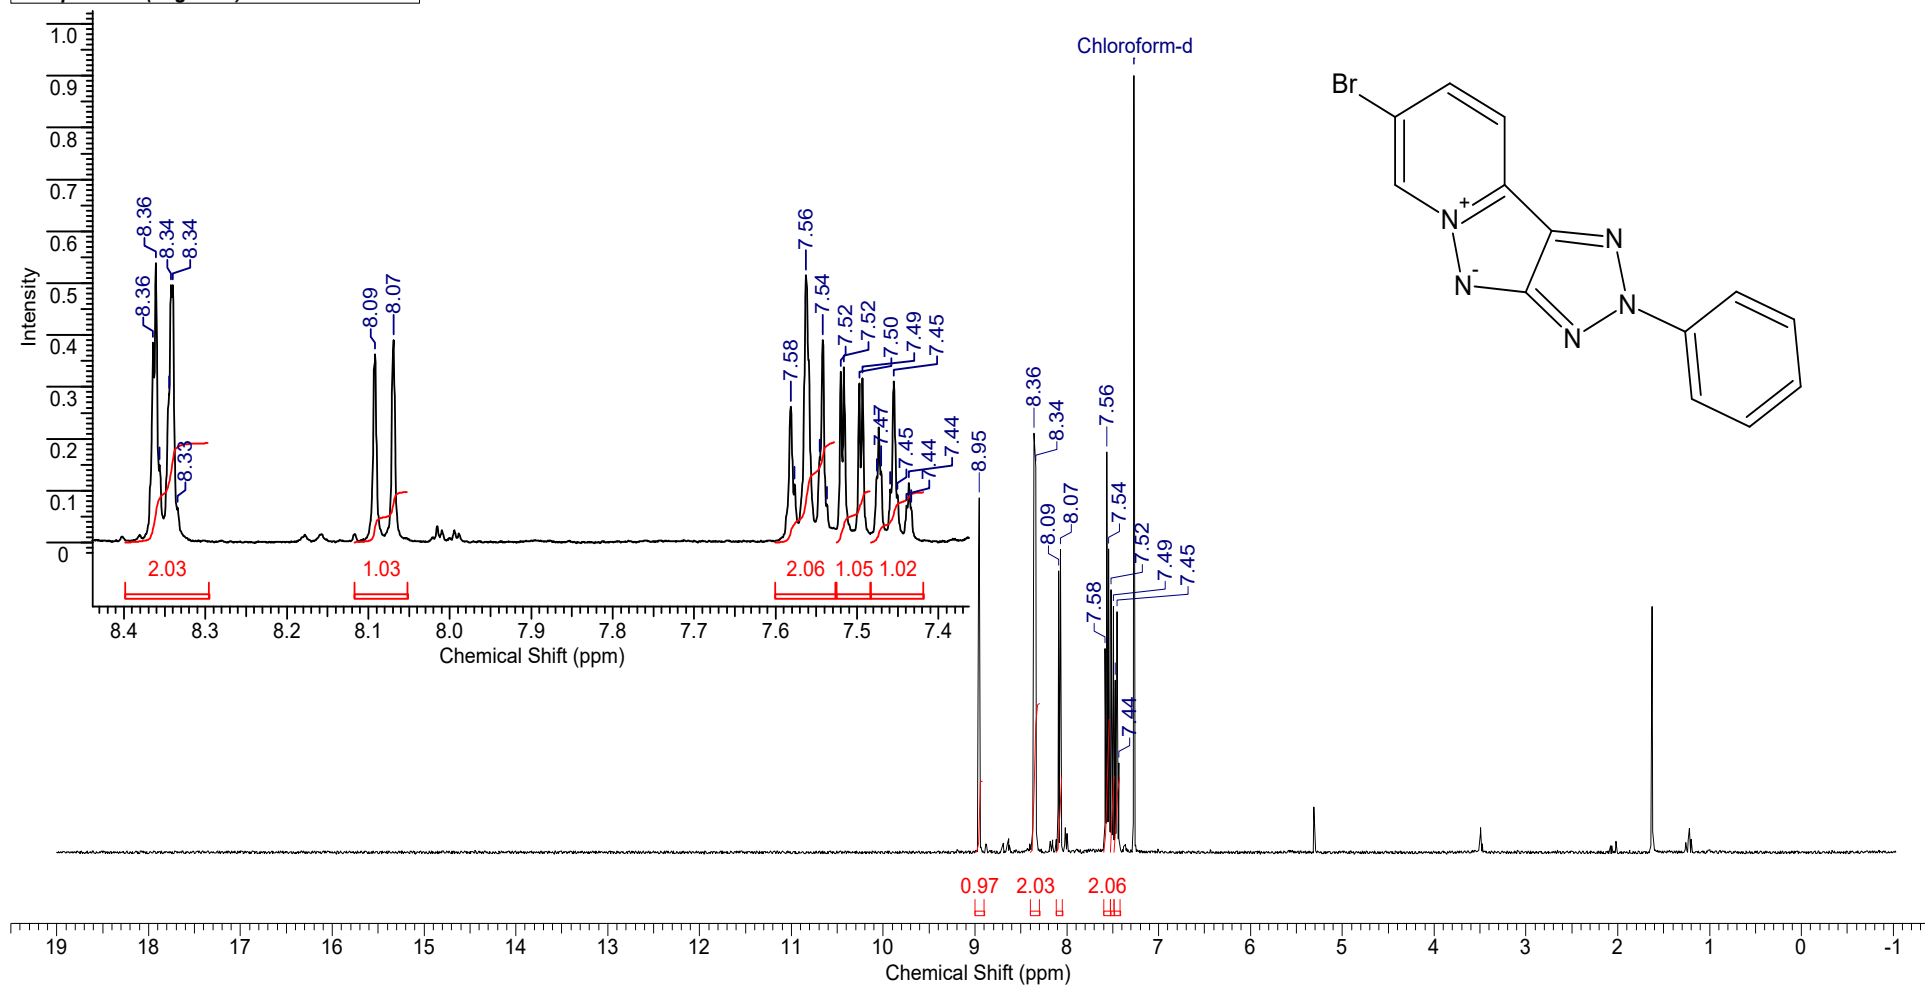

$^1\text{H}$  NMR spectrum of **3e** (400.1 MHz,  $\text{CDCl}_3$ )

|                               |                 |                               |                      |                              |                         |                      |
|-------------------------------|-----------------|-------------------------------|----------------------|------------------------------|-------------------------|----------------------|
| <b>Acquisition Time (sec)</b> | 0.6783          | <b>Comment</b>                | Imported from UXNMR. |                              | <b>Date</b>             | 25 Feb 2021 15:11:22 |
| <b>File Name</b>              |                 | <b>Number of Transients</b>   | 620                  | <b>Original Points Count</b> | <b>Frequency (MHz)</b>  | 100.61               |
| <b>Nucleus</b>                | <sup>13</sup> C | <b>Solvent</b>                | CHLOROFORM-D         |                              | <b>Points Count</b>     | 131072               |
| <b>Pulse Sequence</b>         | zgpg30          | <b>Temperature (degree C)</b> | 27.000               |                              | <b>Sweep Width (Hz)</b> | 24154.59             |

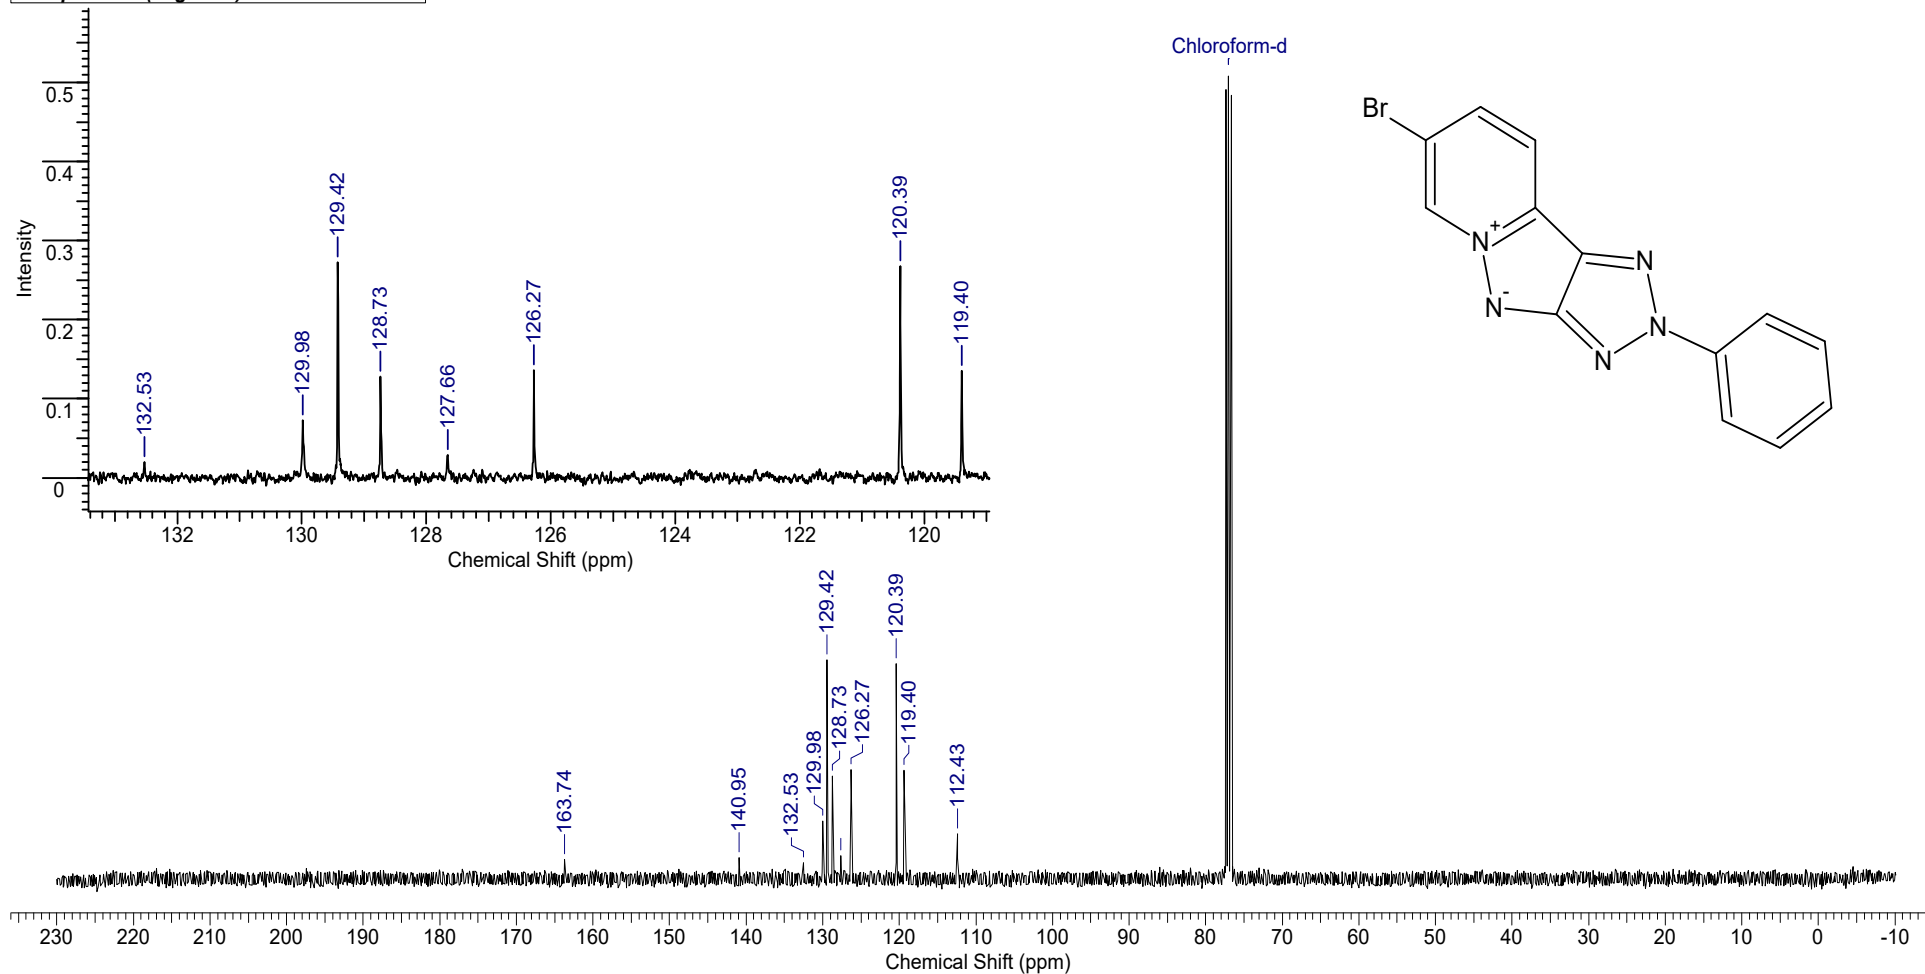



$^{13}\text{C}$  NMR spectrum of **3e** (100.6 MHz,  $\text{CDCl}_3$ )

|                               |                |                             |                      |                              |                               |                      |
|-------------------------------|----------------|-----------------------------|----------------------|------------------------------|-------------------------------|----------------------|
| <b>Acquisition Time (sec)</b> | 4.0894         | <b>Comment</b>              | Imported from UXNMR. |                              | <b>Date</b>                   | 19 Feb 2021 12:54:24 |
| <b>File Name</b>              |                | <b>Number of Transients</b> | 4                    | <b>Original Points Count</b> | <b>Frequency (MHz)</b>        | 400.13               |
| <b>Nucleus</b>                | <sup>1</sup> H | <b>Solvent</b>              | CHLOROFORM-D         | <b>Sweep Width (Hz)</b>      | <b>Points Count</b>           | 32768                |
| <b>Pulse Sequence</b>         | zg30           |                             |                      |                              | <b>Temperature (degree C)</b> | 27.000               |

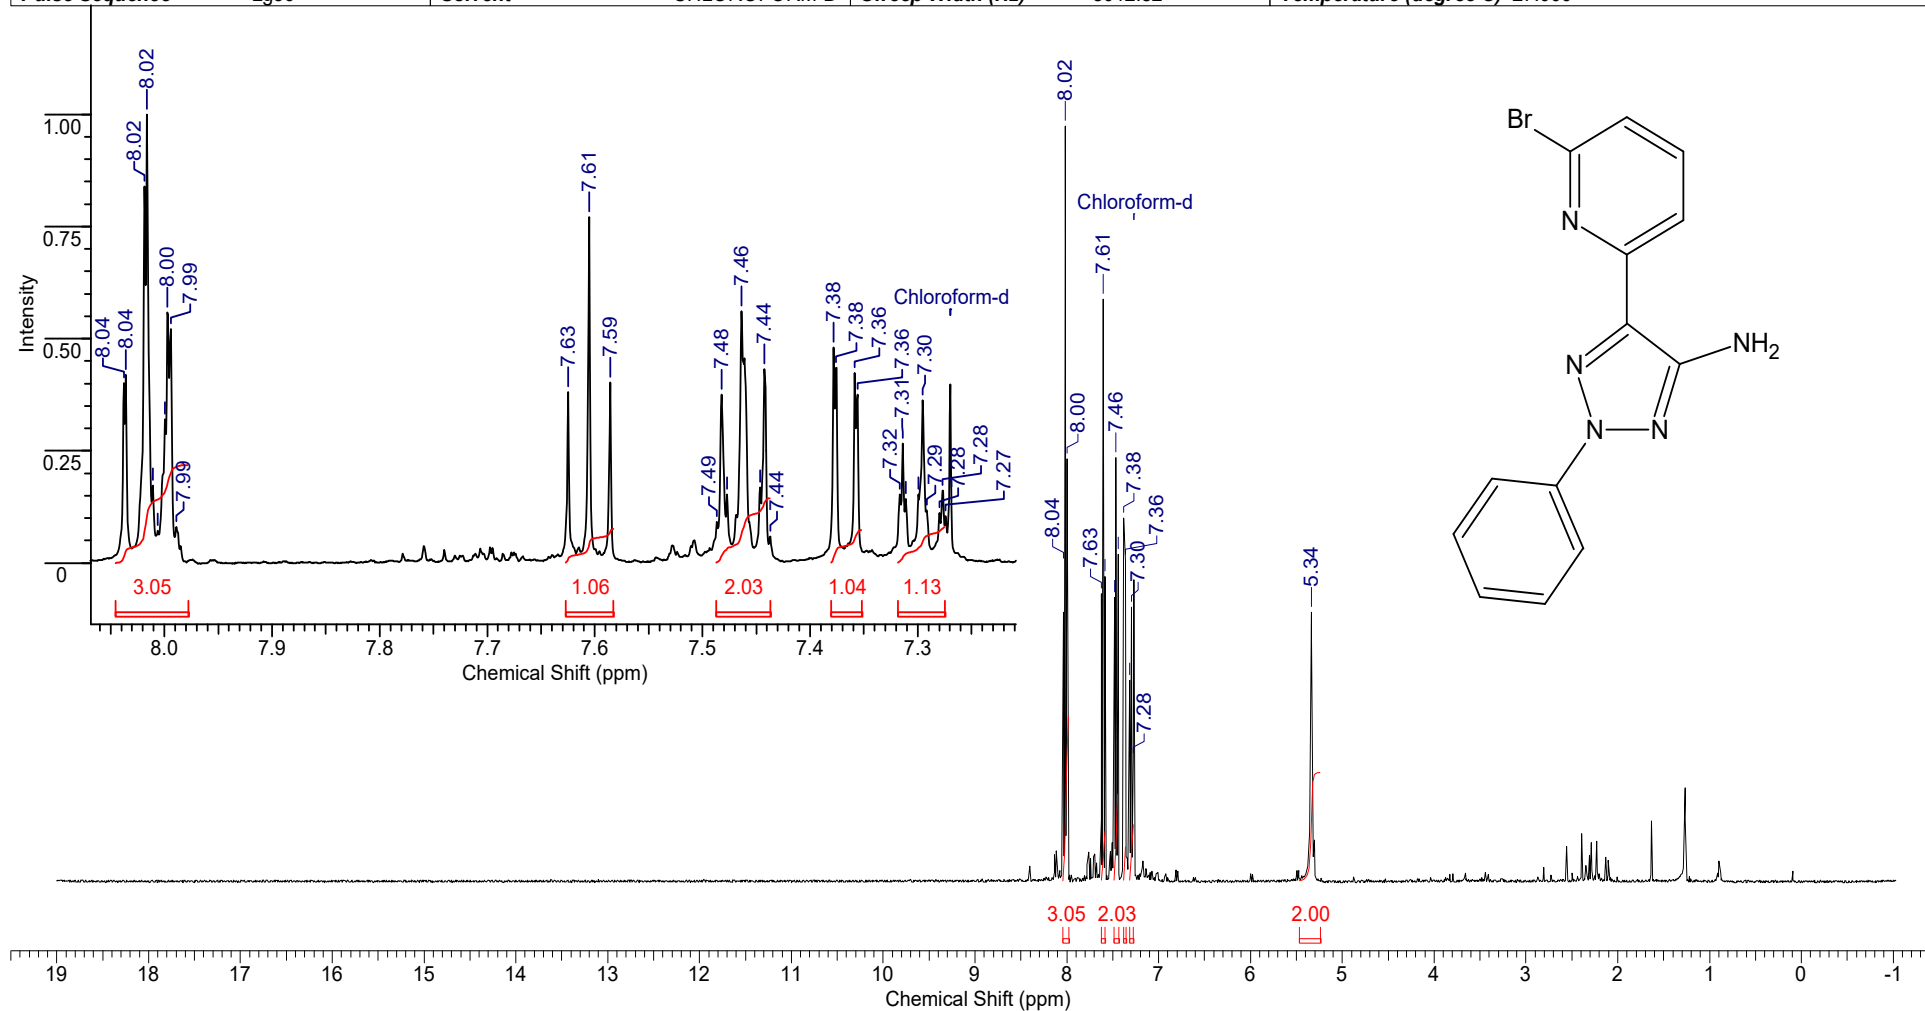

$^1\text{H}$  NMR spectrum of **3f** (400.1 MHz,  $\text{CDCl}_3$ )

|                               |                 |                             |                      |                              |                               |                      |
|-------------------------------|-----------------|-----------------------------|----------------------|------------------------------|-------------------------------|----------------------|
| <b>Acquisition Time (sec)</b> | 0.6783          | <b>Comment</b>              | Imported from UXNMR. |                              | <b>Date</b>                   | 25 Feb 2021 12:34:46 |
| <b>File Name</b>              |                 | <b>Number of Transients</b> | 193                  | <b>Original Points Count</b> | <b>Frequency (MHz)</b>        | 100.61               |
| <b>Nucleus</b>                | <sup>13</sup> C | <b>Solvent</b>              | CHLOROFORM-D         | <b>Sweep Width (Hz)</b>      | <b>Points Count</b>           | 131072               |
| <b>Pulse Sequence</b>         | zgpg30          |                             |                      |                              | <b>Temperature (degree C)</b> | 27.000               |

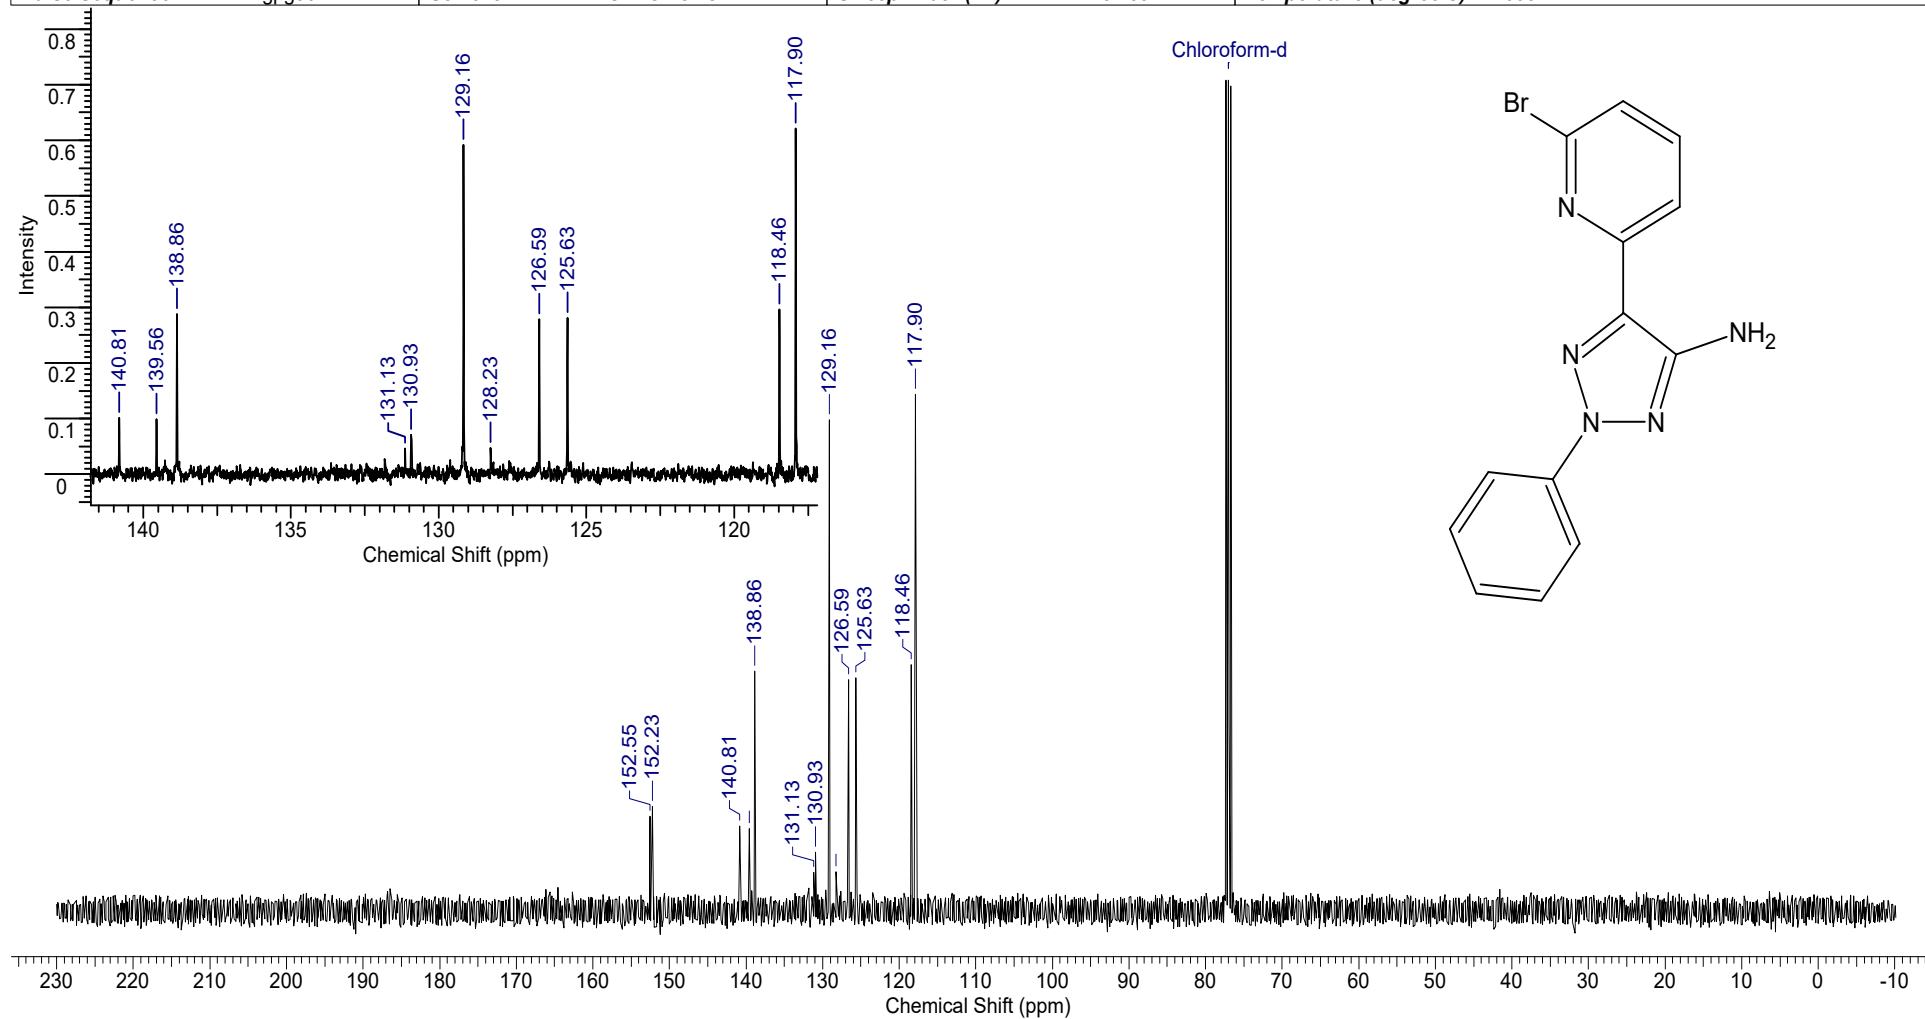

$^{13}\text{C}$  NMR spectrum of **3f** (100.6 MHz,  $\text{CDCl}_3$ )

|                               |                |                             |                      |                              |                         |                      |
|-------------------------------|----------------|-----------------------------|----------------------|------------------------------|-------------------------|----------------------|
| <b>Acquisition Time (sec)</b> | 4.0894         | <b>Comment</b>              | Imported from UXNMR. |                              | <b>Date</b>             | 28 Oct 2020 17:12:48 |
| <b>File Name</b>              |                | <b>Number of Transients</b> | 4                    | <b>Original Points Count</b> | <b>Frequency (MHz)</b>  | 400.13               |
| <b>Nucleus</b>                | <sup>1</sup> H | <b>Solvent</b>              | CHLOROFORM-D         |                              | <b>Points Count</b>     | 131072               |
| <b>Pulse Sequence</b>         | zg30           |                             |                      |                              | <b>Sweep Width (Hz)</b> | 8012.82              |
| <b>Temperature (degree C)</b> | 27.000         |                             |                      |                              |                         |                      |

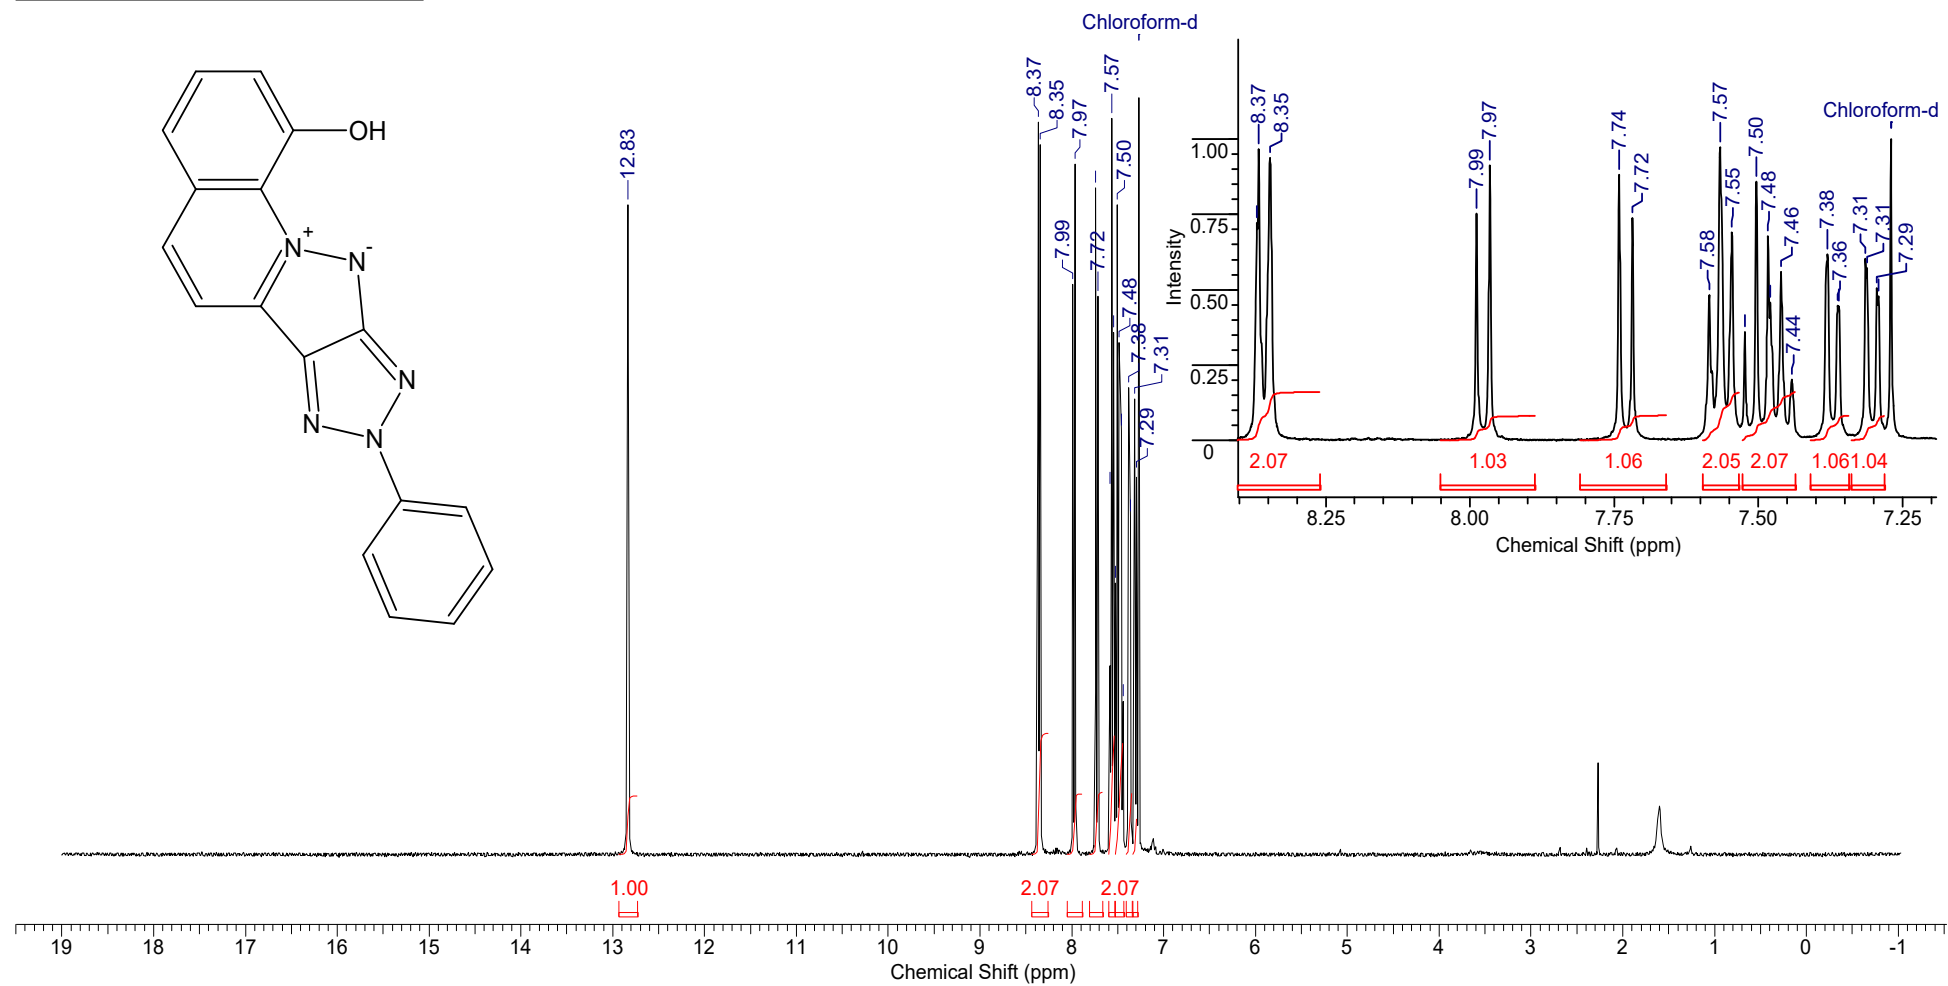

$^1\text{H}$  NMR spectrum of **3g** (400.1 MHz,  $\text{CDCl}_3$ )

|                                      |                                     |                                    |
|--------------------------------------|-------------------------------------|------------------------------------|
| <b>Acquisition Time (sec)</b> 0.6783 | <b>Comment</b> Imported from UXNMR. | <b>Date</b> 27 Oct 2020 14:54:42   |
| <b>File Name</b>                     |                                     | <b>Frequency (MHz)</b> 100.61      |
| <b>Nucleus</b> 13C                   | <b>Number of Transients</b> 329     | <b>Original Points Count</b> 16384 |
| <b>Pulse Sequence</b> zgpg30         | <b>Solvent</b> CHLOROFORM-D         | <b>Points Count</b> 131072         |
| <b>Temperature (degree C)</b> 27.000 |                                     | <b>Sweep Width (Hz)</b> 24154.59   |

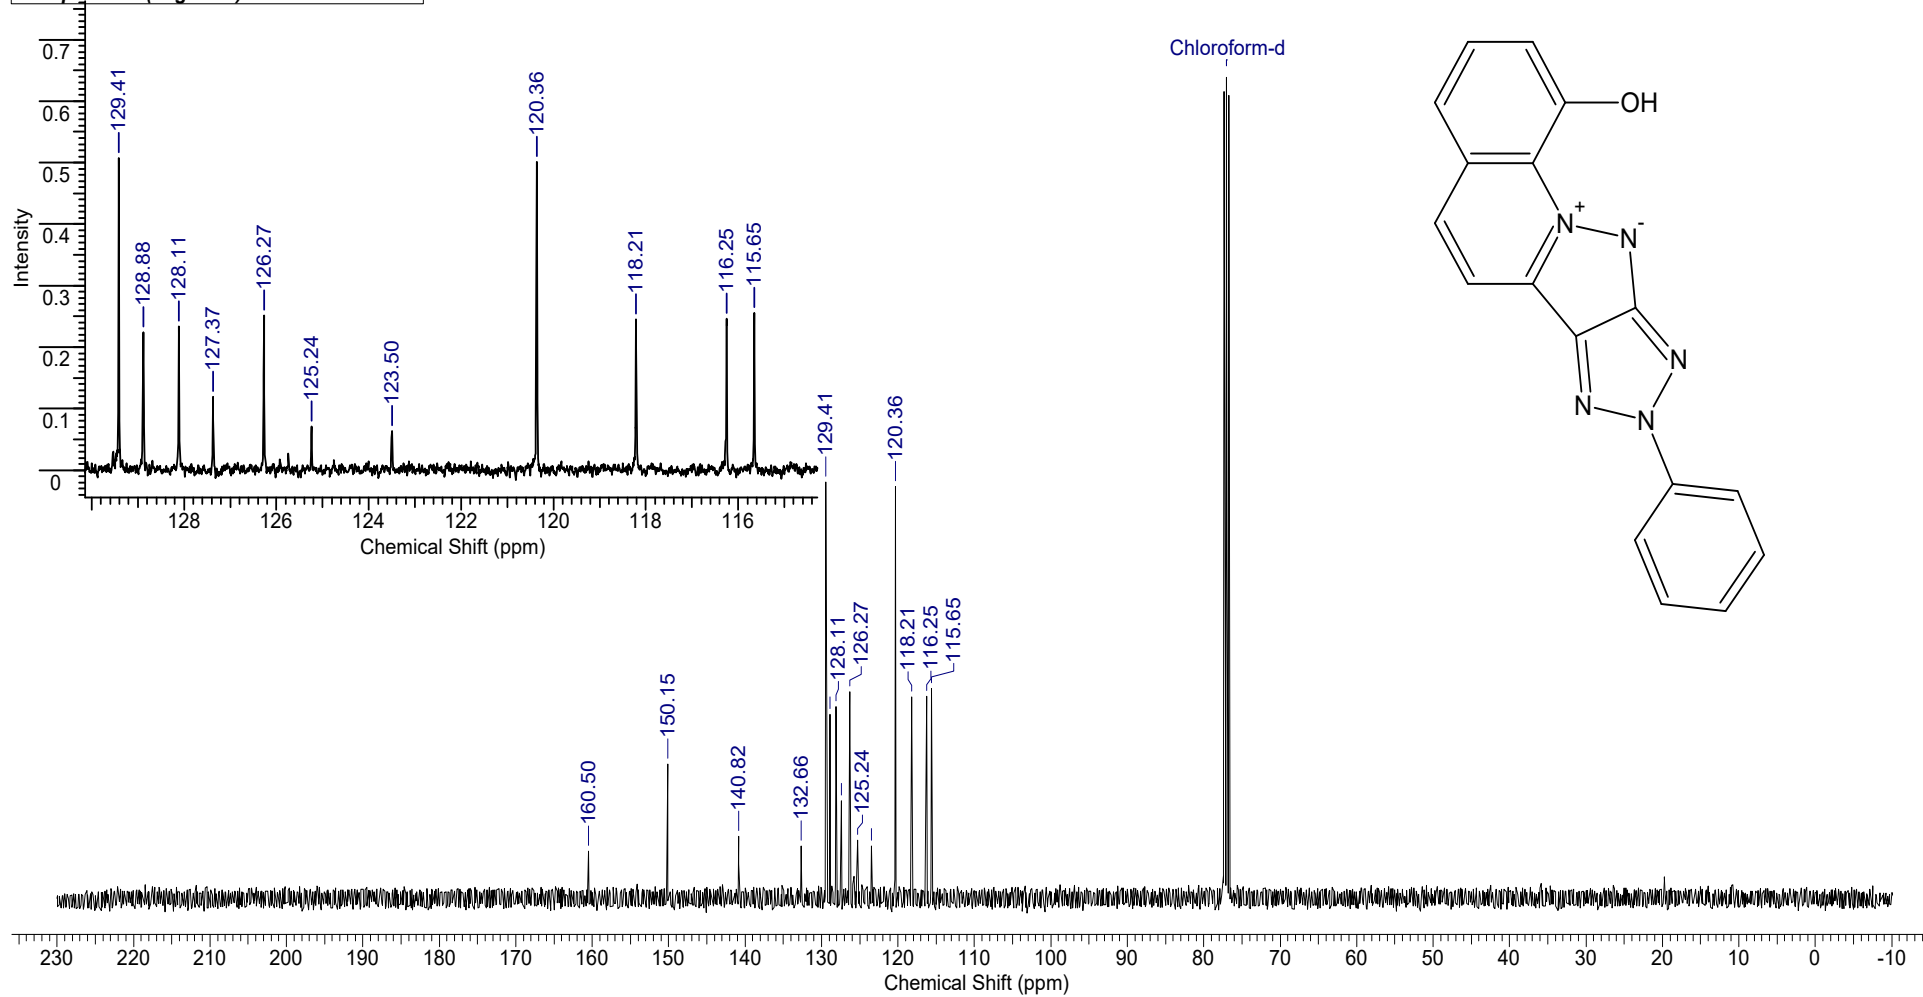



$^{13}\text{C}$  NMR spectrum of **3g** (100.6 MHz,  $\text{CDCl}_3$ )

|                               |        |                               |                      |                              |                      |
|-------------------------------|--------|-------------------------------|----------------------|------------------------------|----------------------|
| <b>Acquisition Time (sec)</b> | 4.0894 | <b>Comment</b>                | Imported from UXNMR. | <b>Date</b>                  | 30 Oct 2020 15:25:44 |
| <b>File Name</b>              |        | <b>Number of Transients</b>   | 4                    | <b>Original Points Count</b> | 32768                |
| <b>Nucleus</b>                | 1H     | <b>Solvent</b>                | CHLOROFORM-D         | <b>Points Count</b>          | 131072               |
| <b>Pulse Sequence</b>         | zg30   | <b>Temperature (degree C)</b> | 27.000               | <b>Sweep Width (Hz)</b>      | 8012.82              |

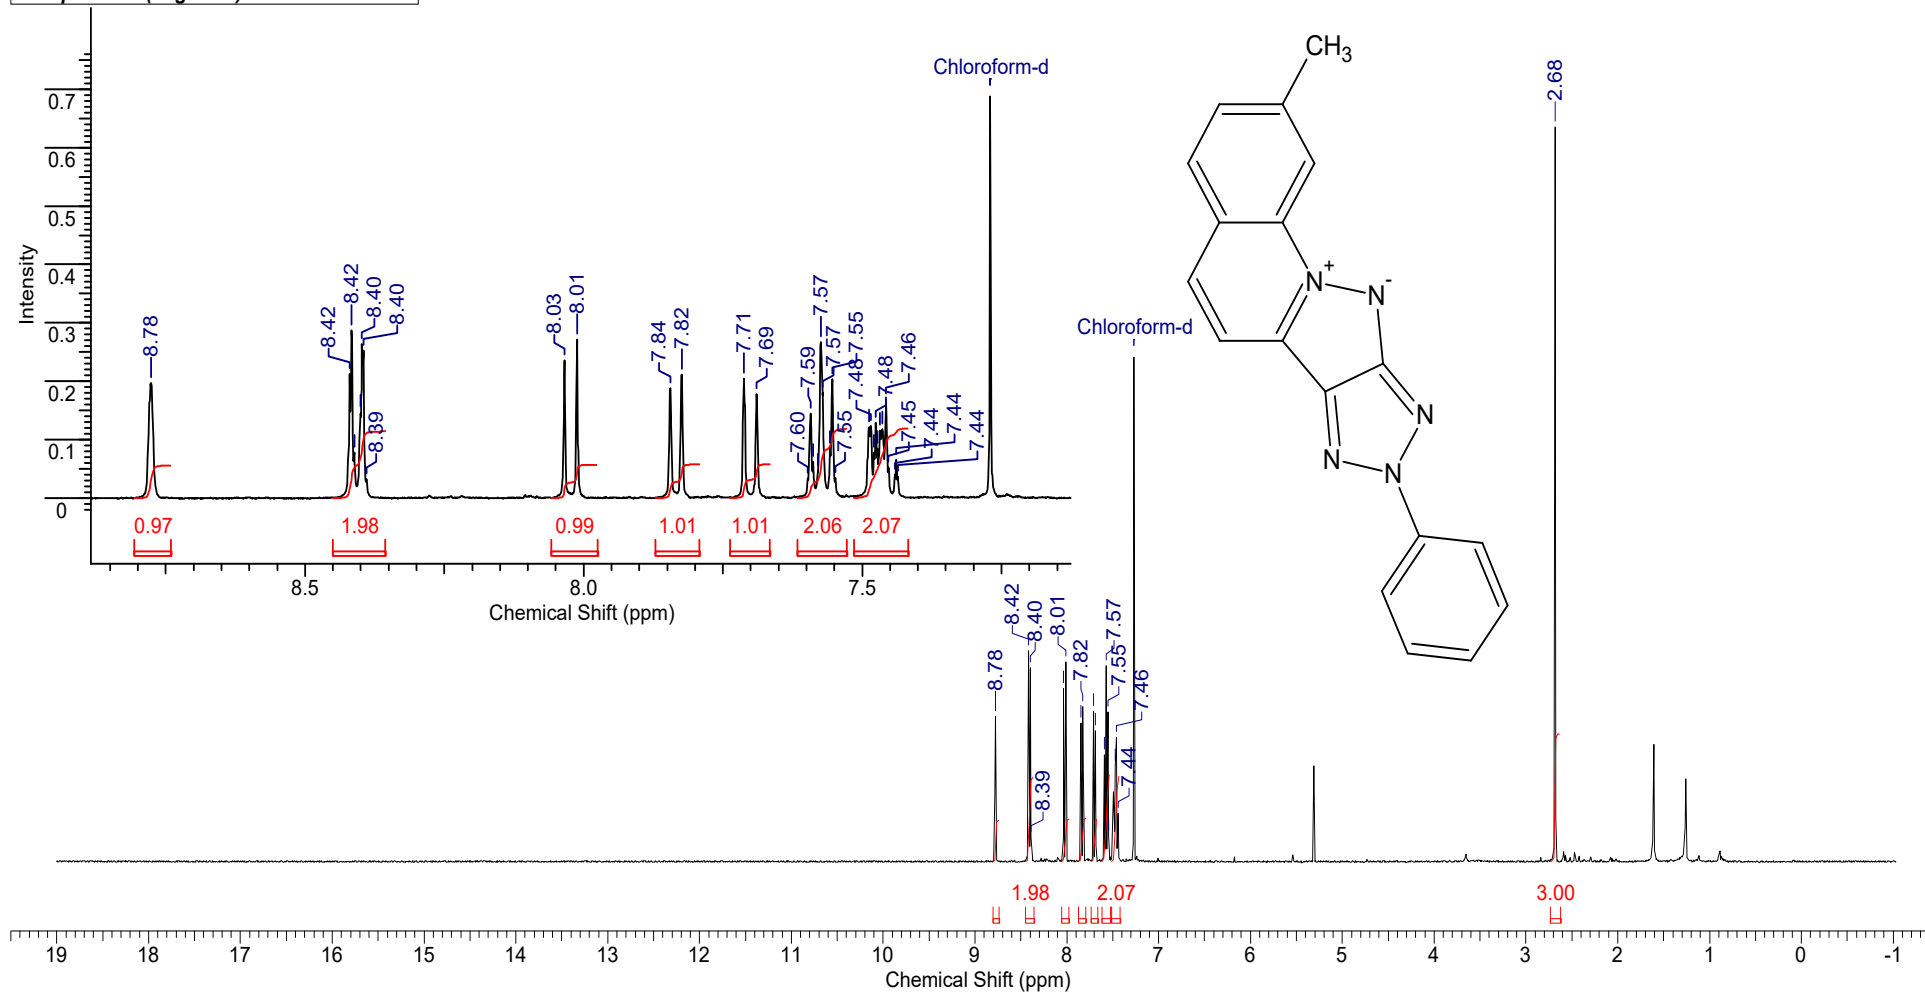

$^1\text{H}$  NMR spectrum of **3h** (400.1 MHz,  $\text{CDCl}_3$ )

|                               |        |                               |                      |                              |                         |                        |        |
|-------------------------------|--------|-------------------------------|----------------------|------------------------------|-------------------------|------------------------|--------|
| <b>Acquisition Time (sec)</b> | 0.6783 | <b>Comment</b>                | Imported from UXNMR. |                              | <b>Date</b>             | 27 Oct 2020 16:03:48   |        |
| <b>File Name</b>              |        | <b>Number of Transients</b>   | 1665                 | <b>Original Points Count</b> | 16384                   | <b>Frequency (MHz)</b> | 100.61 |
| <b>Nucleus</b>                | 13C    | <b>Solvent</b>                | CHLOROFORM-D         |                              | <b>Points Count</b>     | 131072                 |        |
| <b>Pulse Sequence</b>         | zgpg30 | <b>Temperature (degree C)</b> | 27.000               |                              | <b>Sweep Width (Hz)</b> | 24154.59               |        |

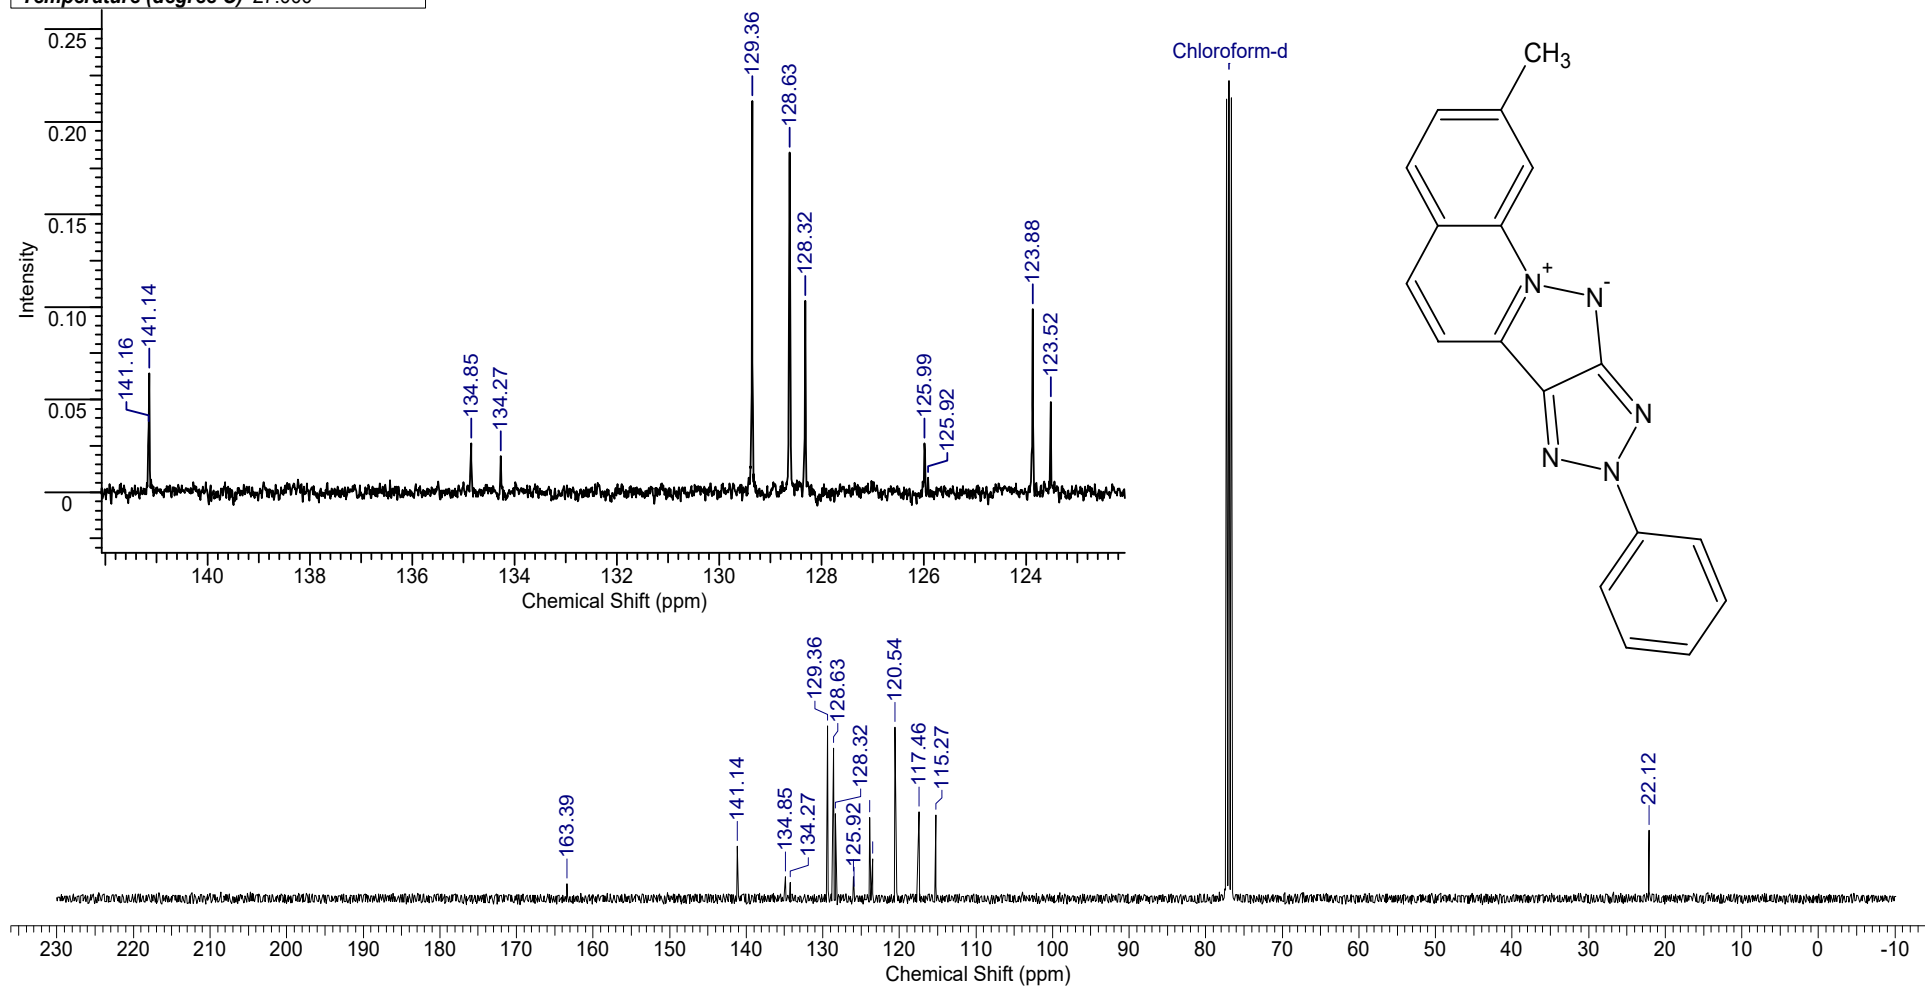

$^{13}\text{C}$  NMR spectrum of **3h** (100.6 MHz,  $\text{CDCl}_3$ )

|                               |        |                             |                      |                              |                         |                      |        |
|-------------------------------|--------|-----------------------------|----------------------|------------------------------|-------------------------|----------------------|--------|
| <b>Acquisition Time (sec)</b> | 4.0894 | <b>Comment</b>              | Imported from UXNMR. |                              | <b>Date</b>             | 18 Feb 2021 13:05:08 |        |
| <b>File Name</b>              |        |                             |                      |                              | <b>Frequency (MHz)</b>  | 400.13               |        |
| <b>Nucleus</b>                | 1H     | <b>Number of Transients</b> | 4                    | <b>Original Points Count</b> | 32768                   | <b>Points Count</b>  | 131072 |
| <b>Pulse Sequence</b>         | zg30   | <b>Solvent</b>              | CHLOROFORM-D         |                              | <b>Sweep Width (Hz)</b> | 8012.82              |        |
| <b>Temperature (degree C)</b> | 27.000 |                             |                      |                              |                         |                      |        |

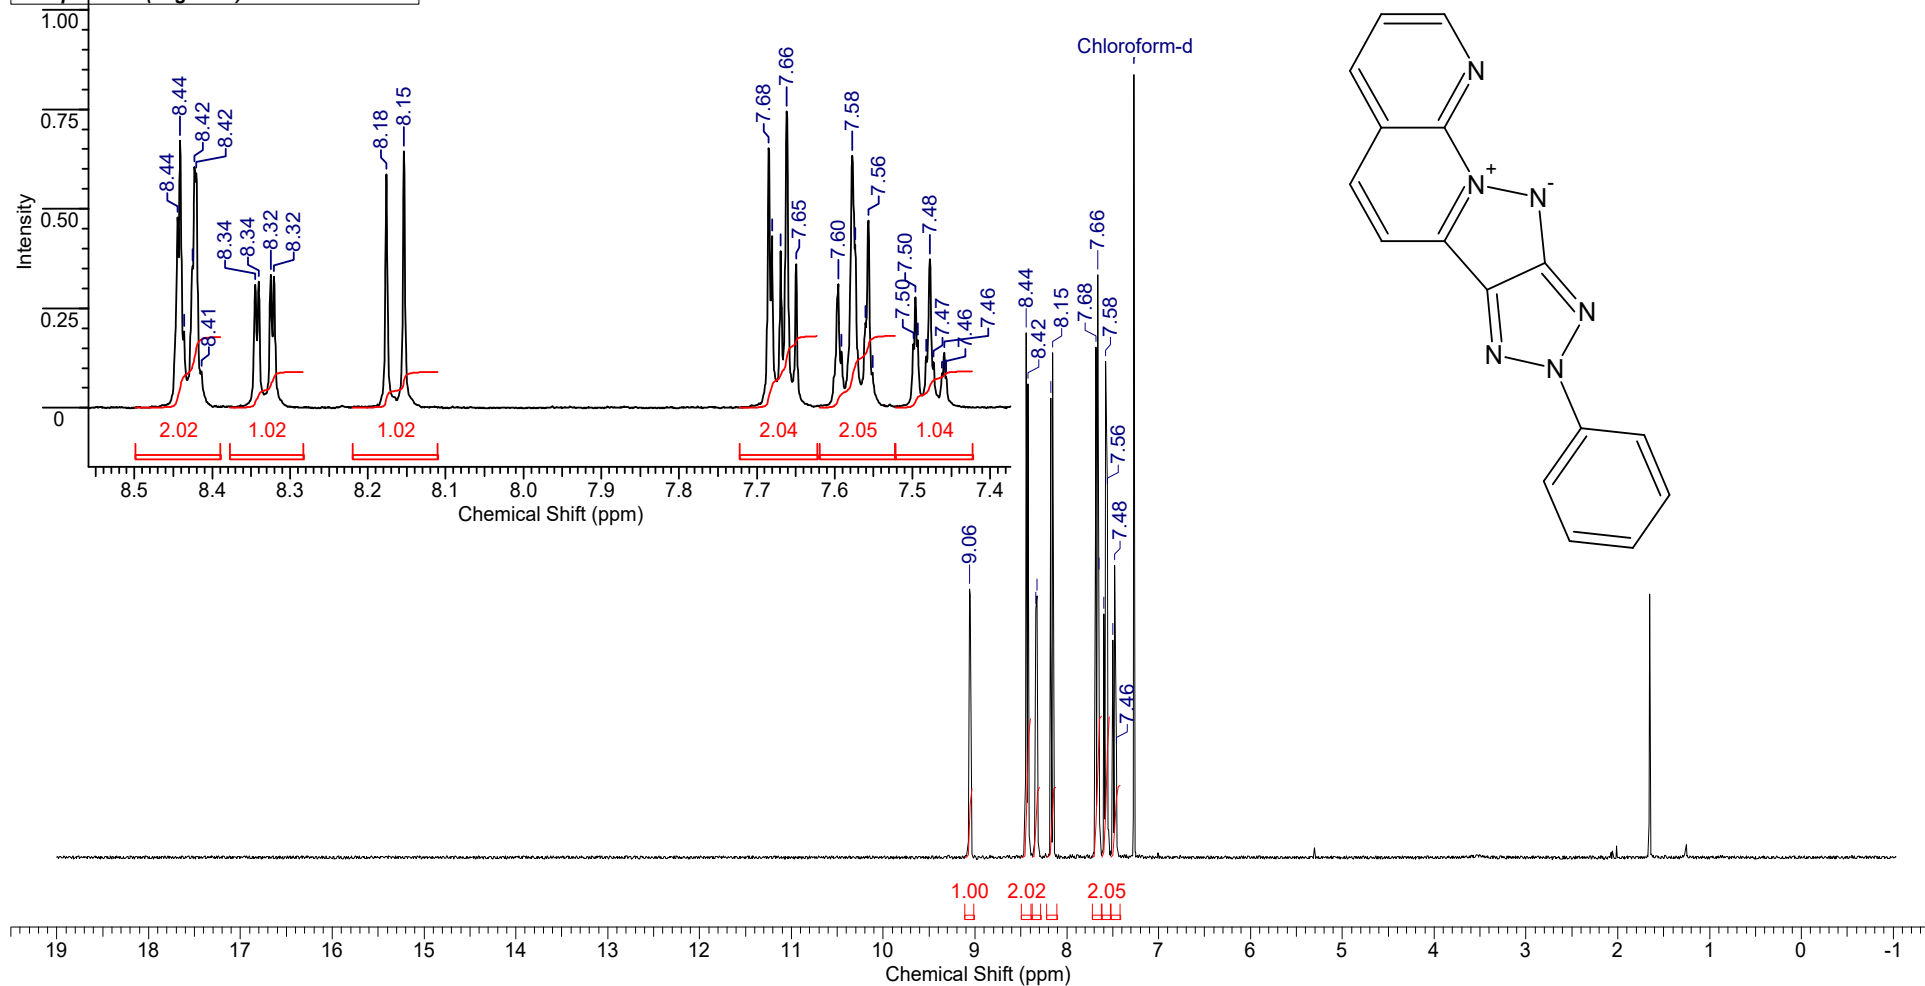

$^1\text{H}$  NMR spectrum of **3i** (400.1 MHz,  $\text{CDCl}_3$ )

|                               |                 |                             |                      |                              |             |                               |        |
|-------------------------------|-----------------|-----------------------------|----------------------|------------------------------|-------------|-------------------------------|--------|
| <b>Acquisition Time (sec)</b> | 0.6783          | <b>Comment</b>              | Imported from UXNMR. |                              | <b>Date</b> | 18 Feb 2021 13:30:14          |        |
| <b>File Name</b>              |                 | <b>Number of Transients</b> | 574                  | <b>Original Points Count</b> | 16384       | <b>Frequency (MHz)</b>        | 100.61 |
| <b>Nucleus</b>                | <sup>13</sup> C | <b>Solvent</b>              | CHLOROFORM-D         | <b>Sweep Width (Hz)</b>      | 24154.59    | <b>Points Count</b>           | 131072 |
| <b>Pulse Sequence</b>         | zgpg30          |                             |                      |                              |             | <b>Temperature (degree C)</b> | 27.000 |

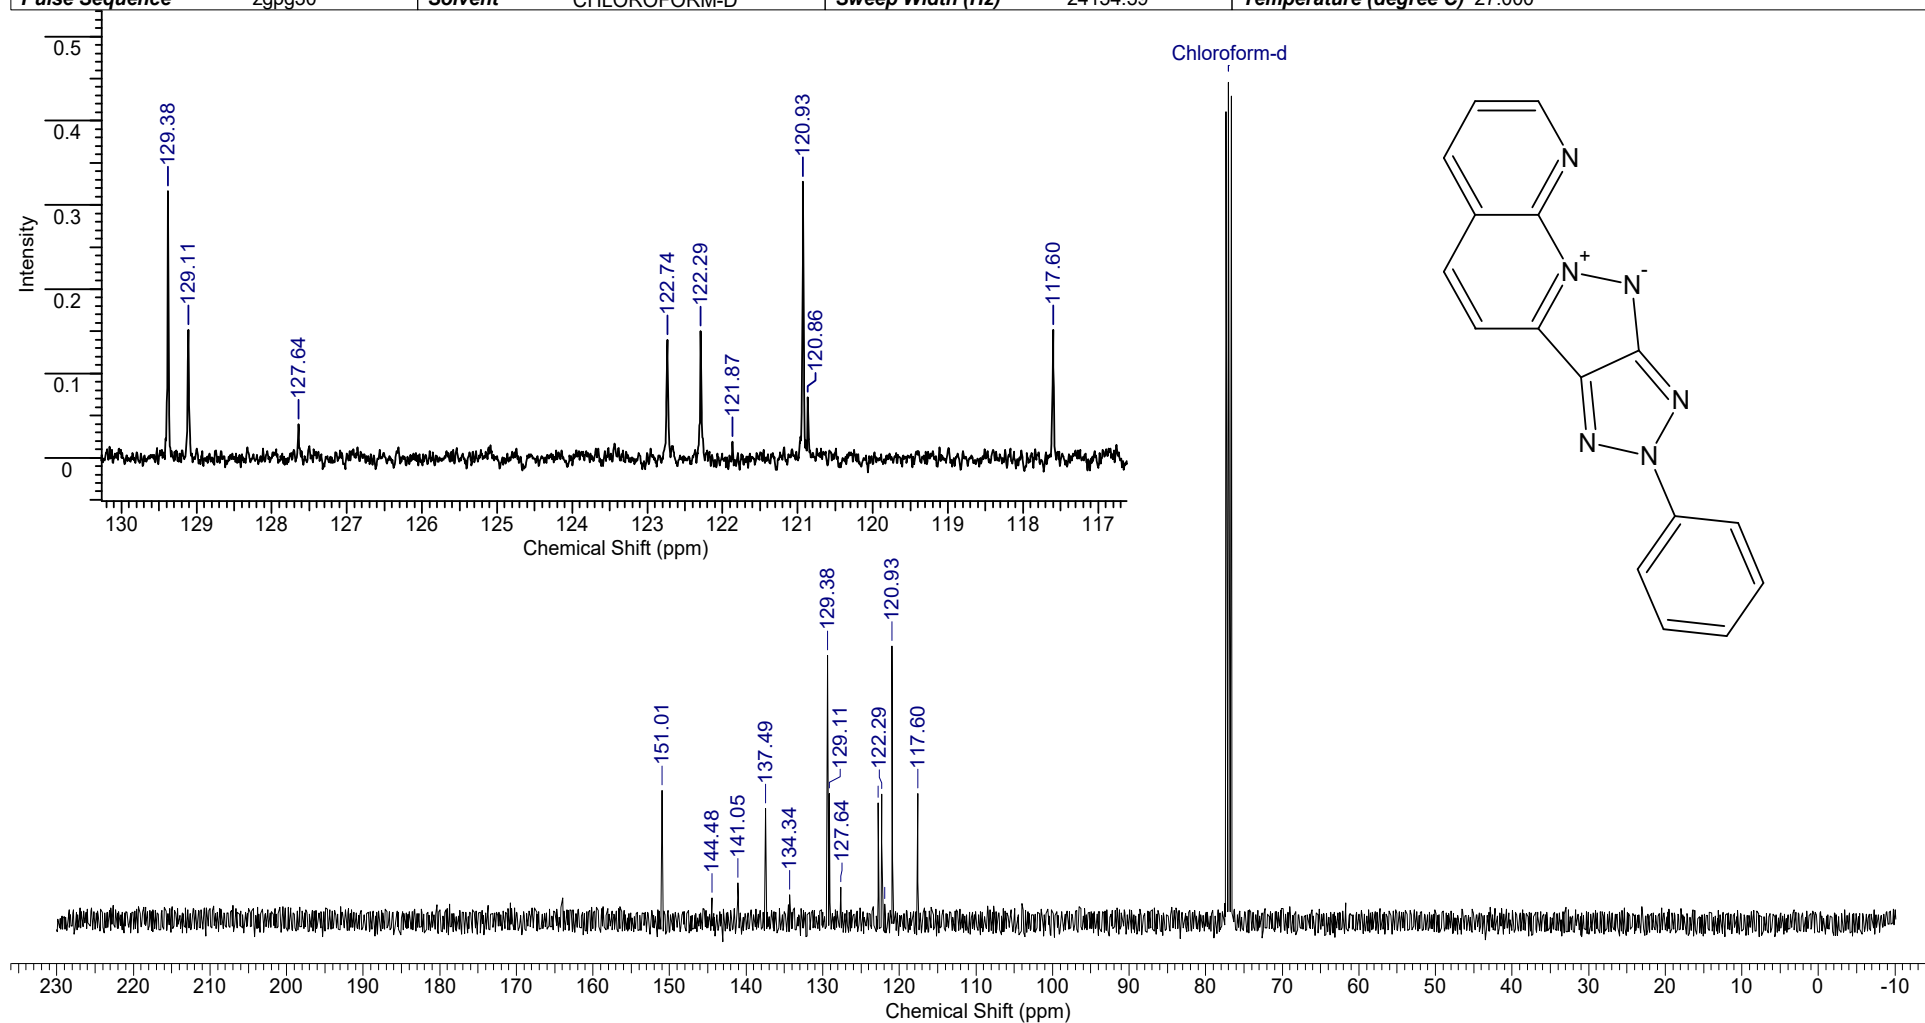



$^{13}\text{C}$  NMR spectrum of **3i** (100.6 MHz,  $\text{CDCl}_3$ )

|                               |        |                             |                      |                              |                         |                      |        |
|-------------------------------|--------|-----------------------------|----------------------|------------------------------|-------------------------|----------------------|--------|
| <b>Acquisition Time (sec)</b> | 4.0894 | <b>Comment</b>              | Imported from UXMNR. |                              | <b>Date</b>             | 13 Nov 2020 14:54:42 |        |
| <b>File Name</b>              |        |                             |                      |                              | <b>Frequency (MHz)</b>  | 400.13               |        |
| <b>Nucleus</b>                | 1H     | <b>Number of Transients</b> | 4                    | <b>Original Points Count</b> | 32768                   | <b>Points Count</b>  | 131072 |
| <b>Pulse Sequence</b>         | zg30   | <b>Solvent</b>              | CHLOROFORM-D         |                              | <b>Sweep Width (Hz)</b> | 8012.82              |        |
| <b>Temperature (degree C)</b> | 27.000 |                             |                      |                              |                         |                      |        |

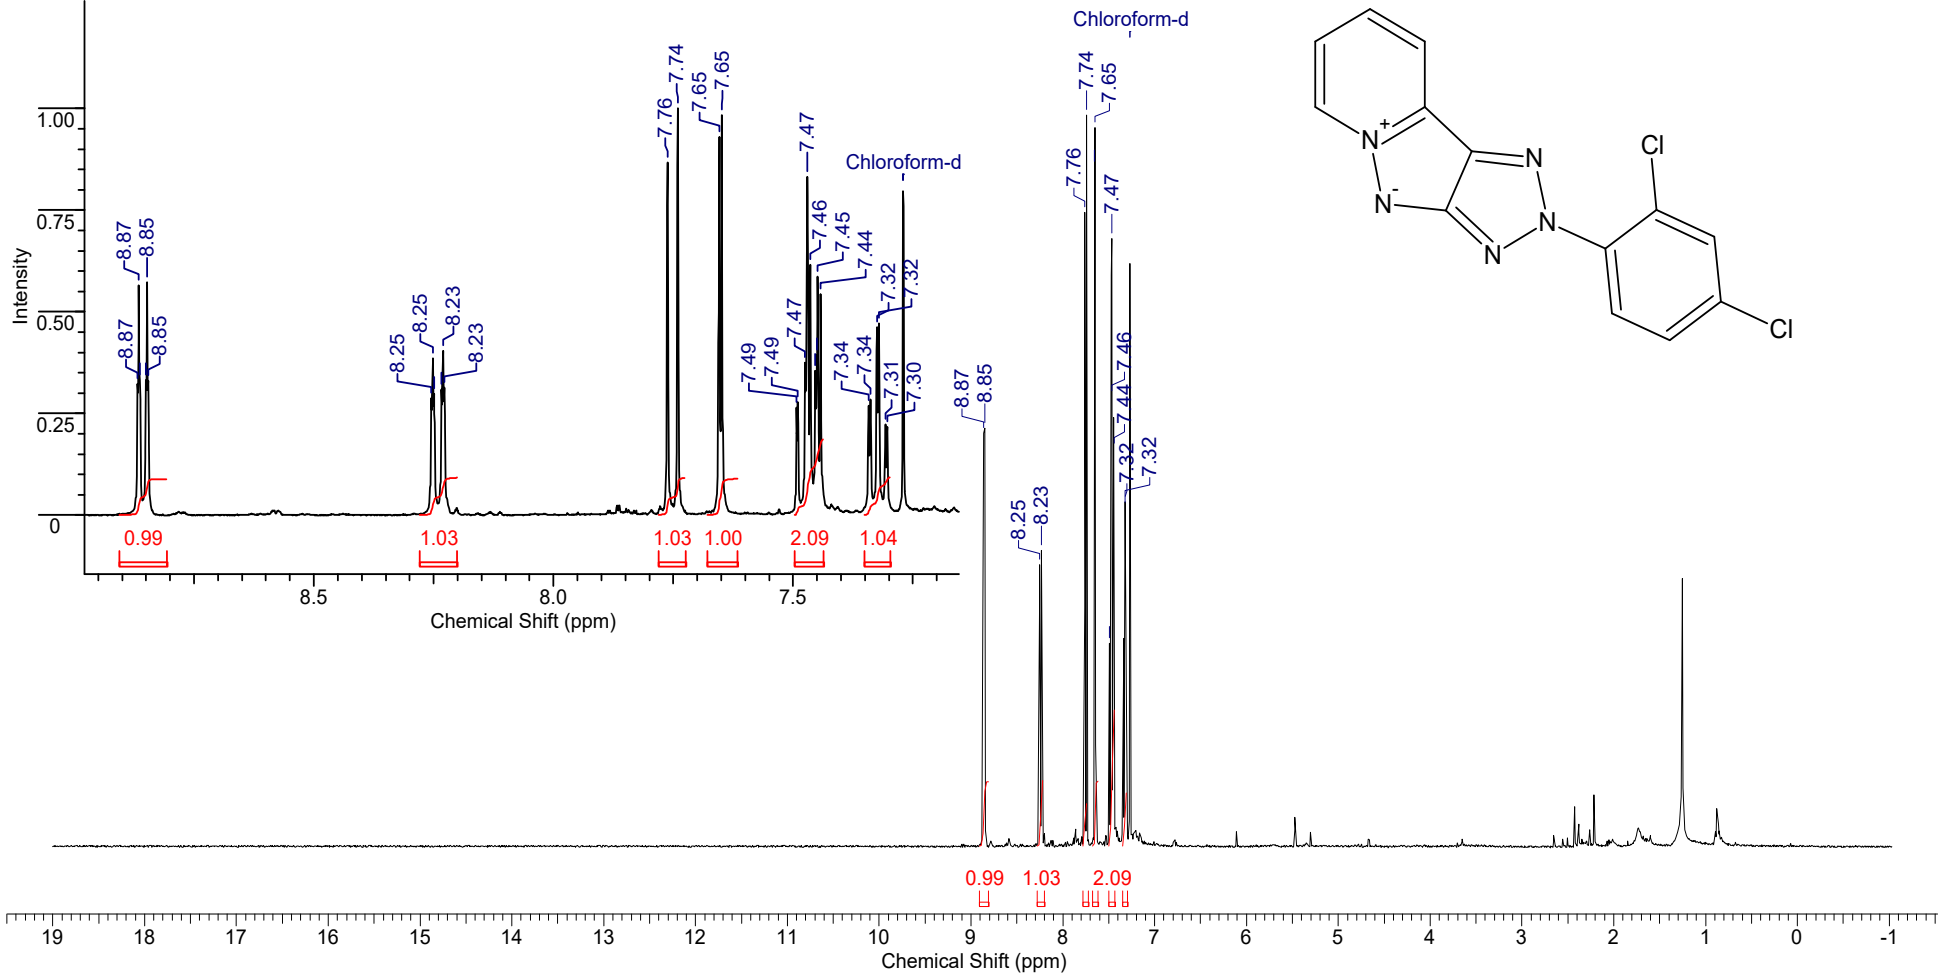

$^1\text{H}$  NMR spectrum of **3j** (400.1 MHz,  $\text{CDCl}_3$ )

|                               |        |                             |                      |                               |                      |
|-------------------------------|--------|-----------------------------|----------------------|-------------------------------|----------------------|
| <b>Acquisition Time (sec)</b> | 0.6783 | <b>Comment</b>              | Imported from UXNMR. | <b>Date</b>                   | 13 Nov 2020 15:05:20 |
| <b>File Name</b>              |        |                             |                      | <b>Frequency (MHz)</b>        | 100.61               |
| <b>Nucleus</b>                | 13C    | <b>Number of Transients</b> | 241                  | <b>Original Points Count</b>  | 16384                |
| <b>Pulse Sequence</b>         | zgpg30 | <b>Solvent</b>              | CHLOROFORM-D         | <b>Sweep Width (Hz)</b>       | 24154.59             |
|                               |        |                             |                      | <b>Temperature (degree C)</b> | 27.000               |

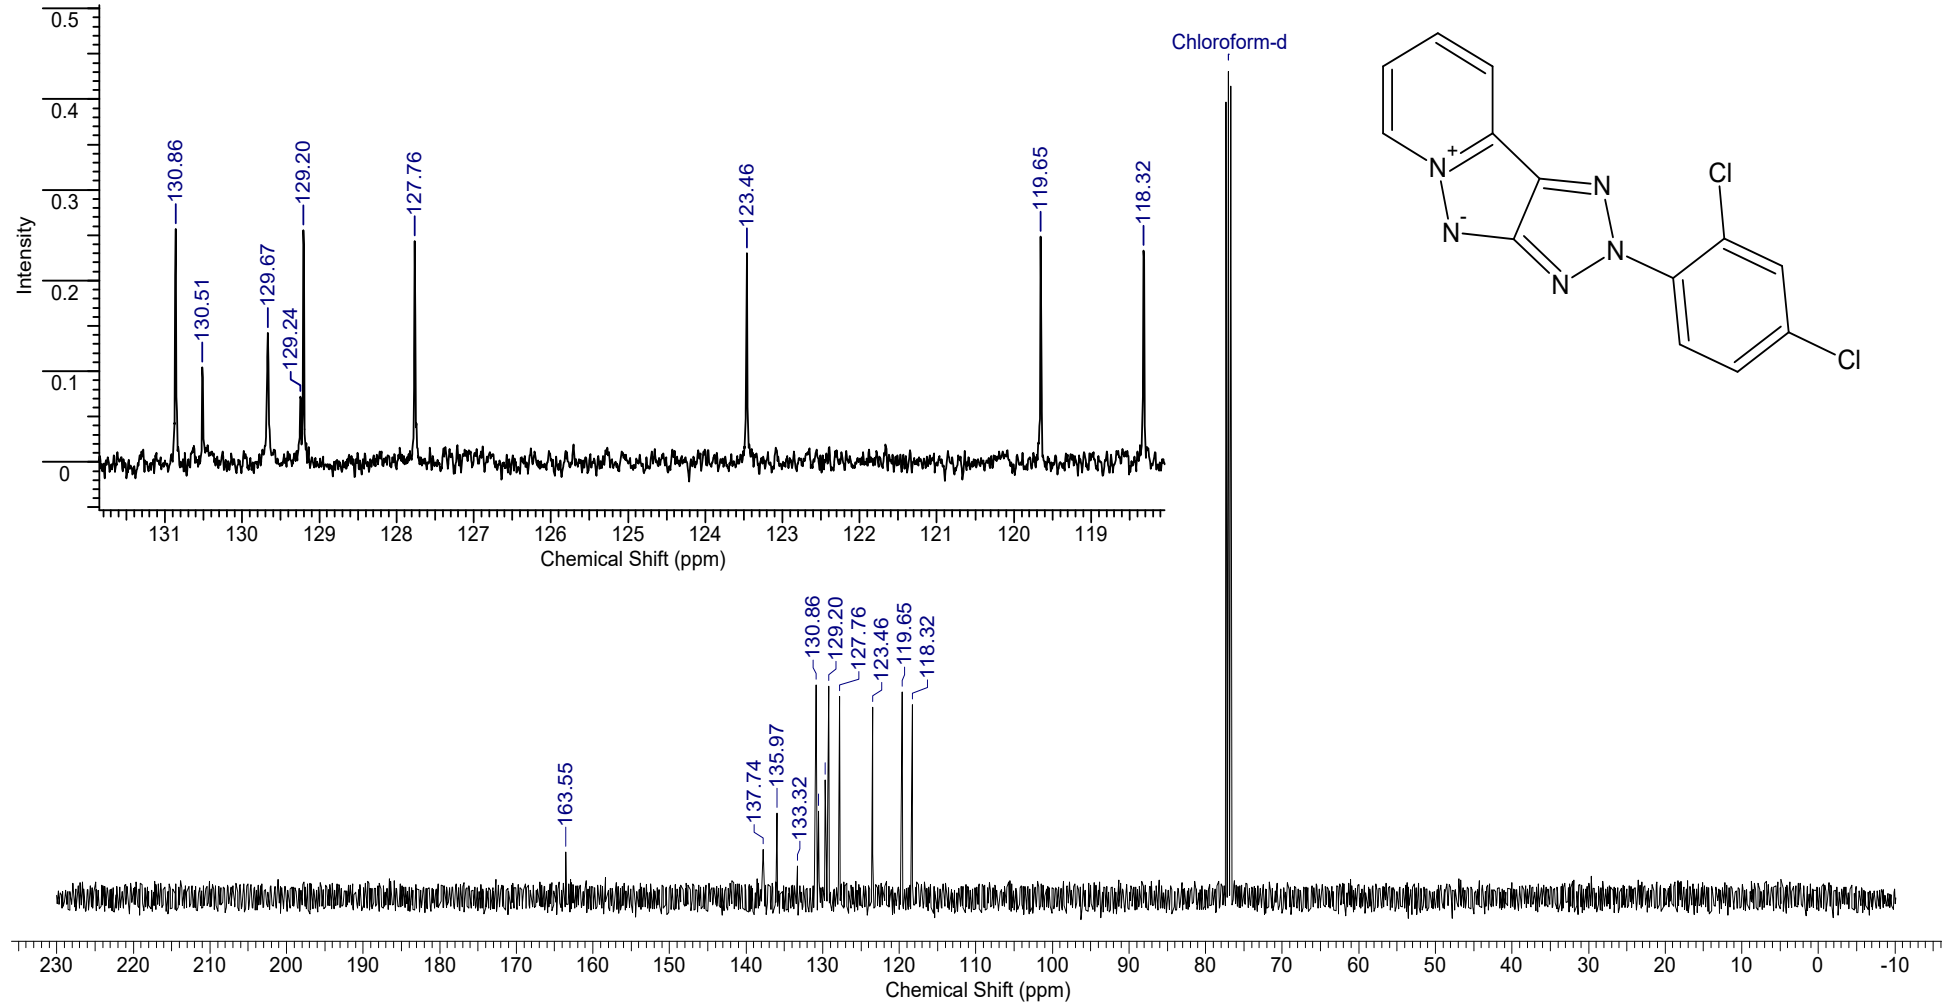

$^{13}\text{C}$  NMR spectrum of **3j** (100.6 MHz,  $\text{CDCl}_3$ )

|                               |                |                              |                      |                         |                      |
|-------------------------------|----------------|------------------------------|----------------------|-------------------------|----------------------|
| <b>Acquisition Time (sec)</b> | 4.0894         | <b>Comment</b>               | Imported from UXNMR. | <b>Date</b>             | 24 Feb 2021 17:33:56 |
| <b>File Name</b>              |                | <b>Number of Transients</b>  | 4                    | <b>Frequency (MHz)</b>  | 400.13               |
| <b>Nucleus</b>                | <sup>1</sup> H | <b>Original Points Count</b> | 32768                | <b>Points Count</b>     | 131072               |
| <b>Pulse Sequence</b>         | zg30           | <b>Solvent</b>               | CHLOROFORM-D         | <b>Sweep Width (Hz)</b> | 8012.82              |
| <b>Temperature (degree C)</b> | 27.000         |                              |                      |                         |                      |

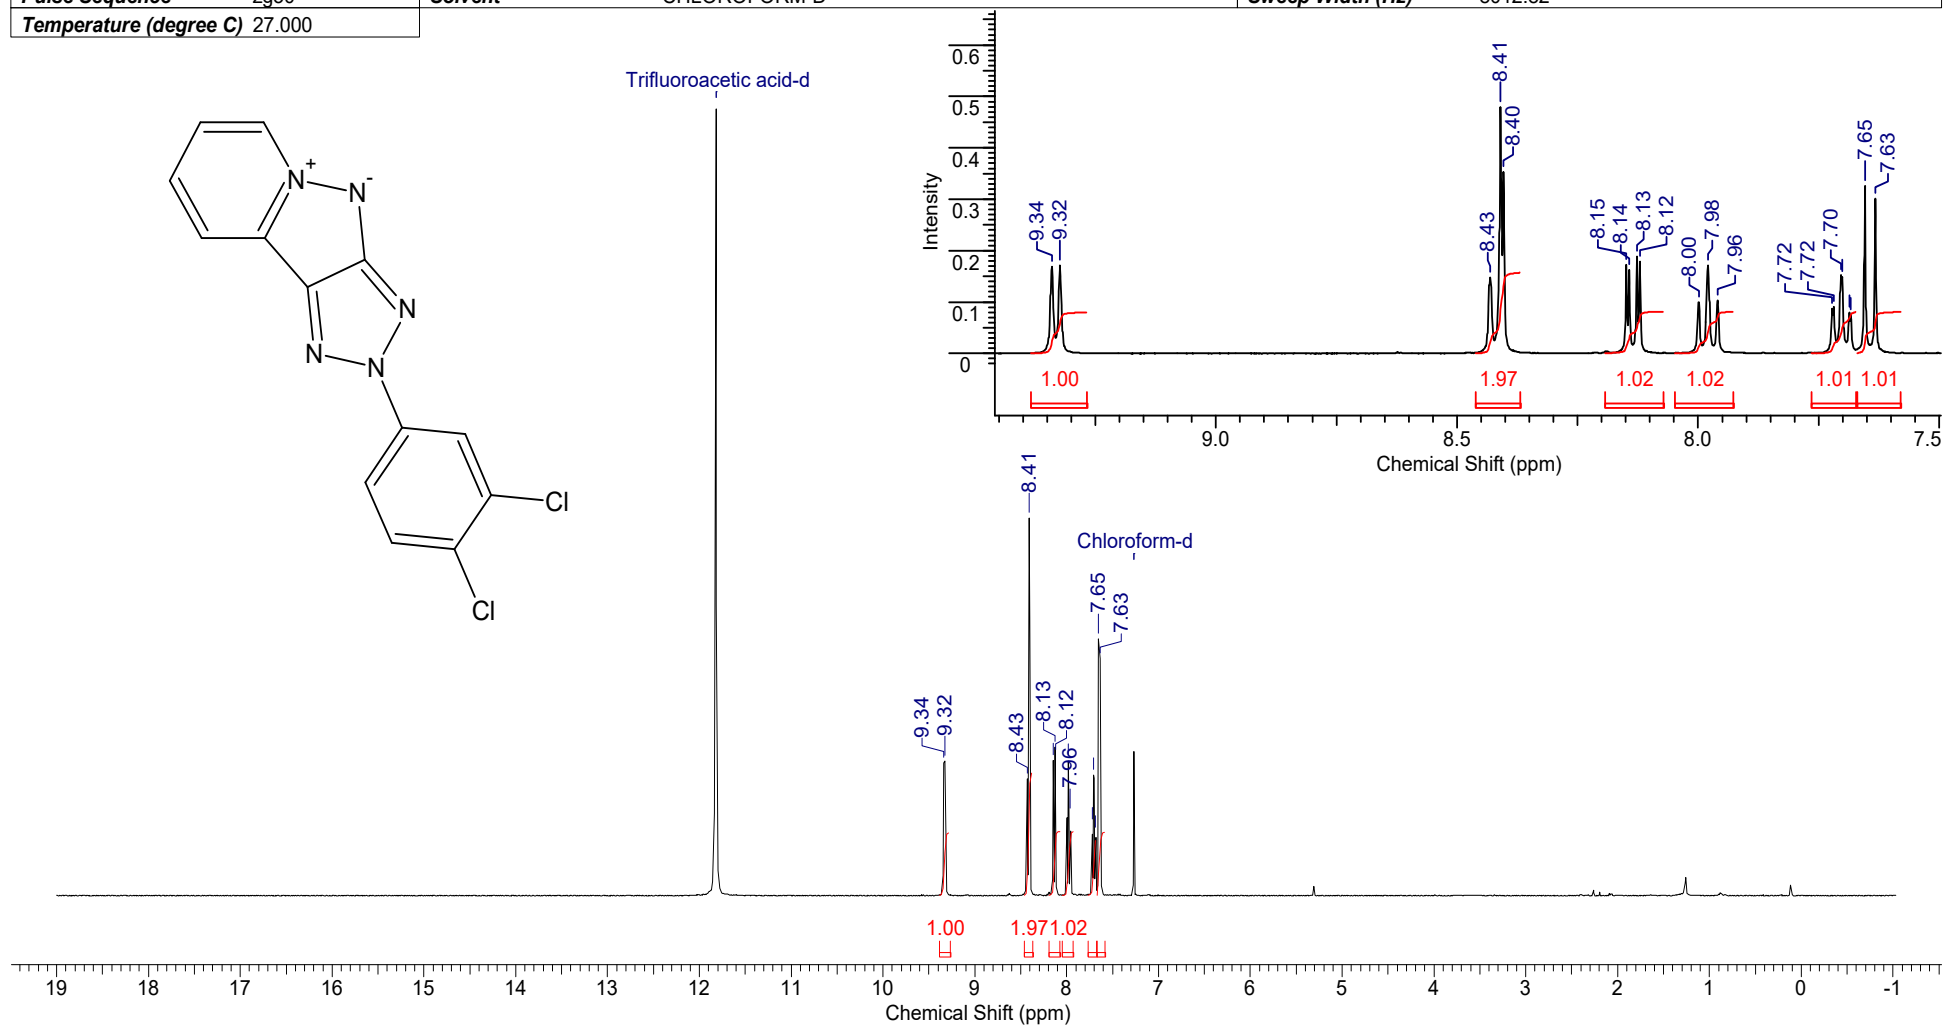

$^1\text{H}$  NMR spectrum of **3k** (400.1 MHz,  $\text{CDCl}_3$ )

|                               |        |                             |                      |                              |                        |                               |        |
|-------------------------------|--------|-----------------------------|----------------------|------------------------------|------------------------|-------------------------------|--------|
| <b>Acquisition Time (sec)</b> | 0.6783 | <b>Comment</b>              | Imported from UXMNR. |                              | <b>Date</b>            | 25 Feb 2021 12:24:56          |        |
| <b>File Name</b>              |        |                             |                      |                              | <b>Frequency (MHz)</b> | 100.61                        |        |
| <b>Nucleus</b>                | 13C    | <b>Number of Transients</b> | 326                  | <b>Original Points Count</b> | 16384                  | <b>Points Count</b>           | 131072 |
| <b>Pulse Sequence</b>         | zgpg30 | <b>Solvent</b>              | CHLOROFORM-D         | <b>Sweep Width (Hz)</b>      | 24154.59               | <b>Temperature (degree C)</b> | 27.000 |

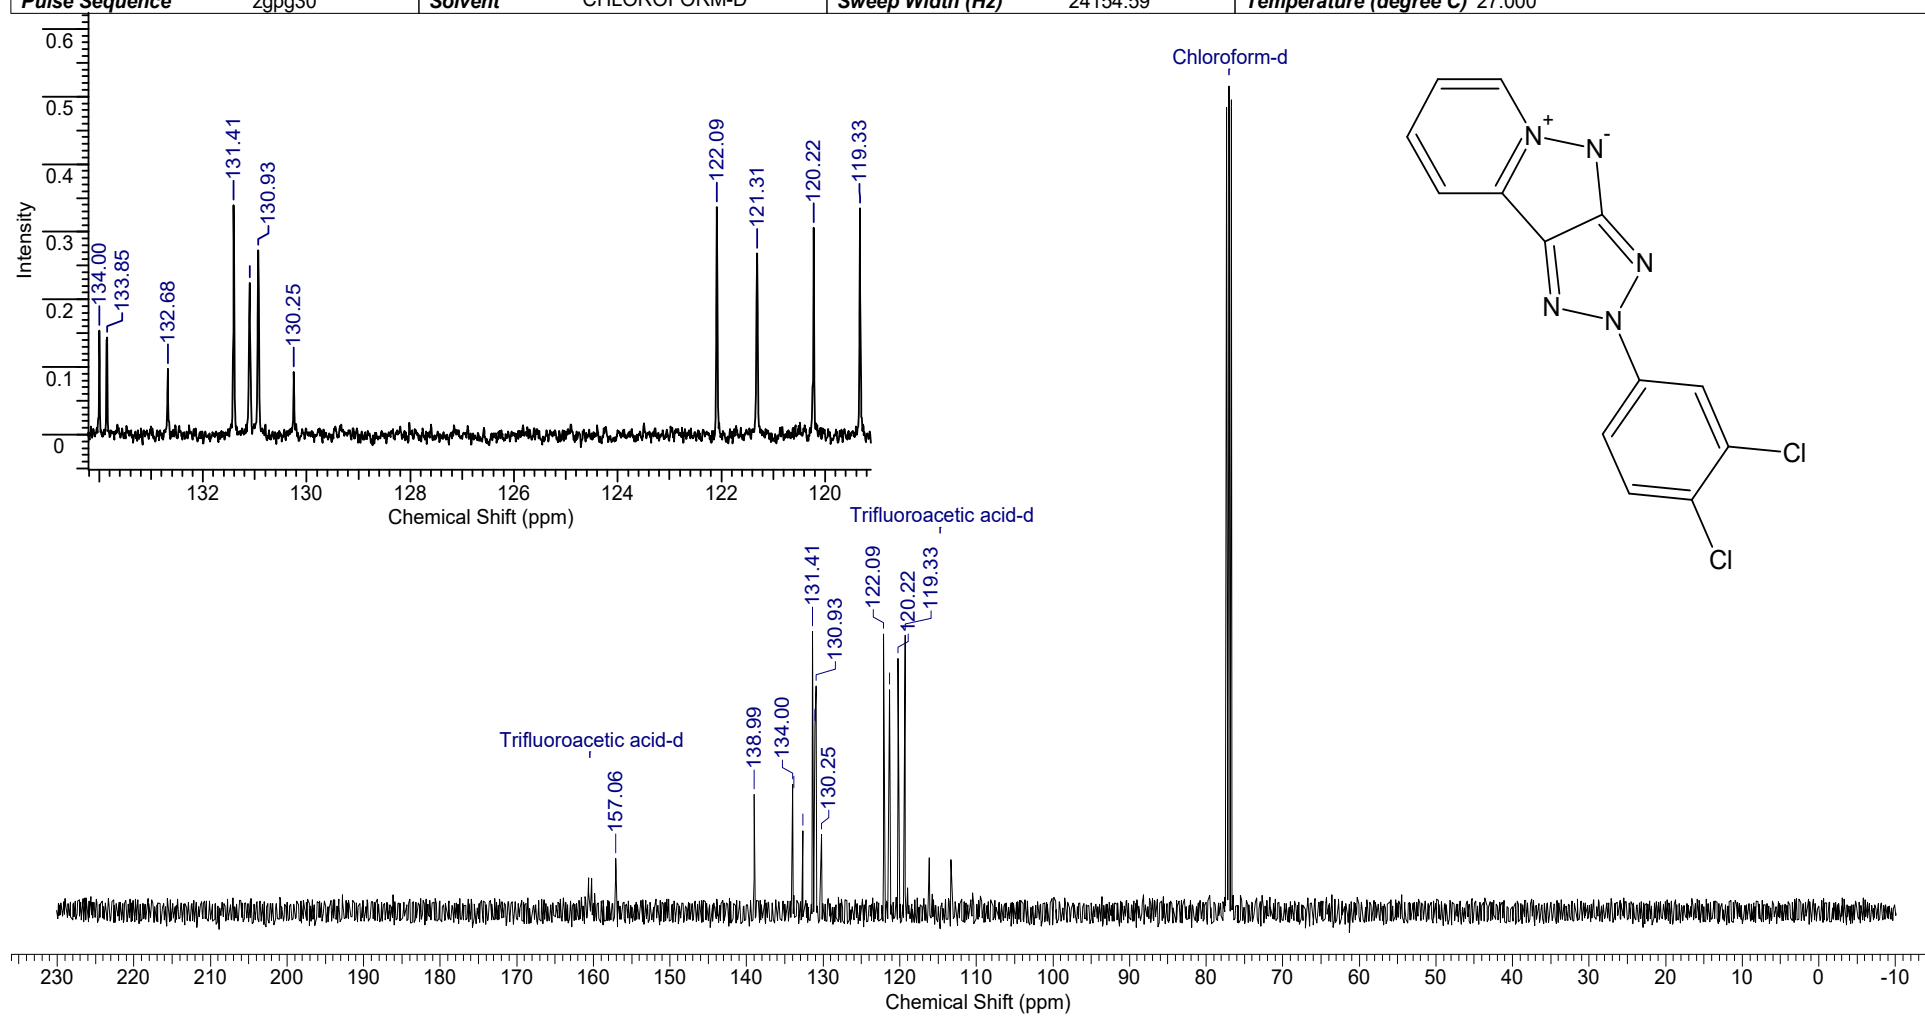



$^{13}\text{C}$  NMR spectrum of **3k** (100.6 MHz,  $\text{CDCl}_3$ )

|                               |                |                              |                      |                         |                      |
|-------------------------------|----------------|------------------------------|----------------------|-------------------------|----------------------|
| <b>Acquisition Time (sec)</b> | 4.0894         | <b>Comment</b>               | Imported from UXNMR. | <b>Date</b>             | 04 Feb 2021 11:40:42 |
| <b>File Name</b>              |                | <b>Number of Transients</b>  | 4                    | <b>Frequency (MHz)</b>  | 400.13               |
| <b>Nucleus</b>                | <sup>1</sup> H | <b>Original Points Count</b> | 32768                | <b>Points Count</b>     | 131072               |
| <b>Pulse Sequence</b>         | zg30           | <b>Solvent</b>               | CHLOROFORM-D         | <b>Sweep Width (Hz)</b> | 8012.82              |
| <b>Temperature (degree C)</b> | 27.000         |                              |                      |                         |                      |

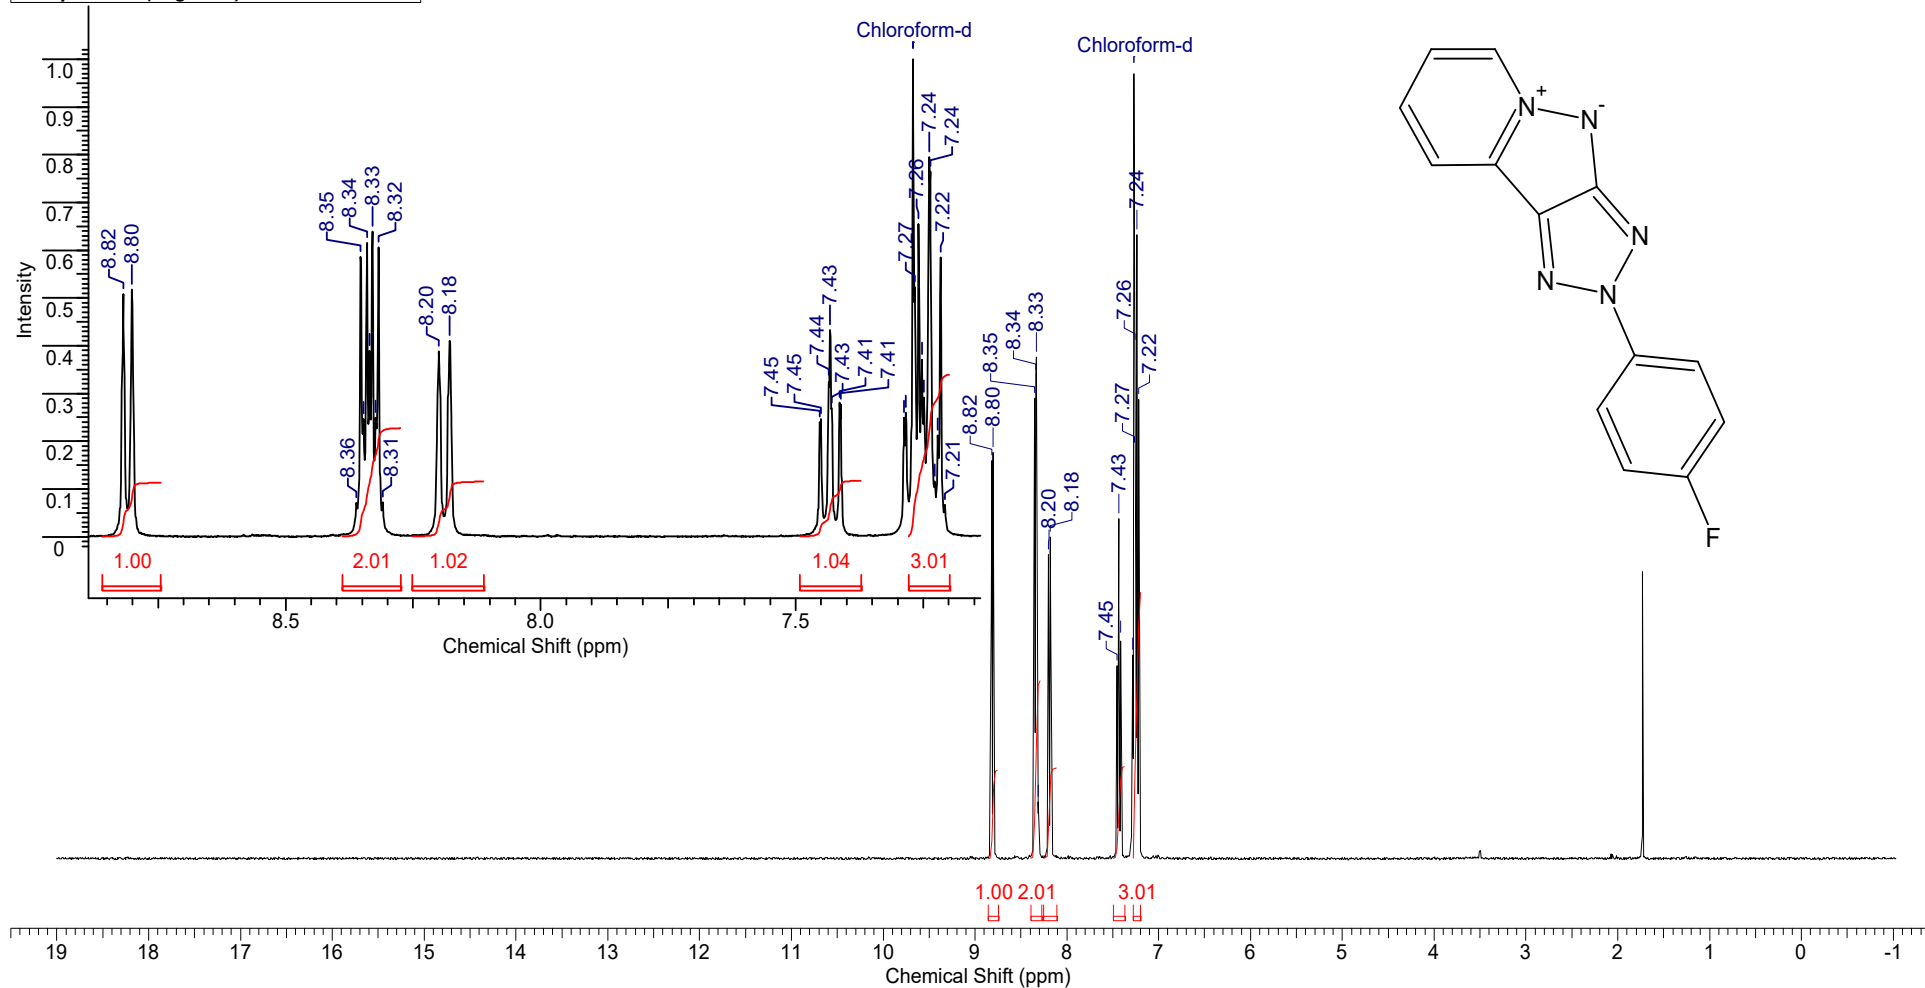

$^1\text{H}$  NMR spectrum of **31** (400.1 MHz,  $\text{CDCl}_3$ )

|                               |        |                             |                      |                              |                        |                               |        |
|-------------------------------|--------|-----------------------------|----------------------|------------------------------|------------------------|-------------------------------|--------|
| <b>Acquisition Time (sec)</b> | 0.6783 | <b>Comment</b>              | Imported from UXMNR. |                              | <b>Date</b>            | 04 Feb 2021 11:59:10          |        |
| <b>File Name</b>              |        |                             |                      |                              | <b>Frequency (MHz)</b> | 100.61                        |        |
| <b>Nucleus</b>                | 13C    | <b>Number of Transients</b> | 474                  | <b>Original Points Count</b> | 16384                  | <b>Points Count</b>           | 131072 |
| <b>Pulse Sequence</b>         | zgpg30 | <b>Solvent</b>              | CHLOROFORM-D         | <b>Sweep Width (Hz)</b>      | 24154.59               | <b>Temperature (degree C)</b> | 27.000 |

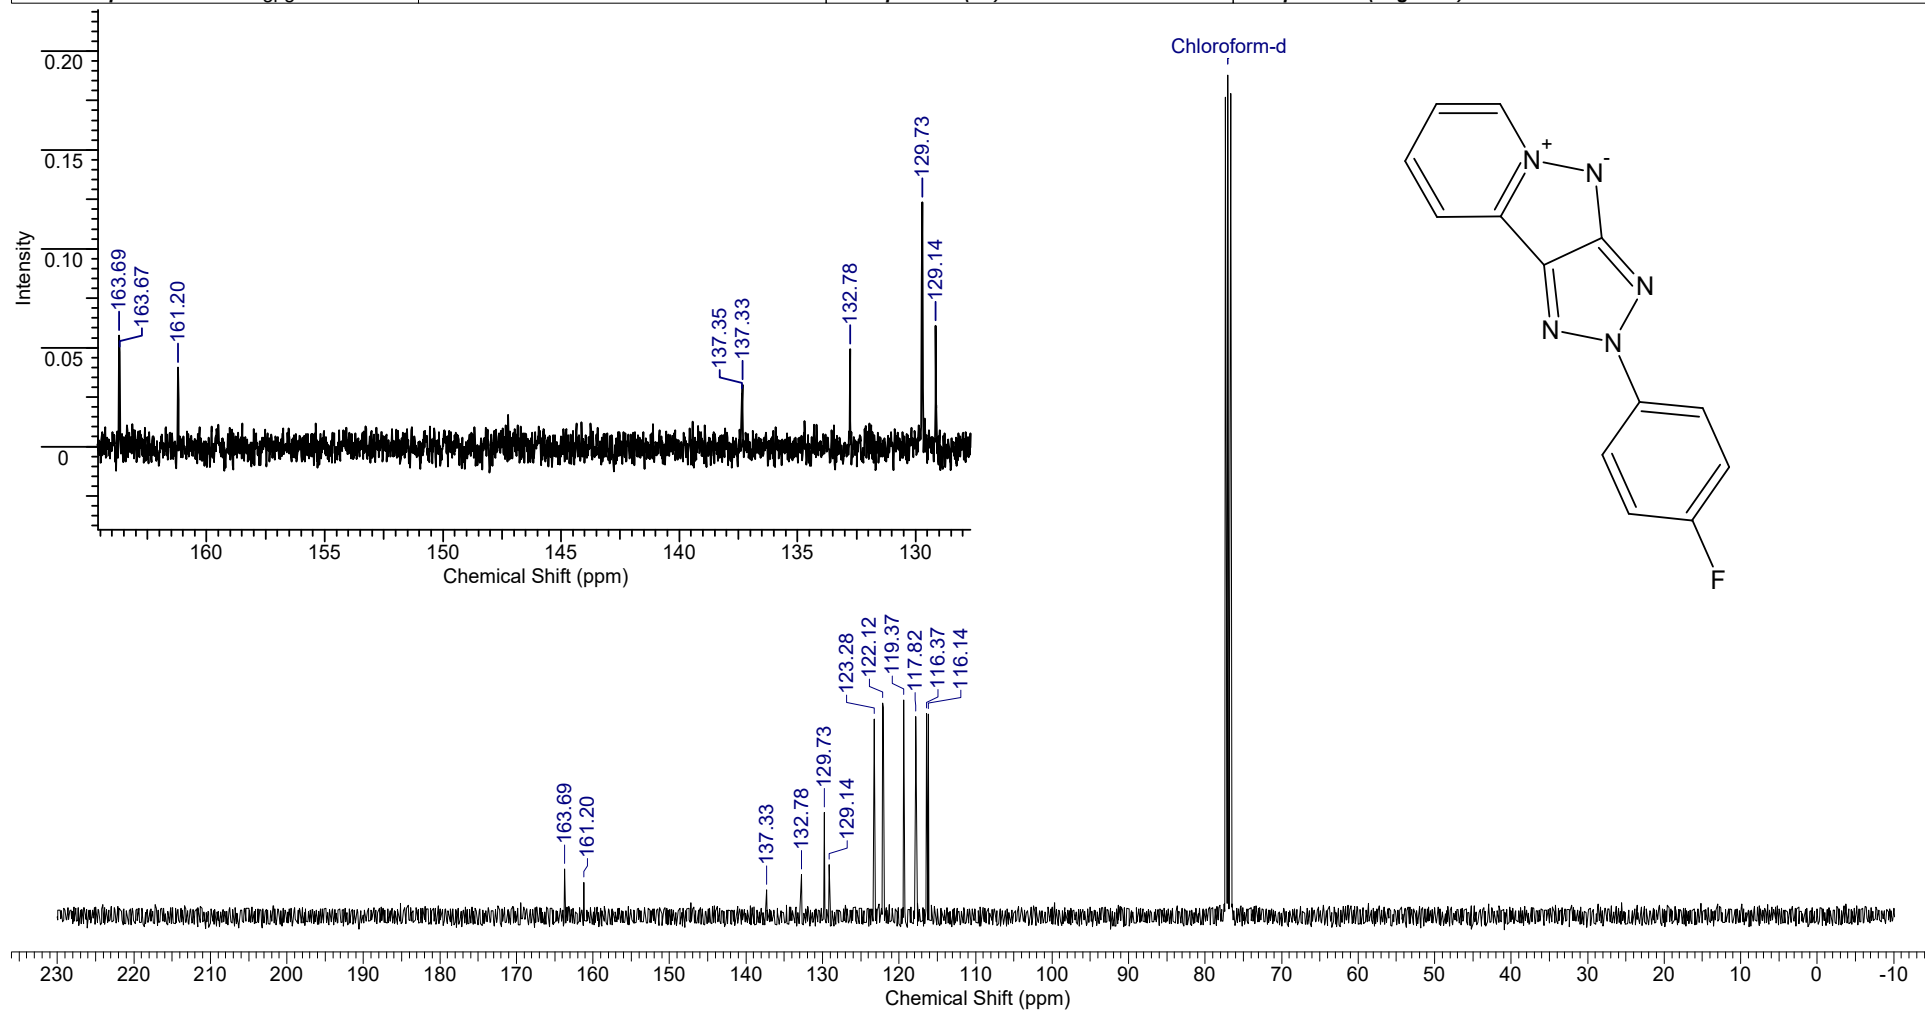

<sup>13</sup>C NMR spectrum of **31** (100.6 MHz, CDCl<sub>3</sub>)

23 Mar 2021

|                        |        |                      |                      |                       |                      |
|------------------------|--------|----------------------|----------------------|-----------------------|----------------------|
| Acquisition Time (sec) | 1.7433 | Comment              | Imported from UXNMR. | Date                  | 08 Feb 2021 15:53:24 |
| File Name              |        |                      |                      | Frequency (MHz)       | 376.50               |
| Nucleus                | 19F    | Number of Transients | 16                   | Original Points Count | 131072               |
| Pulse Sequence         | zgflqn | Solvent              | CHLOROFORM-D         | Points Count          | 262144               |
| Temperature (degree C) | 27.000 |                      |                      | Sweep Width (Hz)      | 75187.97             |

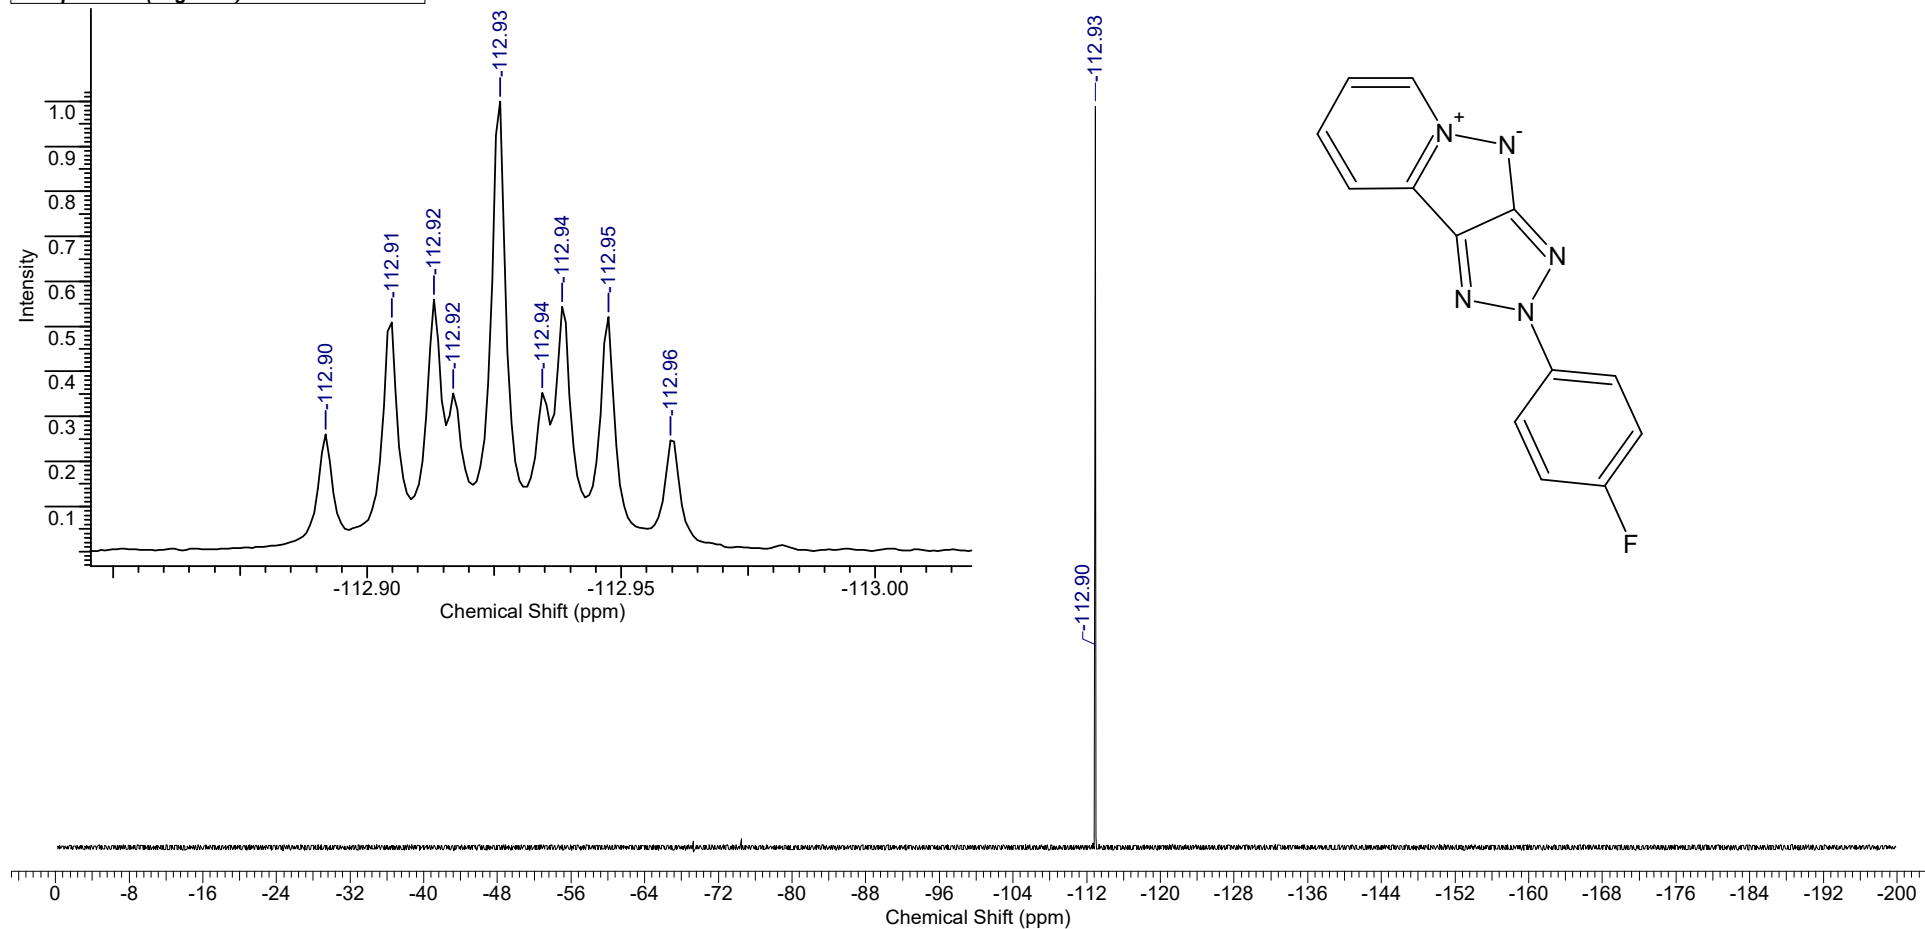

$^{19}\text{F}$  NMR spectrum of **31** (376.5 MHz,  $\text{CDCl}_3$ )

|                               |        |                             |                      |                              |                      |
|-------------------------------|--------|-----------------------------|----------------------|------------------------------|----------------------|
| <b>Acquisition Time (sec)</b> | 4.0894 | <b>Comment</b>              | Imported from UXNMR. | <b>Date</b>                  | 17 Feb 2021 17:48:14 |
| <b>File Name</b>              |        | <b>Number of Transients</b> | 4                    | <b>Original Points Count</b> | 32768                |
| <b>Nucleus</b>                | 1H     | <b>Solvent</b>              | CHLOROFORM-D         | <b>Frequency (MHz)</b>       | 400.13               |
| <b>Pulse Sequence</b>         | zg30   |                             |                      | <b>Points Count</b>          | 131072               |
| <b>Temperature (degree C)</b> | 27.000 |                             |                      | <b>Sweep Width (Hz)</b>      | 8012.82              |

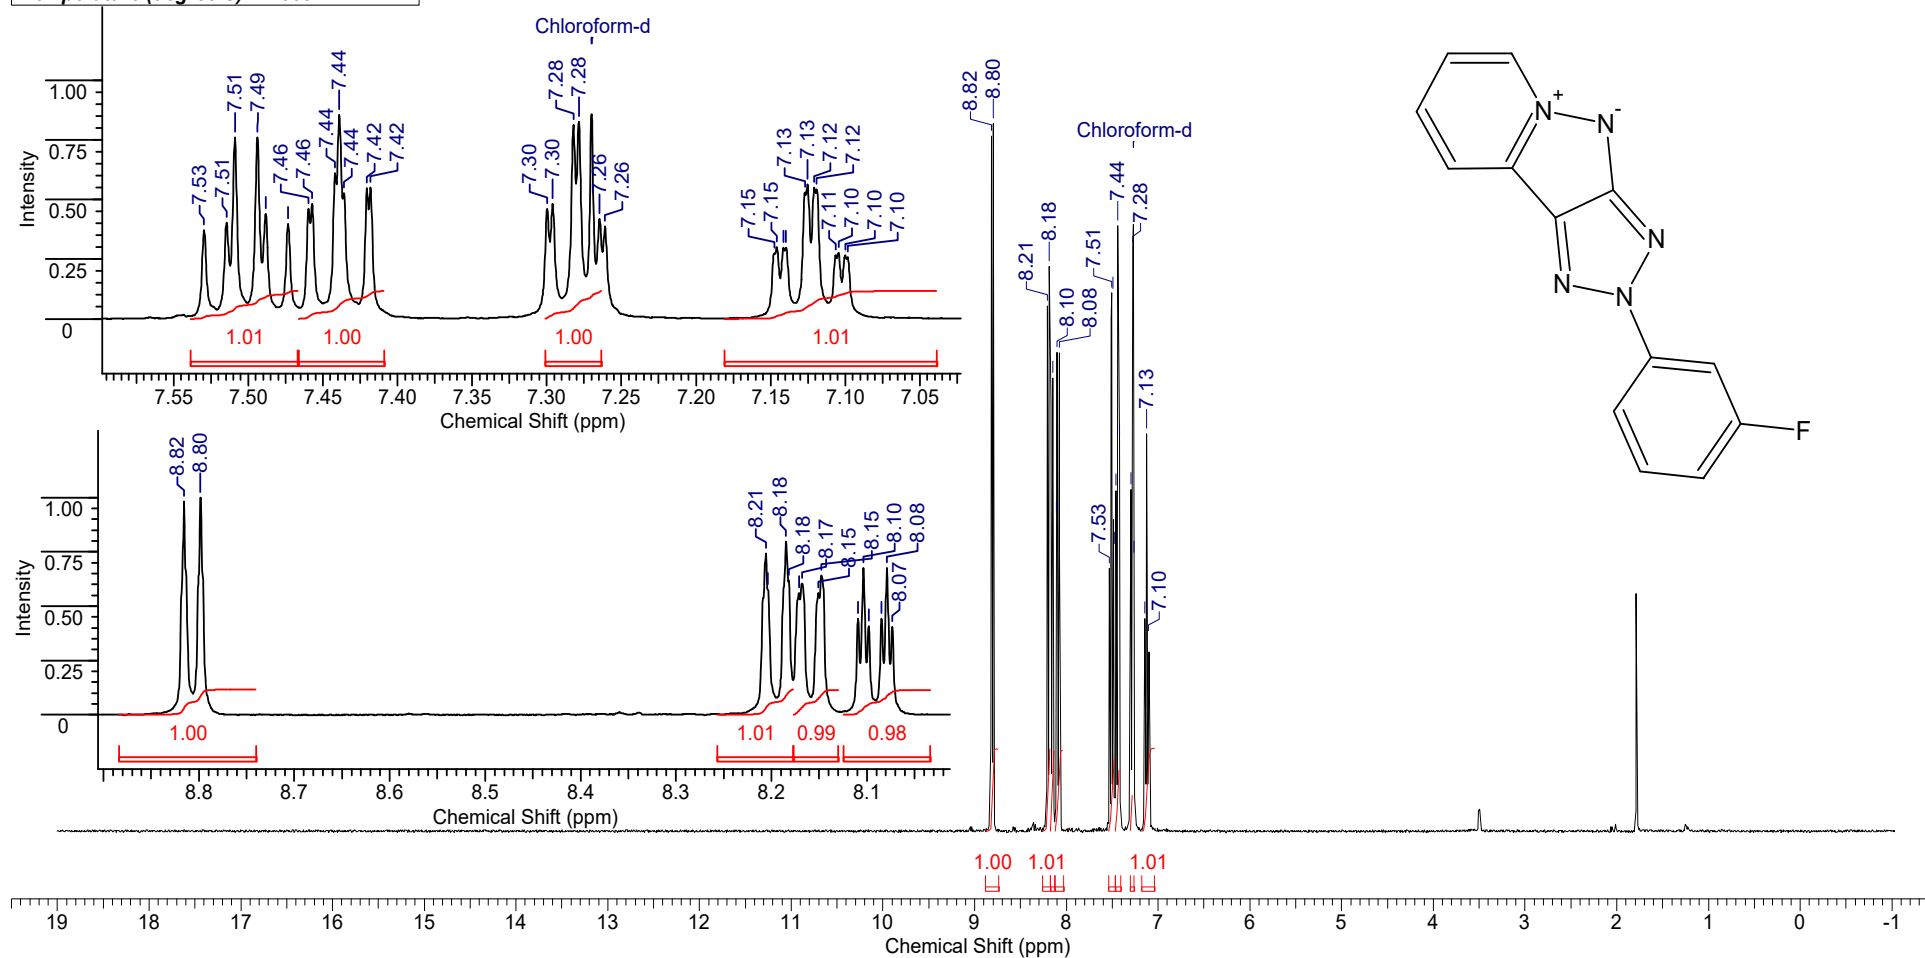

$^1\text{H}$  NMR spectrum of **3m** (400.1 MHz,  $\text{CDCl}_3$ )



|                               |         |                             |                      |                              |                         |                      |        |
|-------------------------------|---------|-----------------------------|----------------------|------------------------------|-------------------------|----------------------|--------|
| <b>Acquisition Time (sec)</b> | 0.6783  | <b>Comment</b>              | Imported from UXNMR. |                              | <b>Date</b>             | 25 Feb 2021 15:21:28 |        |
| <b>File Name</b>              |         |                             |                      |                              | <b>Frequency (MHz)</b>  | 100.61               |        |
| <b>Nucleus</b>                | 13C     | <b>Number of Transients</b> | 217                  | <b>Original Points Count</b> | 16384                   | <b>Points Count</b>  | 131072 |
| <b>Pulse Sequence</b>         | zpgpg30 | <b>Solvent</b>              | CHLOROFORM-D         |                              | <b>Sweep Width (Hz)</b> | 24154.59             |        |
| <b>Temperature (degree C)</b> | 27.000  |                             |                      |                              |                         |                      |        |

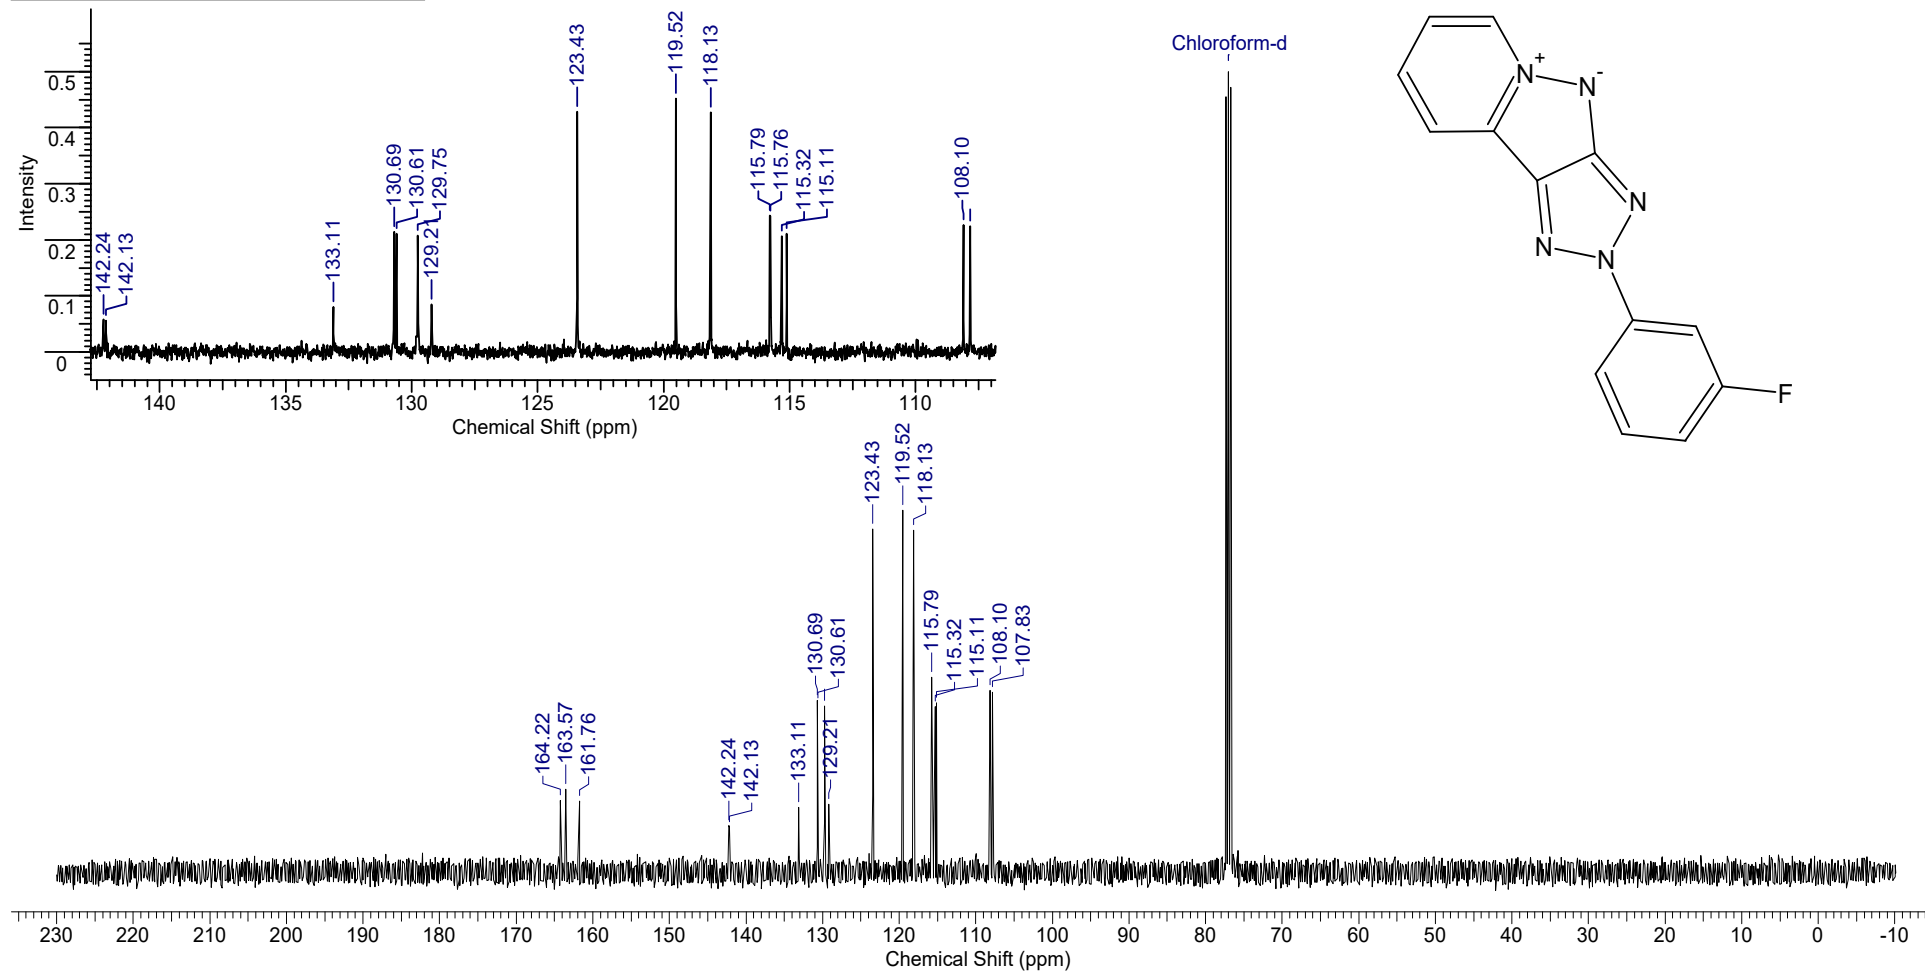

<sup>13</sup>C NMR spectrum of **3m** (100.6 MHz, CDCl<sub>3</sub>)

24 Mar 2021

|                               |        |                             |                      |                              |                      |
|-------------------------------|--------|-----------------------------|----------------------|------------------------------|----------------------|
| <b>Acquisition Time (sec)</b> | 1.7433 | <b>Comment</b>              | Imported from UXNMR. | <b>Date</b>                  | 15 Feb 2021 15:38:30 |
| <b>File Name</b>              |        |                             |                      | <b>Frequency (MHz)</b>       | 376.50               |
| <b>Nucleus</b>                | 19F    | <b>Number of Transients</b> | 16                   | <b>Original Points Count</b> | 131072               |
| <b>Pulse Sequence</b>         | zgflqn | <b>Solvent</b>              | CHLOROFORM-D         | <b>Points Count</b>          | 262144               |
| <b>Temperature (degree C)</b> | 27.000 |                             |                      | <b>Sweep Width (Hz)</b>      | 75187.97             |

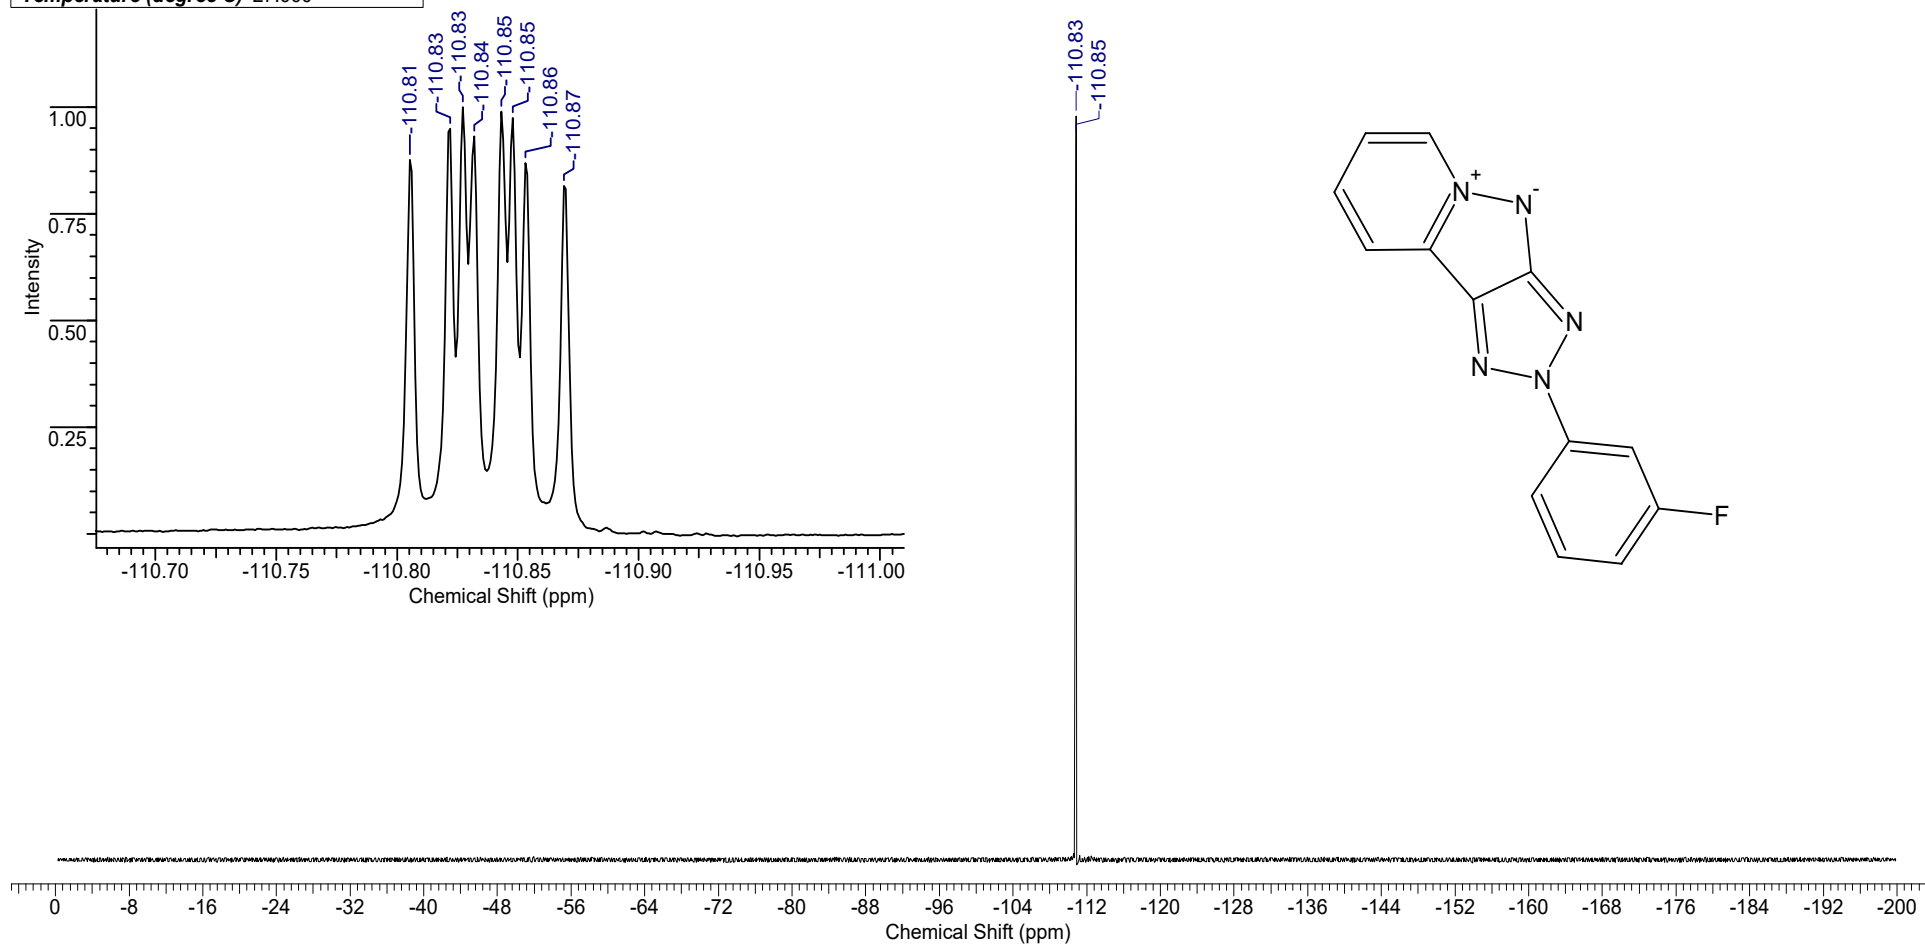

$^{19}\text{F}$  NMR spectrum of **3m** (376.5 MHz,  $\text{CDCl}_3$ )

|                               |                |                              |                      |                         |                      |
|-------------------------------|----------------|------------------------------|----------------------|-------------------------|----------------------|
| <b>Acquisition Time (sec)</b> | 4.0894         | <b>Comment</b>               | Imported from UXNMR. | <b>Date</b>             | 30 Oct 2020 15:28:22 |
| <b>File Name</b>              |                | <b>Number of Transients</b>  | 4                    | <b>Frequency (MHz)</b>  | 400.13               |
| <b>Nucleus</b>                | <sup>1</sup> H | <b>Original Points Count</b> | 32768                | <b>Points Count</b>     | 131072               |
| <b>Pulse Sequence</b>         | zg30           | <b>Solvent</b>               | CHLOROFORM-D         | <b>Sweep Width (Hz)</b> | 8012.82              |
| <b>Temperature (degree C)</b> | 27.000         |                              |                      |                         |                      |

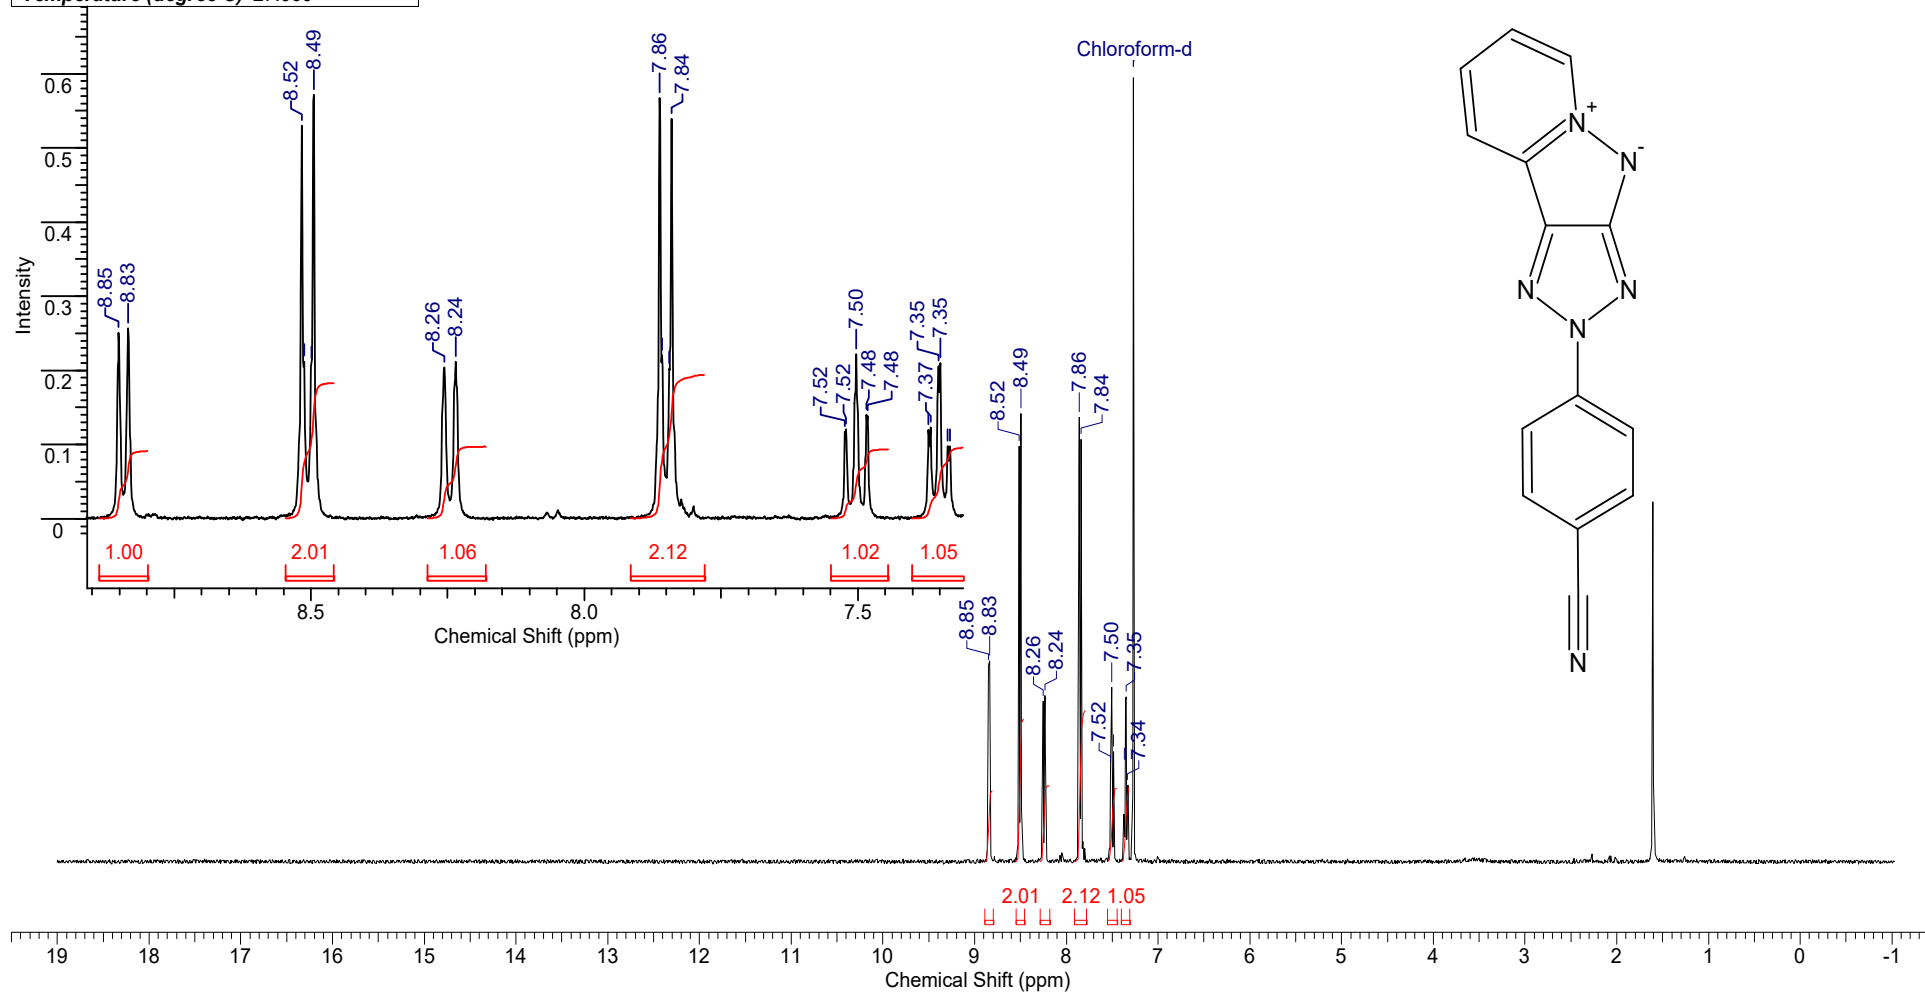

$^1\text{H}$  NMR spectrum of **3n** (400.1 MHz,  $\text{CDCl}_3$ )

|                               |          |                               |                        |                       |                |                      |                             |      |
|-------------------------------|----------|-------------------------------|------------------------|-----------------------|----------------|----------------------|-----------------------------|------|
| <b>Acquisition Time (sec)</b> | 0.6783   | <b>Comment</b>                | Imported from UXNMR.   |                       | <b>Date</b>    | 05 Nov 2020 11:29:46 |                             |      |
| <b>File Name</b>              |          |                               | <b>Frequency (MHz)</b> | 100.61                | <b>Nucleus</b> | 13C                  | <b>Number of Transients</b> | 1513 |
| <b>Original Points Count</b>  | 16384    | <b>Points Count</b>           | 131072                 | <b>Pulse Sequence</b> | zgpg30         | <b>Solvent</b>       | CHLOROFORM-D                |      |
| <b>Sweep Width (Hz)</b>       | 24154.59 | <b>Temperature (degree C)</b> | 27.000                 |                       |                |                      |                             |      |

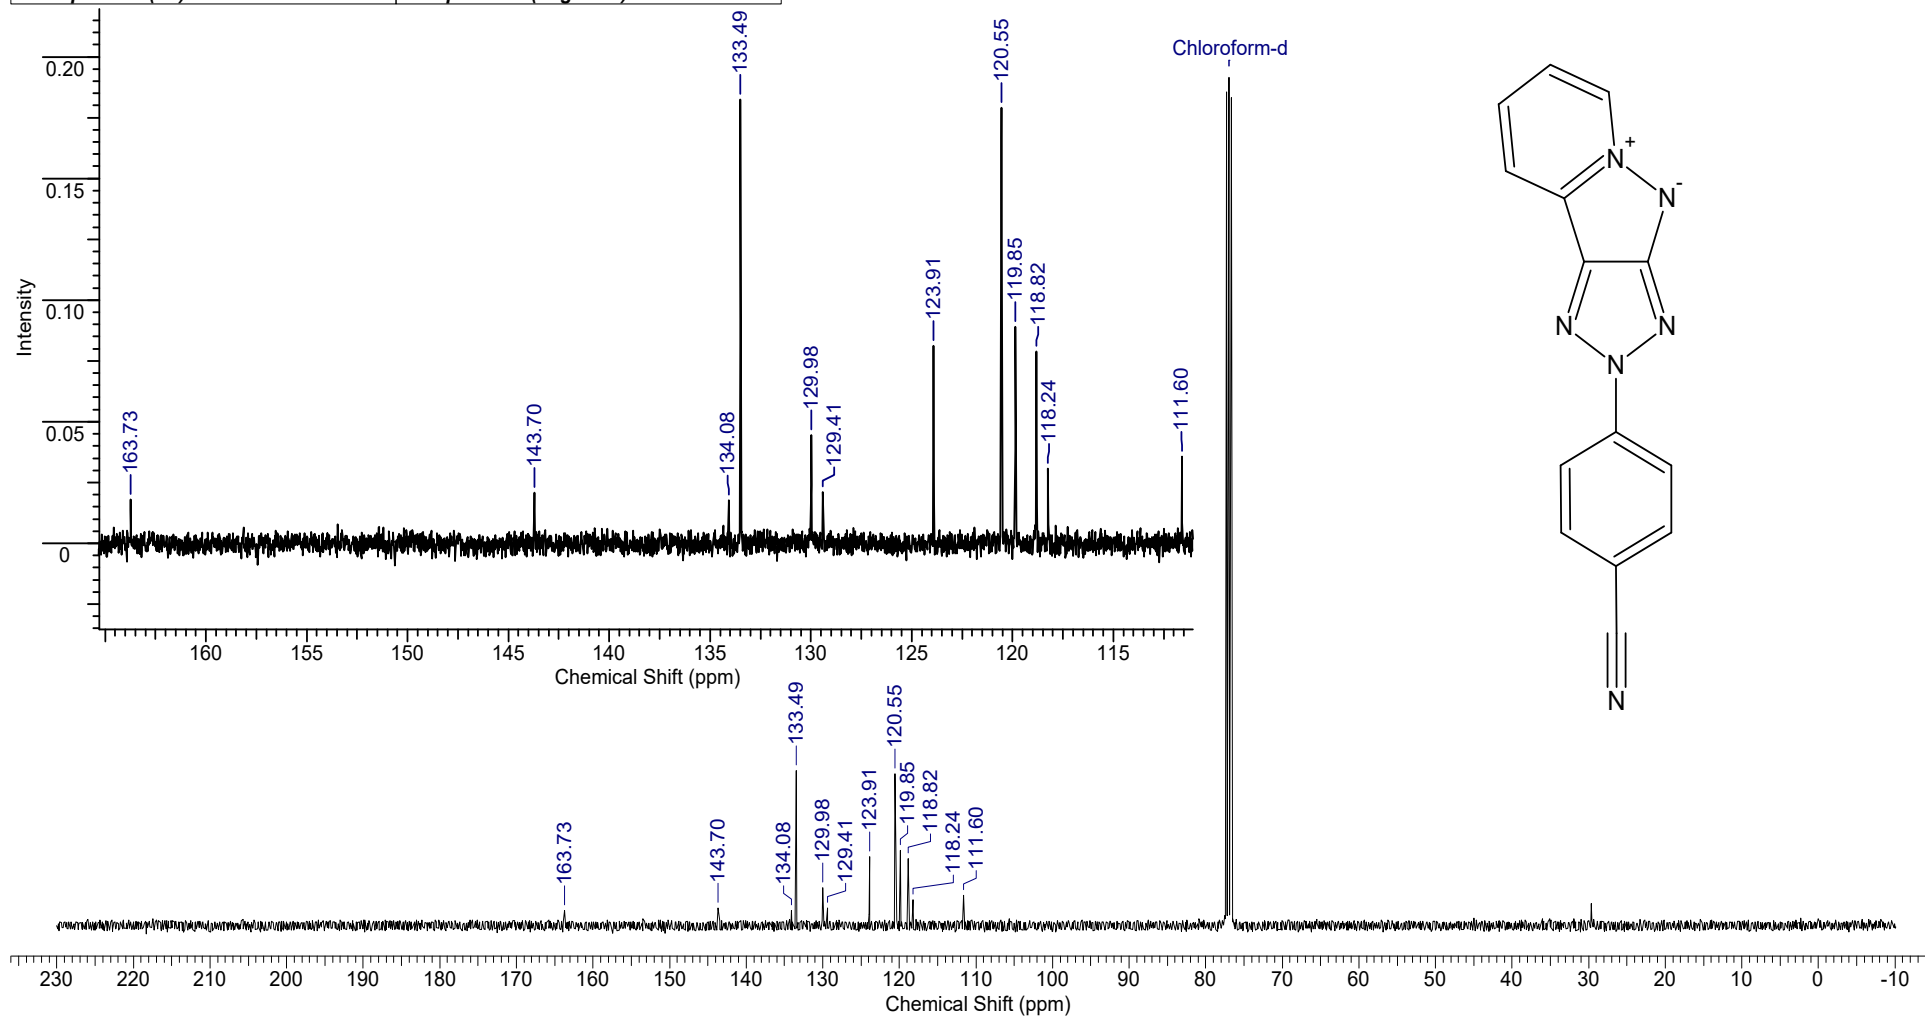

$^{13}\text{C}$  NMR spectrum of **3n** (100.6 MHz,  $\text{CDCl}_3$ )

|                               |        |                             |                      |                              |                      |
|-------------------------------|--------|-----------------------------|----------------------|------------------------------|----------------------|
| <b>Acquisition Time (sec)</b> | 4.0894 | <b>Comment</b>              | Imported from UXMNR. | <b>Date</b>                  | 06 Nov 2020 15:58:04 |
| <b>File Name</b>              |        |                             |                      | <b>Frequency (MHz)</b>       | 400.13               |
| <b>Nucleus</b>                | 1H     | <b>Number of Transients</b> | 4                    | <b>Original Points Count</b> | 32768                |
| <b>Pulse Sequence</b>         | zg30   | <b>Solvent</b>              | CHLOROFORM-D         | <b>Points Count</b>          | 131072               |
| <b>Temperature (degree C)</b> | 27.000 |                             |                      | <b>Sweep Width (Hz)</b>      | 8012.82              |

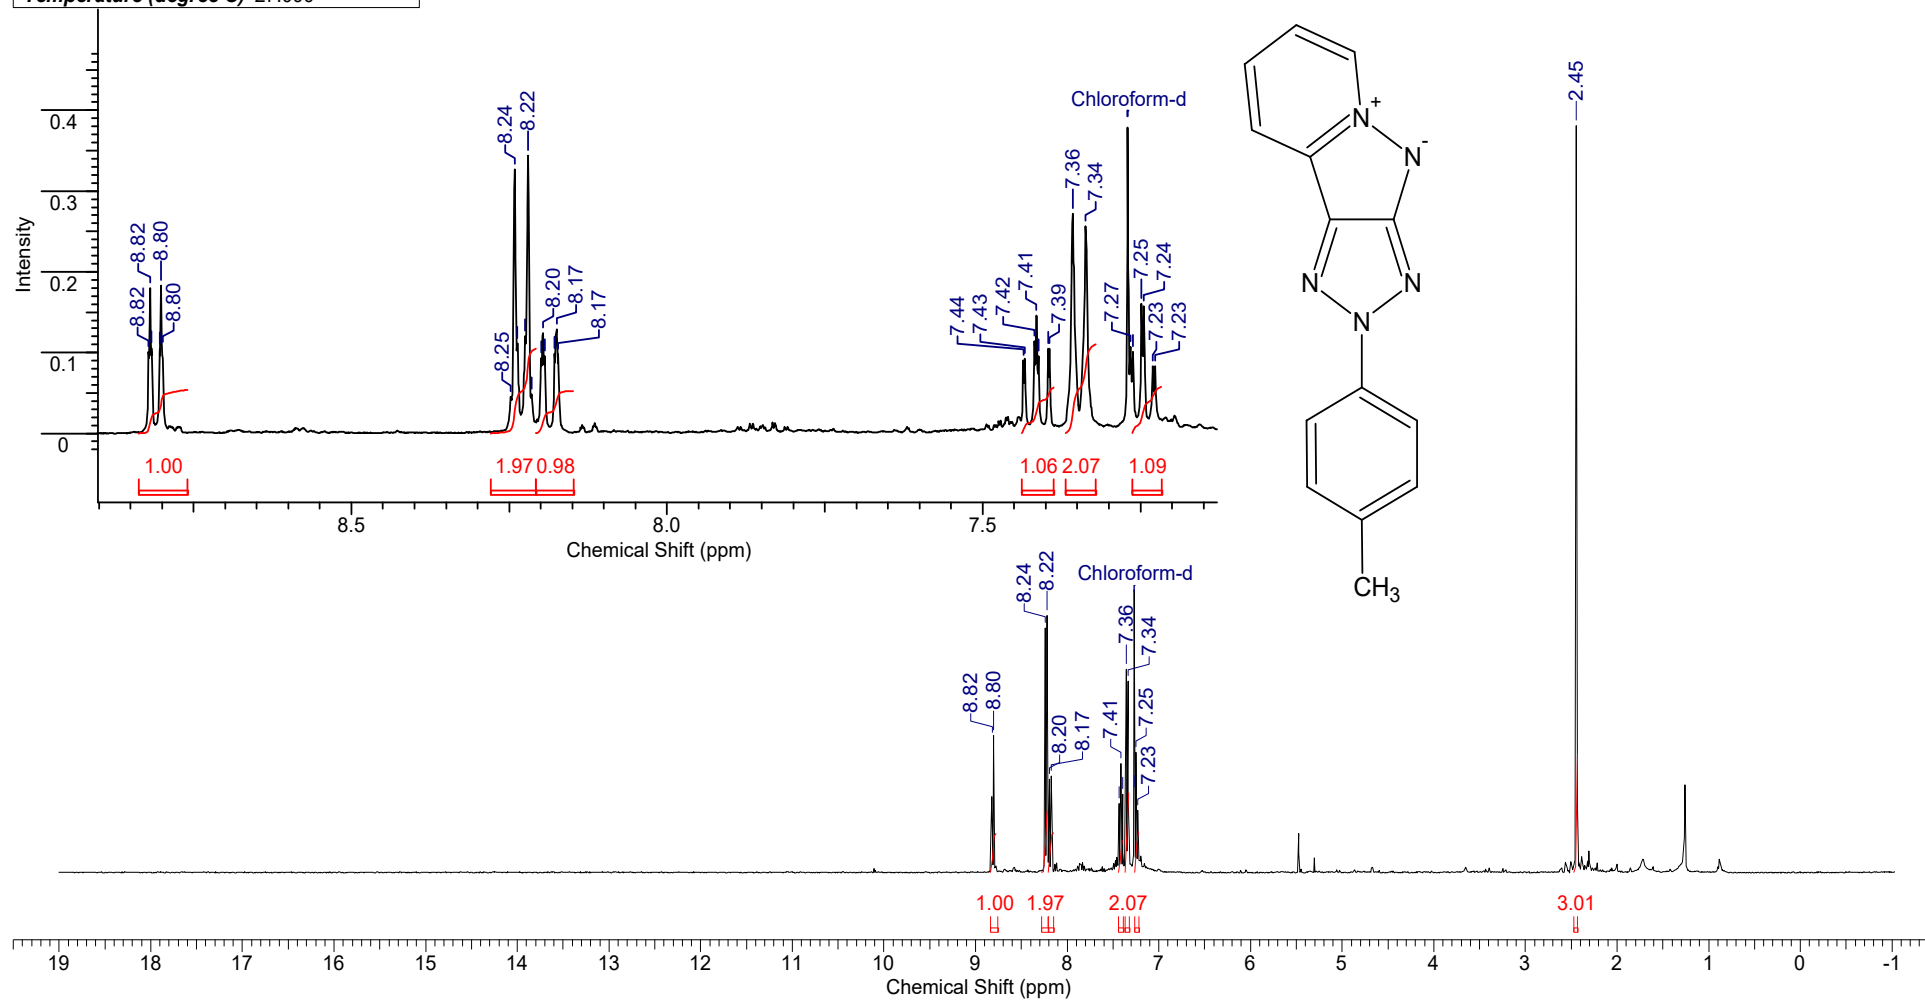



$^1\text{H}$  NMR spectrum of **3o** (400.1 MHz,  $\text{CDCl}_3$ )

|                               |        |                             |                      |                              |                         |                      |        |
|-------------------------------|--------|-----------------------------|----------------------|------------------------------|-------------------------|----------------------|--------|
| <b>Acquisition Time (sec)</b> | 0.6783 | <b>Comment</b>              | Imported from UXNMR. |                              | <b>Date</b>             | 13 Nov 2020 16:13:14 |        |
| <b>File Name</b>              |        |                             |                      |                              | <b>Frequency (MHz)</b>  | 100.61               |        |
| <b>Nucleus</b>                | 13C    | <b>Number of Transients</b> | 219                  | <b>Original Points Count</b> | 16384                   | <b>Points Count</b>  | 131072 |
| <b>Pulse Sequence</b>         | zgpg30 | <b>Solvent</b>              | CHLOROFORM-D         |                              | <b>Sweep Width (Hz)</b> | 24154.59             |        |
| <b>Temperature (degree C)</b> | 27.000 |                             |                      |                              |                         |                      |        |

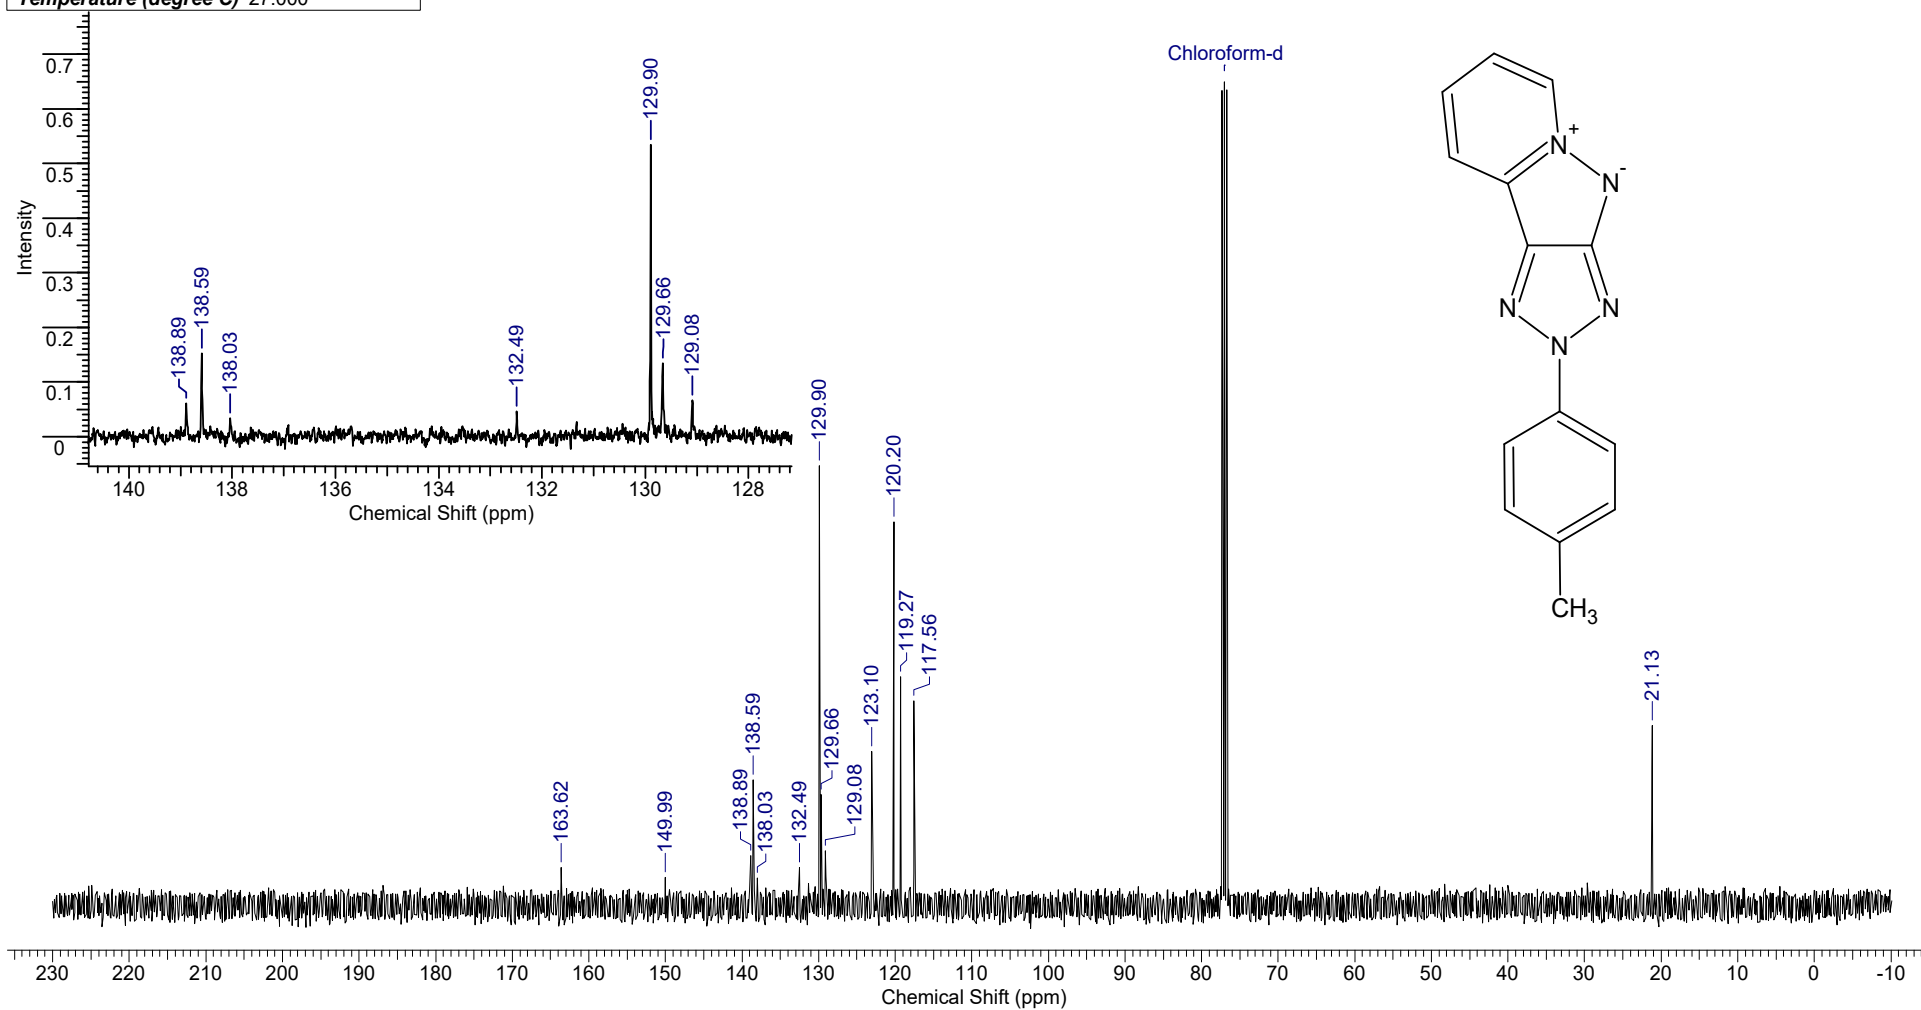

$^{13}\text{C}$  NMR spectrum of **3o** (100.6 MHz,  $\text{CDCl}_3$ )

|                               |        |                             |                      |                              |             |                               |        |
|-------------------------------|--------|-----------------------------|----------------------|------------------------------|-------------|-------------------------------|--------|
| <b>Acquisition Time (sec)</b> | 4.0894 | <b>Comment</b>              | Imported from UXNMR. |                              | <b>Date</b> | 29 Jan 2021 15:38:26          |        |
| <b>File Name</b>              |        | <b>Number of Transients</b> | 4                    | <b>Original Points Count</b> | 32768       | <b>Frequency (MHz)</b>        | 400.13 |
| <b>Nucleus</b>                | 1H     | <b>Solvent</b>              | CHLOROFORM-D         | <b>Sweep Width (Hz)</b>      | 8012.82     | <b>Points Count</b>           | 131072 |
| <b>Pulse Sequence</b>         | zg30   |                             |                      |                              |             | <b>Temperature (degree C)</b> | 27.000 |

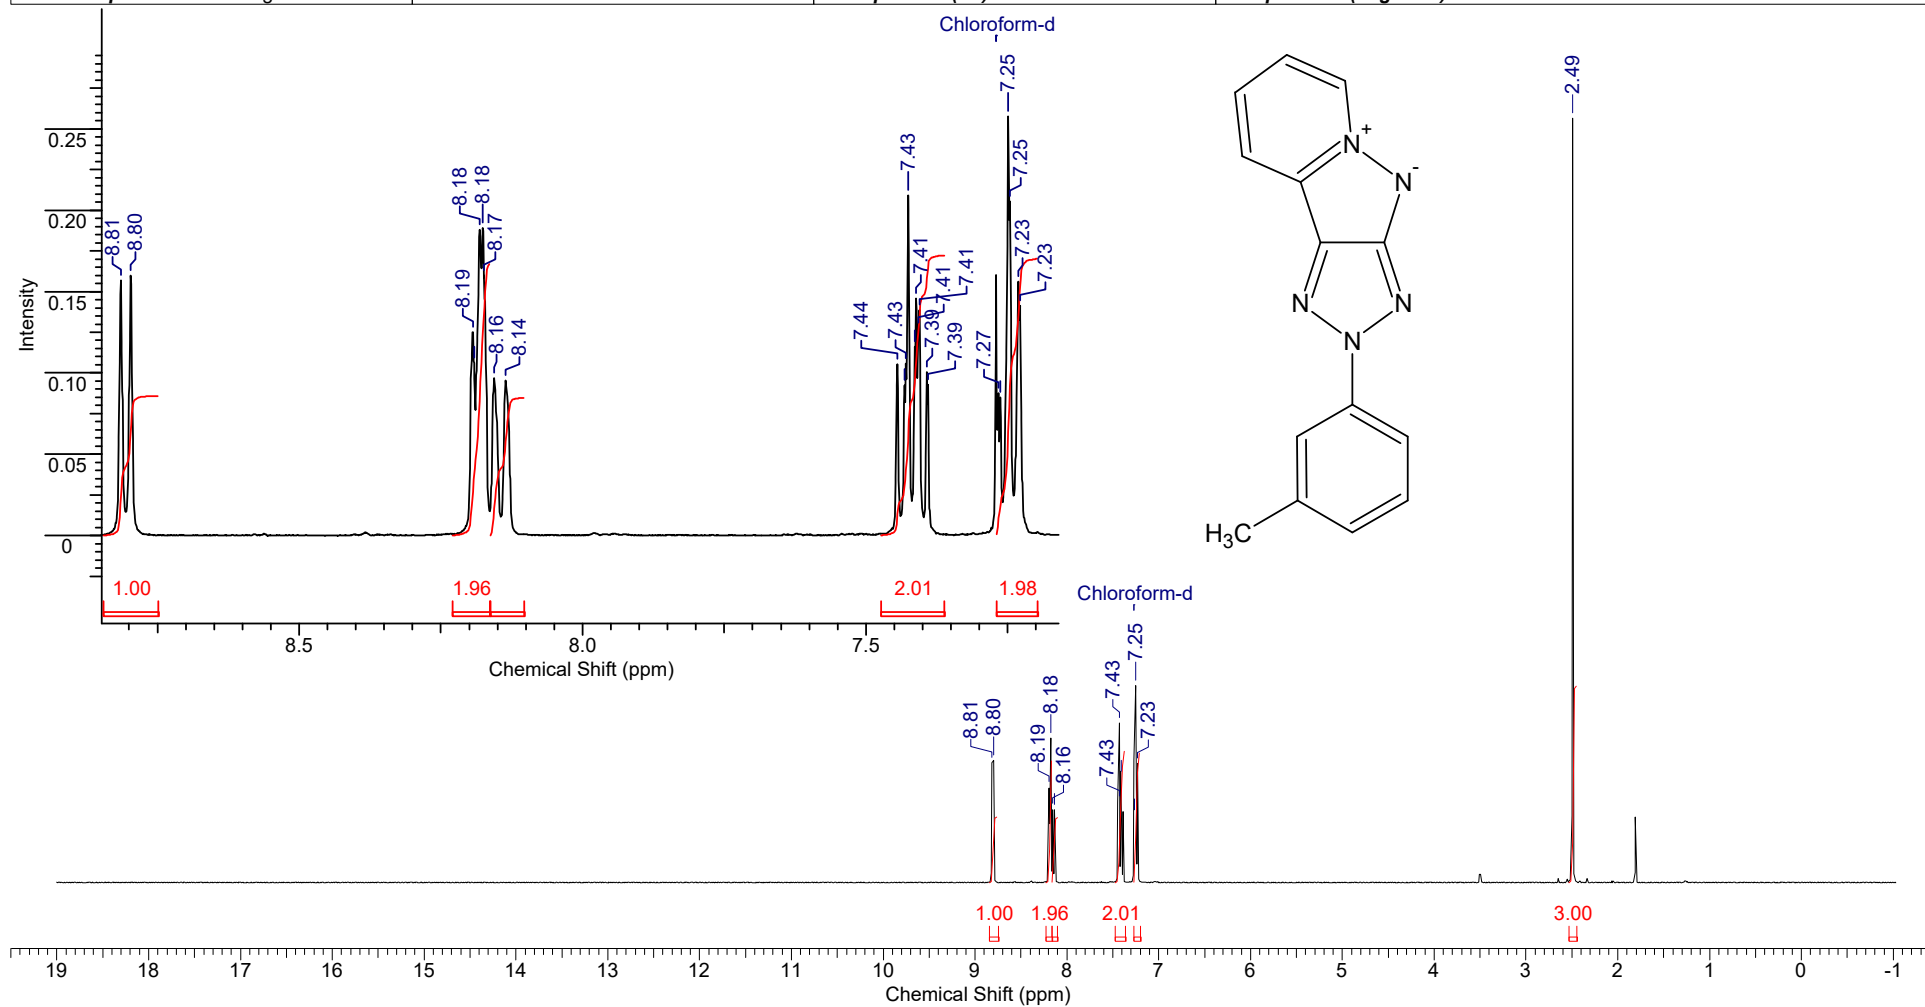

$^1\text{H}$  NMR spectrum of **3p** (400.1 MHz,  $\text{CDCl}_3$ )

|                               |                 |                             |                      |                              |                        |                               |        |
|-------------------------------|-----------------|-----------------------------|----------------------|------------------------------|------------------------|-------------------------------|--------|
| <b>Acquisition Time (sec)</b> | 0.6783          | <b>Comment</b>              | Imported from UXNMR. |                              | <b>Date</b>            | 04 Feb 2021 12:17:44          |        |
| <b>File Name</b>              |                 |                             |                      |                              | <b>Frequency (MHz)</b> | 100.61                        |        |
| <b>Nucleus</b>                | <sup>13</sup> C | <b>Number of Transients</b> | 513                  | <b>Original Points Count</b> | 16384                  | <b>Points Count</b>           | 131072 |
| <b>Pulse Sequence</b>         | zgpg30          | <b>Solvent</b>              | CHLOROFORM-D         | <b>Sweep Width (Hz)</b>      | 24154.59               | <b>Temperature (degree C)</b> | 27.000 |

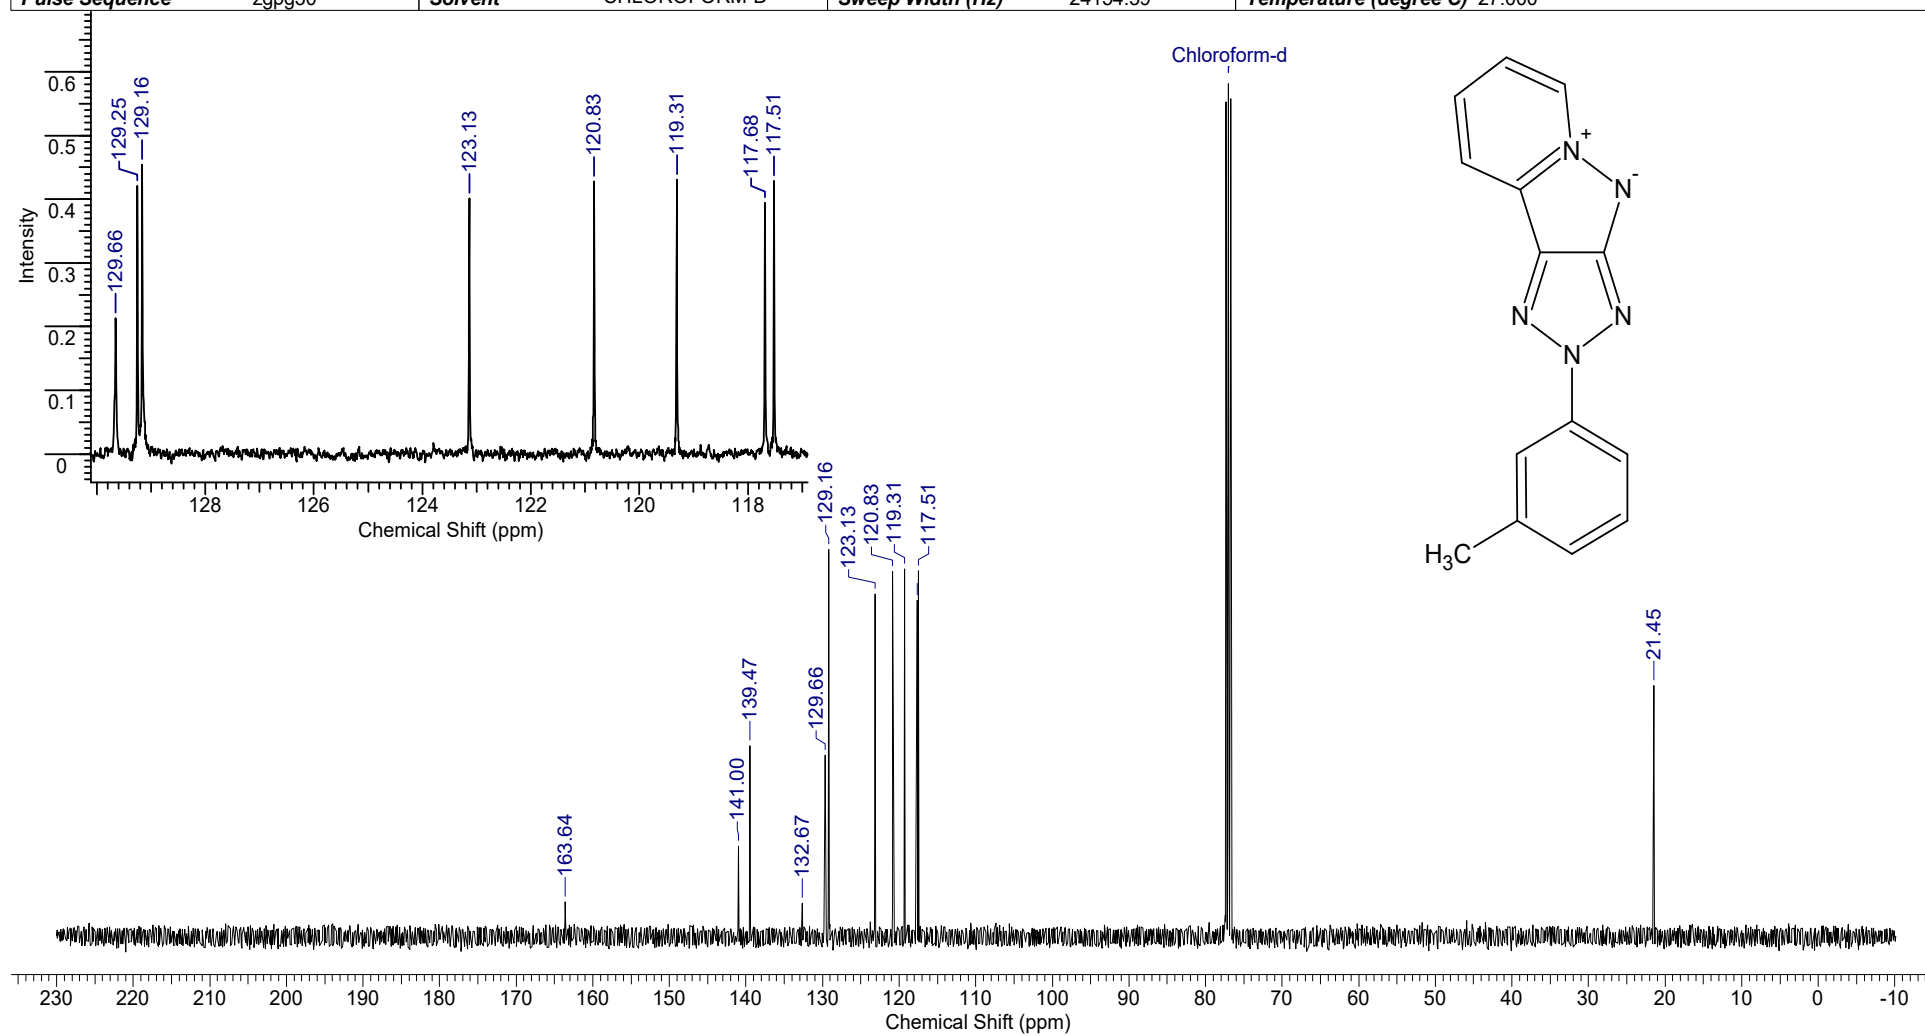

$^{13}\text{C}$  NMR spectrum of **3p** (100.6 MHz,  $\text{CDCl}_3$ )

|                               |                |                               |                      |                              |                         |                      |
|-------------------------------|----------------|-------------------------------|----------------------|------------------------------|-------------------------|----------------------|
| <b>Acquisition Time (sec)</b> | 4.0894         | <b>Comment</b>                | Imported from UXNMR. |                              | <b>Date</b>             | 30 Oct 2020 15:09:06 |
| <b>File Name</b>              |                | <b>Number of Transients</b>   | 4                    | <b>Original Points Count</b> | <b>Frequency (MHz)</b>  | 400.13               |
| <b>Nucleus</b>                | <sup>1</sup> H | <b>Solvent</b>                | CHLOROFORM-D         |                              | <b>Points Count</b>     | 131072               |
| <b>Pulse Sequence</b>         | zg30           | <b>Temperature (degree C)</b> | 27.000               |                              | <b>Sweep Width (Hz)</b> | 8012.82              |

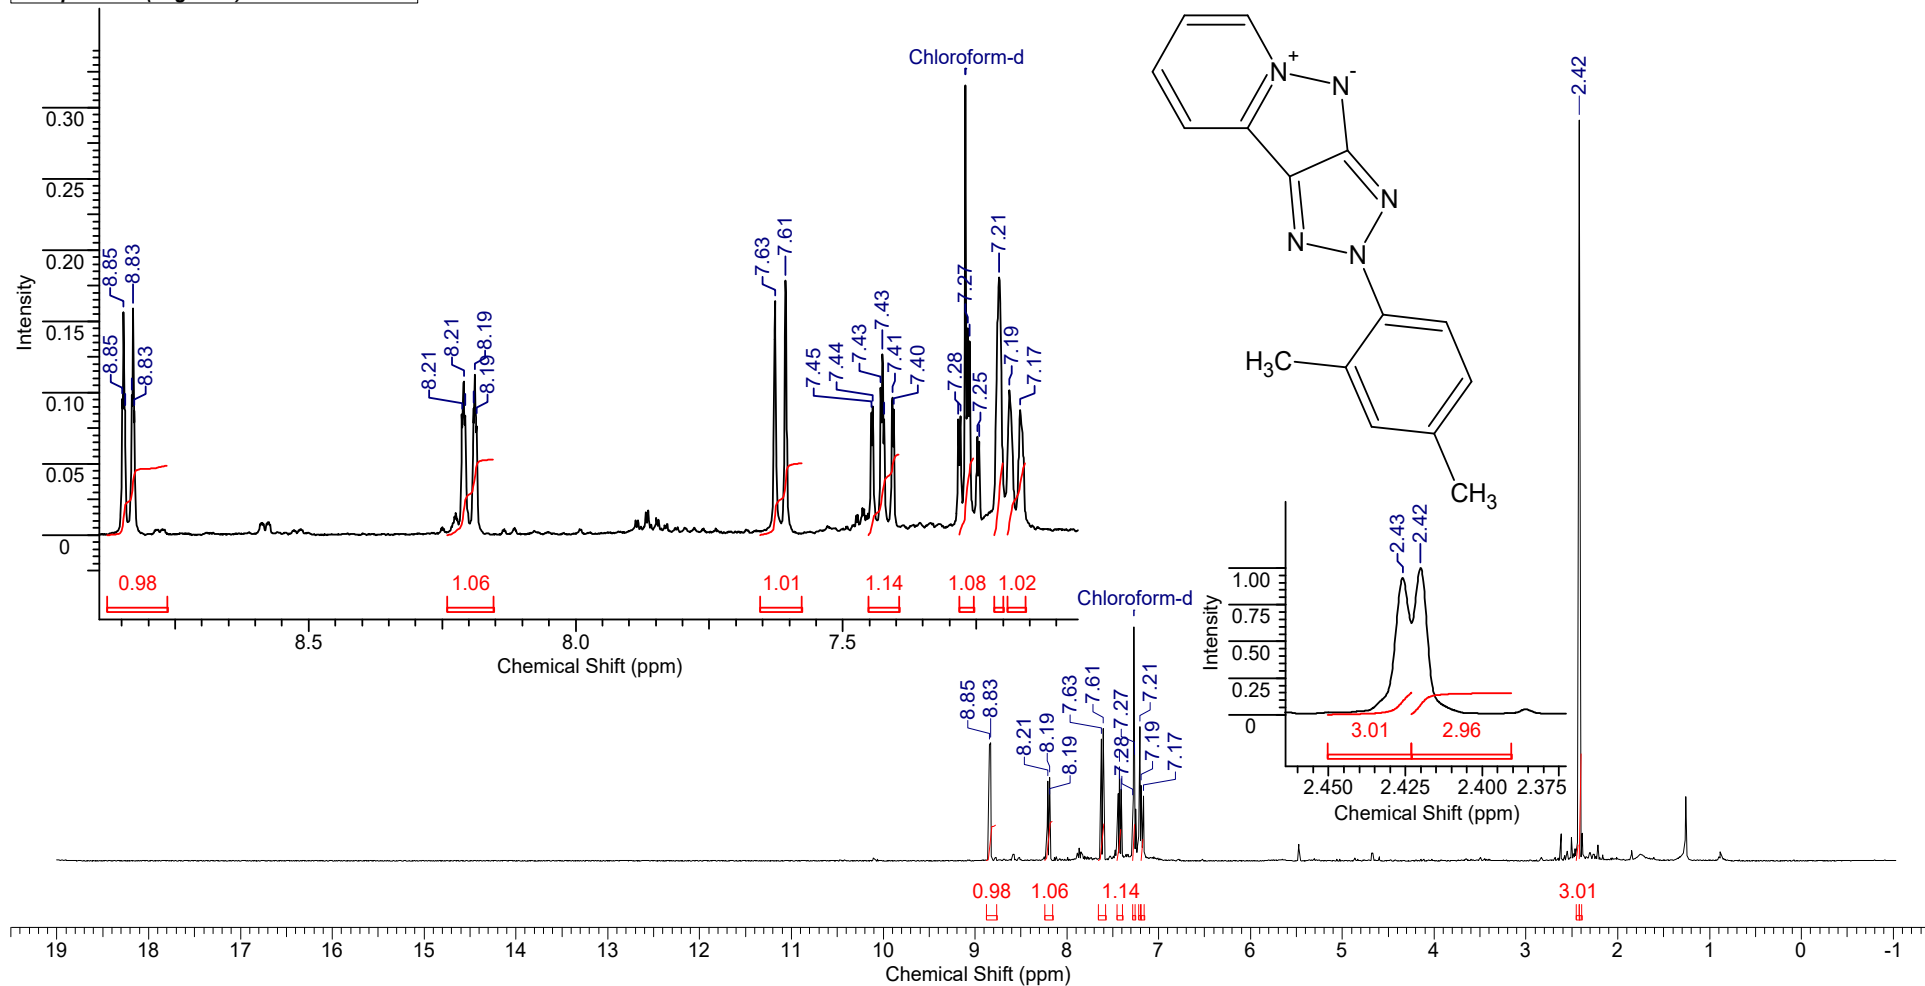



$^1\text{H}$  NMR spectrum of **3q** (400.1 MHz,  $\text{CDCl}_3$ )

|                               |                 |                             |                      |                              |                         |                      |        |
|-------------------------------|-----------------|-----------------------------|----------------------|------------------------------|-------------------------|----------------------|--------|
| <b>Acquisition Time (sec)</b> | 0.6783          | <b>Comment</b>              | Imported from UXNMR. |                              | <b>Date</b>             | 30 Oct 2020 15:21:08 |        |
| <b>File Name</b>              |                 |                             |                      |                              | <b>Frequency (MHz)</b>  | 100.61               |        |
| <b>Nucleus</b>                | <sup>13</sup> C | <b>Number of Transients</b> | 305                  | <b>Original Points Count</b> | 16384                   | <b>Points Count</b>  | 131072 |
| <b>Pulse Sequence</b>         | zgpg30          | <b>Solvent</b>              | CHLOROFORM-D         |                              | <b>Sweep Width (Hz)</b> | 24154.59             |        |
| <b>Temperature (degree C)</b> | 27.000          |                             |                      |                              |                         |                      |        |

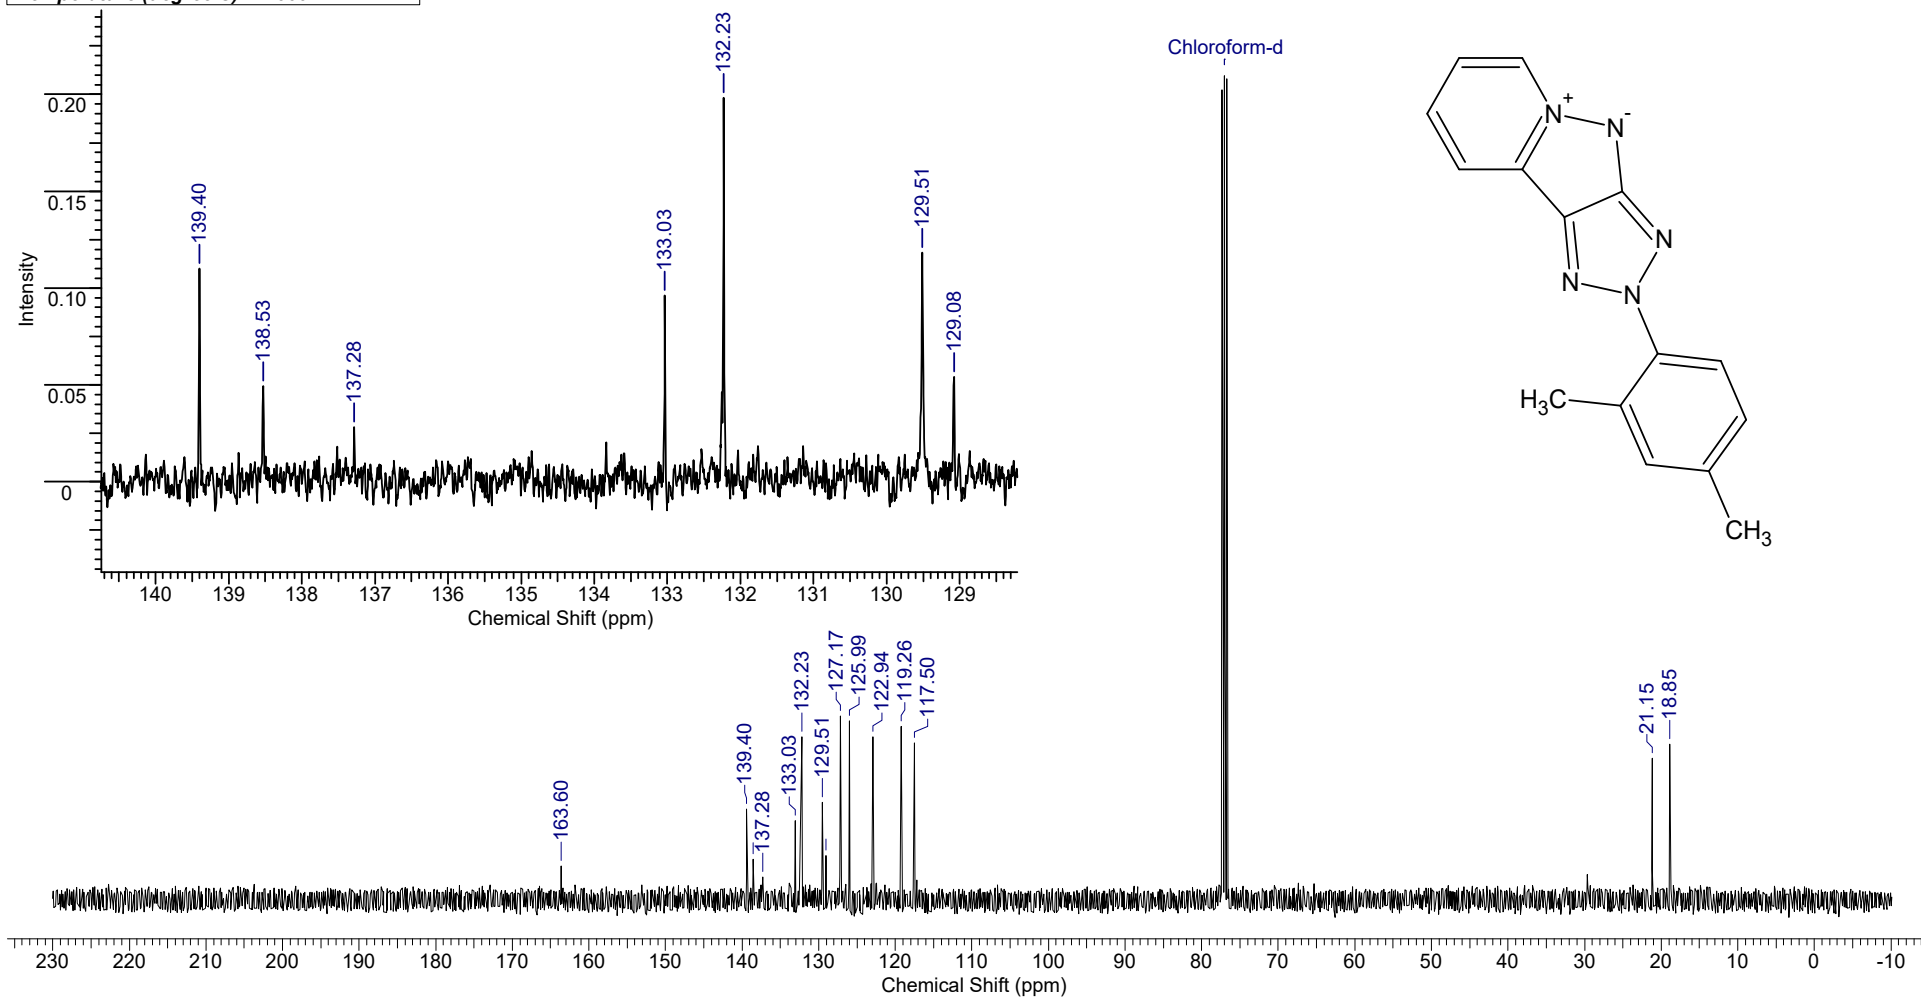

$^{13}\text{C}$  NMR spectrum of **3q** (100.6 MHz,  $\text{CDCl}_3$ )

|                               |                |                             |                      |                              |                         |                      |
|-------------------------------|----------------|-----------------------------|----------------------|------------------------------|-------------------------|----------------------|
| <b>Acquisition Time (sec)</b> | 4.0894         | <b>Comment</b>              | Imported from UXNMR. |                              | <b>Date</b>             | 16 Feb 2021 15:55:00 |
| <b>File Name</b>              |                | <b>Number of Transients</b> | 4                    | <b>Original Points Count</b> | <b>Frequency (MHz)</b>  | 400.13               |
| <b>Nucleus</b>                | <sup>1</sup> H |                             |                      |                              | <b>Points Count</b>     | 131072               |
| <b>Pulse Sequence</b>         | zg30           | <b>Solvent</b>              | CHLOROFORM-D         |                              | <b>Sweep Width (Hz)</b> | 8012.82              |
| <b>Temperature (degree C)</b> | 27.000         |                             |                      |                              |                         |                      |

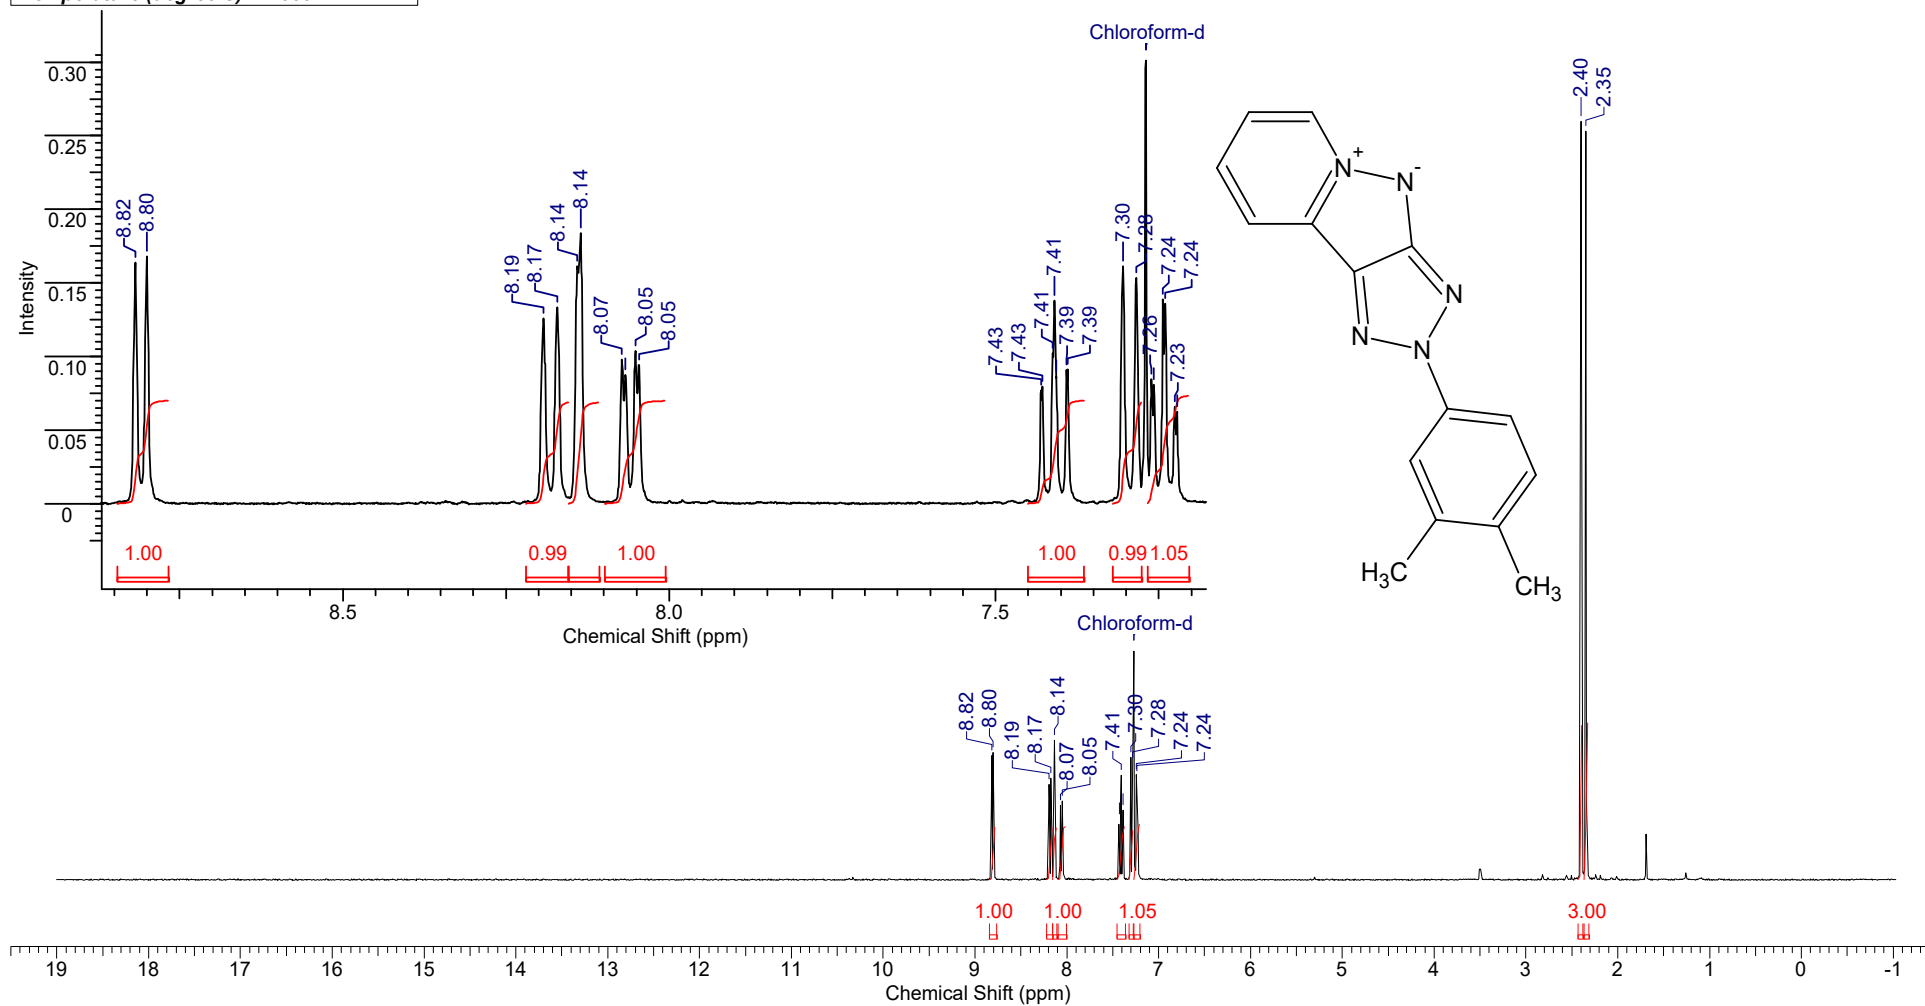

$^1\text{H}$  NMR spectrum of **3r** (400.1 MHz,  $\text{CDCl}_3$ )

|                               |          |                               |             |                             |              |                              |       |
|-------------------------------|----------|-------------------------------|-------------|-----------------------------|--------------|------------------------------|-------|
| <b>Acquisition Time (sec)</b> | 1.4156   | <b>Date</b>                   | Feb 24 2021 | <b>File Name</b>            |              |                              |       |
| <b>Frequency (MHz)</b>        | 100.58   | <b>Nucleus</b>                | 13C         | <b>Number of Transients</b> | 10000        | <b>Original Points Count</b> | 32768 |
| <b>Points Count</b>           | 32768    | <b>Pulse Sequence</b>         | s2pul       | <b>Solvent</b>              | CHLOROFORM-D |                              |       |
| <b>Sweep Width (Hz)</b>       | 23148.15 | <b>Temperature (degree C)</b> | 24.000      |                             |              |                              |       |

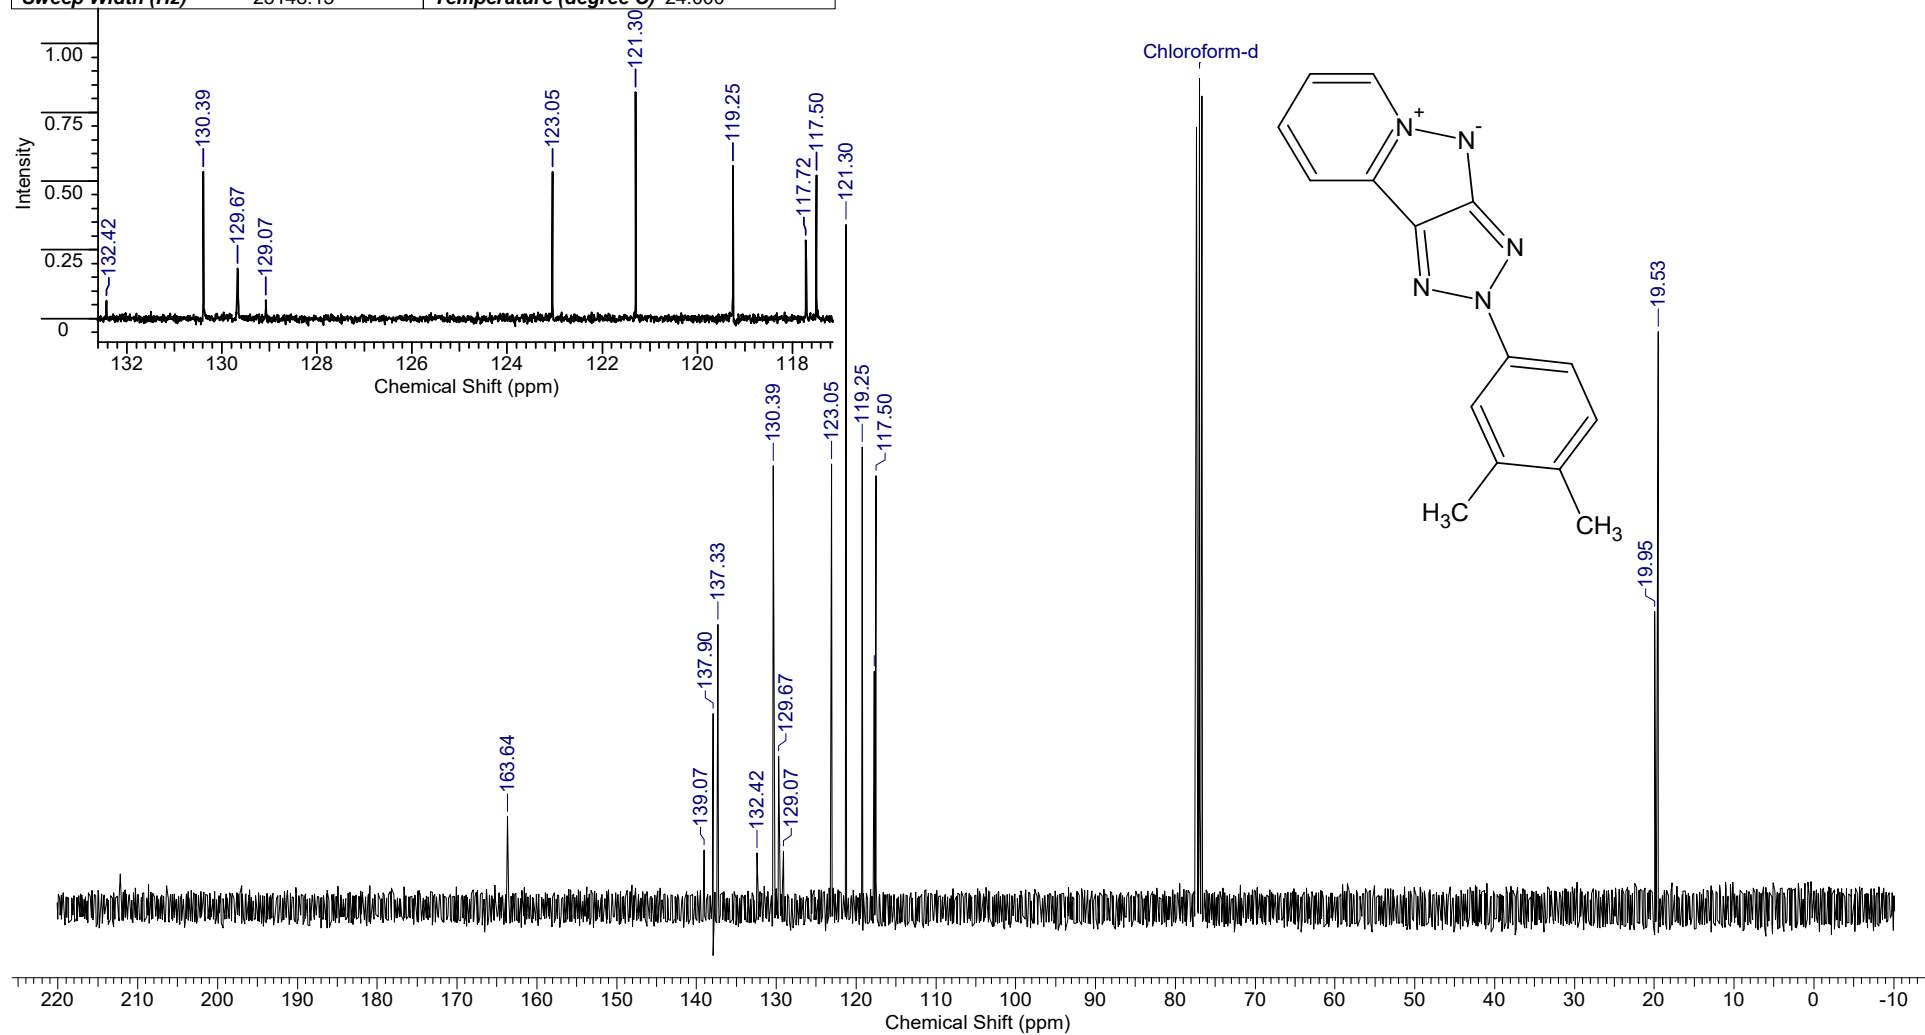

$^{13}\text{C}$  NMR spectrum of **3r** (100.6 MHz,  $\text{CDCl}_3$ )

|                               |        |                               |                      |                              |                         |                        |        |
|-------------------------------|--------|-------------------------------|----------------------|------------------------------|-------------------------|------------------------|--------|
| <b>Acquisition Time (sec)</b> | 4.0894 | <b>Comment</b>                | Imported from UXNMR. |                              | <b>Date</b>             | 24 Feb 2021 17:19:56   |        |
| <b>File Name</b>              |        | <b>Number of Transients</b>   | 4                    | <b>Original Points Count</b> | 32768                   | <b>Frequency (MHz)</b> | 400.13 |
| <b>Nucleus</b>                | 1H     | <b>Solvent</b>                | CHLOROFORM-D         |                              | <b>Points Count</b>     | 131072                 |        |
| <b>Pulse Sequence</b>         | zg30   | <b>Temperature (degree C)</b> | 27.000               |                              | <b>Sweep Width (Hz)</b> | 8012.82                |        |

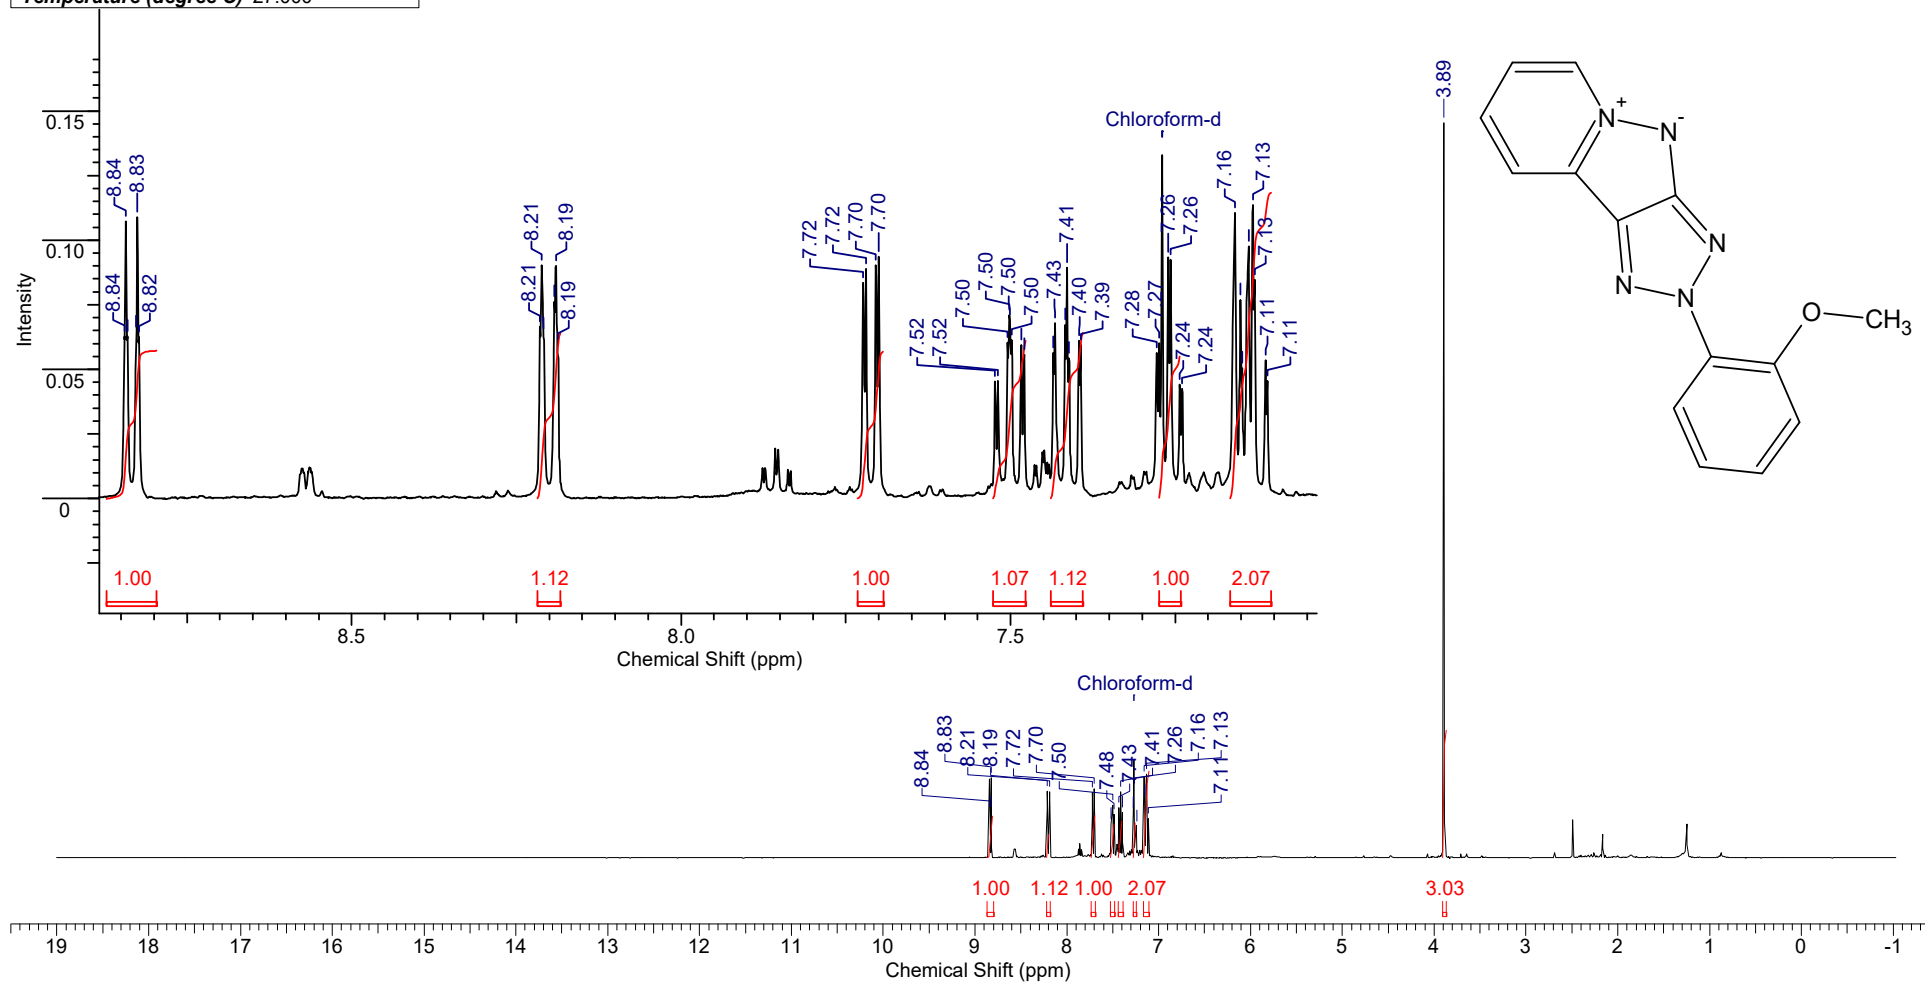



<sup>1</sup>H NMR spectrum of **3s** (400.1 MHz, CDCl<sub>3</sub>)

25 Jul 2021

|                               |        |                             |                      |                               |                      |
|-------------------------------|--------|-----------------------------|----------------------|-------------------------------|----------------------|
| <b>Acquisition Time (sec)</b> | 0.6783 | <b>Comment</b>              | Imported from UXNMR. | <b>Date</b>                   | 25 Feb 2021 12:10:30 |
| <b>File Name</b>              |        |                             |                      | <b>Frequency (MHz)</b>        | 100.61               |
| <b>Nucleus</b>                | 13C    | <b>Number of Transients</b> | 337                  | <b>Original Points Count</b>  | 16384                |
| <b>Pulse Sequence</b>         | zgpg30 | <b>Solvent</b>              | Chloroform-d         | <b>Points Count</b>           | 131072               |
|                               |        |                             |                      | <b>Sweep Width (Hz)</b>       | 24154.59             |
|                               |        |                             |                      | <b>Temperature (degree C)</b> | 27.000               |

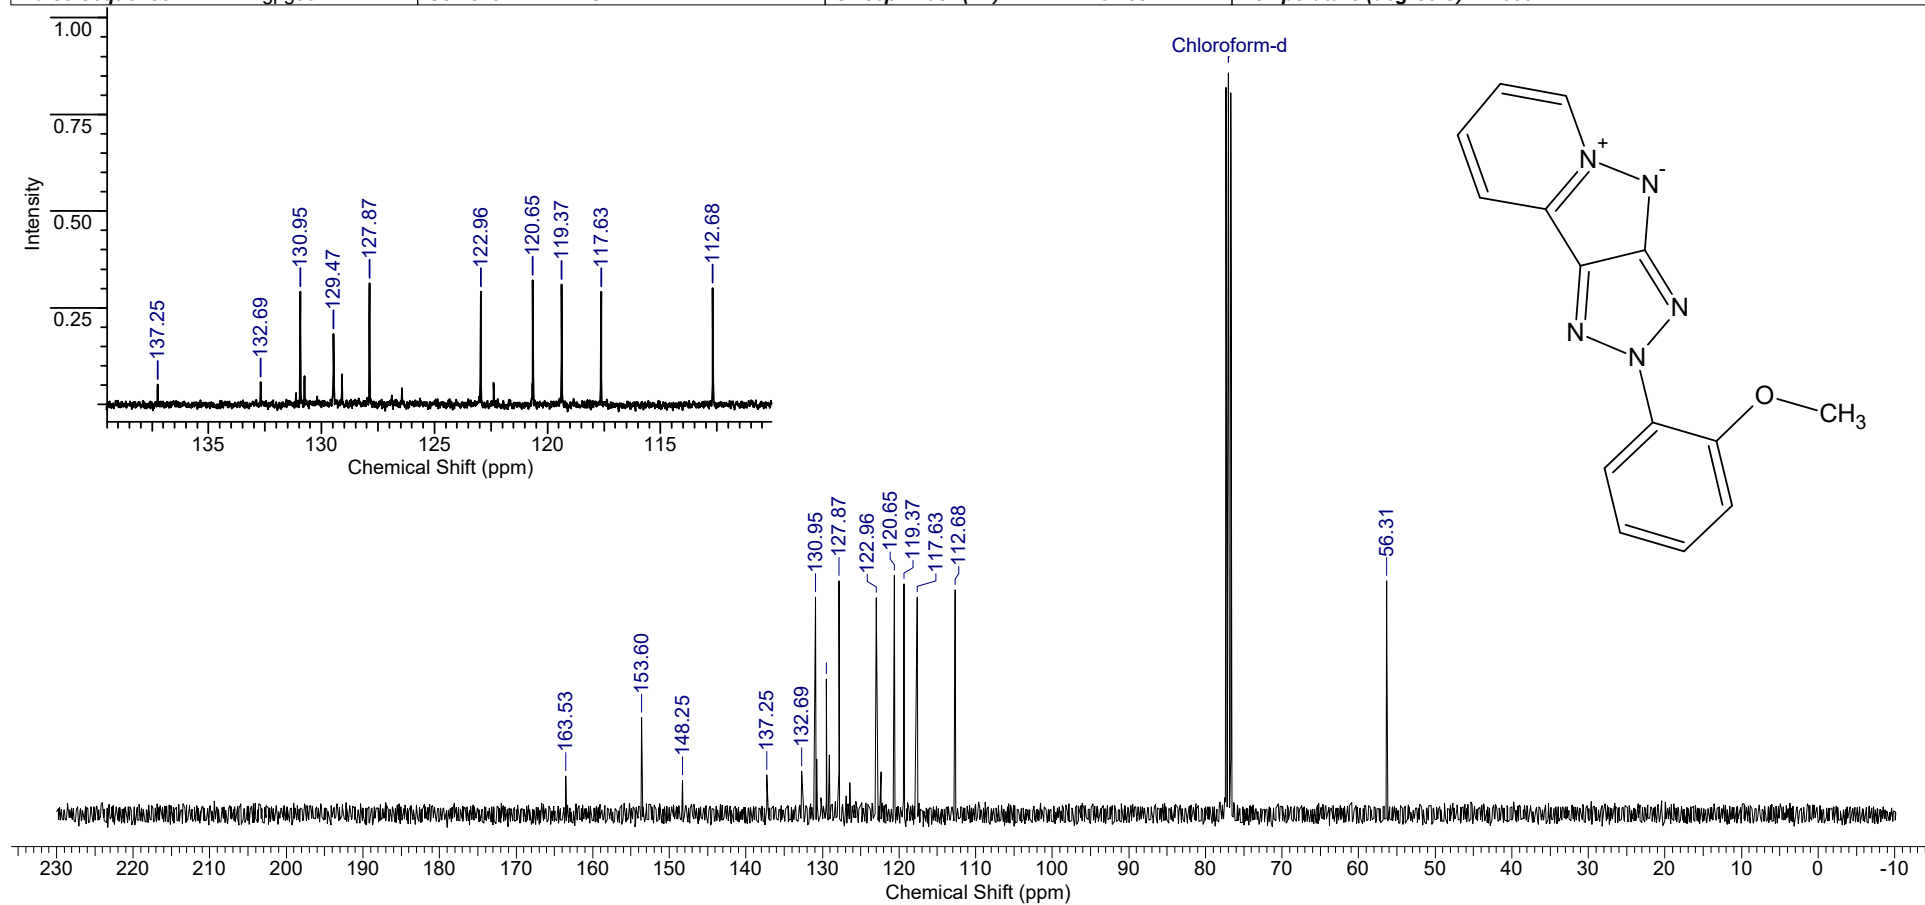

<sup>13</sup>C NMR spectrum of **3s** (100.6 MHz, CDCl<sub>3</sub>)

|                               |        |                             |                      |                              |                         |                      |        |
|-------------------------------|--------|-----------------------------|----------------------|------------------------------|-------------------------|----------------------|--------|
| <b>Acquisition Time (sec)</b> | 4.0894 | <b>Comment</b>              | Imported from UXNMR. |                              | <b>Date</b>             | 17 Feb 2021 17:50:16 |        |
| <b>File Name</b>              |        |                             |                      |                              | <b>Frequency (MHz)</b>  | 400.13               |        |
| <b>Nucleus</b>                | 1H     | <b>Number of Transients</b> | 4                    | <b>Original Points Count</b> | 32768                   | <b>Points Count</b>  | 131072 |
| <b>Pulse Sequence</b>         | zg30   | <b>Solvent</b>              | CHLOROFORM-D         |                              | <b>Sweep Width (Hz)</b> | 8012.82              |        |
| <b>Temperature (degree C)</b> | 27.000 |                             |                      |                              |                         |                      |        |

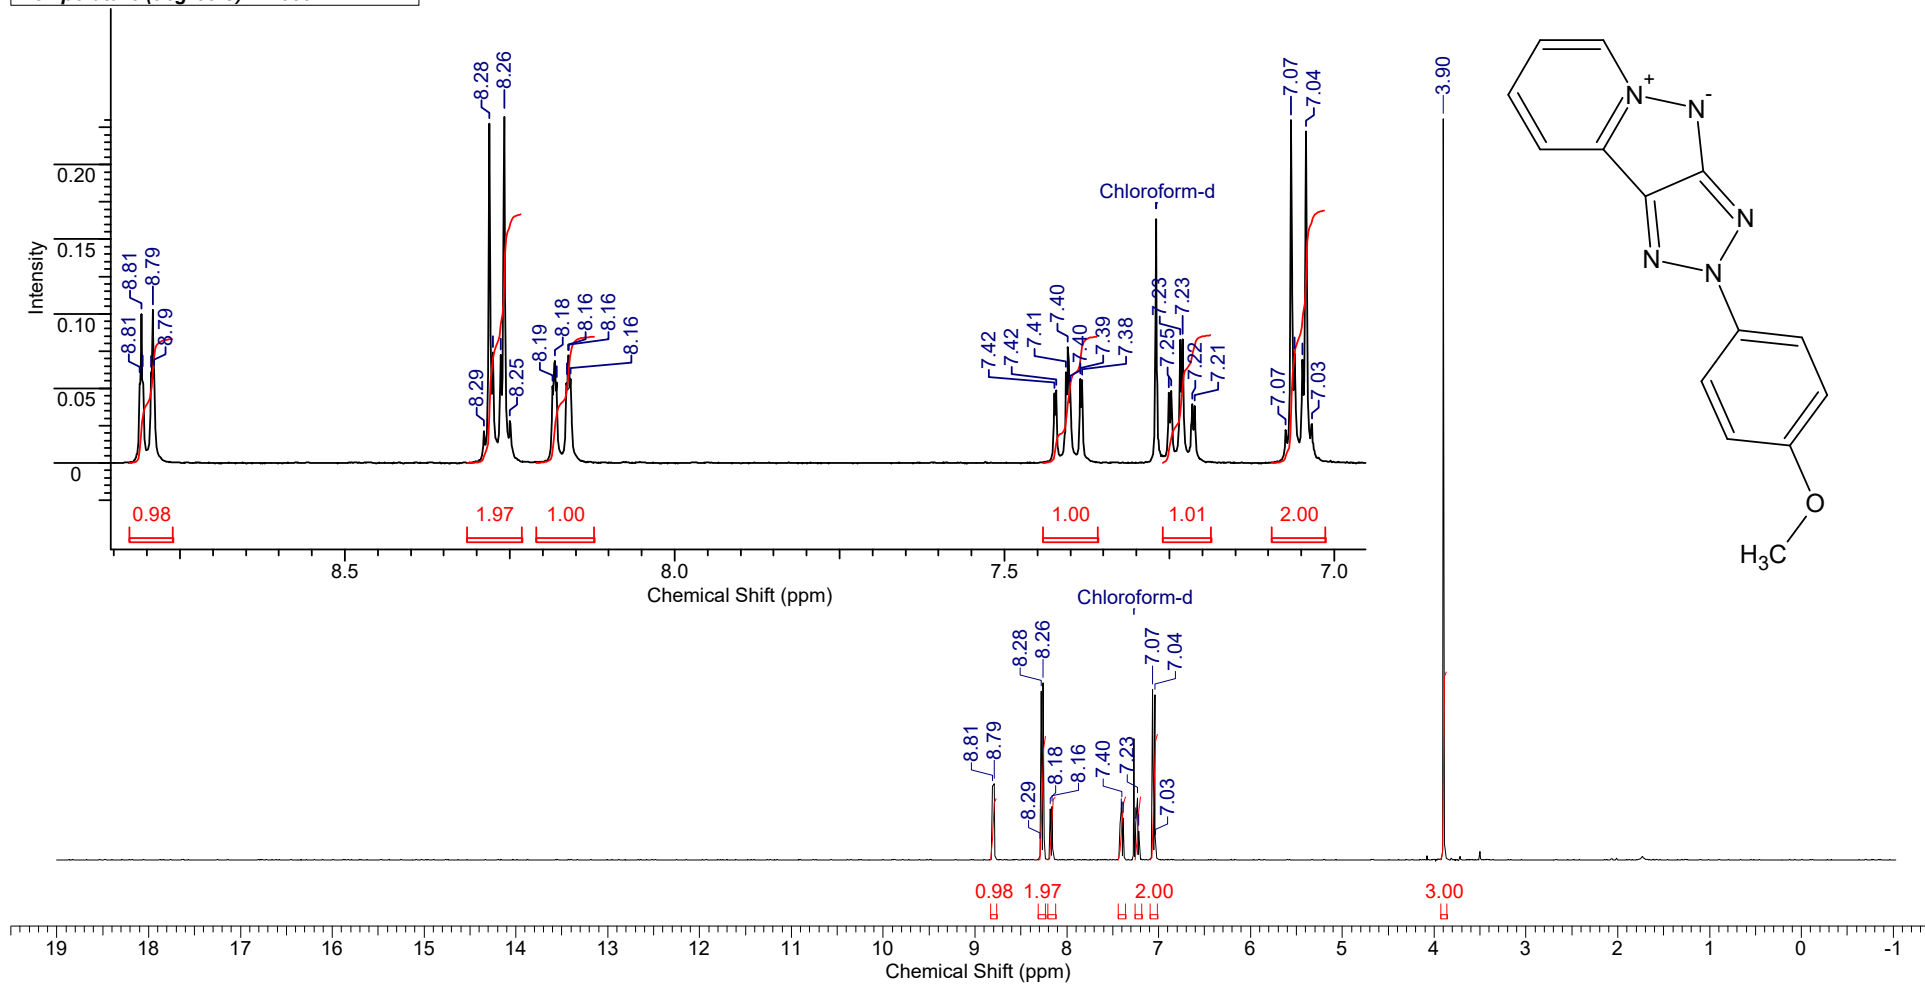

$^1\text{H}$  NMR spectrum of **3t** (400.1 MHz,  $\text{CDCl}_3$ )

|                        |          |                        |             |                      |              |                       |       |
|------------------------|----------|------------------------|-------------|----------------------|--------------|-----------------------|-------|
| Acquisition Time (sec) | 1.3631   | Date                   | Feb 24 2021 | File Name            |              |                       |       |
| Frequency (MHz)        | 100.58   | Nucleus                | 13C         | Number of Transients | 10000        | Original Points Count | 32768 |
| Points Count           | 32768    | Pulse Sequence         | s2pul       | Solvent              | CHLOROFORM-D |                       |       |
| Sweep Width (Hz)       | 24038.46 | Temperature (degree C) | 24.000      |                      |              |                       |       |

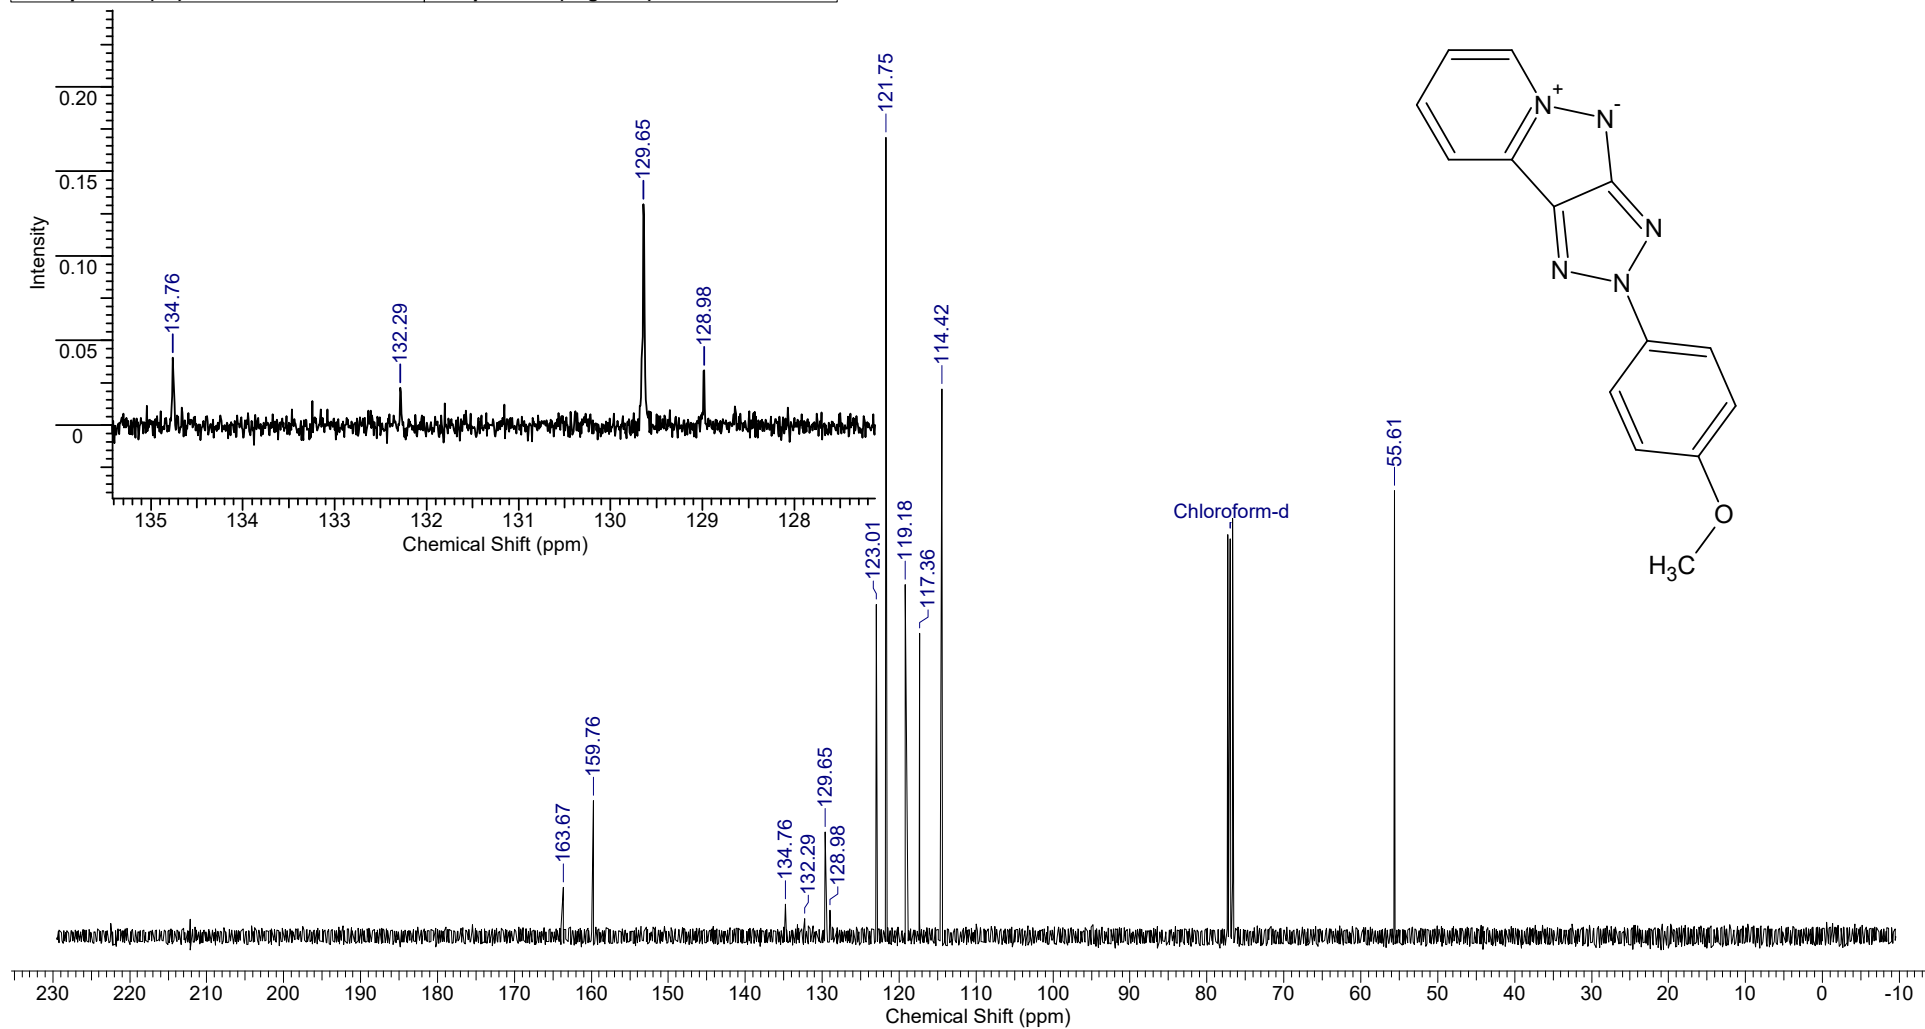

$^{13}\text{C}$  NMR spectrum of **3t** (100.6 MHz,  $\text{CDCl}_3$ )
